# Supplementary material for: Multiscale network analysis reveals molecular mechanisms and key regulators of the tumor microenvironment in gastric cancer
Source: Int J Cancer. 2019 Oct 11;146(5):1268–80. doi: 10.1002/ijc.32643 (PMC7004118; doi:10.1002/ijc.32643)
Supplement: Supplementary file 1 — Supporting Material 1. Supporting Materials and Methods Descriptions, Supporting Results and Supporting Figures 1–10. Supporting Material 2. A. Ranked table of gene modules identified by MEGENA. B. Module preservation statistics of TCGA‐GCC modules in GSE84437 and vTCGA‐GCC cohorts. C. Patient barcodes of primary tumor samples used in TCGA‐GCC and vTCGA‐GCC. Supporting Material 3. A. Somatic mutation oncomatrix generated using maftools R package. B. Significant enrichment of somatic mutation gene signatures in MEGENA modules with BH FDR corrected FET p‐value <0.05. Supporting Material 4. Differentially expressed genes in GKN2 over‐expressed AGS cells compared to the mock control. Supporting Material 5. Computationally inferred cell types in TCGA‐GCC primary tumor samples. A. ESTIMATE inferred stromal/immune cell scores. B. CIBERSORT inferred immune cell type compositions. C. ESTIMATE inferred stromal cell correlated gene signature in TCGA‐GCC. D. ESTIMATE inferred stromal cell correlated gene signature in vTCGA‐GCC. E. Correlation between hub genes of M102 and CIBERSORT inferred cell type compositions. Supporting Material 6. Differentially expressed genes (DEGs) and differentially methylated CpG sites (DMR) in EBV subtype, compared to other primary GC in TCGA‐GCC. A. Differential expression between EBV subtype and the rest of primary GC in TCGA‐GCC. B. List of genes in EBV‐specific hyper‐methylation gene signature (EBV‐HEMG) by intersecting significantly down‐regulated genes and hyper‐methylated genes in cis in EBV subtype. C. List of genes in EBV‐specific hypo‐methylation gene signature (EBV‐HOMG) by intersecting significantly up‐regulated genes and hypo‐methylated genes in cis in EBV subtype. Supporting Material 7. Supporting results for correlation analysis between methylation and gene expression profiles. A. cis−/trans‐eMSG signatures identified by Bonferroni corrected p‐value <0.05 by Spearman correlation analysis. B. Table of all pairwise tests between eMSGs a [file IJC-146-1268-s001.pdf]

**Supporting Materials for *Multiscale Network Analysis Reveals Molecular Mechanisms and Key Regulators of the Tumor Microenvironment in Gastric Cancer***

Won-Min Song, Xiandong Lin, Xuehong Liao, Dan Hu, Jieqiong Lin, Umut Sarpel, Yunbin Ye, Yael Feferman, Daniel M. Labow, Martin J. Walsh, Xiongwei Zheng and Bin Zhang

**Table of Contents**

**Supporting Material 1**

|                                                                                                                              |   |
|------------------------------------------------------------------------------------------------------------------------------|---|
| Supporting Materials and Methods.....                                                                                        | 3 |
| Bioinformatics Analysis.....                                                                                                 | 3 |
| Co-expression network analysis.....                                                                                          | 3 |
| Extraction of Somatic Mutation Gene Signatures (SMGs).....                                                                   | 3 |
| Extraction of cis-/trans-methylation significantly correlated gene signatures (cis-/trans-eMSGs).....                        | 4 |
| Extraction of EBV subtype specific differentially expressed genes (DEGs) and differentially methylated CpG sites (DMRs)..... | 4 |
| Acquiring prognostic significance of individual gene expressions from KM-plotter.....                                        | 4 |
| Extraction of gene perturbation signatures: .....                                                                            | 4 |
| In-silico validation of gene-gene interactions.....                                                                          | 5 |
| Eigen-gene analysis to clinical traits.....                                                                                  | 5 |
| Code Availability .....                                                                                                      | 5 |
| Experimental Procedure.....                                                                                                  | 6 |
| Tissue microarray and Immunohistochemical Staining for GKN2.....                                                             | 6 |
| Statistical analysis of pathological features .....                                                                          | 6 |
| Real-time RT-PCR assay .....                                                                                                 | 6 |
| Lentiviral Transduction and Establishment of Stable Cell Lines.....                                                          | 7 |
| Cellular fractionation and western blotting (WB).....                                                                        | 7 |
| Cell viability assay using the xCELLigence Real Time Cell Analyzer (RTCA).....                                               | 7 |
| Measurement of colony formation .....                                                                                        | 8 |
| Cell migration and invasion assay .....                                                                                      | 8 |
| RNA preparation for mRNA-Seq .....                                                                                           | 8 |

|    |                                                                                                    |     |
|----|----------------------------------------------------------------------------------------------------|-----|
| 1  | Library construction and sequencing .....                                                          | 8   |
| 2  | Supporting Results .....                                                                           | 9   |
| 3  | NEB mutations as an up-stream regulator of Epithelial-Mesenchymal Transition (EMT) pathways .....  | 9   |
| 4  | GKN2 over-expression inhibits proliferation and invasion of gastric cancer cells.....              | 9   |
| 5  | GKN2 suppresses the oncogenic PTEN/PI3K/AKT/mTOR and JAK/STAT pathways .....                       | 10  |
| 6  | Global epigenetic alterations functionally impact key pathways in gastric cancer progression ..... | 10  |
| 7  | Supporting Tables .....                                                                            | 12  |
| 8  | <i>Supporting Figures</i> .....                                                                    | 14  |
| 9  | References.....                                                                                    | 25  |
| 10 | <b>Supporting Material 2A</b> .....                                                                | 27  |
| 11 | <b>Supporting Material 2B</b> .....                                                                | 28  |
| 12 | <b>Supporting Material 2C</b> .....                                                                | 30  |
| 13 | <b>Supporting Material 3A</b> .....                                                                | 31  |
| 14 | <b>Supporting Material 3B</b> .....                                                                | 32  |
| 15 | <b>Supporting Material 4</b> .....                                                                 | 34  |
| 16 | <b>Supporting Material 5A</b> .....                                                                | 40  |
| 17 | <b>Supporting Material 5B</b> .....                                                                | 45  |
| 18 | <b>Supporting Material 5C</b> .....                                                                | 48  |
| 19 | <b>Supporting Material 5D</b> .....                                                                | 69  |
| 20 | <b>Supporting Material 5E</b> .....                                                                | 75  |
| 21 | <b>Supporting Material 6A</b> .....                                                                | 76  |
| 22 | <b>Supporting Material 6B</b> .....                                                                | 87  |
| 23 | <b>Supporting Material 6C</b> .....                                                                | 88  |
| 24 | <b>Supporting Material 7A</b> .....                                                                | 89  |
| 25 | <b>Supporting Material 7B</b> .....                                                                | 90  |
| 26 | <b>Supporting Material 7B</b> .....                                                                | 100 |

# Supporting Materials and Methods

## Bioinformatics Analysis

### Co-expression network analysis

Gene co-expression networks were identified by using Multiscale Embedded Gene Co-expression Network Analysis (MEGENA)<sup>1</sup>. Briefly, MEGENA first selects gene pairs with significant correlations ( $FDR < 0.05$ ) and then embeds them onto a 3-dimensional topological sphere. The resulting co-expression network belongs to a class of geometrical networks called “planar filtered networks (PFNs)” which can be drawn on the surface of the sphere without any link intersections. PFNs then go through unsupervised clustering for identification of network clusters (*i.e.* gene modules) at various resolutions<sup>1</sup>. The resulting gene modules are organized in a hierarchy. The hierarchy represents multi-scale organization of gene modules with different degrees of compactness. It captures a series of relationships of higher-order (*i.e.* parent) modules possessing children modules residing within these parent modules. MEGENA recognizes more compact children modules within the parent modules<sup>1</sup>. Furthermore, candidate key drivers of gene modules are further identified by means of statistically significant hubs<sup>1</sup>. Gene modules are then annotated by the enriched MSigDB signatures and associated with outcomes through the enrichment test of the previously identified gene. For MSigDB signatures, we used publicly curated functions and pathways signatures from v5.0: c2.cp.biocarta (BIOCARTA selection), c2.cp.kegg (KEGG), c2.cp.reactome (REACTOME), c5.bp (Gene ontology – biological processes), c5.cc (Gene ontology – cellular components), c5.mf (Gene ontology – molecular functions), c6.all (oncogenic signatures) and h.all (hallmark signatures). MEGENA yielded total of 221 gene modules with sizes greater than 50 genes.

### Extraction of Somatic Mutation Gene Signatures (SMGs)

We first downloaded publicly available somatic mutation calls by Varscan pipeline for gastric cancer from The Cancer Genome Atlas (TCGA) database (<https://portal.gdc.cancer.gov/>, chosen fields: Primary site-Stomach, Data Type-Masked Somatic Mutation, Workflow Type-VarScan2 Variant Aggregation and Masking). We processed the downloaded .maf file using R package *maftools* (version 1.1.60)<sup>2</sup>. Using *maftools* software, we further excluded mutations that are: i) silent (flags: 3'UTR, 5'UTR, 3'Flank, Targeted\_Region, Silent, Intron, RNA, IGR, Splice\_Region, 5'Flank, lincRNA), ii) any of the following genes marked as blacklist in *maftools* package : TTN, MUC16, SYNE1, FLG, iii) and genes whose non-silent mutations were less than 5% of all samples (*i.e.* mutations less than 4 samples were discarded for primary tumor analysis). Per gene with somatic mutations after these filters, differentially expressed genes in mutant samples compared to the wildtypes were identified by R package *limma* version 3.28.17 based on Benjamini-Hochberg False Discovery Rate (BH FDR)  $< 0.05$  and expression fold change (FC)  $> 1.2$ .

## **Extraction of cis-/trans-methylation significantly correlated gene signatures (cis-/trans-eMSGs)**

We leveraged publicly available Illumina Infinium 450k methylation BeadChip array data for TCGA-GCC cohort data analysis. We leveraged beta-values, and applied the same data quality control procedure as gene expression data: quantile normalization, followed by correction for batch effects by center, platform and tissue source site (TSS) ids from TCGA sample barcodes, and correction for confounding factors including race, age and gender. This led to 355 primary tumor samples for methylation alone, and 211 samples after intersecting for common samples with gene expression data. In order to define cis-regulatory CpG sites, we leveraged the annotations for CpG probes mapped to respective gene symbols for Illumina 450k methylation array. Within cis pairs and trans pairs, we applied Spearman correlation test to evaluate statistical significance with Bonferroni corrected p-value  $< 0.05$  as the significance threshold. This resulted to: negative cis-eMSGs – 4,004 genes, positive cis-eMSGs – 1,529 genes, negative trans- eMSGs – 8,266 genes, and positive trans- eMSGs – 7,352 genes.

## **Extraction of EBV subtype specific differentially expressed genes (DEGs) and differentially methylated CpG sites (DMRs)**

To obtain the EBV specific DEGs, we applied limma (3.36.1) to the normalized TCGA-GCC gene expressions by contrasting EBV subtype (as compiled by previous TCGA publication<sup>3</sup>) against the non-EBV subtypes within primary GC tumors in TCGA-GCC. Significant DEGs were defined by FDR  $< 0.05$  with fold change  $> 1.2$  for up-regulations, and fold change  $< 1/1.2$  for down-regulations. To obtain EBV specific DMRs, we similarly applied limma to the normalized beta-values by contrasting EBV subtype against non-EBV subtype samples with FDR  $< 0.05$ . The full results of EBV specific DEGs and DMRs are reported in Supplemental Material 5.

## **Acquiring prognostic significance of individual gene expressions from KM-plotter**

We utilized publicly available microarray gene expression data from km-plotter website for gastric cancer (<http://kmplot.com/analysis/index.php?p=service&cancer=gastric>). We specifically required data sets used for analysis to exclude QC-failing arrays (Array Quality Control = “exclude biased arrays”) and further exclude GSE62254, which is reported to have markedly different survival characteristics by the authors. We chose to use “auto select best cutoff = yes”, and ran analysis on overall survival (i.e. OS in Survival dropdown menu).

## **Extraction of gene perturbation signatures:**

- ESRP1/2 knock down signature: We extracted ESRP1/2 double knock-down gene expression signatures by short interfering RNA (siRNA) knockdown in human PNT2 cells as described by Warzecha et al. 2009.<sup>6</sup> The microarray data were publicly available from Gene Expression Omnibus (GEO) under accession number, GSE17468. The downloaded data were further quantile normalized, then t-test was performed between 4 replicates of GFP controls

and 4 replicates of ESRP1/2 double knock-down samples. FDR adjusted p-value  $< 0.05$  with fold-change  $> 1.2$ . Gene symbols from significantly differentially expressed probes were aggregated. This resulted in 1,025 up-regulated, and 736 down-regulated genes.

- GKN2 over-expression signature: 2 replicates of lenti-viral transduced AGS cells over-expressing GKN2 were subject to RNA-sequencing, and Fragments Per Kilobase of transcript per Million mapped reads (FPKM) values were calculated. R package software “edgeR”<sup>4</sup> was utilized to calculate differentially expressed genes with FDR corrected p-value  $< 0.05$ , fold change  $> 1.2$ . This resulted in 253 up-regulated, and 401 down-regulated genes.

## **In-silico validation of gene-gene interactions**

We validated the network structures around ESRP1/2 and GKN2 using the gene perturbation signatures derived independent experiments (see *Extraction of gene perturbation signatures*). The gene perturbation signatures were projected onto the neighborhoods of the corresponding genes in a given PFN for enrichment test. Specifically,  $l$ -layer neighborhood of a gene,  $g$ , is defined as the set of genes whose shortest paths to  $g$  consists of  $l$  edges at most. The network structure around a gene is successfully validated if the BH FDR corrected FET p-value  $< 0.05$  within 5-layer neighborhood.

## **Eigen-gene analysis to clinical traits**

To relate each cluster with clinical outcomes, principal component analysis (PCA) is first performed for each cluster and then the correlation between the first (or multiple) principal component(s) and each trait is computed as cluster relevance to the trait.

For patient survival data, the association is examined by multivariate Cox proportional hazards regression model that regresses patient survival onto the first (or multiple) principal component(s) of a given module, and Cox p-value is calculated to evaluate the significance. To further investigate prognostic power of each cluster, logrank p-value is calculated to characterize the difference between the survival curves of two molecular subtypes defined by the median expression of the first PC of each cluster.

## **Code Availability**

MEGENA software (version 1.3.7) is publicly available as R package in The Comprehensive R Archive Network (CRAN) (<https://cran.r-project.org/web/packages/MEGENA/index.html>). The development version of MEGENA is available from GitHub repository (<https://github.com/songw01/MEGENA>). Other codes for performing Somatic Mutation Gene (SMG) signatures, methylation correlated signatures (cis-/trans-meSCGs) and *in-silico* gene-gene interaction validation are available from the corresponding author upon reasonable request.

## **Experimental Procedure**

### **Tissue microarray and Immunohistochemical Staining for GKN2**

Tissue microarray recipient blocks containing 104 gastric cancer tissues and normal tissues were constructed from formalin-fixed paraffin embedded specimens. We located the appropriate tissue of the normal tissue and tumor under the microscope. Then three tissue cores (1.5 mm in diameter) were transferred to a new recipient paraffin block using a microarray instrument, according to established methods. One cylinder of normal gastric mucosa adjacent to each tumor was also transferred to the recipient block. Sections (3 mm thick) were cut the day before use and stained according to standard protocol.

Immunostaining was done on 5-um paraffin embedded tissue sections using antigen retrieval with EDTA buffer and the EliVision plus horseradish peroxidase. The sections were incubated overnight at 4°C with GKN2 antibodies (1/200; Abcam, Cambridge, UK). The results were reviewed independently by two pathologists. Immunostaining was assessed semiquantitatively by measuring both the intensity of the staining (0,1,2,or3) and extent of staining(0,0%;1,0-10%;2,10-50%;3,50-100%).The scores for the intensity and extent of staining were multiplied to give a weighted score for each case (maximum possible,9). For the statistical analysis, the weighted scores were grouped in two categories where scores of 0-3 were considered negative and 4-9,positive.

### **Statistical analysis of pathological features**

All data were expressed as means  $\pm$  standard error of the mean (SEM) obtained from at least three independent experiments. Statistical comparisons between experimental and control groups were assessed by using the Student's t-test.  $P < 0.05$  was considered statistically significant.

### **Real-time RT-PCR assay**

Quantitative RT-PCR was used to validate the network results. Total RNA from 104 paired gastric cancer and adjacent tissues was treated with DNaseI (Sigma, St Louis, MO, USA) to eliminate any genomic DNA contamination. Reverse transcription for mRNAs was performed using M-MLV Reverse Transcriptase (Takara, Japan). The cDNA template was amplified by real-time RT-PCR using the SYBR Green Master Mix (Roche, USA). Primers were designed using Primer Premier 5.0 software. Real-time RT-PCR reactions were performed in triplicate on the ABI7500 system (Applied Biosystems, CA, USA).

Using the comparative Ct method  $2^{-\Delta\Delta Ct}$ , and gastric carcinoma sample No. 99 as a calibrator, the relative expression levels in all gastric carcinoma samples and adjacent non-tumorous tissues were quantified. Expression levels of mRNA were normalized to  $\beta$ -actin mRNA expression.

## **Lentiviral Transduction and Establishment of Stable Cell Lines**

The lentiviruses containing GKN2(GKN2-LV) for overexpressing and control (ctrl-LV) were purchased from Genechem Co., Ltd. (Shanghai, China). The targeting sequences are GKN2-LV (5'-

```
ATGAAAATACTTGTGGCATTCTGGTGGTGCTGACCATCTTTGGGATACAATCTCAT
GGATACGAGGTTTTTAACATCATCAGCCCAAGCAACAATGGTGGCAATGTTTCAGGA
GACAGTGACAATTGATAATGAAAAAATACCGCCATCATTAACATCCATGCAGGAT
CATGCTCTTCTACCACAATTTTGGACTATAAACATGGCTACATTGCATCCAGGGTGCT
CTCCCGAAGAGCCTGCTTTATCCTGAAGATGGACCATCAGAACATCCCTCCTCTGAA
CAATCTCCAATGGTACATCTATGAGAAACAGGCTCTGGACAACATGTTCTCCAGCAA
ATACACCTGGGTCAAGTACAACCCTCTGGAGTCTCTGATCAAAGACGTGGATTGGTT
CCTGCTTGGGTCACCCATTGAGAACTCTGCAAACATATCCCTTTGTATAAGGGGGA
AGTGGTTGAAAACACACATAATGTCGGTGCTGGAGGCTGTGCAAAGGCTGGGCTCC
TGGGCATCTTGGGAATTTCAATCTGTGCAGACATTCATGTT-3'). All the transfection
```

experiments were performed according to the manufacturer's instructions. GKN2-LV was transduced into AGS cells at a multiplicity of infection (MOI) of 100 and 10 respectively. Polybrene (Genechem, Shanghai, China) was added in each well at a final concentration of 10 µg/mL to enhance infection solution. The effects of gene interference on GKN2 overexpression were validated using RT-qPCR and Western blotting.

## **Cellular fractionation and western blotting (WB)**

Protein extracts (35 µg) from the different groups of gastric cancer cells were loaded onto 8–12% SDS-PAGE gel (Beyotime), then subjected to electrophoresis for 90 min at 100 V and transferred to NC membranes. The membranes were blocked and incubated with primary antibodies overnight at 4°C, followed by washing and incubation with horseradish peroxidase (HRP)-conjugated secondary antibodies. Immunoreactive bands were visualized by enhanced chemiluminescence (ECL, Thermo) and exposed to x-ray film. Relative protein expression was determined by image analysis using ChemiDoc™ XRS gel imaging system(Bio-Rad,USA).

The primary antibodies used were anti-GKN2,anti-GKN1,anti-PCNA,anti-Survivin, anti-BCL-2,anti-MMP7,anti-MMP9,anti-Timp2,anti-MMP2,Anti-PI3K,anti-p-PI3K,anti-AKT,anti-p-AKT,anti-PTEN,anti-mTOR,anti-p-JAK2,anti-p-STAT3,anti-p-STAT5,anti-ERK,anti-p-erk,anti-MEK,anti-p-mek,anti-GAPDH,anti-β-actin(Cell Signaling Technology, USA 1:1000).The secondary antibodies were anti-rabbit and anti-mouse HRP-conjugated IgG (Cell Signaling Technology, USA 1:3000).

## **Cell viability assay using the xCELLigence Real Time Cell Analyzer (RTCA)**

Optimal seeding concentration for proliferation of AGS was determined. AGS cells (5000 cell in 100 µL medium/well) were seeded in 16 well plates (E-plate 16 ACEA Biosciences Inc, San Diego USA) following the xCELLigence Real Time Cell Analyzer (RTCA) DP instrument manual as provided by the manufacturer. Baseline cell index were calculated for at least two

measurements from three replicate experiments. Cell proliferation was monitored for another 72 h.

### **Measurement of colony formation**

To measure the proliferative ability of a single cell in vitro, Plate colony formation assay was performed. Log phase cells were plated into 6-well plates at a density of 500 cells/well and cultured in 90%F12+10%FBS for 2 weeks to allow colony formation. Colonies were fixed in 1% formaldehyde and stained with 0.5% crystal violet solution. Colony number was calculated by Image J software and imaged.

### **Cell migration and invasion assay**

Invasion assays were performed using transwell chamber with a pore size of 8  $\mu$ m (Corning, New York, NY, USA). Plates were coated with Matrigel prior to cell seeding. The upper chamber was filled with  $5 \times 10^5$  AGS cells in F12 containing 0.1 % fetal bovine serum. And, F12 containing 10 % fetal bovine serum was added to the lower chamber. The membrane was photographed, and numbers of invading to lower chamber through the Matrigel were quantified from five randomly selected microscopic fields per membrane. The migration assay was carried using a similar system without adding Matrigel.

### **RNA preparation for mRNA-Seq**

Total RNA was extracted using RNAiso Plus Total RNA extraction reagent (Cat#9109, TAKARA) following the manufacturer's instructions and checked for a RIN number to inspect RNA integrity by an Agilent Bioanalyzer 2100 (Agilent technologies, Santa Clara, CA, US).Qualified total RNA was further purified by RNAClean XP Kit (Cat A63987, Beckman Coulter,Inc.Kraemer Boulevard Brea, CA,USA)and RNase-Free DNase Set (Cat#79254, QIAGEN, GmbH, Germany).

### **Library construction and sequencing**

The rRNA-depleted and RNA-fragmented libraries were constructed with sequential first- and second-strand cDNA synthesis, followed by end repair, adenylation of the 3' ends, ligation of adapters, and enrichment of the cDNA templates, according to experimental instructions. The quality and quantity of each libraries were determined with a Qubit® 2.0 Fluorometer (Life Technologies, USA) and Agilent Bioanalyzer 2100(Agilent Technologies, USA), respectively. The constructed library was sequenced using the Illumina HiSeq™ 2500 System (Illumina, USA) by Shanghai Biotechnology Corporation (Shanghai, China)

## Supporting Results

### *NEB mutations as an up-stream regulator of Epithelial-Mesenchymal Transition (EMT) pathways*

Notably, the up-regulated SMGs of *NEB* were highly enriched in the top ranked modules including M28, M226 (a daughter module of M28), M121 (the parent module of M437 and the top module M666) and M475 (**Supporting Material 2B**). M28 was involved in phospholipid metabolism and upregulated in tumor, as previously described. M121 and M475 were associated with biological oxidations (FET  $p=4.18E-7$ , 9.69 FE) and apoptotic cleavage of cellular proteins (FET  $p=2.65E-6$ , 22.7 FE), respectively.

Particularly, we identified key regulators of epithelial specific splicing in these modules, *ESRP1* in M28 and *ESRP2* (a top driver of M475). *ESRP1* and *ESRP2* orchestrate coordinated changes in epithelial alternative splicing, and are known to be abrogated during the epithelial-mesenchymal transition (EMT)<sup>5</sup>. In TCGA-GCC, *ESRP1* and *ESRP2* were significantly up-regulated in the *NEB* mutants by 1.23-fold (t-test  $p=1.13E-2$ ,) and 2.15-fold (t-test  $p=9.95E-5$ ), respectively. The *ESRP1-ESRP2* centered network was validated by the significant enrichment of the signature of the double knock-down of *ESRP1* and *ESRP2* from PNT cells<sup>5</sup> (the details of the analysis can be found in the subsection of *in-silico validation of gene-gene interactions* and *Extraction of gene perturbation signatures* in Materials and Methods). For example, the genes up-regulated by the double knock-down of *ESRP1* and *ESRP2* were enriched in the 5-layer neighborhood of *ESRP1* (FET  $p=5.54E-6$ , 1.74 FE) and in the 3-layer neighborhood of *ESRP2* (FET  $p=2.45E-7$ , 3.15 FE). The *ESRP1* and *ESRP2* centered networks were also associated with differential isoform expressions. By segregating primary tumor samples into high- and low-*ESRP1/2* expression groups by medians, we performed differential expression analysis on isoforms and then projected these isoform signatures onto the respective genes in the *ESRP1* and *ESRP2* centered networks. The up-regulated isoform signatures were highly enriched in the 5-layer neighborhood of *ESRP1* (FET  $p=4.01E-39$ , 4.38 FE) and the 3-layer neighborhood of *ESRP2* (FET  $p=1.33E-65$ , 5.20 FE). Such striking overlap strongly validated *ESRP1/2*-driven epithelial splicing pathways in the GC co-expression network.

On the other hand, the SMGs down-regulated by *NEB* are enriched in an EMT associated module M109 (FET  $p$ -value= $5.39E-126$ , 4.38 FE; **Supporting Figure 4B**). M109 is associated with key EMT pathways such as focal adhesion (FET  $p=9.01E-9$ , 3.85 FE), cytoskeletal protein binding (FET  $p=9.56E-7$ , 3.71 FE) and integrin (FET  $p=2.55E-5$ , 6.45 FE). *ZEB1*, a hub node in M109 (**Supporting Figure 4B**), is a transcription factor that promotes tumor invasion and metastasis by inducing epithelial-mesenchymal transition (EMT) in carcinoma cells<sup>6</sup>.

Overall, these results strongly suggest that *NEB* somatic mutations play protective roles by targeting key dys-regulated pathways contributing to GC invasiveness such as phospholipid metabolism, biological oxidations, apoptosis and EMT.

### *GKN2 over-expression inhibits proliferation and invasion of gastric cancer cells*

The effect of *GKN2* over-expression on gastric cancer cell viability was investigated by RTCA and colony formation assays (see *Cell viability assay using the xCELLigence Real Time Cell Analyzer* in **Supporting Materials and Methods**). As depicted in **Supporting Figure 8A,C**, the

viability of AGS\_GKN2 was reduced and was significantly lower than AGS\_CON ( $P < 0.05$ ) by RTCA assays. Between 24 and 96 h after the transfection, AGS\_GKN2 did not grow at all, while AGS\_CON cells were proliferative (**Supporting Figure 8B,D**). Thus, the colony formation ability of AGS\_GKN2 cells was dramatically increased compared with that of AGS\_CON ( $P < 0.05$ ). These results indicated that GKN2 had an anti-oncogenic role in the GC cells. To further determine impact of GKN2 on cell growth, a series of genes related to proliferation were analyzed. Western blot analyses of AGS\_GKN2 showed that PCNA, Survivin and Bcl-2, proliferation marker genes, were significantly down-regulated and it suggests GKN2 controls cell growth through regulating activation of these genes (**Supporting Figure 8E**).

Changes in cell migration and invasion after GKN2 transfection were measured using transwell assays (see *Cell migration and invasion assay* in **Supporting Materials and Methods**). Both migration and invasion assays indicated that overexpression of GKN2 significantly reduced the number of AGS cells in the lower chamber (**Supporting Figure 9A-D**). In view of the important role of the matrix metalloproteinase (MMP) family in the invasion and metastasis of cancer, we detected the protein levels of MMP2/7/9 and Timp2 in gastric cancer cell. Compared with the control, both the expression level of MMP2, MMP7 and MMP9 were downregulated significantly in GKN2-transfected cancer cells and Timp2 were dramatically upregulated inversely (**Supporting Figure 9E**).

### ***GKN2 suppresses the oncogenic PTEN/PI3K/AKT/mTOR and JAK/STAT pathways***

We identified that over-expression of GKN2 significantly downregulated the protein expressions of p-PI3K, AKT, p-AKT and mTOR, and upregulated negative regulatory factor PTEN in GKN2-transfected AGS by western blot analyses (**Supporting Figure 10A**). Furthermore, we observed common inhibition of p-JAK2, and cell line specific inhibition of p-STAT3 and p-STAT5. Specifically, p-STAT3 inhibition was observed only in AGS cells (**Supporting Figure 10B**).

### ***Global epigenetic alterations functionally impact key pathways in gastric cancer progression***

We systematically evaluated epigenetic impact on gastric cancer transcriptome by analyzing correlations between gene expression and DNA methylation changes at CpG sites in *cis* and *trans* (**Supporting Materials and Methods**). This analysis yielded a large number of *cis*-/*trans*-methylation genes (*cis*-/*trans*-eMSGs) including 4,004 negative *cis*-eMSGs, 1,529 positive *cis*-eMSGs, 8,266 negative *trans*-eMSGs, and 7,352 positive *trans*-eMSGs. These eMSG signatures were tested for enrichment in the MEGENA derived modules so as to identify epigenetic regulation of these gene modules (**Supporting Material 6A** for gene signature lists, **Supporting Material 6C** for module enrichments).

The enriched MSigDB signatures in the eMSGs suggested that methylations indeed impacted diverse known pathways and functions driving tumorigenesis in gastric cancer. Negative *cis*-eMSGs were strongly associated with signal transduction (FET  $p=2.09E-43$ , 1.86 FE), hallmark allograft rejection (FET  $p=1.48E-34$ , 3.48 FE) and anatomical structure development (FET

1 p=9.65E-24, 1.80 FE). Positive cis-meSCGs were enriched for similar pathways including  
2 membrane (FET p= 6.04E-27, 2.06 FE), anatomical structure development (FET p=2.5E-24,  
3 2.48 FE) and signal transduction (FET p=1.20E-13, 1.79 FE). Negatively correlated trans-  
4 meSCGs was significantly enriched for cell cycle associated functions such as hallmark E2F  
5 targets (FET p= 8.53E-36, 2.38 FE) and hallmark G2M checkpoint (FET p= 7.64E-21, 2.03 FE),  
6 epithelial-mesenchymal transition associated pathways such as hallmark epithelial-mesenchymal  
7 transition (FET p= 6.78E-28, 2.21 FE), and immune response pathways such as immune system  
8 process (FET p= 1.92E-25, 1.90 FE). Lastly, positive trans-meSCGs were also enriched for  
9 hallmark E2F targets (FET p=1.44E-35, 2.53 FE), hallmark epithelial-mesenchymal transition  
10 (FET p= 2.00E-17, 2.03 FE) and immune system process (FET p= 8.66E-25, 1.98 FE) (see  
11 **Supporting Material 6B** for details).

12

## Supporting Tables

| <b>Survival</b>                  |                                |                                       |                                  |
|----------------------------------|--------------------------------|---------------------------------------|----------------------------------|
| <i>overall followup (days)</i>   | <i>overall survival</i>        | <i>recurrence-free followup(days)</i> | <i>recurrence</i>                |
| Min. : 0.0                       | alive: 238                     | Min. : 0.00                           | no event: 170                    |
| 1st Qu.: 6.0                     | death: 57                      | 1st Qu.: 16.75                        | recurred: 31                     |
| Median : 242.0                   |                                | Median : 347.50                       |                                  |
| Mean : 293.8                     |                                | Mean : 310.66                         |                                  |
| 3rd Qu.: 445.0                   |                                | 3rd Qu.: 462.25                       |                                  |
| Max. : 3196.0                    |                                | Max. : 2405.00                        |                                  |
| <b>Histological Subtype</b>      |                                |                                       |                                  |
| <i>Lauren Classification</i>     | <i>Signet Ring</i>             | <i>WHO Classification</i>             | <i>Neoplasm histologic grade</i> |
| Diffuse : 69                     | NO : 47                        | Mixed : 19                            | G1 : 4                           |
| Intestinal:196                   | YES : 22                       | Mucinous : 18                         | G2 : 72                          |
| Mixed : 19                       |                                | Papillary : 22                        | G3 :146                          |
|                                  |                                | Poorly_Cohesive: 69                   |                                  |
|                                  |                                | Tubular :140                          |                                  |
| <b>Pathologic Classification</b> |                                |                                       |                                  |
| <i>Pathologic T</i>              | <i>Pathologic N</i>            | <i>Pathologic M</i>                   | <i>TNM Stage</i>                 |
| T3 :155                          | N0 :97                         | M0 :273                               | Stage_IIB :60                    |
| T4a : 60                         | N1 :64                         | M1 : 20                               | Stage_IIIB:57                    |
| T2 : 44                          | N2 :58                         |                                       | Stage_IIA :56                    |
| T4b : 14                         | N3 :65                         |                                       | Stage_IIIA:40                    |
| T1b : 10                         |                                |                                       | Stage_IB :24                     |
| (Other): 2                       |                                |                                       | Stage_IV :20                     |
|                                  |                                |                                       | (Other) :38                      |
| <b>Other classifications</b>     |                                |                                       |                                  |
| <i>Anatomic Region</i>           | <i>TCGA: Molecular Subtype</i> | <i>TCGA: MSI status</i>               |                                  |
| ANTRUM :114                      | CIN:147                        | MSI-H: 64                             |                                  |
| FUNDUS_BODY:116                  | EBV: 26                        | MSI-L: 44                             |                                  |
| GEJ_CARDIA : 57                  | GS : 58                        | MSS :187                              |                                  |
|                                  | MSI: 64                        |                                       |                                  |

**Supporting Table 1.** Summary table of clinical features used in the analysis from TCGA gastric cancer data.

1

| Pathological Features          | Mean (log10RQ) | Range        | P value      |
|--------------------------------|----------------|--------------|--------------|
| <b>Sex</b>                     |                |              |              |
| <60                            | 0.3218         | -2.990~3.228 | 0.434        |
| >60                            | 0.571          | -2.712~3.116 |              |
| <b>Lauren's type</b>           |                |              |              |
| Intestinal                     | 0.525          | -2.296~3.116 | 0.665        |
| Diffuse                        | 0.3901         | -2.990~3.228 |              |
| <b>Tumor size</b>              |                |              |              |
| <5cm                           | 0.746          | -2.990~3.228 | <b>0.023</b> |
| >5cm                           | 0.026          | -2.712~3.080 |              |
| <b>Location</b>                |                |              |              |
| EGJ(oesophagogastric junction) | -0.3206        | -2.520~2.361 | <b>0.006</b> |
| Non-EGJ                        | 0.6733         | -2.990~3.227 |              |
| <b>Depth of invasion</b>       |                |              |              |
| <T2                            | 0.947          | -1.862~3.228 | 0.201        |
| >T2                            | 0.354          | 2.990~3.080  |              |
| <b>Differentiation</b>         |                |              |              |
| moderate                       | 0.556          | -2.295~3.116 | 0.594        |
| poor                           | 0.376          | -2.990~3.228 |              |
| <b>TNM</b>                     |                |              |              |
| <III stage                     | 0.854          | -1.862~3.228 | <b>0.076</b> |
| >III stage                     | 0.248          | -2.990~3.080 |              |
| <b>Lymph node metastasis</b>   |                |              |              |
| absent                         | 0.63           | -2.296~3.228 | 0.479        |
| present                        | 0.37           | 2.990~3.116  |              |

2 <sup>a</sup> RQ=2<sup>-ΔΔCt</sup>

3 **Supporting Table 2.** Correlation between tumor GKN2 mRNA expression and pathological  
4 features of gastric carcinoma of Fujian cohort.

5

6

7

8

9

10

11

# 1 *Supporting Figures*

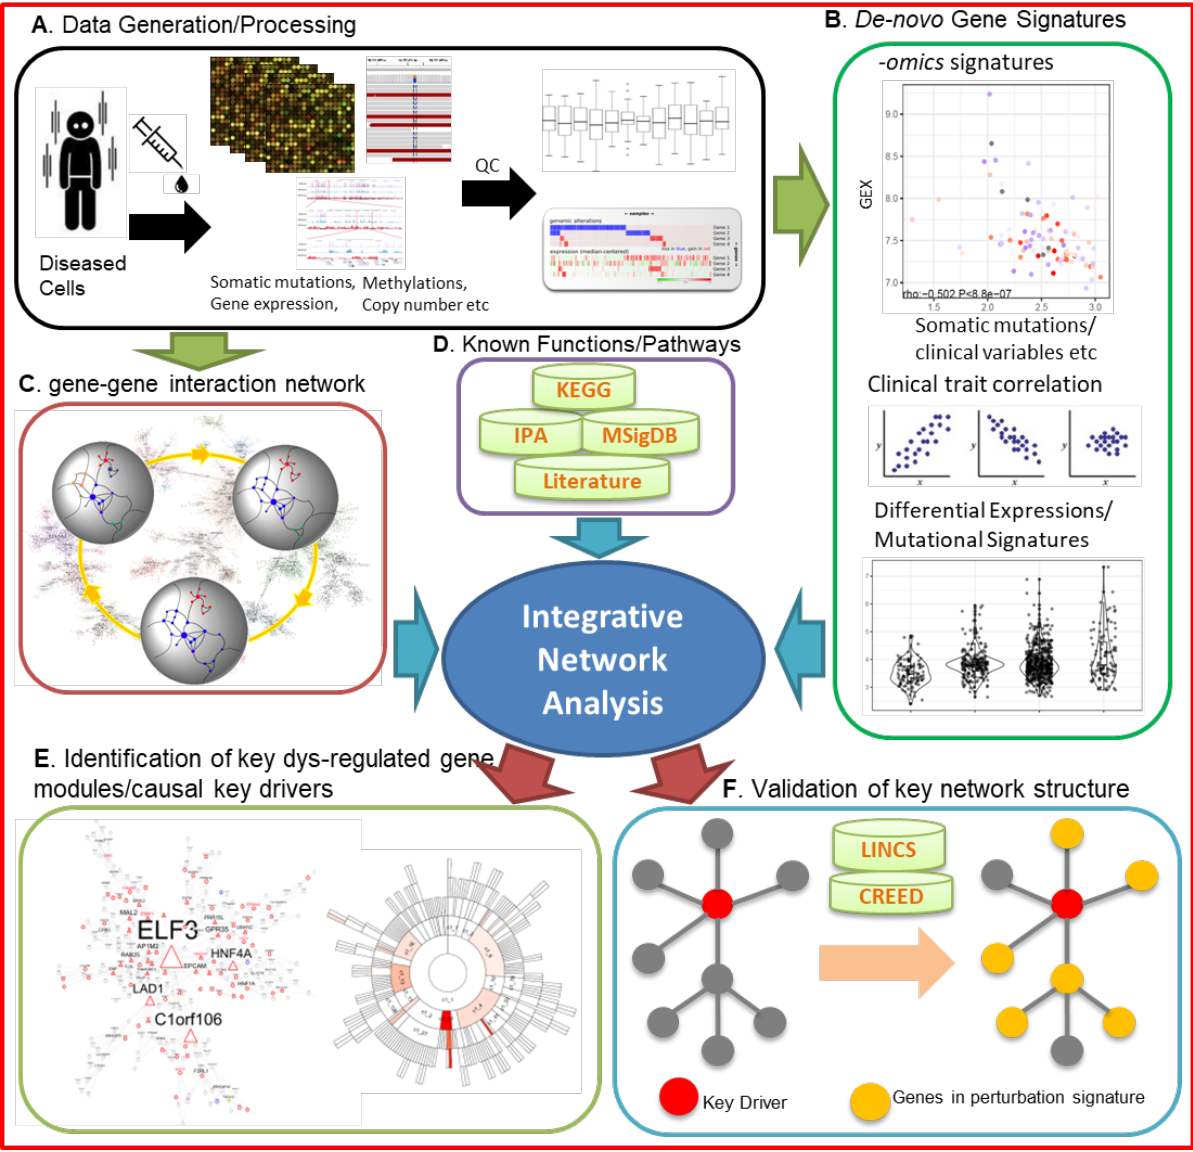

**Supporting Figure 1. Overview of integrative network analysis of TCGA gastric cancer cohort.** **A.** Data Generation/Processing: Illustration of multiple –omics data generations to capture molecular features of diseased cells. Quality Controls (QC) are performed to remove outliers and confounding effects. **B.** Gene Signatures: various gene signatures are extracted by associating gene expressions to clinical traits and somatic mutation status. **C.** Co-expression: MEGENA is applied to identify co-expression network from the primary tumor gene expression data. **D.** Known pathways: established gene signatures from public domain (for instance, MSigDB) are projected to co-expression modules to associate to enriched pathways. **E.** Identification of key dys-regulated gene modules: Enrichments of gene signatures are gathered to pin-point key dys-regulated gene modules. **F.** Validation of key network structure: Key hub genes from key gene modules are functionally validated by projecting gene perturbation signatures onto the neighborhood network structure.

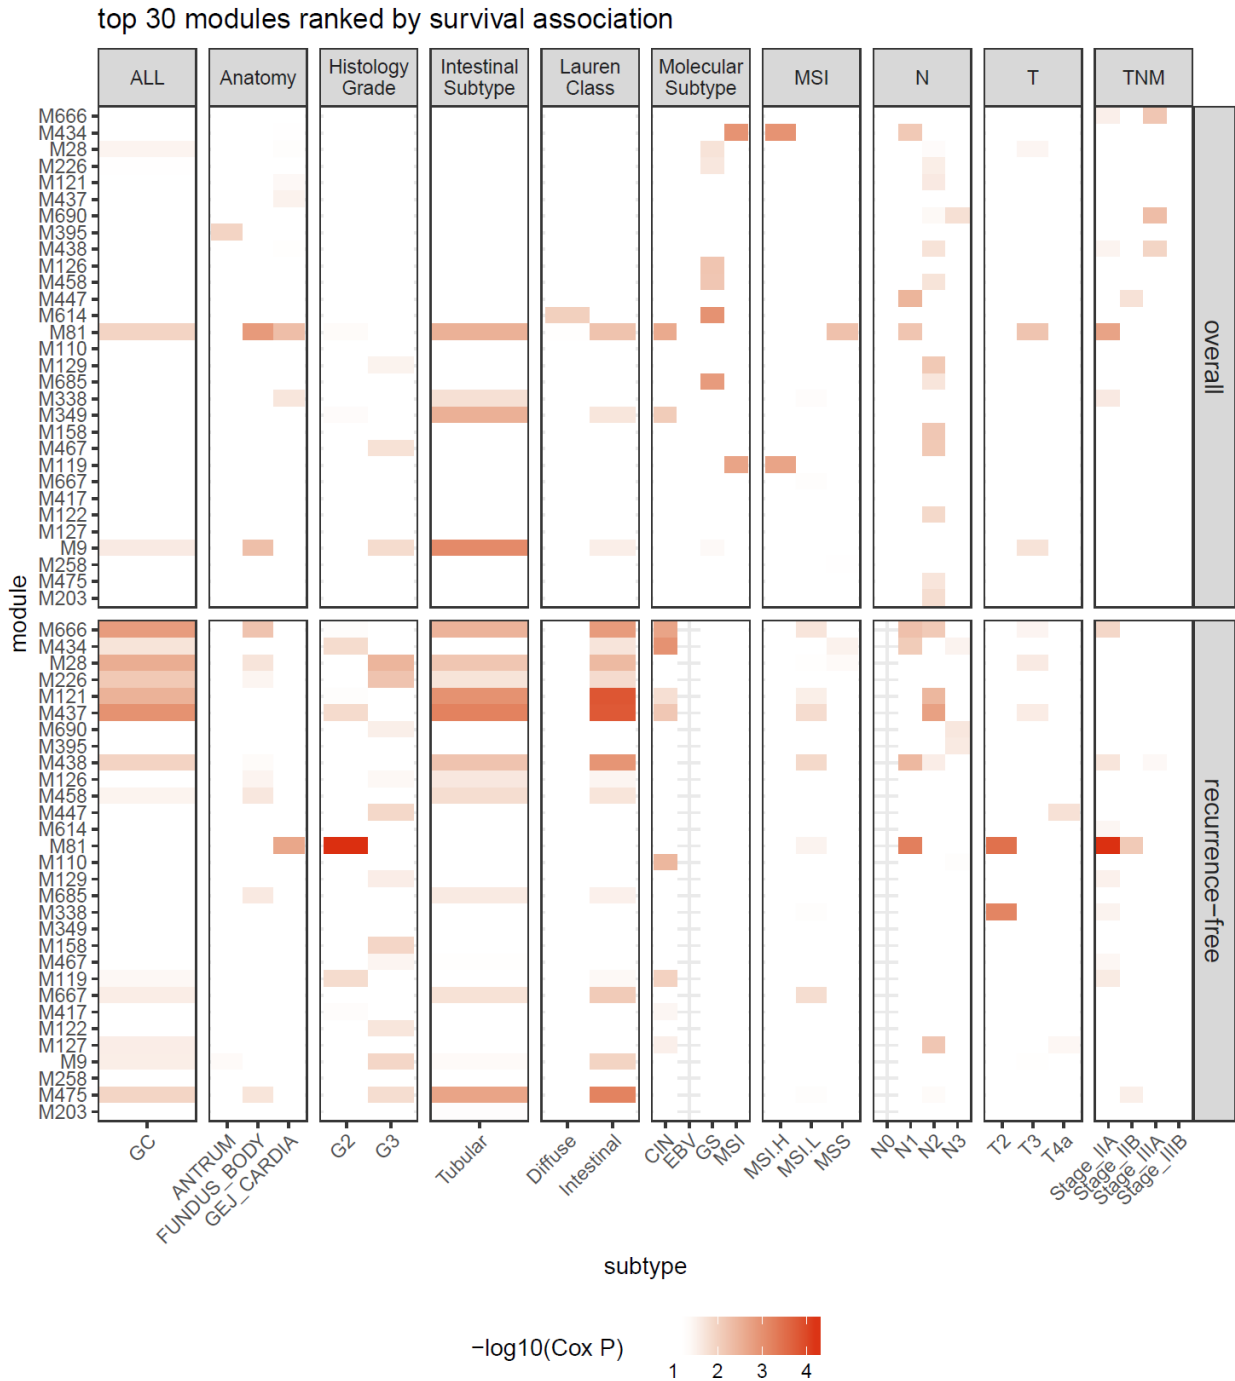

**Supporting Figure 2.** Heatmap of Cox p-values for overall (top) and recurrence-free (bottom) survival within various subtypes of gastric cancer for top 30 ranked modules.

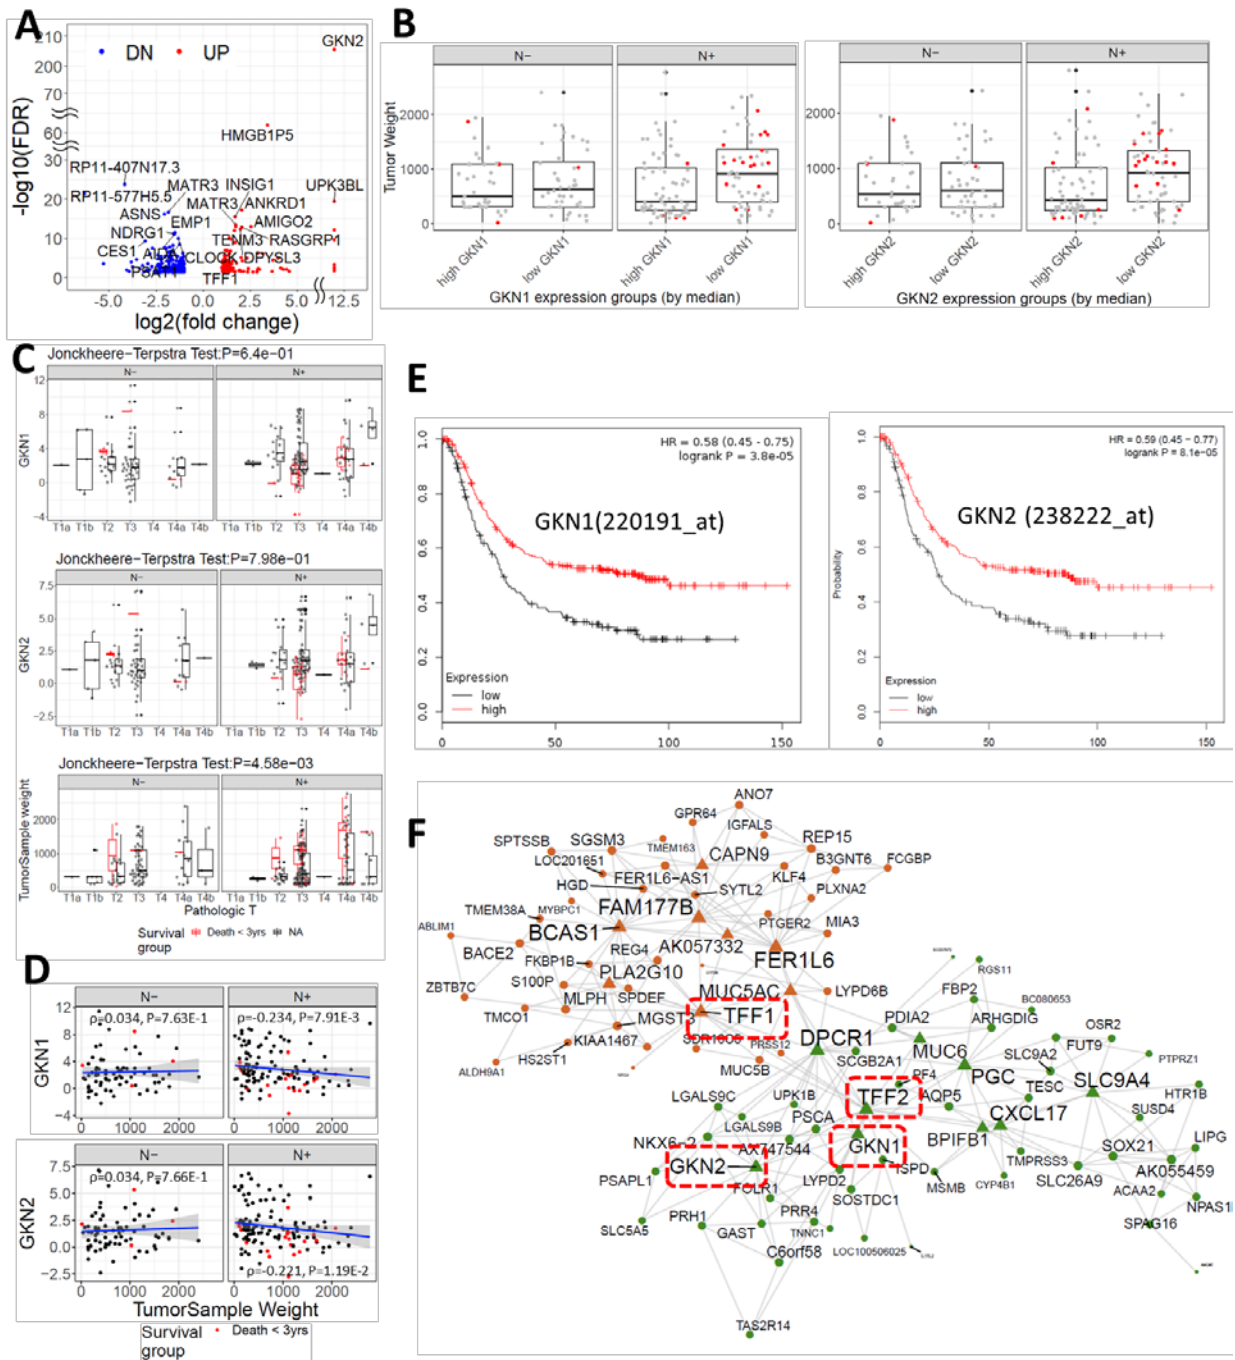

**Supporting Figure 3. Prognostic significance of *GKN1/2* in *TFF1-TFF2-GKN1-GKN2* axis.**

**A.** Significant differential expressions by fold change  $> 1.2$  or  $< 0.83$  and  $FDR < 0.05$  are highlighted. Top 10 most up-/down-regulated genes by *GKN2* over-expression in AGS cells (colored red/blue) are labeled. **B.** *GKN1/2* expression associates to tumor weights measured at resection (y-axis, in grams) within node-positive group. High-/low-expression groups were defined by the median expressions, and patients whose deaths were observed within 3-years of follow-up were marked by red dots as the poor prognosis group. Node-positive/-negative status is specified on the top of each subplot. **C.** Association between pathological tumor (T) stages and

1 *GKN1/GKN2*/tumor weight. The significance p-values were evaluated by non-parametric  
2 Jonckheere-Terpstra test. Patients with death within 3 years of follow-up are marked red. D.  
3 Correlation between *GKN1/GKN2* expressions and tumor sample weights. Significance p-values  
4 by Spearman's correlations are shown. **E.** Validation of prognostic significance of *GKN1/2* from  
5 independent microarray data sets from GEO<sup>7</sup>. **F.** Module M436 is directly connected to M434,  
6 and together constitutes *TFF1-TFF2-GKN1-GKN2* axis (highlighted in red boxes).

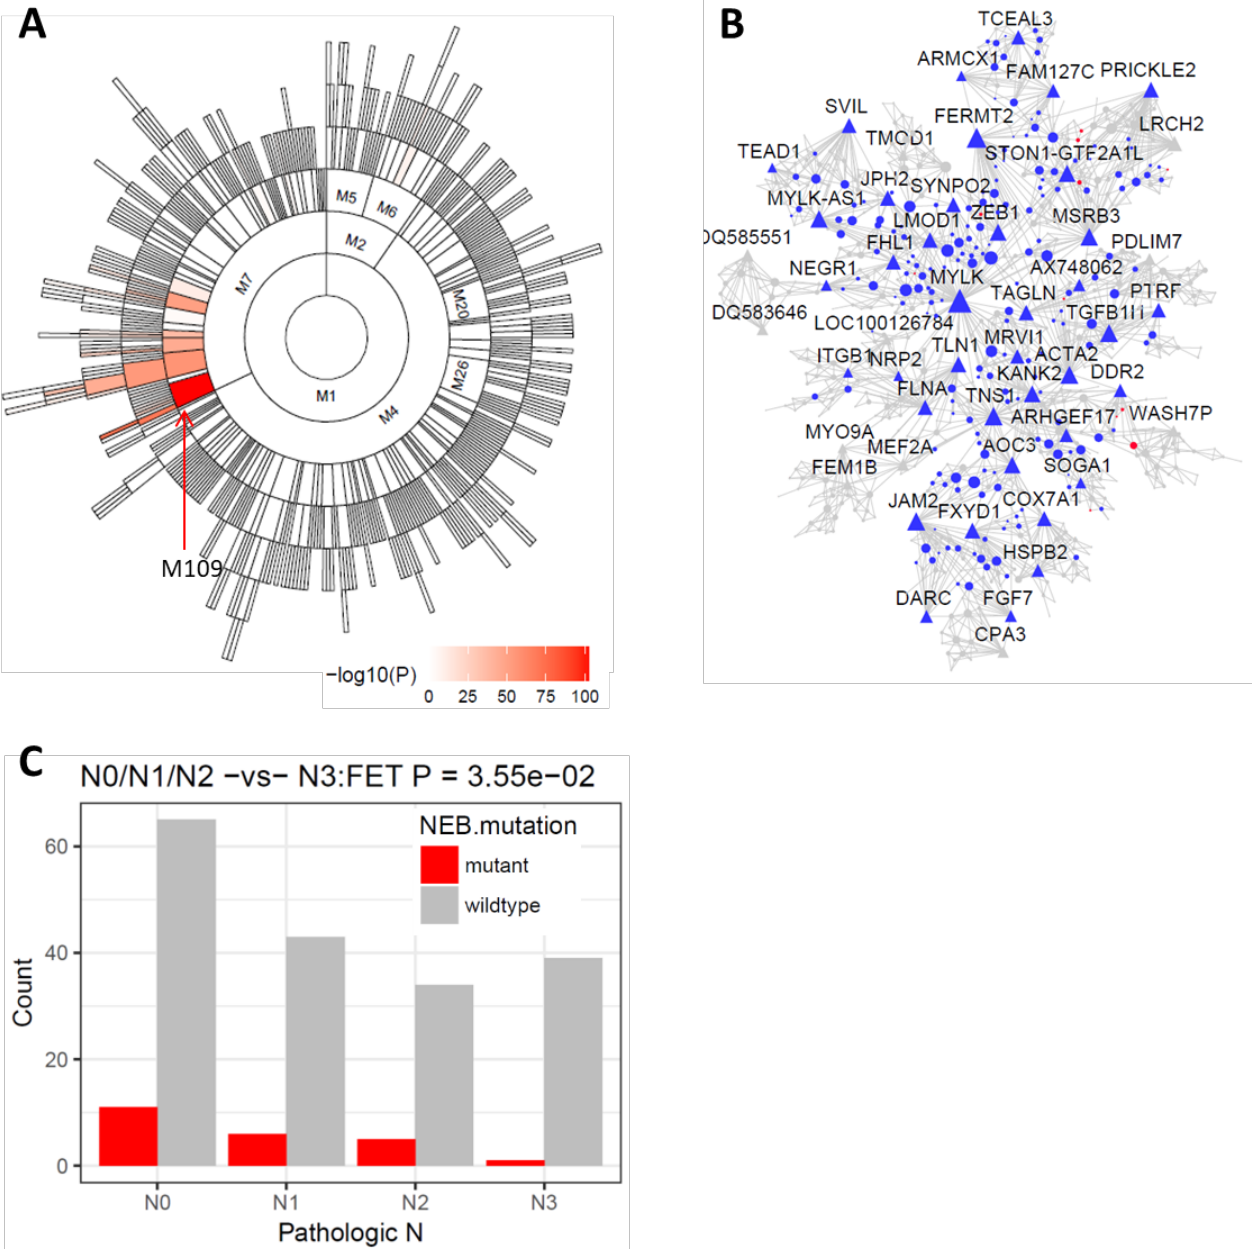

**Supporting Figure 4. Suppression of Epithelial-Mesenchymal Transition (EMT) in *NEB* mutant samples.** **A.** Sunburst plot illustrates enrichment of down-regulated SMGs by *NEB* mutation in hierarchically organized MEGENA modules. Red heatmap colors are proportional to  $-\log_{10}(\text{FET p-value})$  of the SMGs, as illustrated by the colorbar on the bottom. **B.** Visualization of the top enriched gene module, M109, by down-regulated SMGs by *NEB* mutation. Significant hub genes identified by MEGENA are labeled with respective gene symbols. **C.** Distribution of pathological node status in TCGA-GCC across *NEB* mutant and wildtype samples. The statistical significance of under-representation of N3 against the rest in *NEB* mutants is shown on the top.

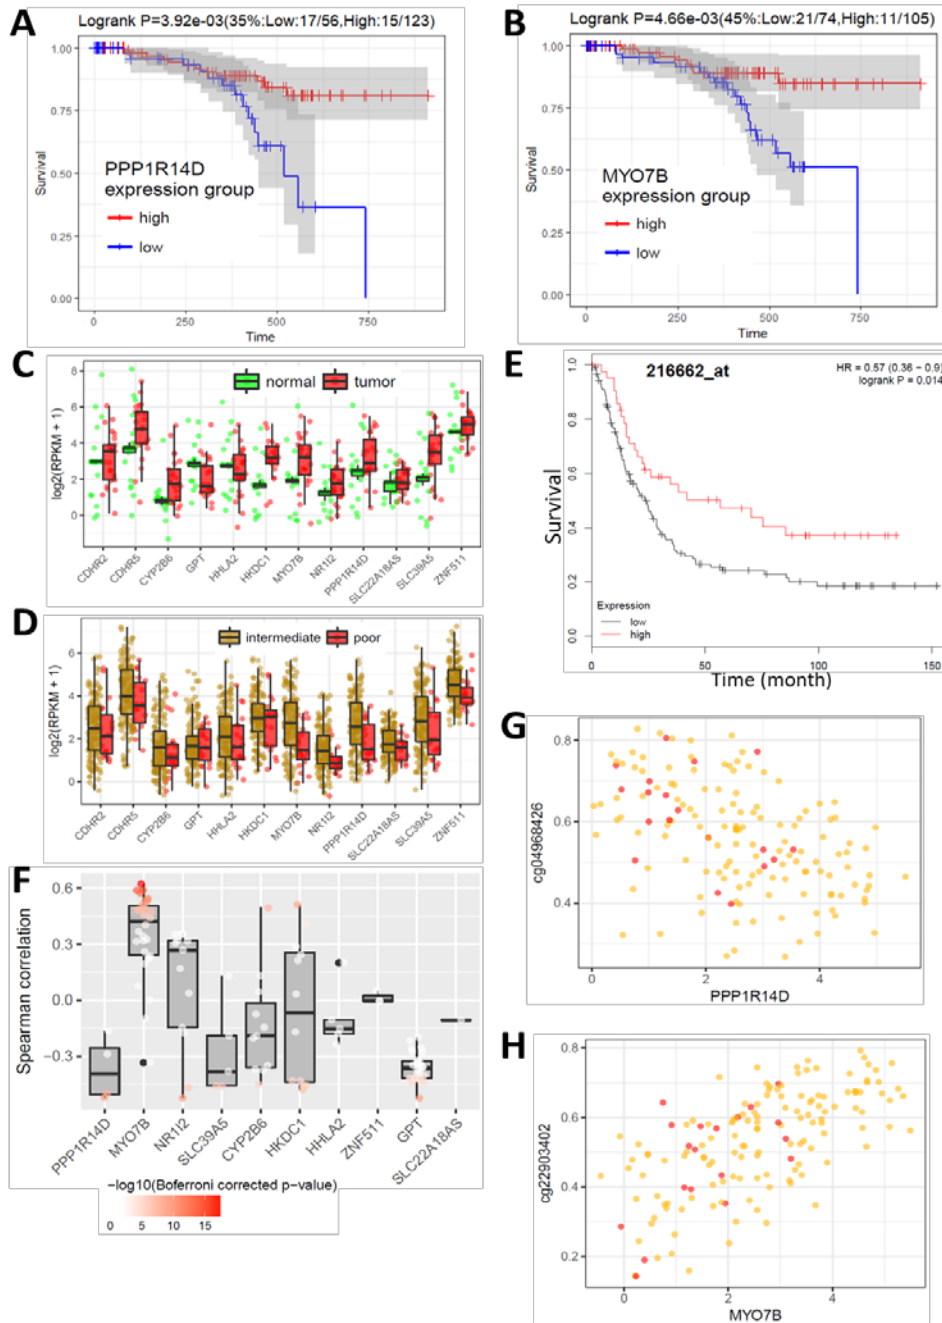

**Supporting Figure 5. Epigenetic regulations of the top ranked module M666 associates with poor prognosis.** A/B. Kaplan-Meier plots for overall survival of TCGA-GCC patients when segregated by *PPP1R14D*/*MYO7B* expressions in primary tumors. Quantile thresholds to define high and low expression groups, and respective logrank p-values and number of deceased/living patients in high and low expression groups (formatted as low: #. deceased/#. living, high: #. deceased/#. living) are shown at the top. C. Comparisons of gene expressions between adjacent normal and primary tumor samples of TCGA-GCC for key regulators of M666. D. Comparisons

1 of gene expressions between patients with poor recurrence-free outcomes (i.e. recurrence within  
2 3 years of follow up) and those with intermediate outcomes (i.e. recurrence-free survival  
3 observed between 3 and 5 years of follow up) tumor samples of TCGA-GCC for key driver  
4 genes of M666. **E.** Kaplan-Meier plot of node positive gastric cancer patients segregated by  
5 *MYO7B* expression from *km-plotter*. **F.** Correlations between gene expression and methylation  
6 at CpG sites of the promoter regions of the respective genes. Each point represents the Spearman  
7 correlation coefficient between the gene and a CpG site. Color intensity represents the  
8 Bonferroni corrected p-value of correlation. The boxplots summarize the correlation coefficient  
9 distributions. **G.** Scatter plot of *PPP1R14D* gene expression against methylation at the CpG site,  
10 cg04968426. Red and golden colors represent poor and intermediate recurrence-free outcome  
11 groups, respectively. Significance of survival difference between the group with high  
12 methylation and low expression and the group with low methylation and high expression is  
13 shown at the top with. **H.** Scatter plot of *MYO7B* gene expression against the methylation at the  
14 CpG site, cg22903402. . Red and golden colors represent poor and intermediate recurrence-free  
15 outcome groups, respectively. Similar to G, the significance of survival difference is shown at  
16 the top.

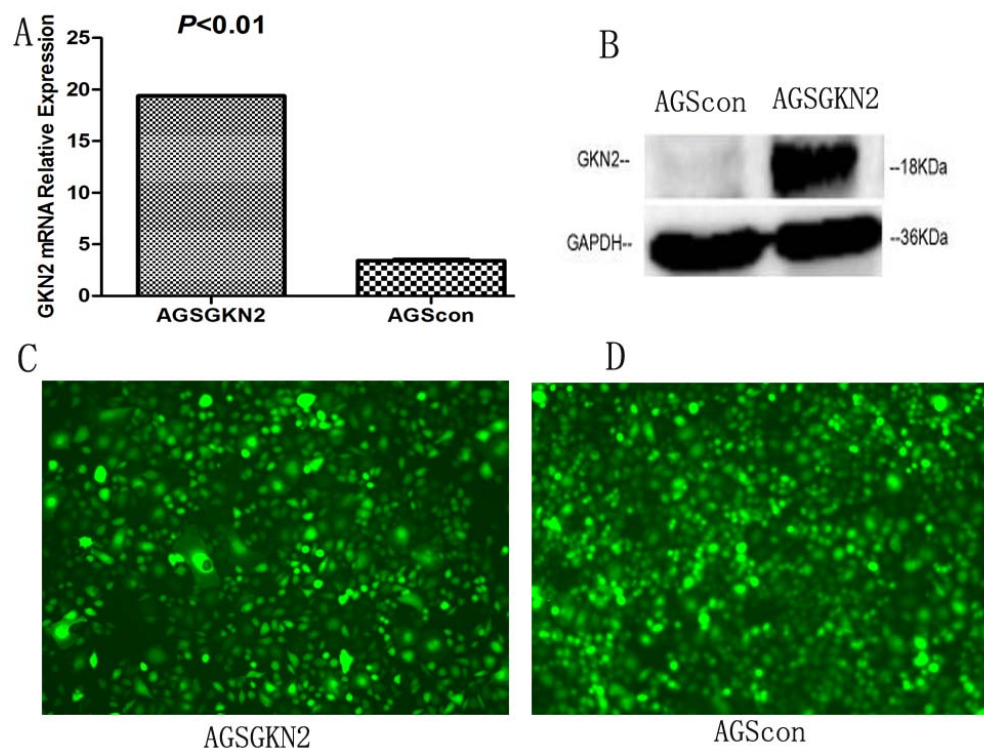

**Supporting Figure 6. Expression of *GKN2* in AGS after transfection with *GKN2*-LV and ctrl-LV at protein and mRNA levels. A:** mRNA expression of *GKN2* in AGS\_CON and AGS\_GKN2; **B:** Western blot of *GKN2* in AGS and AGS\_GKN2; **C:** AGS\_GKN2 cells; **D:** AGS\_CON cells ; \*\*denotes  $P < 0.05$

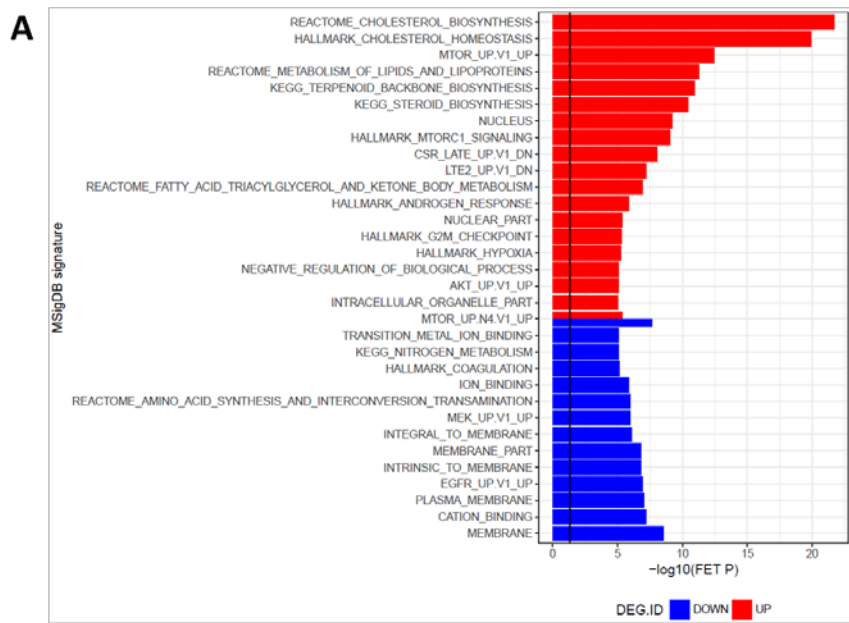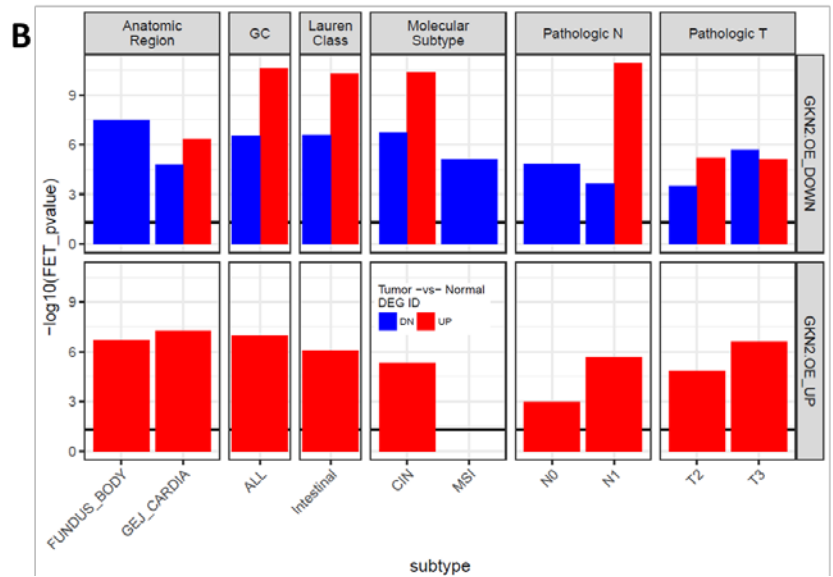

**Supporting Figure 7. Enrichments of *GKN2* over expression signatures from AGS cells. A.**

Enrichments of MSigDB signatures in differentially expressed genes by *GKN2* over-expression in AGS gastric cancer cells. The signatures were identified by Bonferroni corrected FET p-value  $< 0.05$ . Signatures enriched in up-regulated genes by *GKN2* over-expression (denoted as UP, colored red) are shown at the top, and those enriched in the down-regulated genes (denoted as DOWN, colored blue) are shown at the bottom. B. Enrichments of primary tumor -vs- adjacent normal tissue DEG signatures from various GC subtypes, with differentially expressed genes by *GKN2* over-expression in AGS gastric cancer cells. Up-/down-regulated signatures by *GKN2* over expressions are specified on the right strips in the subtype against  $-\log_{10}(\text{FET p-value})$  bar plots, and categories of the subtypes are specified on the top strips.

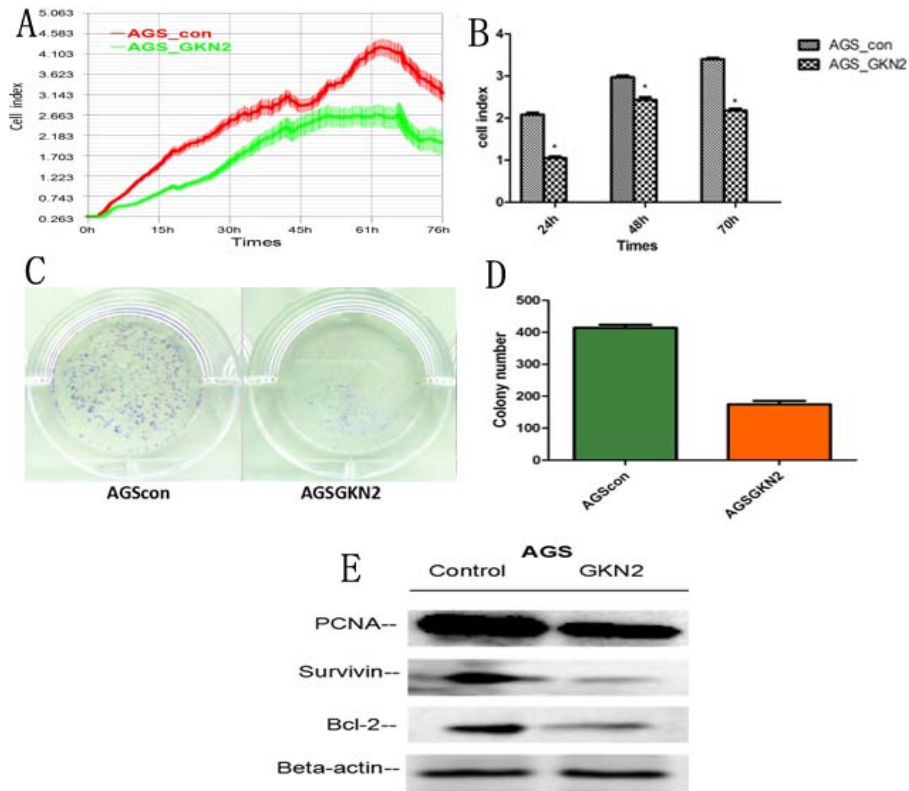

**Supporting Figure 8. Overexpression of *GKN2* inhibits proliferation of AGSs.** **A:** Cell viability was detected by xCELLigence real time cell proliferation system (RTCA) for 70h. **B:** *GKN2* significantly the proliferation of AGS than compared with that of AGS\_GKN2. **C:** *GKN2* overexpression group displayed a significant decrease in term of colony formation numbers. Thus, the colony formation ability of AGS\_GKN2 was significantly weaker than compared with that of control cells(D). \*:  $P < 0.05$ . **E.** Effects of *GKN2* on the expression of proliferation -related genes PCNA, Survivin and Bcl-2 were examined by western blotting. Beta-actin acted as the loading control.

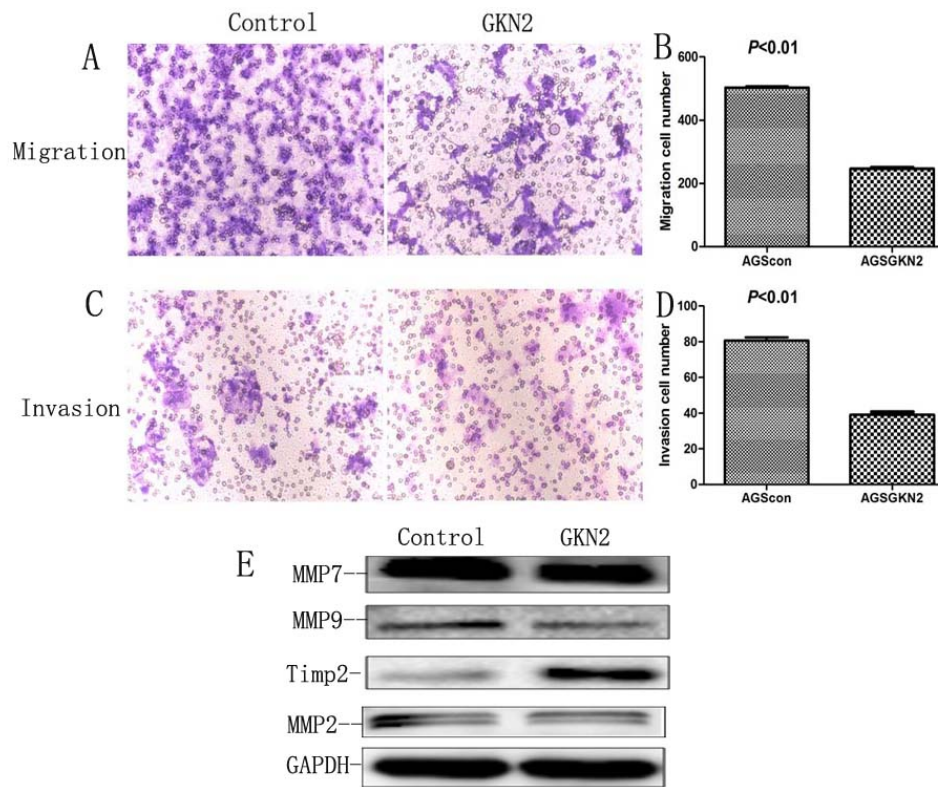

**Supporting Figure 9. Effects of *GKN2* on migration/invasion in AGS. A, B:** *GKN2* reduced cell migration compared with the control. **C, D:** *GKN2* reduced cell invasion compared with the control. **E:** Effects of *GKN2* on the expression of *MMP2/7/9* and *Timp2* in AGS. *MMP2/7/9* and *Timp2* were examined by western blotting. *GAPDH* acted as the loading control.

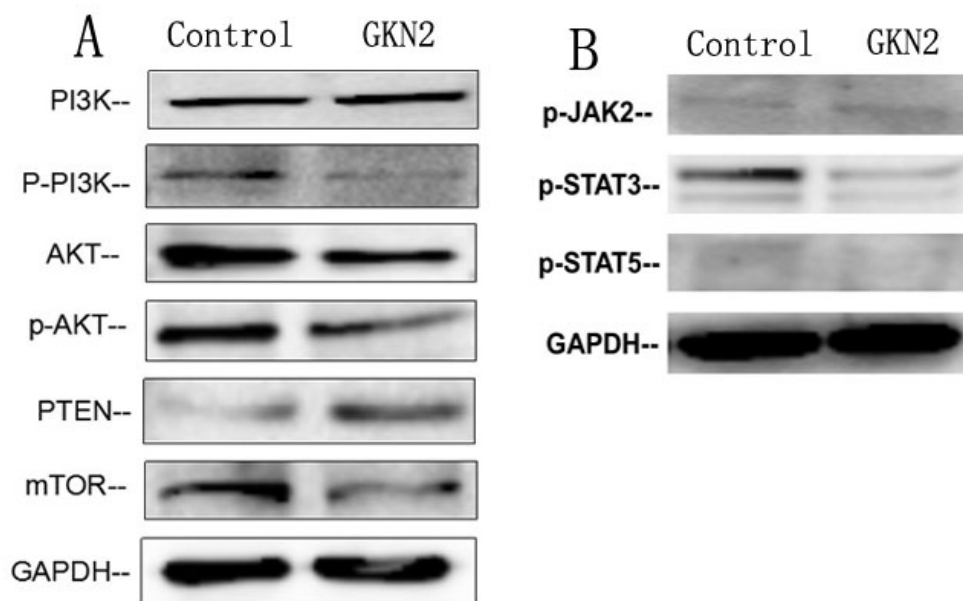

**Supporting Figure 10. Western blot analyses on GKN2-transfected AGS cell lines reveal impacts on oncogenic pathways of gastric cancer.** GAPDH acted as the loading control. **A.** Effects of GKN2 on protein markers of the PTEN/PI3K/AKT/mTOR pathway in AGS. Protein indicators related to the PTEN/PI3K/AKT/mTOR pathway, PI3K, p-PI3K, AKT, p-AKT, mTOR and PTEN were examined by western blotting. **B.** Effects of GKN2 on protein markers of the JAK/STAT pathway in AGS. Protein indicators related to the JAK/STAT pathway, p-JAK2, p-STAT3 and p-STAT5 were examined by western blotting. GAPDH acted as the loading control.

## References

- 1 Song, W. M. & Zhang, B. Multiscale Embedded Gene Co-expression Network Analysis. *PLoS Comput Biol* **11**, e1004574, doi:10.1371/journal.pcbi.1004574 (2015).
- 2 Mayakonda, A., Koeffler, P. H. Maftools: Efficient analysis, visualization and summarization of MAF files from large-scale cohort based cancer studies. *BioRxiv*, doi:<http://dx.doi.org/10.1101/052662> (2016).
- 3 Cancer Genome Atlas Research, N. Comprehensive molecular characterization of gastric adenocarcinoma. *Nature* **513**, 202-209, doi:10.1038/nature13480 (2014).
- 4 McCarthy, D. J., Chen, Y. & Smyth, G. K. Differential expression analysis of multifactor RNA-Seq experiments with respect to biological variation. *Nucleic acids research* **40**, 4288-4297, doi:10.1093/nar/gks042 (2012).
- 5 Warzecha, C. C., Shen, S., Xing, Y. & Carstens, R. P. The epithelial splicing factors ESRP1 and ESRP2 positively and negatively regulate diverse types of alternative splicing events. *RNA biology* **6**, 546-562 (2009).

- 1 6 Zhang, P., Sun, Y. & Ma, L. ZEB1: at the crossroads of epithelial-mesenchymal transition,  
2 metastasis and therapy resistance. *Cell cycle* **14**, 481-487, doi:10.1080/15384101.2015.1006048  
3 (2015).  
4 7 Szasz, A. M. *et al.* Cross-validation of survival associated biomarkers in gastric cancer using  
5 transcriptomic data of 1,065 patients. *Oncotarget* **7**, 49322-49333,  
6 doi:10.18632/oncotarget.10337 (2016).

7

Supporting Material 2A: Module Summary Table

|    | module | module.parent | module.size | top10_keydrivers                                                                   | top10_hubs(connectivity)                                                                             | GO_KEGG                                                             | Subtype.Signature                                       | Tumor_vs_Normal.Signature                         |
|----|--------|---------------|-------------|------------------------------------------------------------------------------------|------------------------------------------------------------------------------------------------------|---------------------------------------------------------------------|---------------------------------------------------------|---------------------------------------------------|
| 1  | M666   | M438          | 52          | PPP1R14D,NR1I2,CDHR2,MYO7B,SLC22A18AS,CDHR5,HHLA2,SLC39A5,GPT,ZNF511               | PPP1R14D(24)                                                                                         | KEGG_ARACHIDONIC_ACID_METABOLISM                                    | DEG-subtype.Molecular.Subtype__CIN_vs_EBV__UP           | DEG-TumorNormal.Molecular.Subtype__CIN__UP        |
| 2  | M434   | M119          | 56          | TFF2,PGC,DPCR1,CXCL17,GKN1,BPIFB1,MUC6,GKN2,SLC9A4                                 | ()                                                                                                   | DIGESTION                                                           | DEG-subtype.Molecular.Subtype__CIN_vs_EBV__UP           | DEG-TumorNormal.neoplasm_histologic_grade__G3__DN |
| 3  | M28    | M4            | 244         | ELF3,EPCAM,LAD1,HNF4A,AP1M2,GPR35,C1orf106,PRR15L,CAMSAP3,MAL2                     | ELF3(44),C1orf106(32),HNF4A(27),LAD1(27),GPR35(20),MAL2(19),AP1M2(19),EPCAM(18),RAB25(17)            | KEGG_TIGHT_JUNCTION                                                 | DEG-subtype.Lauren.Class__Diffuse_vs_Mixed__DN          | DEG-TumorNormal.neoplasm_histologic_grade__G2__UP |
| 4  | M226   | M28           | 223         | ELF3,EPCAM,LAD1,AP1M2,GPR35,HNF4A,PRR15L,C1orf106,MAL2,RAB25                       | ELF3(44),C1orf106(32),HNF4A(27),LAD1(27),GPR35(20),MAL2(19),AP1M2(19),EPCAM(18),RAB25(17)            | KEGG_TIGHT_JUNCTION                                                 | DEG-subtype.Lauren.Class__Diffuse_vs_Mixed__DN          | DEG-TumorNormal.neoplasm_histologic_grade__G2__UP |
| 5  | M121   | M7            | 194         | MYO7B,CDH17,MOGAT3,NR1I2,PPP1R14D,TMEM150B,CDX1,CYP2B6,GUCY2C,PHGR1                | MOGAT3(37),CDH17(30),PPP1R14D(28),CDX1(27),MYO7B(23),NR1I2(22),TMEM150B(21),PHGR1(20)                | MONOOXYGENASE_ACTIVITY                                              | DEG-subtype.Molecular.Subtype__EBV_vs_MSI__DN           | DEG-TumorNormal.neoplasm_histologic_grade__G2__UP |
| 6  | M437   | M121          | 76          | CDH17,CDX1,GUCY2C,PHGR1,GPA33,FAM84A,NOS2,CLDN3,AF086125,CDX2                      | CDX1(26),CDH17(23),PHGR1(19)                                                                         | REPRODUCTION                                                        | DEG-subtype.Molecular.Subtype__EBV_vs_MSI__DN           | DEG-TumorNormal.neoplasm_histologic_grade__G2__UP |
| 7  | M690   | M467          | 85          | CHRNA9,GPR139,MIR369,MIR889,AX746877,LINC00277,SPINK6,ALX4,CACNG7,HPD              | GPR139(59),CHRNA9(44)                                                                                | HEMATOPOIETIN_INTERFERON_CLASSD200_DOMAIN_CYTOKINE_RECEPTOR_BINDING | NA                                                      | NA                                                |
| 8  | M395   | M110          | 127         | DQ585295,DQ582474,DGKK,DQ594374,MYL7,LCE2C,LOC643648,PLA2G2E,CCL16,OC90            | DQ585295(56),DQ582474(44),DGKK(19),MYL7(16)                                                          | MYOSIN_COMPLEX                                                      | NA                                                      | NA                                                |
| 9  | M438   | M121          | 112         | MOGAT3,PPP1R14D,TMEM150B,NR1I2,MYO7B,LINC00483,CYP2B6,MUC17,SLC22A18AS,ANKS4B      | MOGAT3(36),PPP1R14D(28),TMEM150B(21),NR1I2(21)                                                       | KEGG_ARACHIDONIC_ACID_METABOLISM                                    | DEG-subtype.Molecular.Subtype__CIN_vs_EBV__UP           | DEG-TumorNormal.neoplasm_histologic_grade__G2__UP |
| 10 | M126   | M7            | 246         | PTPRH,FA2H,VILL,KCNK1,TJP3,CAPN8,BC034929,B3GNT3,RAB27B,CORO2A                     | KCNK1(41),PTPRH(33),TJP3(30),CAPN8(23),RAB27B(21),FA2H(20),UNC5CL(19),VILL(18)                       | KEGG_GLYCEROPHOSPHOLIPID_METABOLISM                                 | DEG-subtype.Lauren.Class__Diffuse_vs_Mixed__DN          | DEG-TumorNormal.Molecular.Subtype__CIN__UP        |
| 11 | M458   | M126          | 101         | PTPRH,CORO2A,TJP3,B3GNT3,BCL2L15,TMC5,ANXA4,KCNK5,PLS1,PRR15                       | TJP3(27),PTPRH(26)                                                                                   | KEGG_NITROGEN_METABOLISM                                            | DEG-subtype.Lauren.Class__Diffuse_vs_Mixed__DN          | DEG-TumorNormal.Molecular.Subtype__CIN__UP        |
| 12 | M447   | M123          | 63          | EXOC5,NAA30,EIF2S1,KIAA0586,CNIH,TRMT5,PPM1A,KIAA1737,PPP2R5E,EXD2                 | EXOC5(24)                                                                                            | PROTEIN_FOLDING                                                     | NA                                                      | NA                                                |
| 13 | M614   | M338          | 64          | Y_RNA,5S_rRNA,RN7SK,BC062350,TRNA_Pseudo,Mir_324,OCLM,Mir_633,TRNA,TRNA_Gln        | Y_RNA(48),5S_rRNA(22)                                                                                | NA                                                                  | NA                                                      | NA                                                |
| 14 | M81    | M4            | 54          | DHX15,NFXL1,PDS5A,N4BP2,ANKRD17,NOP14,RLF,ZMYM1,GUF1,LRBA                          | DHX15(23),PDS5A(21)                                                                                  | KEGG_PENTOSE_PHOSPHATE_PATHWAY                                      | NA                                                      | NA                                                |
| 15 | M110   | M7            | 195         | DQ585295,DQ582474,CCL16,PLA2G2E,DQ594374,DGKK,MIMT1,RELN,MYL7,LCE2C                | DQ585295(56),DQ582474(44),PEG3-AS1(20),DGKK(19),F2(17),MYL7(16)                                      | HORMONE_BINDING                                                     | NA                                                      | NA                                                |
| 16 | M129   | M7            | 105         | CHRNA9,GPR139,MIR369,MIR889,AX746877,SPINK6,CACNG7,ZNF474,LINC00277,ALX4           | GPR139(59),CHRNA9(44)                                                                                | AROMATIC_COMPOUND_METABOLIC_PROCESS                                 | NA                                                      | NA                                                |
| 17 | M685   | M458          | 54          | CORO2A,TJP3,PRSS8,BCL2L15,PLEKHG6,TMC5,IL22RA1,CDC42EP5,PDZK11P1,TLCD2             | TJP3(25)                                                                                             | KEGG_NITROGEN_METABOLISM                                            | DEG-subtype.WHO.Class__Papillary_vs_Poorly_Cohesive__UP | DEG-TumorNormal.neoplasm_histologic_grade__G2__UP |
| 18 | M338   | M86           | 155         | U6,Y_RNA,SPDYE1,LOC100505716,AX746867,Metazoa_SRP,5S_rRNA,MRS2P2,TRNA_Pseudo,RN7SK | Y_RNA(58),U6(56),5S_rRNA(23),SPDYE1(20),LOC100505716(20),RN7SK(16)                                   | NA                                                                  | NA                                                      | NA                                                |
| 19 | M349   | M93           | 55          | AHSA2,PILRB,RPL32P3,INE1,LOC100272228,MIR3916,MIR631,GIGYF1,AK128346,LOC100289230  | AHSA2(31),PILRB(20)                                                                                  | SINGLE_STRANDED_RNA_BINDING                                         | NA                                                      | NA                                                |
| 20 | M158   | M11           | 120         | YJEFN3,WDR83,NDUFA11,NDUFB7,UBA52,GADD45GIP1,C19orf53,C19orf70,C19orf60,DHPS       | WDR83(26),NDUFA11(20),NDUFB7(19),YJEFN3(18),C19orf53(18),GADD45GIP1(16)                              | KEGG_RIBOSOME                                                       | NA                                                      | NA                                                |
| 21 | M467   | M129          | 96          | CHRNA9,GPR139,MIR369,MIR889,AX746877,SPINK6,LINC00277,ALX4,CACNG7,HPD              | GPR139(59),CHRNA9(44)                                                                                | AROMATIC_COMPOUND_METABOLIC_PROCESS                                 | NA                                                      | NA                                                |
| 22 | M119   | M7            | 181         | TFF1,VSIG1,CA2,DPCR1,TFF2,CTSE,ANXA10,MUC5AC,AKR1B10,FER1L6                        | TFF1(29),CA2(24),CYSTM1(24),TFF2(21),CTSE(21),DPCR1(18),BCAS1(18),FER1L6(17),AKR1B10(17),FAM177B(17) | DIGESTION                                                           | DEG-subtype.Molecular.Subtype__CIN_vs_EBV__UP           | DEG-TumorNormal.Anatomic.Region__FUNDUS_BODY__DN  |
| 23 | M667   | M438          | 60          | MOGAT3,TMEM150B,ANKS4B,MYO1A,ACOT11,DDC,MUC17,C14orf176,LINC00483,SLAIN1           | MOGAT3(32)                                                                                           | AMINO_ACID_TRANSPORT                                                | DEG-subtype.Lauren.Class__Diffuse_vs_Mixed__DN          | DEG-TumorNormal.neoplasm_histologic_grade__G2__UP |
| 24 | M417   | M115          | 86          | FILIP1,MYOCD,DMD,JA202350,LOC401093,MIR143HG,DNAJB5,PDE1C,SLMAP,VCL                | FILIP1(27),SLMAP(16)                                                                                 | DYSTROPHIN_ASSOCIATED_GLYCOPROTEIN_COMPLEX                          | DEG-subtype.WHO.Class__Papillary_vs_Poorly_Cohesive__DN | DEG-TumorNormal.Anatomic.Region__GEJ_CARDIA__DN   |
| 25 | M122   | M7            | 134         | GALNT3,ERN2,SLC44A4,AKR7A3,AKR7L,FAM83E,FUT3,AGR2,SLC50A1,GFPT1                    | GALNT3(24),SLC44A4(22),ERN2(20),AKR7A3(17),GFPT1(17),AKR7L(16)                                       | KEGG_O_GLYCAN_BIOSYNTHESIS                                          | DEG-subtype.Molecular.Subtype__EBV_vs_MSI__DN           | DEG-TumorNormal.Molecular.Subtype__CIN__UP        |
| 26 | M127   | M7            | 186         | FABP1,MEP1A,FABP2,BTNL3,PLA2G12B,SI,TM6SF2,C10orf112,HAPLN4,OSTBETA                | FABP2(33),TM6SF2(28),BTNL3(27),PLA2G12B(12),MEP1A(20),FABP1(20),SI(16)                               | LIPID_METABOLIC_PROCESS                                             | DEG-subtype.Molecular.Subtype__CIN_vs_EBV__UP           | DEG-TumorNormal.Anatomic.Region__FUNDUS_BODY__DN  |
| 27 | M9     | M4            | 91          | MAK16,TTI2,DOCK5,FUT10,XPO7,UTF2E2,KCTD9,TNFRSF10A,INTS10,LOC389641                | DOCK5(21),XPO7(17),TTI2(17)                                                                          | OXIDOREDUCTASE_ACTIVITY_ACTING_ON_SULFUR_GROUP_OF_DONORS            | NA                                                      | NA                                                |
| 28 | M258   | M41           | 60          | NOP56,MCM8,TRMT6,STK35,SNRPB,FASTKD5,ODC25B,C20orf72,MRPS26,PCNA                   | SNRPB(19),MCM8(17)                                                                                   | RNA_PROCESSING                                                      | NA                                                      | DEG-TumorNormal.Molecular.Subtype__CIN__UP        |
| 29 | M475   | M137          | 154         | PKP3,ESRP2,SPINT1,EPS8L2,CDS1,C6orf132,CDC42BPG,MYO5B,OR7E14P,LOC100652770         | PKP3(39),ESRP2(25),CDS1(24),EPS8L2(16)                                                               | INTRACELLULAR_SIGNALING_CASCADE                                     | DEG-subtype.Lauren.Class__Diffuse_vs_Mixed__DN          | DEG-TumorNormal.neoplasm_histologic_grade__G2__UP |
| 30 | M203   | M25           | 66          | MRPS2,BC015688,C9orf116,METTL11A,RPL35,RPL7A,MRRF,NPM3,UBAC1,FXN                   | BC015688(26),MRPS2(22)                                                                               | KEGG_RIBOSOME                                                       | NA                                                      | NA                                                |

# Supporting Material 2B: Module Preservation Analysis

|    | Module | medianRank.pres | medianRank.qual | Zconnectivity.pres | log.p.Bonfconnectivity.pres | Zsummary.pres | Zsummary.qual | log.p.Bonfsummary.pres | is.preserved | comparison           |
|----|--------|-----------------|-----------------|--------------------|-----------------------------|---------------|---------------|------------------------|--------------|----------------------|
| 1  | M110   | 442.0           | 530.5           | 4.50               | −2.7                        | 4.1           | 7.4           | −1.90                  | TRUE         | TCGA_GCC.vs.GSE84437 |
| 2  | M119   | 311.0           | 578.0           | 15.00              | −51.0                       | 14.0          | 7.8           | −40.00                 | TRUE         | TCGA_GCC.vs.GSE84437 |
| 3  | M121   | 371.0           | 566.0           | 11.00              | −27.0                       | 8.5           | 8.7           | −16.00                 | TRUE         | TCGA_GCC.vs.GSE84437 |
| 4  | M122   | 510.0           | 581.5           | 13.00              | −35.0                       | 7.8           | 6.1           | −18.00                 | TRUE         | TCGA_GCC.vs.GSE84437 |
| 5  | M126   | 471.0           | 595.0           | 19.00              | −74.0                       | 15.0          | 7.2           | −53.00                 | TRUE         | TCGA_GCC.vs.GSE84437 |
| 6  | M127   | 364.0           | 570.5           | 17.00              | −63.0                       | 11.0          | 7.1           | −34.00                 | TRUE         | TCGA_GCC.vs.GSE84437 |
| 7  | M129   | 458.5           | 544.0           | 3.30               | −0.5                        | 2.9           | 5.5           | −0.25                  | FALSE        | TCGA_GCC.vs.GSE84437 |
| 8  | M158   | 555.0           | 517.0           | 7.60               | −11.0                       | 5.4           | 6.8           | −6.20                  | TRUE         | TCGA_GCC.vs.GSE84437 |
| 9  | M203   | 505.0           | 530.0           | 6.80               | −8.4                        | 4.5           | 9.2           | −4.20                  | TRUE         | TCGA_GCC.vs.GSE84437 |
| 10 | M226   | 450.0           | 551.0           | 12.00              | −29.0                       | 9.3           | 9.7           | −19.00                 | TRUE         | TCGA_GCC.vs.GSE84437 |
| 11 | M258   | 399.0           | 390.5           | 8.70               | −15.0                       | 6.7           | 7.1           | −9.10                  | TRUE         | TCGA_GCC.vs.GSE84437 |
| 12 | M28    | 501.0           | 583.0           | 14.00              | −44.0                       | 10.0          | 9.3           | −25.00                 | TRUE         | TCGA_GCC.vs.GSE84437 |
| 13 | M338   | 421.0           | 595.5           | 2.00               | 0.0                         | 2.9           | 2.3           | −0.78                  | FALSE        | TCGA_GCC.vs.GSE84437 |
| 14 | M349   | 156.0           | 358.0           | 2.50               | 0.0                         | 4.5           | 6.7           | −3.60                  | FALSE        | TCGA_GCC.vs.GSE84437 |
| 15 | M395   | 345.0           | 315.0           | 5.60               | −5.2                        | 4.5           | 9.4           | −3.00                  | TRUE         | TCGA_GCC.vs.GSE84437 |
| 16 | M417   | 387.5           | 274.5           | 2.60               | 0.0                         | 3.1           | 14.0          | −0.60                  | FALSE        | TCGA_GCC.vs.GSE84437 |
| 17 | M434   | 243.0           | 553.0           | 6.20               | −6.7                        | 6.7           | 4.5           | −8.40                  | TRUE         | TCGA_GCC.vs.GSE84437 |
| 18 | M437   | 338.0           | 535.5           | 8.10               | −13.0                       | 7.2           | 5.3           | −10.00                 | TRUE         | TCGA_GCC.vs.GSE84437 |
| 19 | M438   | 274.0           | 479.5           | 8.30               | −14.0                       | 6.7           | 11.0          | −9.20                  | TRUE         | TCGA_GCC.vs.GSE84437 |
| 20 | M447   | 495.0           | 558.0           | 0.91               | 0.0                         | 2.3           | 7.0           | −0.67                  | FALSE        | TCGA_GCC.vs.GSE84437 |
| 21 | M458   | 308.0           | 491.0           | 7.60               | −11.0                       | 8.2           | 10.0          | −14.00                 | TRUE         | TCGA_GCC.vs.GSE84437 |
| 22 | M467   | 458.5           | 544.0           | 5.00               | −3.8                        | 3.7           | 4.4           | −2.00                  | TRUE         | TCGA_GCC.vs.GSE84437 |
| 23 | M475   | 494.0           | 584.5           | 9.40               | −18.0                       | 6.2           | 14.0          | −9.00                  | TRUE         | TCGA_GCC.vs.GSE84437 |
| 24 | M614   | 61.0            | 138.5           | −1.80              | 0.0                         | 2.0           | 3.0           | −2.80                  | FALSE        | TCGA_GCC.vs.GSE84437 |
| 25 | M666   | 286.0           | 477.0           | 6.70               | −8.1                        | 5.1           | 7.7           | −4.70                  | TRUE         | TCGA_GCC.vs.GSE84437 |
| 26 | M667   | 225.0           | 390.5           | 7.90               | −12.0                       | 5.9           | 7.9           | −6.90                  | TRUE         | TCGA_GCC.vs.GSE84437 |
| 27 | M685   | 282.0           | 446.5           | 8.90               | −16.0                       | 5.7           | 6.7           | −7.80                  | TRUE         | TCGA_GCC.vs.GSE84437 |
| 28 | M690   | 354.0           | 417.0           | 2.00               | 0.0                         | 3.1           | 6.4           | −1.60                  | FALSE        | TCGA_GCC.vs.GSE84437 |
| 29 | M81    | 423.0           | 431.5           | 6.00               | −6.2                        | 5.0           | 6.8           | −4.10                  | TRUE         | TCGA_GCC.vs.GSE84437 |
| 30 | M9     | 292.0           | 364.5           | 7.70               | −12.0                       | 6.8           | 11.0          | −8.90                  | TRUE         | TCGA_GCC.vs.GSE84437 |

|    | Module | medianRank.pres | medianRank.qual | Zconnectivity.pres | log.p.Bonfconnectivity.pres | Zsummary.pres | Zsummary.qual | log.p.Bonfsummary.pres | is.preserved | comparison            |
|----|--------|-----------------|-----------------|--------------------|-----------------------------|---------------|---------------|------------------------|--------------|-----------------------|
| 1  | M110   | 386.0           | 570.0           | 5.200              | −4.3                        | 11.000        | 6.1           | −40.00                 | TRUE         | TCGA_GCC.vs.TCGA_vGCC |
| 2  | M119   | 379.0           | 569.5           | 27.000             | −150.0                      | 21.000        | 9.6           | −100.00                | TRUE         | TCGA_GCC.vs.TCGA_vGCC |
| 3  | M121   | 526.0           | 561.5           | 21.000             | −99.0                       | 17.000        | 9.0           | −69.00                 | TRUE         | TCGA_GCC.vs.TCGA_vGCC |
| 4  | M122   | 510.0           | 577.0           | 24.000             | −130.0                      | 17.000        | 5.8           | −77.00                 | TRUE         | TCGA_GCC.vs.TCGA_vGCC |
| 5  | M126   | 535.0           | 596.5           | 16.000             | −58.0                       | 13.000        | 8.4           | −39.00                 | TRUE         | TCGA_GCC.vs.TCGA_vGCC |
| 6  | M127   | 544.0           | 573.5           | 18.000             | −66.0                       | 12.000        | 7.9           | −37.00                 | TRUE         | TCGA_GCC.vs.TCGA_vGCC |
| 7  | M129   | 597.5           | 575.0           | −0.049             | 0.0                         | 1.300         | 5.0           | −0.77                  | FALSE        | TCGA_GCC.vs.TCGA_vGCC |
| 8  | M158   | 503.0           | 485.5           | 17.000             | −59.0                       | 17.000        | 7.6           | −75.00                 | TRUE         | TCGA_GCC.vs.TCGA_vGCC |
| 9  | M203   | 441.0           | 544.5           | 13.000             | −36.0                       | 10.000        | 7.4           | −25.00                 | TRUE         | TCGA_GCC.vs.TCGA_vGCC |
| 10 | M226   | 486.0           | 543.5           | 21.000             | −98.0                       | 16.000        | 8.0           | −62.00                 | TRUE         | TCGA_GCC.vs.TCGA_vGCC |
| 11 | M258   | 260.0           | 435.0           | 12.000             | −28.0                       | 12.000        | 8.6           | −31.00                 | TRUE         | TCGA_GCC.vs.TCGA_vGCC |
| 12 | M28    | 517.0           | 572.0           | 25.000             | −130.0                      | 19.000        | 23.0          | −88.00                 | TRUE         | TCGA_GCC.vs.TCGA_vGCC |
| 13 | M338   | 590.0           | 597.5           | 2.700              | 0.0                         | 2.800         | 2.6           | −1.50                  | FALSE        | TCGA_GCC.vs.TCGA_vGCC |
| 14 | M349   | 530.0           | 429.5           | 5.800              | −5.8                        | 6.100         | 6.0           | −8.10                  | TRUE         | TCGA_GCC.vs.TCGA_vGCC |
| 15 | M395   | 348.0           | 403.5           | 1.900              | 0.0                         | 8.100         | 6.5           | −23.00                 | FALSE        | TCGA_GCC.vs.TCGA_vGCC |
| 16 | M417   | 232.0           | 368.5           | 8.500              | −14.0                       | 12.000        | 11.0          | −33.00                 | TRUE         | TCGA_GCC.vs.TCGA_vGCC |
| 17 | M434   | 335.0           | 549.5           | 13.000             | −34.0                       | 12.000        | 6.2           | −28.00                 | TRUE         | TCGA_GCC.vs.TCGA_vGCC |
| 18 | M437   | 487.0           | 529.5           | 13.000             | −35.0                       | 11.000        | 9.9           | −25.00                 | TRUE         | TCGA_GCC.vs.TCGA_vGCC |
| 19 | M438   | 455.0           | 472.0           | 16.000             | −55.0                       | 13.000        | 11.0          | −39.00                 | TRUE         | TCGA_GCC.vs.TCGA_vGCC |
| 20 | M447   | 457.0           | 558.5           | 11.000             | −27.0                       | 9.200         | 4.9           | −18.00                 | TRUE         | TCGA_GCC.vs.TCGA_vGCC |
| 21 | M458   | 459.0           | 506.5           | 15.000             | −49.0                       | 12.000        | 9.8           | −33.00                 | TRUE         | TCGA_GCC.vs.TCGA_vGCC |
| 22 | M467   | 597.5           | 575.0           | −0.470             | 0.0                         | 0.970         | 4.1           | −0.67                  | FALSE        | TCGA_GCC.vs.TCGA_vGCC |
| 23 | M475   | 560.0           | 590.0           | 17.000             | −59.0                       | 13.000        | 11.0          | −38.00                 | TRUE         | TCGA_GCC.vs.TCGA_vGCC |
| 24 | M614   | 592.0           | 554.5           | −0.750             | 0.0                         | 1.100         | 5.0           | −1.00                  | FALSE        | TCGA_GCC.vs.TCGA_vGCC |
| 25 | M666   | 495.0           | 478.0           | 8.600              | −15.0                       | 7.900         | 7.5           | −13.00                 | TRUE         | TCGA_GCC.vs.TCGA_vGCC |
| 26 | M667   | 399.0           | 384.5           | 6.700              | −8.3                        | 9.000         | 13.0          | −17.00                 | TRUE         | TCGA_GCC.vs.TCGA_vGCC |
| 27 | M685   | 401.0           | 427.5           | 8.300              | −13.0                       | 8.100         | 7.6           | −13.00                 | TRUE         | TCGA_GCC.vs.TCGA_vGCC |
| 28 | M690   | 601.0           | 437.0           | 0.530              | 0.0                         | 0.023         | 3.5           | 0.00                   | FALSE        | TCGA_GCC.vs.TCGA_vGCC |
| 29 | M81    | 502.0           | 435.0           | 7.600              | −11.0                       | 7.500         | 8.2           | −11.00                 | TRUE         | TCGA_GCC.vs.TCGA_vGCC |
| 30 | M9     | 336.0           | 339.5           | 15.000             | −45.0                       | 13.000        | 11.0          | −38.00                 | TRUE         | TCGA_GCC.vs.TCGA_vGCC |

# Supporting Material 2C: TCGA barcode list

| cohort    |           | barcodes                                                                                                                                                                                                                                                                                                                                                                                                                                                                                                                                                                                                                                                                                                                                                                                                                                                                                                                                                                                                                                                                                                                                                                                                                                                                                                                                                                                                                                                                                                                                                                                                                                                                                                                                                                                                                                                                                                                                                                                                                                                                                                                                                                                                                                                                                                                                                                                                                                                                                                                                                                                                                                                                                                                                                                                                                                  |
|-----------|-----------|-------------------------------------------------------------------------------------------------------------------------------------------------------------------------------------------------------------------------------------------------------------------------------------------------------------------------------------------------------------------------------------------------------------------------------------------------------------------------------------------------------------------------------------------------------------------------------------------------------------------------------------------------------------------------------------------------------------------------------------------------------------------------------------------------------------------------------------------------------------------------------------------------------------------------------------------------------------------------------------------------------------------------------------------------------------------------------------------------------------------------------------------------------------------------------------------------------------------------------------------------------------------------------------------------------------------------------------------------------------------------------------------------------------------------------------------------------------------------------------------------------------------------------------------------------------------------------------------------------------------------------------------------------------------------------------------------------------------------------------------------------------------------------------------------------------------------------------------------------------------------------------------------------------------------------------------------------------------------------------------------------------------------------------------------------------------------------------------------------------------------------------------------------------------------------------------------------------------------------------------------------------------------------------------------------------------------------------------------------------------------------------------------------------------------------------------------------------------------------------------------------------------------------------------------------------------------------------------------------------------------------------------------------------------------------------------------------------------------------------------------------------------------------------------------------------------------------------------|
| TCGA-GCC  | TCGA-GCC  | TCGA-BR-8364,TCGA-BR-8363,TCGA-BR-8380,TCGA-BR-8372,TCGA-BR-8486,TCGA-BR-8589,TCGA-BR-8592,TCGA-BR-8678,TCGA-BR-8591,TCGA-IN-7808,TCGA-BR-8686,TCGA-IN-8462,TCGA-BR-6707,TCGA-HU-A4GN,TCGA-HU-A4GP,TCGA-HU-A4GC,TCGA-D7-6527,TCGA-D7-6524,TCGA-D7-6528,TCGA-D7-6522,TCGA-FP-8631,TCGA-HU-8238,TCGA-HU-A4GF,TCGA-HU-A4G3,TCGA-D7-5578,TCGA-D7-6820,TCGA-HU-A4GJ,TCGA-HU-8610,TCGA-HU-A4G9,TCGA-HU-A4GH,TCGA-D7-6525,TCGA-BR-6705,TCGA-D7-6815,TCGA-BR-6852,TCGA-BR-6710,TCGA-BR-6564,TCGA-D7-6817,TCGA-HU-8602,TCGA-BR-4255,TCGA-BR-4187,TCGA-BR-4257,TCGA-BR-4267,TCGA-HU-A4HB,TCGA-HU-A4H3,TCGA-HU-A4G8,TCGA-BR-A4PE,TCGA-HU-A4GX,TCGA-HU-A4H0,TCGA-HU-A4GU,TCGA-D7-6526,TCGA-D7-8578,TCGA-BR-8286,TCGA-D7-8579,TCGA-BR-8365,TCGA-CD-8529,TCGA-BR-8366,TCGA-BR-8060,TCGA-HU-8244,TCGA-BR-8080,TCGA-HU-A4G6,TCGA-BR-A4CR,TCGA-BR-8373,TCGA-CD-8532,TCGA-BR-7716,TCGA-FP-7916,TCGA-IP-7968,TCGA-F1-6875,TCGA-IN-7806,TCGA-BR-7717,TCGA-B7-5818,TCGA-D7-5577,TCGA-CD-5801,TCGA-BR-6566,TCGA-FP-8209,TCGA-BR-8367,TCGA-BR-8289,TCGA-BR-8371,TCGA-CD-8526,TCGA-BR-8368,TCGA-D7-8573,TCGA-BR-7722,TCGA-CD-5804,TCGA-BR-6563,TCGA-D7-6818,TCGA-BR-6709,TCGA-BR-6803,TCGA-D7-6822,TCGA-D7-6521,TCGA-CD-8524,TCGA-CD-8530,TCGA-FP-8211,TCGA-CD-A487,TCGA-CD-A489,TCGA-D7-8570,TCGA-CD-8528,TCGA-CD-8531,TCGA-BR-8078,TCGA-BR-8077,TCGA-CD-8534,TCGA-FP-8099,TCGA-BR-8059,TCGA-BR-8679,TCGA-HU-8604,TCGA-BR-8382,TCGA-BR-8588,TCGA-HU-8608,TCGA-IN-8663,TCGA-BR-8683,TCGA-BR-8687,TCGA-BR-8384,TCGA-BR-8590,TCGA-BR-8381,TCGA-BR-8680,TCGA-BR-8677,TCGA-BR-8483,TCGA-HU-A4HD,TCGA-HU-A4H4,TCGA-HU-A4H6,TCGA-D7-A4YV,TCGA-HU-A4H5,TCGA-BR-A4QI,TCGA-HU-A4H2,TCGA-BR-6801,TCGA-F1-6874,TCGA-BR-6706,TCGA-BR-6802,TCGA-CD-8535,TCGA-BR-8362,TCGA-D7-8576,TCGA-CD-A48C,TCGA-CD-8533,TCGA-HU-A4GY,TCGA-BR-A44T,TCGA-BR-8297,TCGA-EQ-8122,TCGA-D7-8575,TCGA-BR-8284,TCGA-FP-7735,TCGA-BR-7723,TCGA-CD-5813,TCGA-B7-5816,TCGA-D7-A4YY,TCGA-D7-A4YX,TCGA-D7-A4YU,TCGA-D7-6520,TCGA-BR-6565,TCGA-BR-8484,TCGA-BR-8487,TCGA-BR-8682,TCGA-BR-8485,TCGA-BR-8058,TCGA-BR-8369,TCGA-CD-8536,TCGA-D7-8572,TCGA-CD-A486,TCGA-FP-A4BE,TCGA-BR-8361,TCGA-BR-A453,TCGA-F1-A448,TCGA-BR-A4CS,TCGA-BR-8291,TCGA-BR-8081,TCGA-D7-8574,TCGA-FP-8210,TCGA-BR-4280,TCGA-BR-4292,TCGA-BR-4256,TCGA-BR-7901,TCGA-BR-7707,TCGA-BR-7715,TCGA-CD-5803,TCGA-CD-5800,TCGA-BR-A4PF,TCGA-HU-A4H8,TCGA-D7-A4YT,TCGA-HU-A4GT,TCGA-BR-A4PD,TCGA-BR-A452,TCGA-HU-A4G2,TCGA-EQ-A4SO,TCGA-CD-5798,TCGA-CD-5799,TCGA-D7-6518,TCGA-D7-6519,TCGA-F1-6177,TCGA-BR-6452,TCGA-BR-6453,TCGA-BR-6454,TCGA-BR-6455,TCGA-BR-6456,TCGA-BR-6457,TCGA-BR-6458,TCGA-BR-7196,TCGA-BR-7703,TCGA-FP-7829,TCGA-BR-7197,TCGA-BR-7851,TCGA-BR-7957,TCGA-FP-7998,TCGA-BR-7958,TCGA-BR-7959,TCGA-BR-A4J7,TCGA-BR-A4IU,TCGA-BR-A4J9,TCGA-CD-A4MH,TCGA-D7-A4Z0,TCGA-BR-A4IY,TCGA-BR-A4J6,TCGA-BR-A4J4,TCGA-CD-A4MJ |
| vTCGA-GCC | vTCGA-GCC | TCGA-VQ-A8PD,TCGA-IN-A7NR,TCGA-D7-A6EX,TCGA-VQ-A8E2,TCGA-VQ-A8PK,TCGA-BR-4367,TCGA-VQ-A94P,TCGA-VQ-A925,TCGA-VQ-A8DZ,TCGA-VQ-A91X,TCGA-BR-4191,TCGA-HJ-7597,TCGA-VQ-A8P5,TCGA-D7-A6F2,TCGA-MX-A666,TCGA-VQ-A8P3,TCGA-R5-A7ZI,TCGA-FP-A4BF,TCGA-RD-A7BS,TCGA-IN-A6RS,TCGA-VQ-A8P8,TCGA-FP-A8CX,TCGA-KB-A93J,TCGA-VQ-A8PE,TCGA-IN-A6RN,TCGA-IN-A6RJ,TCGA-VQ-AA6F,TCGA-ZA-A8F6,TCGA-HU-A4GD,TCGA-RD-A8N2,TCGA-BR-4361,TCGA-R5-A805,TCGA-ZQ-A9CR,TCGA-D7-A6EV,TCGA-VQ-AA6A,TCGA-BR-4279,TCGA-D7-A6EY,TCGA-VQ-A928,TCGA-R5-A7ZE,TCGA-D7-A6EZ,TCGA-VQ-A91A,TCGA-VQ-AA64,TCGA-IN-A6RO,TCGA-RD-A8N6,TCGA-VQ-A91U,TCGA-D7-A748,TCGA-R5-A7ZR,TCGA-VQ-A8E0,TCGA-BR-4370,TCGA-KB-A93G,TCGA-MX-A5UG,TCGA-B7-A5TI,TCGA-D7-A74A,TCGA-BR-4363,TCGA-VQ-A8PH,TCGA-IN-A6RI,TCGA-VQ-A91K,TCGA-BR-A44U,TCGA-VQ-A8PU,TCGA-BR-4366,TCGA-RD-A8N9,TCGA-VQ-A91E,TCGA-D7-A6F0,TCGA-IN-AB1X,TCGA-VQ-A8PC,TCGA-VQ-A8E7,TCGA-VQ-AA6K,TCGA-IN-AB1V,TCGA-R5-A7ZF,TCGA-IN-A7NU,TCGA-RD-A8N0,TCGA-VQ-A92D,TCGA-MX-A5UJ,TCGA-IN-A6RL,TCGA-VQ-A91D,TCGA-BR-7704,TCGA-BR-8295,TCGA-VQ-A91Z,TCGA-RD-A7BW,TCGA-VQ-A94R,TCGA-RD-A8N1,TCGA-SW-A7EA,TCGA-CD-8525,TCGA-BR-8690,TCGA-RD-A8MV,TCGA-RD-A8MW,TCGA-BR-4294,TCGA-VQ-A8PO,TCGA-RD-A7BT,TCGA-BR-8676,TCGA-D7-A747,TCGA-BR-4357,TCGA-VQ-A8DV,TCGA-VQ-A923,TCGA-BR-4371,TCGA-RD-A8N4,TCGA-VQ-A94O,TCGA-VQ-A8PQ,TCGA-F1-A72C,TCGA-BR-4253,TCGA-VQ-A927,TCGA-BR-4368,TCGA-VQ-A94U,TCGA-HU-8249,TCGA-KB-A93H,TCGA-RD-A8NB,TCGA-BR-4201,TCGA-B7-A5TK,TCGA-B7-A5TJ,TCGA-SW-A7EB,TCGA-BR-4369,TCGA-RD-A7C1,TCGA-CD-A48A,TCGA-VQ-AA6G,TCGA-BR-A4QL,TCGA-BR-8296,TCGA-FP-A9TM,TCGA-VQ-AA69,TCGA-R5-A7O7,TCGA-VQ-A8E3,TCGA-RD-A8N5,TCGA-CD-8527,TCGA-VQ-A91Y,TCGA-VQ-A91S,TCGA-MX-A663,TCGA-IN-A7NT,TCGA-VQ-AA6J,TCGA-VQ-AA68,TCGA-VQ-A8PM,TCGA-VQ-A8DU                                                                                                                                                                                                                                                                                                                                                                                                                                                                                                                                                                                                                                                                                                                                                                                                                                                                                                                                                                                                                                                                                 |



# Supporting Material 3B:SMG enrichments in modules (NEB/PIK3CA)

|    | module id | mutation signature id       | cohort   | mutated.gene | comparison         | DEG.ID | num.mutated | num.wildtype | Background | set1_size | set2_size | expected.overlap | actual.overlap | enrichment.foldchange | odds.ratio         | FET_pvalue    | corrected.FET.pvalue |
|----|-----------|-----------------------------|----------|--------------|--------------------|--------|-------------|--------------|------------|-----------|-----------|------------------|----------------|-----------------------|--------------------|---------------|----------------------|
| 1  | M109      | NEB__mutant_vs_wildtype__DN | TCGA-GCC | NEB          | mutant_vs_wildtype | DN     | 26          | 187          | 26540      | 866       | 989       | 32.2710625       | 223            | 6.910216              | 11.273516967886    | 5.390552e-126 | 5.482130e-120        |
| 2  | M116      | NEB__mutant_vs_wildtype__DN | TCGA-GCC | NEB          | mutant_vs_wildtype | DN     | 26          | 187          | 26540      | 455       | 989       | 16.9553504       | 151            | 8.905743              | 14.959989305776899 | 1.329752e-101 | 6.761714e-96         |
| 3  | M633      | NEB__mutant_vs_wildtype__DN | TCGA-GCC | NEB          | mutant_vs_wildtype | DN     | 26          | 187          | 26540      | 387       | 989       | 14.4213640       | 129            | 8.945062              | 14.700513287721    | 9.016302e-87  | 1.833895e-81         |
| 4  | M384      | NEB__mutant_vs_wildtype__DN | TCGA-GCC | NEB          | mutant_vs_wildtype | DN     | 26          | 187          | 26540      | 442       | 989       | 16.4709118       | 134            | 8.135554              | 12.8430440396834   | 3.890013e-84  | 6.593498e-79         |
| 5  | M111      | NEB__mutant_vs_wildtype__DN | TCGA-GCC | NEB          | mutant_vs_wildtype | DN     | 26          | 187          | 26540      | 787       | 989       | 29.3271665       | 172            | 5.864869              | 8.5345770672724104 | 1.521651e-83  | 2.443423e-78         |
| 6  | M399      | NEB__mutant_vs_wildtype__DN | TCGA-GCC | NEB          | mutant_vs_wildtype | DN     | 26          | 187          | 26540      | 644       | 989       | 23.9983421       | 149            | 6.208762              | 8.97688004798432   | 1.227786e-75  | 1.628666e-70         |
| 7  | M635      | NEB__mutant_vs_wildtype__DN | TCGA-GCC | NEB          | mutant_vs_wildtype | DN     | 26          | 187          | 26540      | 499       | 989       | 18.5949887       | 127            | 6.829797              | 9.9705236698733195 | 1.577531e-69  | 1.552578e-64         |
| 8  | M112      | NEB__mutant_vs_wildtype__DN | TCGA-GCC | NEB          | mutant_vs_wildtype | DN     | 26          | 187          | 26540      | 604       | 989       | 22.5077619       | 119            | 5.287065              | 7.0665818940304304 | 4.105862e-52  | 1.957320e-47         |
| 9  | M729      | NEB__mutant_vs_wildtype__DN | TCGA-GCC | NEB          | mutant_vs_wildtype | DN     | 26          | 187          | 26540      | 339       | 989       | 12.6326677       | 91             | 7.203546              | 10.3349850521869   | 6.830510e-52  | 3.110396e-47         |
| 10 | M403      | NEB__mutant_vs_wildtype__DN | TCGA-GCC | NEB          | mutant_vs_wildtype | DN     | 26          | 187          | 26540      | 285       | 989       | 10.6203843       | 78             | 7.344367              | 10.4795397611738   | 3.176008e-45  | 9.989579e-41         |
| 11 | M423      | NEB__mutant_vs_wildtype__DN | TCGA-GCC | NEB          | mutant_vs_wildtype | DN     | 26          | 187          | 26540      | 153       | 989       | 5.7014695        | 58             | 10.172816             | 16.687636633380102 | 7.691884e-43  | 1.939477e-38         |
| 12 | M113      | NEB__mutant_vs_wildtype__DN | TCGA-GCC | NEB          | mutant_vs_wildtype | DN     | 26          | 187          | 26540      | 319       | 989       | 11.8873775       | 72             | 6.056845              | 8.0429643934902106 | 9.847683e-36  | 1.155575e-31         |
| 13 | M424      | NEB__mutant_vs_wildtype__DN | TCGA-GCC | NEB          | mutant_vs_wildtype | DN     | 26          | 187          | 26540      | 112       | 989       | 4.1736247        | 45             | 10.781995             | 18.125373492831802 | 8.050711e-35  | 8.440703e-31         |
| 14 | M409      | NEB__mutant_vs_wildtype__DN | TCGA-GCC | NEB          | mutant_vs_wildtype | DN     | 26          | 187          | 26540      | 118       | 989       | 4.3972118        | 41             | 9.324090              | 14.303378099744201 | 7.350447e-29  | 4.346117e-25         |
| 15 | M386      | NEB__mutant_vs_wildtype__DN | TCGA-GCC | NEB          | mutant_vs_wildtype | DN     | 26          | 187          | 26540      | 131       | 989       | 4.8816503        | 42             | 8.603648              | 12.6814513048863   | 6.504945e-28  | 3.556696e-24         |
| 16 | M640      | NEB__mutant_vs_wildtype__DN | TCGA-GCC | NEB          | mutant_vs_wildtype | DN     | 26          | 187          | 26540      | 85        | 989       | 3.1674830        | 35             | 11.049783             | 18.705188833975001 | 8.309353e-28  | 4.527063e-24         |
| 17 | M26       | NEB__mutant_vs_wildtype__UP | TCGA-GCC | NEB          | mutant_vs_wildtype | UP     | 26          | 187          | 26540      | 821       | 580       | 17.9419744       | 65             | 3.622790              | 4.2073491210954597 | 2.761216e-19  | 6.854660e-16         |
| 18 | M226      | NEB__mutant_vs_wildtype__UP | TCGA-GCC | NEB          | mutant_vs_wildtype | UP     | 26          | 187          | 26540      | 223       | 580       | 4.8733986        | 32             | 6.566259              | 7.8771595321437804 | 3.333702e-17  | 6.687056e-14         |
| 19 | M13       | NEB__mutant_vs_wildtype__UP | TCGA-GCC | NEB          | mutant_vs_wildtype | UP     | 26          | 187          | 26540      | 104       | 580       | 2.2727958        | 23             | 10.119695             | 13.1853214715501   | 5.534589e-17  | 1.088005e-13         |
| 20 | M421      | NEB__mutant_vs_wildtype__DN | TCGA-GCC | NEB          | mutant_vs_wildtype | DN     | 26          | 187          | 26540      | 96        | 989       | 3.5773926        | 27             | 7.547396              | 10.363679360218301 | 8.599854e-17  | 1.649143e-13         |
| 21 | M387      | NEB__mutant_vs_wildtype__DN | TCGA-GCC | NEB          | mutant_vs_wildtype | DN     | 26          | 187          | 26540      | 50        | 989       | 1.8632253        | 20             | 10.734075             | 17.5520366273512   | 3.607359e-16  | 6.398797e-13         |
| 22 | M137      | NEB__mutant_vs_wildtype__UP | TCGA-GCC | NEB          | mutant_vs_wildtype | UP     | 26          | 187          | 26540      | 243       | 580       | 5.3104748        | 32             | 6.025827              | 7.1233581886602897 | 4.242675e-16  | 7.477908e-13         |
| 23 | M163      | NEB__mutant_vs_wildtype__UP | TCGA-GCC | NEB          | mutant_vs_wildtype | UP     | 26          | 187          | 26540      | 24        | 580       | 0.5244913        | 13             | 24.785920             | 54.037107637824299 | 4.548118e-16  | 7.997783e-13         |
| 24 | M28       | NEB__mutant_vs_wildtype__UP | TCGA-GCC | NEB          | mutant_vs_wildtype | UP     | 26          | 187          | 26540      | 244       | 580       | 5.3323286        | 32             | 6.001131              | 7.0895823259607198 | 4.784879e-16  | 8.394770e-13         |
| 25 | M367      | NEB__mutant_vs_wildtype__DN | TCGA-GCC | NEB          | mutant_vs_wildtype | DN     | 26          | 187          | 26540      | 134       | 989       | 4.9934439        | 30             | 6.007878              | 7.65437369664504   | 1.610319e-15  | 2.692070e-12         |
| 26 | M656      | NEB__mutant_vs_wildtype__DN | TCGA-GCC | NEB          | mutant_vs_wildtype | DN     | 26          | 187          | 26540      | 55        | 989       | 2.0495479        | 20             | 9.758250              | 15.041868492388801 | 3.239204e-15  | 5.193222e-12         |
| 27 | M211      | NEB__mutant_vs_wildtype__UP | TCGA-GCC | NEB          | mutant_vs_wildtype | UP     | 26          | 187          | 26540      | 173       | 580       | 3.7807084        | 26             | 6.877018              | 8.2394390552120793 | 1.028487e-14  | 1.545754e-11         |
| 28 | M104      | NEB__mutant_vs_wildtype__DN | TCGA-GCC | NEB          | mutant_vs_wildtype | DN     | 26          | 187          | 26540      | 244       | 989       | 9.0925396        | 38             | 4.179250              | 4.9160509121180702 | 7.986523e-14  | 1.084406e-10         |
| 29 | M126      | NEB__mutant_vs_wildtype__UP | TCGA-GCC | NEB          | mutant_vs_wildtype | UP     | 26          | 187          | 26540      | 246       | 580       | 5.3760362        | 28             | 5.208298              | 5.9886839014078896 | 1.172393e-12  | 1.361084e-09         |
| 30 | M727      | NEB__mutant_vs_wildtype__DN | TCGA-GCC | NEB          | mutant_vs_wildtype | DN     | 26          | 187          | 26540      | 110       | 989       | 4.0990957        | 24             | 5.854950              | 7.3615292108890102 | 1.952760e-12  | 2.212330e-09         |
| 31 | M476      | NEB__mutant_vs_wildtype__UP | TCGA-GCC | NEB          | mutant_vs_wildtype | UP     | 26          | 187          | 26540      | 60        | 580       | 1.3112283        | 15             | 11.439655             | 15.2866341044934   | 2.225357e-12  | 2.494302e-09         |
| 32 | M442      | NEB__mutant_vs_wildtype__UP | TCGA-GCC | NEB          | mutant_vs_wildtype | UP     | 26          | 187          | 26540      | 61        | 580       | 1.3330821        | 15             | 11.252120             | 14.943852807102701 | 2.892216e-12  | 3.177549e-09         |
| 33 | M400      | NEB__mutant_vs_wildtype__DN | TCGA-GCC | NEB          | mutant_vs_wildtype | DN     | 26          | 187          | 26540      | 112       | 989       | 4.1736247        | 23             | 5.510797              | 6.8104333079166501 | 2.116996e-11  | 2.028544e-08         |
| 34 | M410      | NEB__mutant_vs_wildtype__DN | TCGA-GCC | NEB          | mutant_vs_wildtype | DN     | 26          | 187          | 26540      | 172       | 989       | 6.4094951        | 28             | 4.368519              | 5.1404399041015703 | 5.126647e-11  | 4.608493e-08         |
| 35 | M634      | NEB__mutant_vs_wildtype__DN | TCGA-GCC | NEB          | mutant_vs_wildtype | DN     | 26          | 187          | 26540      | 100       | 989       | 3.7264506        | 21             | 5.635389              | 6.9935754721081898 | 1.007440e-10  | 8.633889e-08         |
| 36 | M388      | NEB__mutant_vs_wildtype__DN | TCGA-GCC | NEB          | mutant_vs_wildtype | DN     | 26          | 187          | 26540      | 34        | 989       | 1.2669932        | 13             | 10.260513             | 16.187149097140299 | 1.108442e-10  | 9.456989e-08         |
| 37 | M610      | NEB__mutant_vs_wildtype__UP | TCGA-GCC | NEB          | mutant_vs_wildtype | UP     | 26          | 187          | 26540      | 46        | 580       | 1.0052751        | 12             | 11.937031             | 16.1059498997238   | 2.096022e-10  | 1.716289e-07         |
| 38 | M414      | NEB__mutant_vs_wildtype__DN | TCGA-GCC | NEB          | mutant_vs_wildtype | DN     | 26          | 187          | 26540      | 43        | 989       | 1.6023738        | 14             | 8.737038              | 12.630999039419001 | 2.599188e-10  | 2.086851e-07         |
| 39 | M764      | NEB__mutant_vs_wildtype__DN | TCGA-GCC | NEB          | mutant_vs_wildtype | DN     | 26          | 187          | 26540      | 67        | 989       | 2.4967219        | 17             | 6.808928              | 8.9184182532654095 | 2.622214e-10  | 2.103677e-07         |
| 40 | M672      | NEB__mutant_vs_wildtype__UP | TCGA-GCC | NEB          | mutant_vs_wildtype | UP     | 26          | 187          | 26540      | 51        | 580       | 1.1145441        | 12             | 10.766734             | 14.030895775597299 | 7.741879e-10  | 5.715028e-07         |
| 41 | M78       | NEB__mutant_vs_wildtype__UP | TCGA-GCC | NEB          | mutant_vs_wildtype | UP     | 26          | 187          | 26540      | 73        | 580       | 1.5953278        | 13             | 8.148795              | 9.8941763425745002 | 5.901035e-09  | 3.709841e-06         |
| 42 | M122      | NEB__mutant_vs_wildtype__UP | TCGA-GCC | NEB          | mutant_vs_wildtype | UP     | 26          | 187          | 26540      | 134       | 580       | 2.9284099        | 17             | 5.805198              | 6.6682609038924099 | 6.222958e-09  | 3.890580e-06         |
| 43 | M332      | NEB__mutant_vs_wildtype__UP | TCGA-GCC | NEB          | mutant_vs_wildtype | UP     | 26          | 187          | 26540      | 61        | 580       | 1.3330821        | 12             | 9.001696              | 11.1700053834081   | 6.963736e-09  | 4.317440e-06         |
| 44 | M456      | NEB__mutant_vs_wildtype__UP | TCGA-GCC | NEB          | mutant_vs_wildtype | UP     | 26          | 187          | 26540      | 106       | 580       | 2.3165034        | 15             | 6.475277              | 7.5467175401415902 | 1.075925e-08  | 6.426827e-06         |
| 45 | M425      | NEB__mutant_vs_wildtype__DN | TCGA-GCC | NEB          | mutant_vs_wildtype | DN     | 26          | 187          | 26540      | 42        | 989       | 1.5651093        | 12             | 7.667196              | 10.4478299123006   | 2.641187e-08  | 1.448009e-05         |
| 46 | M722      | NEB__mutant_vs_wildtype__UP | TCGA-GCC | NEB          | mutant_vs_wildtype | UP     | 26          | 187          | 26540      | 17        | 580       | 0.3715147        | 7              | 18.841785             | 31.662544759221699 | 3.692984e-08  | 1.965318e-05         |
| 47 | M469      | NEB__mutant_vs_wildtype__UP | TCGA-GCC | NEB          | mutant_vs_wildtype | UP     | 26          | 187          | 26540      | 316       | 580       | 6.9058026        | 25             | 3.620144              | 3.9730288467110602 | 3.746546e-08  | 1.991044e-05         |
| 48 | M740      | NEB__mutant_vs_wildtype__DN | TCGA-GCC | NEB          | mutant_vs_wildtype | DN     | 26          | 187          | 26540      | 24        | 989       | 0.8943482        | 9              | 10.063195             | 15.6287895716848   | 1.054612e-07  | 5.057505e-05         |
| 49 | M114      | NEB__mutant_vs_wildtype__DN | TCGA-GCC | NEB          | mutant_vs_wildtype | DN     | 26          | 187          | 26540      | 112       | 989       | 4.1736247        | 18             | 4.312798              | 5.0196801708898304 | 1.718149e-07  | 7.797137e-05         |
| 50 | M728      | NEB__mutant_vs_wildtype__DN | TCGA-GCC | NEB          | mutant_vs_wildtype | DN     | 26          | 187          | 26540      | 14        | 989       | 0.5217031        | 7              | 13.417594             | 25.999761758786399 | 2.665575e-07  | 1.155360e-04         |

|    | module id | mutation signature id          | cohort   | mutated.gene | comparison         | DEG.ID | num.mutated | num.wildtype | Background | set1_size | set2_size | expected.overlap | actual.overlap | enrichment.foldchange | odds.ratio         | FET_pvalue    | corrected.FET.pvalue |
|----|-----------|--------------------------------|----------|--------------|--------------------|--------|-------------|--------------|------------|-----------|-----------|------------------|----------------|-----------------------|--------------------|---------------|----------------------|
| 1  | M475      | NEB__mutant_vs_wildtype__UP    | TCGA-GCC | NEB          | mutant_vs_wildtype | UP     | 26          | 187          | 26540      | 154       | 580       | 3.3654861        | 16             | 4.754142              | 5.3070933790110297 | 2.918030e-07  | 1.251613e-04         |
| 2  | M458      | NEB__mutant_vs_wildtype__UP    | TCGA-GCC | NEB          | mutant_vs_wildtype | UP     | 26          | 187          | 26540      | 101       | 580       | 2.2072344        | 13             | 5.889723              | 6.7394044610959201 | 3.194893e-07  | 1.355139e-04         |
| 3  | M131      | NEB__mutant_vs_wildtype__UP    | TCGA-GCC | NEB          | mutant_vs_wildtype | UP     | 26          | 187          | 26540      | 384       | 580       | 8.3918613        | 26             | 3.098240              | 3.35595626578609   | 4.321577e-07  | 1.771699e-04         |
| 4  | M684      | NEB__mutant_vs_wildtype__UP    | TCGA-GCC | NEB          | mutant_vs_wildtype | UP     | 26          | 187          | 26540      | 47        | 580       | 1.0271289        | 9              | 8.762289              | 10.7500681622176   | 6.948183e-07  | 2.689501e-04         |
| 5  | M422      | NEB__mutant_vs_wildtype__DN    | TCGA-GCC | NEB          | mutant_vs_wildtype | DN     | 26          | 187          | 26540      | 30        | 989       | 1.1179352        | 9              | 8.050556              | 11.160817350872399 | 9.432337e-07  | 3.518061e-04         |
| 6  | M14       | NEB__mutant_vs_wildtype__UP    | TCGA-GCC | NEB          | mutant_vs_wildtype | UP     | 26          | 187          | 26540      | 280       | 580       | 6.1190656        | 21             | 3.431897              | 3.72773845780881   | 1.097076e-06  | 4.019144e-04         |
| 7  | M177      | NEB__mutant_vs_wildtype__UP    | TCGA-GCC | NEB          | mutant_vs_wildtype | UP     | 26          | 187          | 26540      | 28        | 580       | 0.6119066        | 7              | 11.439655             | 15.0769748317986   | 1.824398e-06  | 6.291599e-04         |
| 8  | M534      | NEB__mutant_vs_wildtype__UP    | TCGA-GCC | NEB          | mutant_vs_wildtype | UP     | 26          | 187          | 26540      | 186       | 580       | 4.0648078        | 16             | 3.936225              | 4.3031355402095004 | 3.632568e-06  | 1.149911e-03         |
| 9  | M165      | NEB__mutant_vs_wildtype__UP    | TCGA-GCC | NEB          | mutant_vs_wildtype | UP     | 26          | 187          | 26540      | 21        | 580       | 0.4589299        | 6              | 13.073892             | 18.073005936827599 | 4.355546e-06  | 1.345002e-03         |
| 10 | M284      | NEB__mutant_vs_wildtype__UP    | TCGA-GCC | NEB          | mutant_vs_wildtype | UP     | 26          | 187          | 26540      | 13        | 580       | 0.2840995        | 5              | 17.599469             | 28.187735913048801 | 5.453414e-06  | 1.634238e-03         |
| 11 | M667      | NEB__mutant_vs_wildtype__UP    | TCGA-GCC | NEB          | mutant_vs_wildtype | UP     | 26          | 187          | 26540      | 60        | 580       | 1.3112283        | 9              | 6.863793              | 8.0060279657824207 | 5.857371e-06  | 1.738727e-03         |
| 12 | M581      | NEB__mutant_vs_wildtype__UP    | TCGA-GCC | NEB          | mutant_vs_wildtype | UP     | 26          | 187          | 26540      | 22        | 580       | 0.4807837        | 6              | 12.479624             | 16.944228906685002 | 5.878447e-06  | 1.744032e-03         |
| 13 | M52       | NEB__mutant_vs_wildtype__UP    | TCGA-GCC | NEB          | mutant_vs_wildtype | UP     | 26          | 187          | 26540      | 33        | 580       | 0.7211756        | 7              | 9.706374              | 12.1809501921279   | 5.987390e-06  | 1.772666e-03         |
| 14 | M121      | NEB__mutant_vs_wildtype__UP    | TCGA-GCC | NEB          | mutant_vs_wildtype | UP     | 26          | 187          | 26540      | 194       | 580       | 4.2396383        | 16             | 3.773907              | 4.1085734287919502 | 6.243826e-06  | 1.838774e-03         |
| 15 | M209      | NEB__mutant_vs_wildtype__UP    | TCGA-GCC | NEB          | mutant_vs_wildtype | UP     | 26          | 187          | 26540      | 243       | 580       | 5.3104748        | 18             | 3.389527              | 3.6633710468567098 | 7.550026e-06  | 2.163508e-03         |
| 16 | M648      | NEB__mutant_vs_wildtype__DN    | TCGA-GCC | NEB          | mutant_vs_wildtype | DN     | 26          | 187          | 26540      | 30        | 989       | 1.1179352        | 8              | 7.156050              | 9.4609069595907194 | 1.018503e-05  | 2.807569e-03         |
| 17 | M427      | NEB__mutant_vs_wildtype__DN    | TCGA-GCC | NEB          | mutant_vs_wildtype | DN     | 26          | 187          | 26540      | 500       | 989       | 18.6322532       | 39             | 2.093145              | 2.2342311933321799 | 1.320344e-05  | 3.512972e-03         |
| 18 | M642      | NEB__mutant_vs_wildtype__DN    | TCGA-GCC | NEB          | mutant_vs_wildtype | DN     | 26          | 187          | 26540      | 52        | 989       | 1.9377543        | 10             | 5.160613              | 6.2034783562260198 | 1.880340e-05  | 4.730255e-03         |
| 19 | M81       | NEB__mutant_vs_wildtype__UP    | TCGA-GCC | NEB          | mutant_vs_wildtype | UP     | 26          | 187          | 26540      | 54        | 580       | 1.1801055        | 8              | 6.779055              | 7.8779373312737997 | 2.129345e-05  | 5.266769e-03         |
| 20 | M156      | NEB__mutant_vs_wildtype__UP    | TCGA-GCC | NEB          | mutant_vs_wildtype | UP     | 26          | 187          | 26540      | 17        | 580       | 0.3715147        | 5              | 13.458418             | 18.794690575445902 | 2.438575e-05  | 5.915097e-03         |
| 21 | M402      | NEB__mutant_vs_wildtype__DN    | TCGA-GCC | NEB          | mutant_vs_wildtype | DN     | 26          | 187          | 26540      | 25        | 989       | 0.9316127        | 7              | 7.513852              | 10.108936995407801 | 2.605204e-05  | 6.252862e-03         |
| 22 | M400      | NEB__mutant_vs_wildtype__UP    | TCGA-GCC | NEB          | mutant_vs_wildtype | UP     | 26          | 187          | 26540      | 112       | 580       | 2.4476262        | 11             | 4.494150              | 4.9488630942659402 | 3.535960e-05  | 8.083392e-03         |
| 23 | M721      | NEB__mutant_vs_wildtype__UP    | TCGA-GCC | NEB          | mutant_vs_wildtype | UP     | 26          | 187          | 26540      | 10        | 580       | 0.2185381        | 4              | 18.303448             | 30.011190949114798 | 4.269321e-05  | 9.493151e-03         |
| 24 | M676      | NEB__mutant_vs_wildtype__UP    | TCGA-GCC | NEB          | mutant_vs_wildtype | UP     | 26          | 187          | 26540      | 20        | 580       | 0.4370761        | 5              | 11.439655             | 15.027992110776699 | 5.786882e-05  | 1.220994e-02         |
| 25 | M750      | NEB__mutant_vs_wildtype__UP    | TCGA-GCC | NEB          | mutant_vs_wildtype | UP     | 26          | 187          | 26540      | 20        | 580       | 0.4370761        | 5              | 11.439655             | 15.027992110776699 | 5.786882e-05  | 1.220994e-02         |
| 26 | M404      | NEB__mutant_vs_wildtype__DN    | TCGA-GCC | NEB          | mutant_vs_wildtype | DN     | 26          | 187          | 26540      | 61        | 989       | 2.2731349        | 10             | 4.399211              | 5.1065722782901899 | 7.917063e-05  | 1.584641e-02         |
| 27 | M578      | NEB__mutant_vs_wildtype__UP    | TCGA-GCC | NEB          | mutant_vs_wildtype | UP     | 26          | 187          | 26540      | 24        | 580       | 0.5244913        | 5              | 9.533046              | 11.86696644445039  | 1.475851e-04  | 2.637518e-02         |
| 28 | M168      | NEB__mutant_vs_wildtype__UP    | TCGA-GCC | NEB          | mutant_vs_wildtype | UP     | 26          | 187          | 26540      | 90        | 580       | 1.9668425        | 9              | 4.575862              | 5.0350570954149596 | 1.567510e-04  | 2.777247e-02         |
| 29 | M438      | NEB__mutant_vs_wildtype__UP    | TCGA-GCC | NEB          | mutant_vs_wildtype | UP     | 26          | 187          | 26540      | 112       | 580       | 2.4476262        | 10             | 4.085591              | 4.4468905754270196 | 1.769127e-04  | 3.069820e-02         |
| 30 | M680      | NEB__mutant_vs_wildtype__DN    | TCGA-GCC | NEB          | mutant_vs_wildtype | DN     | 26          | 187          | 26540      | 80        | 989       | 2.9811605        | 11             | 3.689838              | 4.1533242151612502 | 1.817609e-04  | 3.136042e-02         |
| 31 | M497      | NEB__mutant_vs_wildtype__UP    | TCGA-GCC | NEB          | mutant_vs_wildtype | UP     | 26          | 187          | 26540      | 14        | 580       | 0.3059533        | 4              | 13.073892             | 18.013804055383801 | 1.898047e-04  | 3.247827e-02         |
| 32 | M243      | NEB__mutant_vs_wildtype__UP    | TCGA-GCC | NEB          | mutant_vs_wildtype | UP     | 26          | 187          | 26540      | 76        | 580       | 1.6608892        | 8              | 4.816697              | 5.3241460578014399 | 2.535501e-04  | 4.119130e-02         |
| 33 | M659      | NEB__mutant_vs_wildtype__DN    | TCGA-GCC | NEB          | mutant_vs_wildtype | DN     | 26          | 187          | 26540      | 479       | 989       | 17.8496986       | 34             | 1.904794              | 2.00852662762951   | 2.807548e-04  | 4.469933e-02         |
| 34 | M293      | NEB__mutant_vs_wildtype__UP    | TCGA-GCC | NEB          | mutant_vs_wildtype | UP     | 26          | 187          | 26540      | 28        | 580       | 0.6119066        | 5              | 8.171182              | 9.8043943193619896 | 3.175101e-04  | 4.944176e-02         |
| 35 | M6        | PIK3CA__mutant_vs_wildtype__UP | TCGA-GCC | PIK3CA       | mutant_vs_wildtype | UP     | 37          | 176          | 26540      | 2276      | 747       | 64.0607385       | 347            | 5.416734              | 10.7301467930907   | 8.169669e-173 | 2.492538e-166        |
| 36 | M102      | PIK3CA__mutant_vs_wildtype__UP | TCGA-GCC | PIK3CA       | mutant_vs_wildtype | UP     | 37          | 176          | 26540      | 322       | 747       | 9.0630746        | 130            | 14.343918             | 28.090791448486101 | 2.478834e-116 | 1.890710e-110        |
| 37 | M357      | PIK3CA__mutant_vs_wildtype__UP | TCGA-GCC | PIK3CA       | mutant_vs_wildtype | UP     | 37          | 176          | 26540      | 138       | 747       | 3.8841748        | 68             | 17.506936             | 36.767393092509401 | 6.600084e-68  | 6.292697e-63         |
| 38 | M355      | PIK3CA__mutant_vs_wildtype__UP | TCGA-GCC | PIK3CA       | mutant_vs_wildtype | UP     | 37          | 176          | 26540      | 183       | 747       | 5.1507536        | 65             | 12.619513             | 20.728267552822299 | 1.504959e-53  | 7.527178e-49         |
| 39 | M105      | PIK3CA__mutant_vs_wildtype__UP | TCGA-GCC | PIK3CA       | mutant_vs_wildtype | UP     | 37          | 176          | 26540      | 328       | 747       | 9.2319518        | 77             | 8.340598              | 11.6914855058012   | 2.911988e-48  | 1.070407e-43         |
| 40 | M101      | PIK3CA__mutant_vs_wildtype__UP | TCGA-GCC | PIK3CA       | mutant_vs_wildtype | UP     | 37          | 176          | 26540      | 236       | 747       | 6.6425019        | 66             | 9.936015              | 14.5998735749857   | 1.033739e-46  | 3.504335e-42         |
| 41 | M112      | PIK3CA__mutant_vs_wildtype__DN | TCGA-GCC | PIK3CA       | mutant_vs_wildtype | DN     | 37          | 176          | 26540      | 604       | 631       | 14.3603617       | 84             | 5.849435              | 7.4971363015034402 | 7.775272e-40  | 1.560664e-35         |
| 42 | M109      | PIK3CA__mutant_vs_wildtype__DN | TCGA-GCC | PIK3CA       | mutant_vs_wildtype | DN     | 37          | 176          | 26540      | 866       | 631       | 20.5895252       | 99             | 4.808270              | 6.0990771798146799 | 2.030156e-39  | 3.776791e-35         |
| 43 | M26       | PIK3CA__mutant_vs_wildtype__UP | TCGA-GCC | PIK3CA       | mutant_vs_wildtype | UP     | 37          | 176          | 26540      | 821       | 747       | 23.1080256       | 96             | 4.154401              | 5.09749772978072   | 7.084702e-33  | 6.054673e-29         |
| 44 | M116      | PIK3CA__mutant_vs_wildtype__DN | TCGA-GCC | PIK3CA       | mutant_vs_wildtype | DN     | 37          | 176          | 26540      | 455       | 631       | 10.8178222       | 66             | 6.101043              | 7.6626465403224104 | 1.805784e-32  | 1.461376e-28         |
| 45 | M358      | PIK3CA__mutant_vs_wildtype__UP | TCGA-GCC | PIK3CA       | mutant_vs_wildtype | UP     | 37          | 176          | 26540      | 65        | 747       | 1.8295026        | 32             | 17.491093             | 34.910772410985203 | 1.881911e-32  | 1.514947e-28         |
| 46 | M620      | PIK3CA__mutant_vs_wildtype__UP | TCGA-GCC | PIK3CA       | mutant_vs_wildtype | UP     | 37          | 176          | 26540      | 117       | 747       | 3.2931047        | 39             | 11.842927             | 18.154127950831398 | 2.763946e-31  | 2.036885e-27         |
| 47 | M211      | PIK3CA__mutant_vs_wildtype__UP | TCGA-GCC | PIK3CA       | mutant_vs_wildtype | UP     | 37          | 176          | 26540      | 173       | 747       | 4.8692916        | 41             | 8.420116              | 11.2827318719674   | 2.726702e-26  | 1.273978e-22         |
| 48 | M423      | PIK3CA__mutant_vs_wildtype__DN | TCGA-GCC | PIK3CA       | mutant_vs_wildtype | DN     | 37          | 176          | 26540      | 153       | 631       | 3.6376413        | 36             | 9.896523              | 13.3313989611345   | 1.313943e-25  | 5.662139e-22         |
| 49 | M106      | PIK3CA__mutant_vs_wildtype__UP | TCGA-GCC | PIK3CA       | mutant_vs_wildtype | UP     | 37          | 176          | 26540      | 549       | 747       | 15.4522607       | 67             | 4.335935              | 5.1732964735058502 | 3.805363e-24  | 1.433337e-20         |
| 50 | M633      | PIK3CA__mutant_vs_wildtype__DN | TCGA-GCC | PIK3CA       | mutant_vs_wildtype | DN     | 37          | 176          | 26540      | 387       | 631       | 9.2010927        | 48             | 5.216772              | 6.2091151571269796 | 7.045391e-21  | 1.979305e-17         |

|    | module id | mutation signature id          | cohort   | mutated.gene | comparison         | DEG.ID | num.mutated | num.wildtype | Background | set1_size | set2_size | expected.overlap | actual.overlap | enrichment.foldchange | odds.ratio         | FET_pvalue    | corrected.FET.pvalue |
|----|-----------|--------------------------------|----------|--------------|--------------------|--------|-------------|--------------|------------|-----------|-----------|------------------|----------------|-----------------------|--------------------|---------------|----------------------|
| 1  | M388      | PIK3CA__mutant_vs_wildtype__DN | TCGA-GCC | PIK3CA       | mutant_vs_wildtype | DN     | 37          | 176          | 26540      | 34        | 631       | 0.8083647        | 18             | 22.267176             | 47.480545782407297 | 7.176583e-21  | 2.014306e-17         |
| 2  | M384      | PIK3CA__mutant_vs_wildtype__DN | TCGA-GCC | PIK3CA       | mutant_vs_wildtype | DN     | 37          | 176          | 26540      | 442       | 631       | 10.5087415       | 51             | 4.853103              | 5.7377945687867298 | 1.040529e-20  | 2.891274e-17         |
| 3  | M378      | PIK3CA__mutant_vs_wildtype__UP | TCGA-GCC | PIK3CA       | mutant_vs_wildtype | UP     | 37          | 176          | 26540      | 464       | 747       | 13.0598342       | 54             | 4.134815              | 4.8237188528869197 | 1.032920e-18  | 2.446743e-15         |
| 4  | M154      | PIK3CA__mutant_vs_wildtype__UP | TCGA-GCC | PIK3CA       | mutant_vs_wildtype | UP     | 37          | 176          | 26540      | 11        | 747       | 0.3096081        | 11             | 35.528782             | Inf                | 8.173152e-18  | 1.753587e-14         |
| 5  | M114      | PIK3CA__mutant_vs_wildtype__DN | TCGA-GCC | PIK3CA       | mutant_vs_wildtype | DN     | 37          | 176          | 26540      | 112       | 631       | 2.6628485        | 24             | 9.012905              | 11.6004284791949   | 1.676868e-16  | 3.108182e-13         |
| 6  | M414      | PIK3CA__mutant_vs_wildtype__DN | TCGA-GCC | PIK3CA       | mutant_vs_wildtype | DN     | 37          | 176          | 26540      | 43        | 631       | 1.0223436        | 15             | 14.672170             | 22.495872720593301 | 3.046798e-14  | 4.345805e-11         |
| 7  | M14       | PIK3CA__mutant_vs_wildtype__UP | TCGA-GCC | PIK3CA       | mutant_vs_wildtype | UP     | 37          | 176          | 26540      | 280       | 747       | 7.8809344        | 35             | 4.441098              | 5.1252769033202599 | 1.740489e-13  | 2.259647e-10         |
| 8  | M404      | PIK3CA__mutant_vs_wildtype__DN | TCGA-GCC | PIK3CA       | mutant_vs_wildtype | DN     | 37          | 176          | 26540      | 61        | 631       | 1.4503014        | 16             | 11.032189             | 14.9417394993597   | 6.501842e-13  | 7.819038e-10         |
| 9  | M403      | PIK3CA__mutant_vs_wildtype__DN | TCGA-GCC | PIK3CA       | mutant_vs_wildtype | DN     | 37          | 176          | 26540      | 285       | 631       | 6.7759985        | 31             | 4.574972              | 5.2176727703365602 | 2.201959e-12  | 2.473528e-09         |
| 10 | M168      | PIK3CA__mutant_vs_wildtype__UP | TCGA-GCC | PIK3CA       | mutant_vs_wildtype | UP     | 37          | 176          | 26540      | 90        | 747       | 2.5331575        | 19             | 7.500521              | 9.4527593072626797 | 6.094758e-12  | 6.382834e-09         |
| 11 | M421      | PIK3CA__mutant_vs_wildtype__DN | TCGA-GCC | PIK3CA       | mutant_vs_wildtype | DN     | 37          | 176          | 26540      | 96        | 631       | 2.2824416        | 18             | 7.886292              | 9.7210347815924205 | 1.130937e-11  | 1.135390e-08         |
| 12 | M640      | PIK3CA__mutant_vs_wildtype__DN | TCGA-GCC | PIK3CA       | mutant_vs_wildtype | DN     | 37          | 176          | 26540      | 85        | 631       | 2.0209118        | 17             | 8.412044              | 10.516956726400201 | 1.426386e-11  | 1.412481e-08         |
| 13 | M656      | PIK3CA__mutant_vs_wildtype__DN | TCGA-GCC | PIK3CA       | mutant_vs_wildtype | DN     | 37          | 176          | 26540      | 55        | 631       | 1.3076488        | 14             | 10.706238             | 14.3057659748993   | 2.836349e-11  | 2.659375e-08         |
| 14 | M680      | PIK3CA__mutant_vs_wildtype__DN | TCGA-GCC | PIK3CA       | mutant_vs_wildtype | DN     | 37          | 176          | 26540      | 80        | 631       | 1.9020347        | 16             | 8.412044              | 10.501579781922601 | 5.689279e-11  | 5.085789e-08         |
| 15 | M210      | PIK3CA__mutant_vs_wildtype__UP | TCGA-GCC | PIK3CA       | mutant_vs_wildtype | UP     | 37          | 176          | 26540      | 59        | 747       | 1.6606255        | 15             | 9.032741              | 11.988145800196    | 6.059004e-11  | 5.381606e-08         |
| 16 | M373      | PIK3CA__mutant_vs_wildtype__UP | TCGA-GCC | PIK3CA       | mutant_vs_wildtype | UP     | 37          | 176          | 26540      | 71        | 747       | 1.9983798        | 15             | 7.506081              | 9.4154325624816302 | 1.015523e-09  | 7.357700e-07         |
| 17 | M740      | PIK3CA__mutant_vs_wildtype__DN | TCGA-GCC | PIK3CA       | mutant_vs_wildtype | DN     | 37          | 176          | 26540      | 24        | 631       | 0.5706104        | 9              | 15.772583             | 24.9467693692987   | 2.180510e-09  | 1.483645e-06         |
| 18 | M642      | PIK3CA__mutant_vs_wildtype__DN | TCGA-GCC | PIK3CA       | mutant_vs_wildtype | DN     | 37          | 176          | 26540      | 52        | 631       | 1.2363225        | 12             | 9.706205              | 12.5329092283232   | 2.547295e-09  | 1.710962e-06         |
| 19 | M399      | PIK3CA__mutant_vs_wildtype__DN | TCGA-GCC | PIK3CA       | mutant_vs_wildtype | DN     | 37          | 176          | 26540      | 644       | 631       | 15.3113791       | 42             | 2.743058              | 2.99739788752666   | 4.578815e-09  | 2.942251e-06         |
| 20 | M427      | PIK3CA__mutant_vs_wildtype__DN | TCGA-GCC | PIK3CA       | mutant_vs_wildtype | DN     | 37          | 176          | 26540      | 500       | 631       | 11.8877167       | 36             | 3.028336              | 3.3176653517175199 | 4.709757e-09  | 3.018762e-06         |
| 21 | M413      | PIK3CA__mutant_vs_wildtype__DN | TCGA-GCC | PIK3CA       | mutant_vs_wildtype | DN     | 37          | 176          | 26540      | 26        | 631       | 0.6181613        | 9              | 14.559308             | 22.026302450524199 | 4.993835e-09  | 3.187452e-06         |
| 22 | M452      | PIK3CA__mutant_vs_wildtype__DN | TCGA-GCC | PIK3CA       | mutant_vs_wildtype | DN     | 37          | 176          | 26540      | 107       | 631       | 2.5439714        | 16             | 6.289379              | 7.3813040200839799 | 5.054955e-09  | 3.223766e-06         |
| 23 | M627      | PIK3CA__mutant_vs_wildtype__UP | TCGA-GCC | PIK3CA       | mutant_vs_wildtype | UP     | 37          | 176          | 26540      | 135       | 747       | 3.7997362        | 19             | 5.000347              | 5.7766561835703198 | 8.461670e-09  | 5.161189e-06         |
| 24 | M170      | PIK3CA__mutant_vs_wildtype__UP | TCGA-GCC | PIK3CA       | mutant_vs_wildtype | UP     | 37          | 176          | 26540      | 72        | 747       | 2.0265260        | 14             | 6.908374              | 8.4730109014750905 | 1.145743e-08  | 6.789879e-06         |
| 25 | M386      | PIK3CA__mutant_vs_wildtype__DN | TCGA-GCC | PIK3CA       | mutant_vs_wildtype | DN     | 37          | 176          | 26540      | 131       | 631       | 3.1145818        | 17             | 5.458197              | 6.2637358717488301 | 1.518662e-08  | 8.795343e-06         |
| 26 | M124      | PIK3CA__mutant_vs_wildtype__DN | TCGA-GCC | PIK3CA       | mutant_vs_wildtype | DN     | 37          | 176          | 26540      | 160       | 631       | 3.8040693        | 18             | 4.731775              | 5.3272141909661004 | 5.507104e-08  | 2.816290e-05         |
| 27 | M111      | PIK3CA__mutant_vs_wildtype__DN | TCGA-GCC | PIK3CA       | mutant_vs_wildtype | DN     | 37          | 176          | 26540      | 787       | 631       | 18.7112660       | 45             | 2.404968              | 2.6044608197108601 | 6.575955e-08  | 3.320592e-05         |
| 28 | M402      | PIK3CA__mutant_vs_wildtype__DN | TCGA-GCC | PIK3CA       | mutant_vs_wildtype | DN     | 37          | 176          | 26540      | 25        | 631       | 0.5943858        | 8              | 13.459271             | 19.548962447584799 | 7.392028e-08  | 3.682695e-05         |
| 29 | M635      | PIK3CA__mutant_vs_wildtype__DN | TCGA-GCC | PIK3CA       | mutant_vs_wildtype | DN     | 37          | 176          | 26540      | 499       | 631       | 11.8639412       | 33             | 2.781538              | 3.01273104203915   | 1.535529e-07  | 7.068266e-05         |
| 30 | M727      | PIK3CA__mutant_vs_wildtype__DN | TCGA-GCC | PIK3CA       | mutant_vs_wildtype | DN     | 37          | 176          | 26540      | 110       | 631       | 2.6152977        | 14             | 5.353119              | 6.1000647811085598 | 3.601141e-07  | 1.507127e-04         |
| 31 | M64       | PIK3CA__mutant_vs_wildtype__UP | TCGA-GCC | PIK3CA       | mutant_vs_wildtype | UP     | 37          | 176          | 26540      | 171       | 747       | 4.8129992        | 19             | 3.947642              | 4.4020068610863099 | 3.923152e-07  | 1.624733e-04         |
| 32 | M371      | PIK3CA__mutant_vs_wildtype__UP | TCGA-GCC | PIK3CA       | mutant_vs_wildtype | UP     | 37          | 176          | 26540      | 59        | 747       | 1.6606255        | 11             | 6.624010              | 8.0152521787070903 | 6.673746e-07  | 2.593805e-04         |
| 33 | M117      | PIK3CA__mutant_vs_wildtype__DN | TCGA-GCC | PIK3CA       | mutant_vs_wildtype | DN     | 37          | 176          | 26540      | 638       | 631       | 15.1687265       | 37             | 2.439229              | 2.6228471029975    | 7.074824e-07  | 2.730634e-04         |
| 34 | M374      | PIK3CA__mutant_vs_wildtype__UP | TCGA-GCC | PIK3CA       | mutant_vs_wildtype | UP     | 37          | 176          | 26540      | 30        | 747       | 0.8443858        | 8              | 9.474342              | 12.6768828427898   | 1.282536e-06  | 4.621440e-04         |
| 35 | M659      | PIK3CA__mutant_vs_wildtype__DN | TCGA-GCC | PIK3CA       | mutant_vs_wildtype | DN     | 37          | 176          | 26540      | 479       | 631       | 11.3884326       | 29             | 2.546443              | 2.7252196990739601 | 4.968543e-06  | 1.506406e-03         |
| 36 | M185      | PIK3CA__mutant_vs_wildtype__UP | TCGA-GCC | PIK3CA       | mutant_vs_wildtype | UP     | 37          | 176          | 26540      | 225       | 747       | 6.3328937        | 20             | 3.158114              | 3.4335171781859901 | 6.507529e-06  | 1.906496e-03         |
| 37 | M10       | PIK3CA__mutant_vs_wildtype__UP | TCGA-GCC | PIK3CA       | mutant_vs_wildtype | UP     | 37          | 176          | 26540      | 142       | 747       | 3.9967596        | 15             | 3.753040              | 4.1408445204824904 | 1.198530e-05  | 3.233993e-03         |
| 38 | M700      | PIK3CA__mutant_vs_wildtype__UP | TCGA-GCC | PIK3CA       | mutant_vs_wildtype | UP     | 37          | 176          | 26540      | 180       | 747       | 5.0663150        | 17             | 3.355496              | 3.6610521886396499 | 1.436974e-05  | 3.773592e-03         |
| 39 | M290      | PIK3CA__mutant_vs_wildtype__UP | TCGA-GCC | PIK3CA       | mutant_vs_wildtype | UP     | 37          | 176          | 26540      | 42        | 747       | 1.1821402        | 8              | 6.767387              | 8.2003341258519793 | 1.919269e-05  | 4.813503e-03         |
| 40 | M209      | PIK3CA__mutant_vs_wildtype__UP | TCGA-GCC | PIK3CA       | mutant_vs_wildtype | UP     | 37          | 176          | 26540      | 243       | 747       | 6.8395252        | 20             | 2.924180              | 3.1541535469265498 | 2.022376e-05  | 5.031969e-03         |
| 41 | M513      | PIK3CA__mutant_vs_wildtype__UP | TCGA-GCC | PIK3CA       | mutant_vs_wildtype | UP     | 37          | 176          | 26540      | 188       | 747       | 5.2914846        | 17             | 3.212709              | 3.48902214965113   | 2.528851e-05  | 6.095789e-03         |
| 42 | M606      | PIK3CA__mutant_vs_wildtype__UP | TCGA-GCC | PIK3CA       | mutant_vs_wildtype | UP     | 37          | 176          | 26540      | 134       | 747       | 3.7715901        | 14             | 3.711962              | 4.08578619222531   | 2.631518e-05  | 6.303919e-03         |
| 43 | M579      | PIK3CA__mutant_vs_wildtype__DN | TCGA-GCC | PIK3CA       | mutant_vs_wildtype | DN     | 37          | 176          | 26540      | 18        | 631       | 0.4279578        | 5              | 11.683395             | 15.9073004320327   | 4.955180e-05  | 1.074949e-02         |
| 44 | M424      | PIK3CA__mutant_vs_wildtype__DN | TCGA-GCC | PIK3CA       | mutant_vs_wildtype | DN     | 37          | 176          | 26540      | 112       | 631       | 2.6628485        | 11             | 4.130915              | 4.5326708082580103 | 7.530086e-05  | 1.520352e-02         |
| 45 | M311      | PIK3CA__mutant_vs_wildtype__UP | TCGA-GCC | PIK3CA       | mutant_vs_wildtype | UP     | 37          | 176          | 26540      | 148       | 747       | 4.1656368        | 14             | 3.360831              | 3.6566242262764002 | 7.899377e-05  | 1.581932e-02         |
| 46 | M534      | PIK3CA__mutant_vs_wildtype__UP | TCGA-GCC | PIK3CA       | mutant_vs_wildtype | UP     | 37          | 176          | 26540      | 186       | 747       | 5.2351922        | 16             | 3.056239              | 3.2987155144709401 | 7.900304e-05  | 1.582014e-02         |
| 47 | M20       | PIK3CA__mutant_vs_wildtype__UP | TCGA-GCC | PIK3CA       | mutant_vs_wildtype | UP     | 37          | 176          | 26540      | 496       | 747       | 13.9605124       | 30             | 2.148918              | 2.2737991590750699 | 8.316756e-05  | 1.648742e-02         |
| 48 | M6        | TP53__mutant_vs_wildtype__DN   | TCGA-GCC | TP53         | mutant_vs_wildtype | DN     | 71          | 142          | 26540      | 2276      | 219       | 18.7808591       | 168            | 8.945278              | 37.820004177451501 | 7.283606e-134 | 1.111102e-127        |
| 49 | M102      | TP53__mutant_vs_wildtype__DN   | TCGA-GCC | TP53         | mutant_vs_wildtype | DN     | 71          | 142          | 26540      | 322       | 219       | 2.6570460        | 56             | 21.076037             | 33.627672191515003 | 4.756236e-58  | 3.154590e-53         |
| 50 | M357      | TP53__mutant_vs_wildtype__DN   | TCGA-GCC | TP53         | mutant_vs_wildtype | DN     | 71          | 142          | 26540      | 138       | 219       | 1.1387340        | 32             | 28.101383             | 42.266519400378897 | 2.223445e-37  | 3.245768e-33         |

|    | module id | mutation signature id        | cohort   | mutated.gene | comparison         | DEG.ID | num.mutated | num.wildtype | Background | set1_size | set2_size | expected.overlap | actual.overlap | enrichment.foldchange | odds.ratio         | FET_pvalue   | corrected.FET.pvalue |
|----|-----------|------------------------------|----------|--------------|--------------------|--------|-------------|--------------|------------|-----------|-----------|------------------|----------------|-----------------------|--------------------|--------------|----------------------|
| 1  | M378      | TP53__mutant_vs_wildtype__DN | TCGA-GCC | TP53         | mutant_vs_wildtype | DN     | 71          | 142          | 26540      | 464       | 219       | 3.82878674       | 45             | 11.753070             | 15.9826871121568   | 8.424652e-35 | 8.802509e-31         |
| 2  | M105      | TP53__mutant_vs_wildtype__DN | TCGA-GCC | TP53         | mutant_vs_wildtype | DN     | 71          | 142          | 26540      | 328       | 219       | 2.70655614       | 39             | 14.409455             | 19.504255160965901 | 1.389736e-33 | 1.300625e-29         |
| 3  | M106      | TP53__mutant_vs_wildtype__DN | TCGA-GCC | TP53         | mutant_vs_wildtype | DN     | 71          | 142          | 26540      | 549       | 219       | 4.53018086       | 46             | 10.154120             | 13.6378780982413   | 9.798406e-33 | 8.101519e-29         |
| 4  | M373      | TP53__mutant_vs_wildtype__DN | TCGA-GCC | TP53         | mutant_vs_wildtype | DN     | 71          | 142          | 26540      | 71        | 219       | 0.58587038       | 22             | 37.550968             | 59.791627691439103 | 4.333316e-29 | 2.617980e-25         |
| 5  | M371      | TP53__mutant_vs_wildtype__DN | TCGA-GCC | TP53         | mutant_vs_wildtype | DN     | 71          | 142          | 26540      | 59        | 219       | 0.48685004       | 11             | 22.594226             | 28.9316888586083   | 1.856410e-12 | 2.107085e-09         |
| 6  | M104      | TP53__mutant_vs_wildtype__DN | TCGA-GCC | TP53         | mutant_vs_wildtype | DN     | 71          | 142          | 26540      | 244       | 219       | 2.01341372       | 18             | 8.940040              | 10.3365781439313   | 2.331568e-12 | 2.602830e-09         |
| 7  | M367      | TP53__mutant_vs_wildtype__DN | TCGA-GCC | TP53         | mutant_vs_wildtype | DN     | 71          | 142          | 26540      | 134       | 219       | 1.10572720       | 13             | 11.756969             | 13.663624906633601 | 9.450133e-11 | 8.128569e-08         |
| 8  | M358      | TP53__mutant_vs_wildtype__DN | TCGA-GCC | TP53         | mutant_vs_wildtype | DN     | 71          | 142          | 26540      | 65        | 219       | 0.53636021       | 10             | 18.644187             | 22.830091268705299 | 1.435294e-10 | 1.206013e-07         |
| 9  | M77       | TP53__mutant_vs_wildtype__UP | TCGA-GCC | TP53         | mutant_vs_wildtype | UP     | 71          | 142          | 26540      | 60        | 134       | 0.30293896       | 8              | 26.407960             | 32.148707569543497 | 7.016499e-10 | 5.208540e-07         |
| 10 | M227      | TP53__mutant_vs_wildtype__UP | TCGA-GCC | TP53         | mutant_vs_wildtype | UP     | 71          | 142          | 26540      | 12        | 134       | 0.06058779       | 5              | 82.524876             | 145.142061492067   | 2.343103e-09 | 1.586843e-06         |
| 11 | M29       | TP53__mutant_vs_wildtype__UP | TCGA-GCC | TP53         | mutant_vs_wildtype | UP     | 71          | 142          | 26540      | 71        | 134       | 0.35847777       | 8              | 22.316586             | 26.539252229016501 | 2.785063e-09 | 1.856844e-06         |
| 12 | M207      | TP53__mutant_vs_wildtype__UP | TCGA-GCC | TP53         | mutant_vs_wildtype | UP     | 71          | 142          | 26540      | 27        | 134       | 0.13632253       | 6              | 44.013267             | 58.770992654912398 | 4.015251e-09 | 2.605912e-06         |
| 13 | M627      | TP53__mutant_vs_wildtype__DN | TCGA-GCC | TP53         | mutant_vs_wildtype | DN     | 71          | 142          | 26540      | 135       | 219       | 1.11397890       | 11             | 9.874514              | 11.1700202955536   | 1.717203e-08 | 9.816615e-06         |
| 14 | M185      | TP53__mutant_vs_wildtype__UP | TCGA-GCC | TP53         | mutant_vs_wildtype | UP     | 71          | 142          | 26540      | 225       | 134       | 1.13602110       | 11             | 9.682919              | 10.945482882921    | 2.099211e-08 | 1.177320e-05         |
| 15 | M700      | TP53__mutant_vs_wildtype__UP | TCGA-GCC | TP53         | mutant_vs_wildtype | UP     | 71          | 142          | 26540      | 180       | 134       | 0.90881688       | 10             | 11.003317             | 12.4410424011924   | 2.827960e-08 | 1.543196e-05         |
| 16 | M513      | TP53__mutant_vs_wildtype__UP | TCGA-GCC | TP53         | mutant_vs_wildtype | UP     | 71          | 142          | 26540      | 188       | 134       | 0.94920874       | 10             | 10.535091             | 11.878503822106    | 4.269007e-08 | 2.239442e-05         |
| 17 | M301      | TP53__mutant_vs_wildtype__UP | TCGA-GCC | TP53         | mutant_vs_wildtype | UP     | 71          | 142          | 26540      | 113       | 134       | 0.57053504       | 8              | 14.021926             | 15.8961163984391   | 1.121849e-07 | 5.343832e-05         |
| 18 | M163      | TP53__mutant_vs_wildtype__UP | TCGA-GCC | TP53         | mutant_vs_wildtype | UP     | 71          | 142          | 26540      | 24        | 134       | 0.12117558       | 5              | 41.262438             | 53.7255687551771   | 1.197739e-07 | 5.648881e-05         |
| 19 | M70       | TP53__mutant_vs_wildtype__UP | TCGA-GCC | TP53         | mutant_vs_wildtype | UP     | 71          | 142          | 26540      | 47        | 134       | 0.23730219       | 6              | 25.284217             | 30.120044722386599 | 1.340860e-07 | 6.248372e-05         |
| 20 | M60       | TP53__mutant_vs_wildtype__UP | TCGA-GCC | TP53         | mutant_vs_wildtype | UP     | 71          | 142          | 26540      | 147       | 134       | 0.74220045       | 8              | 10.778759             | 11.9935761854332   | 8.461680e-07 | 3.191137e-04         |
| 21 | M361      | TP53__mutant_vs_wildtype__DN | TCGA-GCC | TP53         | mutant_vs_wildtype | DN     | 71          | 142          | 26540      | 27        | 219       | 0.22279578       | 5              | 22.442077             | 27.890070470919699 | 2.544649e-06 | 8.446999e-04         |
| 22 | M759      | TP53__mutant_vs_wildtype__UP | TCGA-GCC | TP53         | mutant_vs_wildtype | UP     | 71          | 142          | 26540      | 20        | 134       | 0.10097965       | 4              | 39.611940             | 50.646847939864898 | 2.827030e-06 | 9.240595e-04         |
| 23 | M600      | TP53__mutant_vs_wildtype__UP | TCGA-GCC | TP53         | mutant_vs_wildtype | UP     | 71          | 142          | 26540      | 48        | 134       | 0.24235117       | 5              | 20.631219             | 23.729181382959499 | 4.378364e-06 | 1.351091e-03         |
| 24 | M20       | TP53__mutant_vs_wildtype__UP | TCGA-GCC | TP53         | mutant_vs_wildtype | UP     | 71          | 142          | 26540      | 496       | 134       | 2.50429540       | 12             | 4.791767              | 5.26664750557297   | 8.525780e-06 | 2.408060e-03         |
| 25 | M30       | TP53__mutant_vs_wildtype__UP | TCGA-GCC | TP53         | mutant_vs_wildtype | UP     | 71          | 142          | 26540      | 59        | 134       | 0.29788998       | 5              | 16.784720             | 18.904041670224601 | 1.224456e-05 | 3.290559e-03         |
| 26 | M715      | TP53__mutant_vs_wildtype__UP | TCGA-GCC | TP53         | mutant_vs_wildtype | UP     | 71          | 142          | 26540      | 30        | 134       | 0.15146948       | 4              | 26.407960             | 31.192203607239801 | 1.537656e-05 | 3.995346e-03         |
| 27 | M464      | TP53__mutant_vs_wildtype__UP | TCGA-GCC | TP53         | mutant_vs_wildtype | UP     | 71          | 142          | 26540      | 19        | 134       | 0.09593067       | 3              | 31.272584             | 37.663010657186803 | 1.149392e-04 | 2.149539e-02         |
| 28 | M13       | TP53__mutant_vs_wildtype__UP | TCGA-GCC | TP53         | mutant_vs_wildtype | UP     | 71          | 142          | 26540      | 104       | 134       | 0.52509420       | 5              | 9.522101              | 10.293991296924499 | 1.875979e-04 | 3.217284e-02         |
| 29 | M26       | TP53__mutant_vs_wildtype__UP | TCGA-GCC | TP53         | mutant_vs_wildtype | UP     | 71          | 142          | 26540      | 821       | 134       | 4.14521477       | 13             | 3.136146              | 3.4034050164151401 | 2.738634e-04 | 4.379870e-02         |
| 30 | M413      | TP53__mutant_vs_wildtype__UP | TCGA-GCC | TP53         | mutant_vs_wildtype | UP     | 71          | 142          | 26540      | 26        | 134       | 0.13127355       | 3              | 22.853042             | 26.264486881509999 | 3.005306e-04 | 4.731944e-02         |









Supporting Material 5A: ESTIMATE score

|     | ID              | Stromal_score | Immune_score | ESTIMATE_score |
|-----|-----------------|---------------|--------------|----------------|
| 1   | TCGA-D7-6521-01 | 1015.80       | 1339.97      | 2355.77        |
| 2   | TCGA-VQ-A91K-01 | -86.84        | 631.61       | 544.77         |
| 3   | TCGA-CG-4462-01 | 2073.37       | 1920.57      | 3993.94        |
| 4   | TCGA-D7-6519-01 | -539.10       | -117.69      | -656.79        |
| 5   | TCGA-HU-A4GN-01 | -822.75       | 89.01        | -733.74        |
| 6   | TCGA-IN-A6RS-01 | -716.06       | 673.48       | -42.59         |
| 7   | TCGA-FP-7998-01 | 1254.44       | 2454.52      | 3708.97        |
| 8   | TCGA-EQ-A4SO-01 | -1437.50      | -560.20      | -1997.69       |
| 9   | TCGA-CG-5719-01 | 1063.59       | 878.70       | 1942.29        |
| 10  | TCGA-BR-6458-01 | 812.20        | 1257.51      | 2069.72        |
| 11  | TCGA-BR-4369-01 | 213.68        | 578.74       | 792.42         |
| 12  | TCGA-BR-7717-01 | -18.78        | 74.72        | 55.94          |
| 13  | TCGA-FP-8211-01 | -1044.69      | 348.68       | -696.02        |
| 14  | TCGA-CD-5804-01 | 580.83        | 924.03       | 1504.86        |
| 15  | TCGA-BR-8296-01 | 27.70         | 1364.22      | 1391.92        |
| 16  | TCGA-CG-4475-01 | 757.51        | 197.33       | 954.84         |
| 17  | TCGA-IN-A6RO-01 | -1534.45      | -348.01      | -1882.46       |
| 18  | TCGA-CD-8527-01 | -613.25       | 72.24        | -541.01        |
| 19  | TCGA-CG-5726-01 | -1392.16      | -339.94      | -1732.10       |
| 20  | TCGA-CD-8530-01 | 1130.03       | 481.83       | 1611.87        |
| 21  | TCGA-VQ-A8DT-01 | -1348.88      | -336.03      | -1684.90       |
| 22  | TCGA-CG-5721-01 | 344.15        | 2297.62      | 2641.77        |
| 23  | TCGA-VQ-A91Y-01 | 959.31        | 1182.34      | 2141.65        |
| 24  | TCGA-BR-7958-01 | 612.09        | 2111.97      | 2724.06        |
| 25  | TCGA-BR-8373-01 | 503.98        | 14.33        | 518.30         |
| 26  | TCGA-VQ-A91D-01 | -161.63       | 407.01       | 245.38         |
| 27  | TCGA-VQ-AA68-01 | -1034.73      | 193.61       | -841.12        |
| 28  | TCGA-RD-A8NB-01 | 394.73        | 1091.46      | 1486.19        |
| 29  | TCGA-CD-A48A-01 | -551.69       | 45.93        | -505.75        |
| 30  | TCGA-VQ-A927-01 | -298.29       | 161.53       | -136.76        |
| 31  | TCGA-HU-A4G9-01 | -1834.98      | -717.51      | -2552.49       |
| 32  | TCGA-CG-4436-01 | -814.33       | 625.09       | -189.24        |
| 33  | TCGA-BR-4280-01 | -572.60       | 690.15       | 117.55         |
| 34  | TCGA-RD-A7BW-01 | 1593.70       | 1755.11      | 3348.81        |
| 35  | TCGA-BR-4255-01 | 1367.70       | 937.26       | 2304.96        |
| 36  | TCGA-VQ-A94O-01 | -706.22       | -110.41      | -816.63        |
| 37  | TCGA-BR-A4PF-01 | -292.83       | 1062.97      | 770.14         |
| 38  | TCGA-VQ-A8PP-01 | -95.17        | 358.76       | 263.59         |
| 39  | TCGA-HU-A4GH-01 | -1838.38      | -62.50       | -1900.88       |
| 40  | TCGA-FP-7829-01 | -11.62        | -46.16       | -57.78         |
| 41  | TCGA-F1-A72C-01 | 234.30        | 570.52       | 804.83         |
| 42  | TCGA-HJ-7597-01 | -1050.87      | 434.51       | -616.37        |
| 43  | TCGA-F1-A448-01 | 568.15        | 1262.05      | 1830.21        |
| 44  | TCGA-CD-8525-01 | 95.69         | 1010.20      | 1105.89        |
| 45  | TCGA-IN-A6RJ-01 | -1443.63      | -271.51      | -1715.14       |
| 46  | TCGA-HU-8604-01 | 507.86        | 1743.54      | 2251.40        |
| 47  | TCGA-BR-8678-01 | -327.97       | -510.93      | -838.90        |
| 48  | TCGA-VQ-A8E3-01 | -717.00       | 810.42       | 93.42          |
| 49  | TCGA-BR-A4J4-01 | 36.83         | 513.74       | 550.57         |
| 50  | TCGA-VQ-A91V-01 | -1453.79      | -523.75      | -1977.55       |
| 51  | TCGA-BR-4292-01 | -504.81       | 873.48       | 368.67         |
| 52  | TCGA-HU-A4H0-01 | -769.08       | 1102.75      | 333.67         |
| 53  | TCGA-D7-6518-01 | 1472.57       | 875.67       | 2348.23        |
| 54  | TCGA-HU-A4G2-01 | -300.64       | 404.88       | 104.23         |
| 55  | TCGA-BR-A4J7-01 | 1136.15       | 1612.96      | 2749.11        |
| 56  | TCGA-BR-4361-01 | 970.42        | 1074.69      | 2045.11        |
| 57  | TCGA-BR-6452-01 | 36.37         | 702.88       | 739.26         |
| 58  | TCGA-CD-A486-01 | 55.79         | 383.23       | 439.02         |
| 59  | TCGA-BR-6802-01 | -122.55       | 1184.86      | 1062.31        |
| 60  | TCGA-KB-A93H-01 | -1674.34      | -268.78      | -1943.12       |
| 61  | TCGA-BR-6563-01 | 1529.82       | 2026.70      | 3556.53        |
| 62  | TCGA-RD-A7BT-01 | -1340.26      | -123.59      | -1463.85       |
| 63  | TCGA-R5-A7ZI-01 | -389.24       | 1775.92      | 1386.68        |
| 64  | TCGA-BR-A4CS-01 | 69.37         | 253.83       | 323.20         |
| 65  | TCGA-CG-4305-01 | 798.73        | 1390.92      | 2189.65        |
| 66  | TCGA-CG-4460-01 | -486.96       | -58.20       | -545.17        |
| 67  | TCGA-KB-A93J-01 | -313.82       | 1100.60      | 786.78         |
| 68  | TCGA-CG-4449-01 | 1142.72       | 502.23       | 1644.96        |
| 69  | TCGA-BR-6803-01 | 1148.95       | 1085.54      | 2234.49        |
| 70  | TCGA-RD-A7BS-01 | 118.64        | 961.59       | 1080.22        |
| 71  | TCGA-BR-8080-01 | 1379.09       | 1179.53      | 2558.63        |
| 72  | TCGA-BR-8362-01 | 752.73        | 806.33       | 1559.07        |
| 73  | TCGA-BR-4267-01 | -304.89       | 417.28       | 112.39         |
| 74  | TCGA-BR-6801-01 | 95.27         | -181.43      | -86.16         |
| 75  | TCGA-VQ-A8P8-01 | 19.53         | 589.26       | 608.80         |
| 76  | TCGA-BR-7704-01 | -29.53        | 1658.79      | 1629.26        |
| 77  | TCGA-D7-8575-01 | -233.50       | 984.56       | 751.05         |
| 78  | TCGA-CD-A4MH-01 | -401.18       | 17.10        | -384.08        |
| 79  | TCGA-BR-A4J8-01 | 379.26        | 79.37        | 458.63         |
| 80  | TCGA-BR-4363-01 | 850.93        | 1145.91      | 1996.84        |
| 81  | TCGA-HU-A4H6-01 | -271.89       | 794.49       | 522.60         |
| 82  | TCGA-B7-A5TN-01 | 517.68        | 132.77       | 650.45         |
| 83  | TCGA-FP-7916-01 | 914.94        | 1828.31      | 2743.25        |
| 84  | TCGA-D7-5577-01 | -58.92        | 1640.37      | 1581.45        |
| 85  | TCGA-CG-5722-01 | 231.49        | 2198.65      | 2430.14        |
| 86  | TCGA-BR-6565-01 | 424.76        | 981.34       | 1406.10        |
| 87  | TCGA-VQ-AA64-01 | 262.48        | -320.29      | -57.81         |
| 88  | TCGA-CD-8526-01 | -28.22        | 194.54       | 166.32         |
| 89  | TCGA-D7-A747-01 | 810.55        | 1141.05      | 1951.60        |
| 90  | TCGA-BR-4256-01 | 1678.99       | 2123.52      | 3802.51        |
| 91  | TCGA-BR-4187-01 | 2085.81       | 1705.01      | 3790.82        |
| 92  | TCGA-D7-5578-01 | 302.42        | 924.30       | 1226.72        |
| 93  | TCGA-BR-7196-01 | 1258.71       | 1272.84      | 2531.54        |
| 94  | TCGA-BR-4191-01 | 942.20        | 1851.53      | 2793.73        |
| 95  | TCGA-VQ-A924-01 | -246.08       | 449.95       | 203.87         |
| 96  | TCGA-VQ-A8PD-01 | 486.58        | 1626.47      | 2113.06        |
| 97  | TCGA-VQ-A91S-01 | -623.97       | 525.84       | -98.13         |
| 98  | TCGA-D7-8570-01 | 768.92        | 2255.26      | 3024.18        |
| 99  | TCGA-IN-AB1V-01 | -1414.23      | -299.70      | -1713.93       |
| 100 | TCGA-SW-A7EB-01 | -727.36       | 401.92       | -325.44        |

|     | ID              | Stromal_score | Immune_score | ESTIMATE_score |
|-----|-----------------|---------------|--------------|----------------|
| 1   | TCGA-CG-4465-01 | 556.75        | 1001.07      | 1557.82        |
| 2   | TCGA-R5-A7ZR-01 | -1263.69      | -175.26      | -1438.95       |
| 3   | TCGA-IN-A7NT-01 | -393.95       | -278.21      | -672.17        |
| 4   | TCGA-CG-4441-01 | 421.75        | 451.68       | 873.43         |
| 5   | TCGA-ZQ-A9CR-01 | 801.81        | 847.55       | 1649.36        |
| 6   | TCGA-VQ-A8PE-01 | -580.05       | 267.32       | -312.72        |
| 7   | TCGA-BR-8486-01 | 255.03        | 744.67       | 999.70         |
| 8   | TCGA-BR-6453-01 | 911.58        | 2404.23      | 3315.82        |
| 9   | TCGA-BR-4294-01 | -897.55       | -637.19      | -1534.75       |
| 10  | TCGA-VQ-A91Q-01 | 43.35         | -472.76      | -429.41        |
| 11  | TCGA-VQ-AA6D-01 | -1529.45      | -727.36      | -2256.81       |
| 12  | TCGA-CG-5732-01 | -878.92       | 1180.33      | 301.41         |
| 13  | TCGA-RD-A8N4-01 | 666.93        | 605.61       | 1272.54        |
| 14  | TCGA-HU-8608-01 | 319.12        | 2093.47      | 2412.59        |
| 15  | TCGA-HF-A5NB-01 | -1202.22      | 103.92       | -1098.31       |
| 16  | TCGA-BR-8687-01 | -243.05       | -273.15      | -516.20        |
| 17  | TCGA-BR-8683-01 | 590.02        | 268.52       | 858.54         |
| 18  | TCGA-CD-A4MJ-01 | -276.80       | -41.16       | -317.96        |
| 19  | TCGA-CD-5800-01 | -826.55       | -160.59      | -987.14        |
| 20  | TCGA-BR-8382-01 | 387.21        | 814.77       | 1201.98        |
| 21  | TCGA-BR-8588-01 | 798.81        | 1196.87      | 1995.67        |
| 22  | TCGA-BR-8487-01 | -364.36       | 515.76       | 151.40         |
| 23  | TCGA-BR-6457-01 | 1507.37       | 1035.79      | 2543.17        |
| 24  | TCGA-CD-8533-01 | -482.03       | -1143.65     | -1625.68       |
| 25  | TCGA-BR-A452-01 | -1061.49      | -736.32      | -1797.81       |
| 26  | TCGA-BR-8368-01 | -1036.93      | 138.15       | -898.78        |
| 27  | TCGA-BR-A44U-01 | -120.80       | -428.33      | -549.12        |
| 28  | TCGA-BR-A4J5-01 | 1204.34       | 694.71       | 1899.05        |
| 29  | TCGA-MX-A666-01 | -942.84       | 35.98        | -906.86        |
| 30  | TCGA-D7-6818-01 | 1110.53       | 1061.51      | 2172.04        |
| 31  | TCGA-VQ-A922-01 | 283.75        | -596.63      | -312.88        |
| 32  | TCGA-ZA-A8F6-01 | 715.89        | 908.31       | 1624.20        |
| 33  | TCGA-R5-A7O7-01 | -246.51       | 328.39       | 81.89          |
| 34  | TCGA-VQ-A8PM-01 | 168.08        | 1039.59      | 1207.67        |
| 35  | TCGA-VQ-A8DU-01 | -374.57       | -201.18      | -575.75        |
| 36  | TCGA-BR-4201-01 | 1373.95       | 1185.14      | 2559.09        |
| 37  | TCGA-CD-A489-01 | 686.70        | 714.09       | 1400.79        |
| 38  | TCGA-D7-8572-01 | 902.04        | 699.71       | 1601.75        |
| 39  | TCGA-IN-A6RR-01 | -1001.88      | -192.66      | -1194.54       |
| 40  | TCGA-BR-7197-01 | -410.89       | -721.90      | -1132.78       |
| 41  | TCGA-D7-6524-01 | 1210.13       | 1086.67      | 2296.79        |
| 42  | TCGA-CG-5725-01 | -1036.02      | -989.65      | -2025.67       |
| 43  | TCGA-FP-A4BF-01 | 1171.61       | 2130.93      | 3302.54        |
| 44  | TCGA-VQ-A91E-01 | -1388.70      | 419.58       | -969.12        |
| 45  | TCGA-CG-4474-01 | 922.56        | 1297.28      | 2219.84        |
| 46  | TCGA-BR-4279-01 | 2053.43       | 1643.55      | 3696.98        |
| 47  | TCGA-BR-8384-01 | 1465.35       | 903.76       | 2369.11        |
| 48  | TCGA-D7-A6EY-01 | 207.98        | 1535.89      | 1743.87        |
| 49  | TCGA-EQ-8122-01 | 53.17         | -233.94      | -180.76        |
| 50  | TCGA-BR-8363-01 | 384.88        | 1678.52      | 2063.40        |
| 51  | TCGA-D7-A74A-01 | -1340.73      | 31.22        | -1309.51       |
| 52  | TCGA-BR-4257-01 | 734.80        | 1217.14      | 1951.95        |
| 53  | TCGA-B7-A5TK-01 | 886.36        | 2084.89      | 2971.24        |
| 54  | TCGA-CG-4440-01 | -795.98       | 147.02       | -648.97        |
| 55  | TCGA-BR-8590-01 | 1146.88       | 1037.22      | 2184.10        |
| 56  | TCGA-HF-7136-01 | -127.63       | -443.50      | -571.14        |
| 57  | TCGA-RD-A8N1-01 | 461.44        | 1875.80      | 2337.24        |
| 58  | TCGA-HU-A4GF-01 | -884.98       | 161.37       | -723.61        |
| 59  | TCGA-BR-AAJ1-01 | -1039.91      | -1169.12     | -2209.03       |
| 60  | TCGA-IN-7806-01 | -863.28       | -316.70      | -1179.98       |
| 61  | TCGA-CG-5718-01 | -169.07       | 940.40       | 771.33         |
| 62  | TCGA-FP-A9TM-01 | -1071.55      | 1017.92      | -53.62         |
| 63  | TCGA-D7-6526-01 | -741.60       | -347.55      | -1089.15       |
| 64  | TCGA-CD-8532-01 | 303.13        | 1503.41      | 1806.55        |
| 65  | TCGA-CG-5734-01 | 140.59        | 1936.28      | 2076.87        |
| 66  | TCGA-VQ-A8PF-01 | 642.29        | 1962.04      | 2604.34        |
| 67  | TCGA-BR-6564-01 | 1271.10       | 877.02       | 2148.11        |
| 68  | TCGA-HU-8244-01 | -1892.02      | -518.85      | -2410.86       |
| 69  | TCGA-R5-A805-01 | 583.90        | 1622.05      | 2205.95        |
| 70  | TCGA-VQ-A91Z-01 | -1769.32      | -1110.86     | -2880.18       |
| 71  | TCGA-BR-8059-01 | 628.99        | -316.14      | 312.85         |
| 72  | TCGA-HU-8610-01 | 325.12        | 1381.18      | 1706.30        |
| 73  | TCGA-BR-A44T-01 | 749.38        | 2509.85      | 3259.23        |
| 74  | TCGA-HU-8602-01 | -78.44        | 1178.07      | 1099.63        |
| 75  | TCGA-CD-A487-01 | 35.16         | -231.45      | -196.29        |
| 76  | TCGA-BR-A4QM-01 | -186.21       | 1280.99      | 1094.78        |
| 77  | TCGA-HU-A4H8-01 | -1426.50      | -143.95      | -1570.45       |
| 78  | TCGA-BR-8289-01 | 194.72        | -115.95      | 78.78          |
| 79  | TCGA-CD-8529-01 | 1070.99       | 1749.14      | 2820.13        |
| 80  | TCGA-BR-A4PD-01 | -333.94       | 825.26       | 491.32         |
| 81  | TCGA-D7-A6EV-01 | -1166.87      | -488.03      | -1654.90       |
| 82  | TCGA-BR-8364-01 | 1658.21       | 1008.33      | 2666.54        |
| 83  | TCGA-CG-4301-01 | 703.08        | 776.66       | 1479.74        |
| 84  | TCGA-BR-8361-01 | -505.76       | 633.49       | 127.73         |
| 85  | TCGA-VQ-AA6F-01 | -702.05       | 565.72       | -136.33        |
| 86  | TCGA-BR-7723-01 | 22.12         | 346.53       | 368.65         |
| 87  | TCGA-HF-7134-01 | -500.86       | 263.55       | -237.32        |
| 88  | TCGA-RD-A8N9-01 | 1318.02       | 986.08       | 2304.10        |
| 89  | TCGA-CG-4469-01 | -336.22       | 659.11       | 322.89         |
| 90  | TCGA-CG-4438-01 | -40.18        | 1109.38      | 1069.20        |
| 91  | TCGA-VQ-A8PX-01 | -1526.91      | 107.99       | -1418.92       |
| 92  | TCGA-CD-5799-01 | -283.60       | -194.53      | -478.13        |
| 93  | TCGA-CD-8535-01 | -790.96       | -896.89      | -1687.85       |
| 94  | TCGA-FP-8210-01 | 1546.01       | 2008.71      | 3554.72        |
| 95  | TCGA-RD-A8N0-01 | 871.28        | 2029.42      | 2900.70        |
| 96  | TCGA-BR-8372-01 | -250.32       | 1277.21      | 1026.90        |
| 97  | TCGA-CD-5798-01 | 987.66        | 835.64       | 1823.30        |
| 98  | TCGA-CG-5717-01 | -225.17       | 924.68       | 699.51         |
| 99  | TCGA-BR-8297-01 | 556.08        | 139.83       | 695.92         |
| 100 | TCGA-CG-4476-01 | 1168.02       | 1209.50      | 2377.51        |

|     | ID              | Stromal_score | Immune_score | ESTIMATE_score |
|-----|-----------------|---------------|--------------|----------------|
| 1   | TCGA-BR-8592-01 | 1306.04       | 864.02       | 2170.05        |
| 2   | TCGA-D7-6817-01 | -585.77       | 367.32       | -218.45        |
| 3   | TCGA-VQ-A8PJ-01 | -1228.91      | -560.77      | -1789.69       |
| 4   | TCGA-BR-8381-01 | 819.99        | 1854.68      | 2674.67        |
| 5   | TCGA-RD-A8MW-01 | 893.97        | 1485.32      | 2379.29        |
| 6   | TCGA-VQ-AA6I-01 | -831.74       | 232.23       | -599.51        |
| 7   | TCGA-D7-6522-01 | 1904.47       | 2754.43      | 4658.90        |
| 8   | TCGA-D7-6528-01 | -1051.70      | -422.65      | -1474.35       |
| 9   | TCGA-CD-A4MI-01 | 1306.12       | 1971.69      | 3277.81        |
| 10  | TCGA-BR-4368-01 | 552.74        | 1142.07      | 1694.81        |
| 11  | TCGA-HU-A4G8-01 | -518.96       | 587.49       | 68.53          |
| 12  | TCGA-BR-8484-01 | 423.83        | 1324.47      | 1748.30        |
| 13  | TCGA-B7-5818-01 | -232.11       | 1182.91      | 950.80         |
| 14  | TCGA-F1-6177-01 | -915.47       | -155.87      | -1071.34       |
| 15  | TCGA-BR-A4J9-01 | 748.32        | 428.48       | 1176.80        |
| 16  | TCGA-3M-AB47-01 | 932.88        | 635.88       | 1568.76        |
| 17  | TCGA-VQ-A91X-01 | -1957.19      | -900.36      | -2857.55       |
| 18  | TCGA-D7-6820-01 | -970.81       | 168.23       | -802.58        |
| 19  | TCGA-BR-7901-01 | 853.88        | 708.76       | 1562.64        |
| 20  | TCGA-BR-8483-01 | -800.36       | -808.39      | -1608.75       |
| 21  | TCGA-D7-6520-01 | 342.14        | 102.69       | 444.84         |
| 22  | TCGA-HU-A4GC-01 | -276.74       | 17.09        | -259.65        |
| 23  | TCGA-VQ-A8P5-01 | -6.74         | 150.20       | 143.45         |
| 24  | TCGA-RD-A8N5-01 | 1317.24       | 1221.90      | 2539.15        |
| 25  | TCGA-D7-8573-01 | -1066.25      | -137.91      | -1204.16       |
| 26  | TCGA-CG-4443-01 | -343.67       | -663.34      | -1007.01       |
| 27  | TCGA-BR-8077-01 | -38.01        | 1041.87      | 1003.86        |
| 28  | TCGA-BR-A4IU-01 | 1051.71       | 1163.72      | 2215.43        |
| 29  | TCGA-VQ-A8PU-01 | -1209.35      | -489.64      | -1698.99       |
| 30  | TCGA-BR-7959-01 | 1114.63       | 303.65       | 1418.29        |
| 31  | TCGA-BR-A4J6-01 | -183.18       | -145.69      | -328.87        |
| 32  | TCGA-BR-A4IV-01 | 1430.55       | 218.87       | 1649.42        |
| 33  | TCGA-VQ-A94P-01 | 1261.31       | 711.74       | 1973.04        |
| 34  | TCGA-HU-A4GQ-01 | 31.28         | 303.82       | 335.10         |
| 35  | TCGA-BR-4362-01 | -37.81        | 1064.20      | 1026.39        |
| 36  | TCGA-BR-7707-01 | -345.39       | 409.22       | 63.83          |
| 37  | TCGA-IN-7808-01 | -43.63        | 2591.55      | 2547.91        |
| 38  | TCGA-D7-8578-01 | 885.42        | 345.58       | 1230.99        |
| 39  | TCGA-CD-5801-01 | -94.05        | 1802.27      | 1708.22        |
| 40  | TCGA-BR-6705-01 | 1676.19       | 622.60       | 2298.80        |
| 41  | TCGA-BR-8295-01 | -1294.23      | -1568.74     | -2862.97       |
| 42  | TCGA-D7-A6EZ-01 | 125.37        | 1276.29      | 1401.66        |
| 43  | TCGA-HU-A4GX-01 | -706.36       | 1064.96      | 358.60         |
| 44  | TCGA-R5-A7ZF-01 | -1416.21      | -759.08      | -2175.29       |
| 45  | TCGA-CG-5720-01 | 330.71        | 1198.36      | 1529.07        |
| 46  | TCGA-MX-A5UJ-01 | 212.26        | 97.85        | 310.11         |
| 47  | TCGA-CG-5723-01 | 16.03         | 1484.80      | 1500.84        |
| 48  | TCGA-D7-6525-01 | 125.64        | 195.75       | 321.39         |
| 49  | TCGA-BR-8485-01 | 319.10        | 570.96       | 890.06         |
| 50  | TCGA-CG-4466-01 | -1112.21      | -518.91      | -1631.12       |
| 51  | TCGA-BR-6709-01 | 1080.72       | 2140.85      | 3221.57        |
| 52  | TCGA-BR-A4IZ-01 | 1935.09       | 1148.97      | 3084.07        |
| 53  | TCGA-IN-A6RL-01 | -785.32       | -25.10       | -810.41        |
| 54  | TCGA-VQ-A94T-01 | -870.18       | -824.36      | -1694.54       |
| 55  | TCGA-F1-6874-01 | 241.14        | 928.26       | 1169.41        |
| 56  | TCGA-VQ-A91N-01 | -1140.32      | -375.30      | -1515.62       |
| 57  | TCGA-VQ-A8E7-01 | -529.27       | -419.00      | -948.27        |
| 58  | TCGA-BR-8591-01 | -37.11        | 542.60       | 505.50         |
| 59  | TCGA-SW-A7EA-01 | -326.29       | 296.78       | -29.50         |
| 60  | TCGA-D7-8576-01 | -136.15       | 173.40       | 37.25          |
| 61  | TCGA-VQ-A8E2-01 | 216.64        | -371.25      | -154.61        |
| 62  | TCGA-FP-7735-01 | -169.70       | 734.22       | 564.52         |
| 63  | TCGA-BR-8060-01 | 810.20        | 672.91       | 1483.11        |
| 64  | TCGA-BR-6566-01 | 509.75        | 1165.88      | 1675.63        |
| 65  | TCGA-D7-A4YT-01 | -679.77       | -567.28      | -1247.05       |
| 66  | TCGA-FP-8209-01 | 1676.52       | 2014.94      | 3691.46        |
| 67  | TCGA-HU-8243-01 | -637.05       | -360.38      | -997.44        |
| 68  | TCGA-HU-8249-01 | -805.15       | 264.65       | -540.50        |
| 69  | TCGA-VQ-A8DV-01 | -1339.78      | -1043.68     | -2383.45       |
| 70  | TCGA-BR-6454-01 | -148.48       | 1475.74      | 1327.26        |
| 71  | TCGA-CD-A4MG-01 | 308.66        | 604.31       | 912.98         |
| 72  | TCGA-HU-A4GU-01 | -929.31       | -297.23      | -1226.55       |
| 73  | TCGA-VQ-A94R-01 | 508.11        | 293.67       | 801.78         |
| 74  | TCGA-BR-8589-01 | -694.29       | 1709.75      | 1015.46        |
| 75  | TCGA-D7-A4YV-01 | 364.29        | 1216.88      | 1581.17        |
| 76  | TCGA-VQ-A91A-01 | 1118.53       | 567.30       | 1685.82        |
| 77  | TCGA-HU-A4GP-01 | -682.48       | -138.95      | -821.43        |
| 78  | TCGA-D7-6815-01 | -10.55        | -77.16       | -87.71         |
| 79  | TCGA-VQ-A92D-01 | -690.29       | -753.39      | -1443.68       |
| 80  | TCGA-BR-8677-01 | 1072.90       | 1118.04      | 2190.94        |
| 81  | TCGA-BR-7703-01 | -879.57       | 333.31       | -546.26        |
| 82  | TCGA-CG-4304-01 | 700.63        | 1099.29      | 1799.92        |
| 83  | TCGA-HU-A4G3-01 | -650.70       | -146.44      | -797.13        |
| 84  | TCGA-HU-A4HB-01 | -328.54       | 2005.36      | 1676.82        |
| 85  | TCGA-BR-6707-01 | -12.01        | 1391.93      | 1379.91        |
| 86  | TCGA-VQ-A8DZ-01 | -624.87       | -178.37      | -803.24        |
| 87  | TCGA-BR-A4QL-01 | -983.80       | 26.01        | -957.78        |
| 88  | TCGA-CD-A48C-01 | 72.99         | 191.49       | 264.48         |
| 89  | TCGA-BR-7722-01 | -44.35        | 429.60       | 385.25         |
| 90  | TCGA-CD-5803-01 | 1590.27       | 2238.05      | 3828.32        |
| 91  | TCGA-CD-5813-01 | 1795.77       | 1958.23      | 3754.00        |
| 92  | TCGA-BR-7715-01 | 202.71        | -533.40      | -330.69        |
| 93  | TCGA-BR-A453-01 | 1419.12       | 522.85       | 1941.97        |
| 94  | TCGA-CG-4442-01 | -381.92       | -154.29      | -536.21        |
| 95  | TCGA-D7-A6F2-01 | -73.64        | 799.16       | 725.52         |
| 96  | TCGA-R5-A7ZE-01 | -1482.38      | -871.12      | -2353.50       |
| 97  | TCGA-CG-4477-01 | 348.14        | 1566.67      | 1914.81        |
| 98  | TCGA-HU-A4GD-01 | -1692.88      | -723.45      | -2416.33       |
| 99  | TCGA-VQ-A923-01 | -37.37        | 1714.50      | 1677.13        |
| 100 | TCGA-KB-A93G-01 | 1632.26       | 1038.85      | 2671.11        |

|     | ID              | Stromal_score | Immune_score | ESTIMATE_score |
|-----|-----------------|---------------|--------------|----------------|
| 1   | TCGA-VQ-A8P2-01 | -1308.98      | -776.42      | -2085.40       |
| 2   | TCGA-VQ-A8PC-01 | 124.65        | 960.99       | 1085.63        |
| 3   | TCGA-BR-8284-01 | 909.19        | 1516.58      | 2425.76        |
| 4   | TCGA-VQ-A8P3-01 | -163.15       | -43.09       | -206.23        |
| 5   | TCGA-CD-8534-01 | -93.98        | 427.04       | 333.06         |
| 6   | TCGA-BR-8682-01 | 870.13        | 600.63       | 1470.76        |
| 7   | TCGA-RD-A8N2-01 | 971.71        | 544.85       | 1516.56        |
| 8   | TCGA-HU-A4H2-01 | -682.65       | 310.76       | -371.89        |
| 9   | TCGA-BR-A4IY-01 | 961.13        | 1140.00      | 2101.13        |
| 10  | TCGA-CD-8531-01 | 251.40        | 2039.54      | 2290.94        |
| 11  | TCGA-BR-6456-01 | 1078.36       | 682.77       | 1761.13        |
| 12  | TCGA-HU-8238-01 | -267.09       | 581.52       | 314.43         |
| 13  | TCGA-BR-8365-01 | 1356.11       | 793.37       | 2149.48        |
| 14  | TCGA-IN-8462-01 | -20.83        | 239.84       | 219.02         |
| 15  | TCGA-BR-8367-01 | 814.64        | 213.41       | 1028.05        |
| 16  | TCGA-BR-8679-01 | 205.15        | -332.51      | -127.36        |
| 17  | TCGA-HF-7133-01 | 158.05        | 1078.55      | 1236.61        |
| 18  | TCGA-FP-A8CX-01 | -895.82       | 288.33       | -607.49        |
| 19  | TCGA-HU-A4H3-01 | -766.48       | -16.15       | -782.63        |
| 20  | TCGA-VQ-A91W-01 | -735.06       | 833.52       | 98.46          |
| 21  | TCGA-D7-A6EX-01 | -702.78       | -814.41      | -1517.19       |
| 22  | TCGA-BR-7851-01 | 252.39        | 433.80       | 686.19         |
| 23  | TCGA-BR-A4J2-01 | 1249.58       | 1506.79      | 2756.37        |
| 24  | TCGA-B7-5816-01 | 1388.12       | 1409.47      | 2797.59        |
| 25  | TCGA-HF-7131-01 | -350.24       | 642.34       | 292.10         |
| 26  | TCGA-F1-6875-01 | -1024.92      | -1024.20     | -2049.12       |
| 27  | TCGA-IN-AB1X-01 | -769.73       | 1034.82      | 265.09         |
| 28  | TCGA-BR-8686-01 | 693.98        | 1530.31      | 2224.29        |
| 29  | TCGA-HF-7132-01 | 280.19        | 1374.35      | 1654.53        |
| 30  | TCGA-BR-8369-01 | 25.65         | -331.49      | -305.84        |
| 31  | TCGA-FP-A4BE-01 | -256.39       | 1182.10      | 925.71         |
| 32  | TCGA-CG-4306-01 | 351.55        | 874.20       | 1225.76        |
| 33  | TCGA-HU-A4GY-01 | 1690.03       | 2639.91      | 4329.94        |
| 34  | TCGA-IP-7968-01 | 358.85        | 380.39       | 739.24         |
| 35  | TCGA-BR-4357-01 | 573.62        | 1478.24      | 2051.85        |
| 36  | TCGA-IN-A7NU-01 | 28.42         | 814.17       | 842.58         |
| 37  | TCGA-BR-4370-01 | 1214.64       | 1267.19      | 2481.83        |
| 38  | TCGA-VQ-A925-01 | -979.12       | -329.95      | -1309.07       |
| 39  | TCGA-RD-A8N6-01 | -213.32       | -412.93      | -626.25        |
| 40  | TCGA-VQ-AA6A-01 | -1171.28      | -476.94      | -1648.22       |
| 41  | TCGA-BR-4371-01 | -943.27       | 235.04       | -708.22        |
| 42  | TCGA-VQ-AA6B-01 | -845.57       | -807.02      | -1652.59       |
| 43  | TCGA-VQ-A8PH-01 | -1311.44      | -64.94       | -1376.37       |
| 44  | TCGA-VQ-A8E0-01 | -1029.14      | 243.61       | -785.53        |
| 45  | TCGA-BR-8058-01 | 1278.35       | 1878.15      | 3156.50        |
| 46  | TCGA-BR-8371-01 | 528.56        | 899.06       | 1427.62        |
| 47  | TCGA-B7-A5TJ-01 | -607.21       | -306.28      | -913.49        |
| 48  | TCGA-IN-8663-01 | -902.61       | -480.63      | -1383.24       |
| 49  | TCGA-VQ-AA6K-01 | -244.98       | 212.42       | -32.56         |
| 50  | TCGA-FP-8099-01 | -67.07        | 198.42       | 131.35         |
| 51  | TCGA-RD-A7C1-01 | -8.98         | 1398.23      | 1389.25        |
| 52  | TCGA-BR-4253-01 | 409.37        | 2494.30      | 2903.67        |
| 53  | TCGA-CG-5716-01 | -685.45       | 997.74       | 312.29         |
| 54  | TCGA-D7-A4YX-01 | -546.54       | 854.39       | 307.86         |
| 55  | TCGA-MX-A5UG-01 | 1500.55       | 1777.14      | 3277.69        |
| 56  | TCGA-VQ-A8PO-01 | -155.62       | 1049.10      | 893.48         |
| 57  | TCGA-BR-8291-01 | 1693.88       | 1298.16      | 2992.04        |
| 58  | TCGA-D7-A4YU-01 | 445.43        | 1611.66      | 2057.09        |
| 59  | TCGA-VQ-A8PK-01 | -437.84       | -72.90       | -510.74        |
| 60  | TCGA-IN-A6RI-01 | -1591.93      | -481.57      | -2073.50       |
| 61  | TCGA-BR-6706-01 | 1203.26       | 2011.70      | 3214.96        |
| 62  | TCGA-VQ-A91U-01 | -541.96       | 661.32       | 119.36         |
| 63  | TCGA-BR-4366-01 | -72.23        | 170.60       | 98.37          |
| 64  | TCGA-D7-8579-01 | 995.41        | 832.87       | 1828.28        |
| 65  | TCGA-VQ-A8PB-01 | -379.61       | -194.47      | -574.08        |
| 66  | TCGA-D7-A748-01 | 1772.94       | 1873.30      | 3646.24        |
| 67  | TCGA-HU-A4HD-01 | -416.98       | -387.60      | -804.58        |
| 68  | TCGA-CG-4437-01 | 420.00        | 1316.50      | 1736.50        |
| 69  | TCGA-BR-4367-01 | 1091.84       | 1380.01      | 2471.85        |
| 70  | TCGA-HU-A4G6-01 | -1642.40      | -499.09      | -2141.49       |
| 71  | TCGA-VQ-AA6G-01 | -942.95       | -211.90      | -1154.85       |
| 72  | TCGA-BR-8081-01 | 937.58        | 1812.79      | 2750.37        |
| 73  | TCGA-BR-8380-01 | 925.69        | 94.23        | 1019.92        |
| 74  | TCGA-VQ-A928-01 | 207.01        | -202.88      | 4.13           |
| 75  | TCGA-CG-4444-01 | 344.91        | 818.44       | 1163.35        |
| 76  | TCGA-BR-6455-01 | 111.51        | 929.45       | 1040.96        |
| 77  | TCGA-BR-8286-01 | 116.33        | 375.34       | 491.67         |
| 78  | TCGA-BR-6852-01 | 627.39        | 1969.87      | 2597.25        |
| 79  | TCGA-HU-A4GJ-01 | 206.33        | 2826.73      | 3033.07        |
| 80  | TCGA-KB-A6F7-01 | -870.15       | 885.83       | 15.68          |
| 81  | TCGA-BR-7716-01 | 161.52        | 1371.45      | 1532.97        |
| 82  | TCGA-CG-4472-01 | 1139.18       | 1354.19      | 2493.37        |
| 83  | TCGA-BR-8680-01 | -1221.67      | -1184.83     | -2406.49       |
| 84  | TCGA-VQ-A94U-01 | 226.56        | -398.46      | -171.90        |
| 85  | TCGA-VQ-A8PQ-01 | 809.74        | 2520.08      | 3329.82        |
| 86  | TCGA-D7-A6F0-01 | -619.00       | 245.08       | -373.92        |
| 87  | TCGA-FP-8631-01 | -215.86       | -390.21      | -606.07        |
| 88  | TCGA-RD-A8MV-01 | 3.90          | 1840.36      | 1844.26        |
| 89  | TCGA-D7-6822-01 | -534.14       | -153.73      | -687.86        |
| 90  | TCGA-HU-A4GT-01 | -873.20       | -8.34        | -881.54        |
| 91  | TCGA-HU-A4H4-01 | -383.12       | 1135.91      | 752.79         |
| 92  | TCGA-CD-8528-01 | -104.10       | 29.81        | -74.29         |
| 93  | TCGA-BR-A4PE-01 | 6.25          | 873.28       | 879.54         |
| 94  | TCGA-BR-A4CR-01 | -1056.28      | -1182.70     | -2238.98       |
| 95  | TCGA-IN-A7NR-01 | -556.35       | 548.71       | -7.65          |
| 96  | TCGA-BR-8366-01 | 1077.74       | 2134.92      | 3212.66        |
| 97  | TCGA-BR-8676-01 | -766.66       | 1039.38      | 272.72         |
| 98  | TCGA-CG-5724-01 | -62.08        | 533.85       | 471.77         |
| 99  | TCGA-CD-8524-01 | 471.35        | 461.36       | 932.71         |
| 100 | TCGA-D7-8574-01 | 1544.35       | 2335.58      | 3879.93        |

|    | ID              | Stromal_score | Immune_score | ESTIMATE_score |
|----|-----------------|---------------|--------------|----------------|
| 1  | TCGA-IN-A6RN-01 | -1136.54      | -286.57      | -1423.11       |
| 2  | TCGA-MX-A663-01 | 1006.36       | -146.67      | 859.69         |
| 3  | TCGA-BR-A4QI-01 | -533.80       | 98.75        | -435.05        |
| 4  | TCGA-BR-7957-01 | 1323.58       | 187.30       | 1510.88        |
| 5  | TCGA-HU-A4H5-01 | -957.75       | -37.39       | -995.14        |
| 6  | TCGA-D7-A4Z0-01 | 442.38        | 1068.63      | 1511.00        |
| 7  | TCGA-BR-8690-01 | 423.53        | 1396.69      | 1820.22        |
| 8  | TCGA-D7-A4YY-01 | 397.18        | 790.12       | 1187.31        |
| 9  | TCGA-B7-A5TI-01 | 326.09        | 130.14       | 456.23         |
| 10 | TCGA-D7-6527-01 | -281.06       | 94.33        | -186.73        |
| 11 | TCGA-CD-8536-01 | 210.21        | 501.14       | 711.36         |
| 12 | TCGA-VQ-AA6J-01 | -66.87        | 1245.47      | 1178.60        |
| 13 | TCGA-3M-AB46-01 | -432.99       | -350.21      | -783.20        |
| 14 | TCGA-VQ-AA69-01 | -1148.41      | 140.99       | -1007.41       |
| 15 | TCGA-BR-8078-01 | 459.92        | 1294.43      | 1754.35        |





| Input Sample | $\beta$ cells Naïve | $\beta$ cells Bnaive | Plasma cells | T cells CD4 | T cells CD4 naïve | T cells CD4 memory resting | T cells CD4 memory activated | T cells follicular helper | T cells regulatory (Treg) | T cells gamma delta | NK cells resting | NK cells activated | Monocytes  | Macrophages M0 | Macrophages M1 | Macrophages M2 | Dendritic cells resting | Dendritic cells activated | T mast cells resting | Mast cells activated | Eosinophils | Neutrophils | P-value     | Pearson Correlation | RMSSE    |
|--------------|---------------------|----------------------|--------------|-------------|-------------------|----------------------------|------------------------------|---------------------------|---------------------------|---------------------|------------------|--------------------|------------|----------------|----------------|----------------|-------------------------|---------------------------|----------------------|----------------------|-------------|-------------|-------------|---------------------|----------|
| TCGA-BR-759  | 0.00000000          | 0.00000000           | 0.01349055   | 0.0613038   | 0                 | 0.20373860                 | 0.00000000                   | 0.07387292                | 0.00000000                | 0.02342100          | 0.00000000       | 0.00000000         | 0.04794158 | 0.00000000     | 0.05771202     | 0.01642678     | 0.00000000              | 0.01141013                | 0.12360105           | 0.02222800           | 0.00000000  | 0.02224951  | 0.03        | 0.19972198          | 1.005549 |
| TCGA-BR-A417 | 0.00578208          | 0.00000000           | 0.01965399   | 0.23362570  | 0                 | 0.07598142                 | 0.01742029                   | 0.06323109                | 0.05854823                | 0.00000000          | 0.07960540       | 0.02182548         | 0.08423538 | 0.12639023     | 0.30201451     | 0.00000000     | 0.00000000              | 0.00000000                | 0.00000000           | 0.01167650           | 0.00000000  | 0.00000000  | 0.05        | 0.14709298          | 1.040556 |
| TCGA-BR-A4U1 | 0.01725921          | 0.02591618           | 0.00325479   | 0.13406895  | 0                 | 0.12281088                 | 0.00000000                   | 0.06363195                | 0.05264691                | 0.00000000          | 0.06050251       | 0.02126325         | 0.08397819 | 0.09591694     | 0.22053376     | 0.007199252    | 0.00000000              | 0.00000000                | 0.00096953           | 0.04044679           | 0.00000000  | 0.00000000  | 0.01        | 0.22300841          | 0.999847 |
| TCGA-BR-A4J9 | 0.07759331          | 0.09440084           | 0.00000000   | 0.05432633  | 0                 | 0.19952548                 | 0.00000000                   | 0.04990764                | 0.05791999                | 0.00000000          | 0.15392781       | 0.07511513         | 0.11733044 | 0.00000000     | 0.00000000     | 0.00000000     | 0.00000000              | 0.00000000                | 0.01532935           | 0.01102612           | 0.00000000  | 0.00000000  | 0.01        | 0.12102612          | 1.050443 |
| TCGA-CD-A4MH | 0.01725921          | 0.02591618           | 0.00325479   | 0.13406895  | 0                 | 0.12281088                 | 0.00000000                   | 0.06363195                | 0.05264691                | 0.00000000          | 0.06050251       | 0.02126325         | 0.08397819 | 0.09591694     | 0.22053376     | 0.007199252    | 0.00000000              | 0.00000000                | 0.00096953           | 0.04044679           | 0.00000000  | 0.00000000  | 0.01        | 0.22300841          | 0.999847 |
| TCGA-AD-A7D0 | 0.03794519          | 0.02719156           | 0.00000000   | 0.02719157  | 0                 | 0.27060629                 | 0.00000000                   | 0.01135857                | 0.03221782                | 0.00000000          | 0.06962554       | 0.01634501         | 0.03119297 | 0.00829487     | 0.12069092     | 0.032690165    | 0.05432370              | 0.14918476                | 0.00000000           | 0.00000000           | 0.00000000  | 0.17        | 0.08526751  | 1.045835            |          |
| TCGA-BR-A4Y1 | 0.03939708          | 0.00000000           | 0.02724324   | 0.10742688  | 0                 | 0.04367774                 | 0.07797913                   | 0.05913558                | 0.03493716                | 0.00000000          | 0.05557602       | 0.00000000         | 0.03212820 | 0.21234337     | 0.23974328     | 0.01054478     | 0.01915344              | 0.00000000                | 0.04010585           | 0.00000000           | 0.00000000  | 0.01        | 0.28318639  | 0.9853278           |          |
| TCGA-BR-A4J6 | 0.00000000          | 0.00974036           | 0.04737594   | 0.11817360  | 0                 | 0.18536858                 | 0.00000000                   | 0.09393995                | 0.05144151                | 0.01178877          | 0.00000000       | 0.05821865         | 0.09371830 | 0.13496257     | 0.00000000     | 0.00000000     | 0.02196380              | 0.09875616                | 0.04051240           | 0.00000000           | 0.00000000  | 0.19        | 0.08696929  | 1.055509            |          |
| TCGA-BR-A4I4 | 0.01725921          | 0.02591618           | 0.00325479   | 0.13406895  | 0                 | 0.12281088                 | 0.00000000                   | 0.06363195                | 0.05264691                | 0.00000000          | 0.06050251       | 0.02126325         | 0.08397819 | 0.09591694     | 0.22053376     | 0.007199252    | 0.00000000              | 0.00096953                | 0.04044679           | 0.00000000           | 0.00000000  | 0.01        | 0.22300841  | 0.999847            |          |
| TCGA-CD-A4M1 | 0.001617407         | 0.00000000           | 0.00000000   | 0.01291014  | 0                 | 0.20611271                 | 0.00000000                   | 0.06575115                | 0.05264691                | 0.00000000          | 0.06968251       | 0.05003544         | 0.00000000 | 0.17688320     | 0.109497316    | 0.07211580     | 0.00000000              | 0.00000000                | 0.18524813           | 0.00000000           | 0.00000000  | 0.01        | 0.023134562 | 0.91                |          |
| TCGA-BR-A4J2 | 0.26374282          | 0.08202392           | 0.00000000   | 0.07821504  | 0                 | 0.12576508                 | 0.00000000                   | 0.02977594                | 0.05468314                | 0.00000000          | 0.01455415       | 0.02745121         | 0.04880037 | 0.01556891     | 0.08787102     | 0.00000000     | 0.00000000              | 0.00000000                | 0.01403577           | 0.03689301           | 0.00000000  | 0.00000000  | 0.01        | 0.04035777          | 0.988901 |
| TCGA-CD-A4AG | 0.04682366          | 0.00000000           | 0.00000000   | 0.03889481  | 0                 | 0.20127277                 | 0.00000000                   | 0.05988425                | 0.02335254                | 0.00000000          | 0.06645738       | 0.01511423         | 0.12916424 | 0.04862181     | 0.16263818     | 0.04415134     | 0.00000000              | 0.00000000                | 0.00000000           | 0.12186433           | 0.00000000  | 0.00000000  | 0.02        | 0.20541307          | 1.006379 |
| TCGA-BR-A4J8 | 0.04666470          | 0.07603116           | 0.00947151   | 0.06563034  | 0                 | 0.19074178                 | 0.00000000                   | 0.00488251                | 0.10304790                | 0.01923589          | 0.07699931       | 0.02258358         | 0.12286022 | 0.00000000     | 0.00000000     | 0.00000000     | 0.00000000              | 0.00000000                | 0.17658796           | 0.00000000           | 0.00000000  | 0.05        | 0.15050084  | 1.0248428           |          |
| TCGA-BR-A4Y1 | 0.01725921          | 0.02591618           | 0.00325479   | 0.13406895  | 0                 | 0.12281088                 | 0.00000000                   | 0.06363195                | 0.05264691                | 0.00000000          | 0.06050251       | 0.02126325         | 0.08397819 | 0.09591694     | 0.22053376     | 0.007199252    | 0.00000000              | 0.00000000                | 0.00096953           | 0.04044679           | 0.00000000  | 0.00000000  | 0.01        | 0.22300841          | 0.999847 |
| TCGA-CD-A4A8 | 0.01957087          | 0.00000000           | 0.00000000   | 0.01766023  | 0                 | 0.05081598                 | 0.00000000                   | 0.06710662                | 0.02390721                | 0.04811653          | 0.00000000       | 0.08114871         | 0.00000000 | 0.09020356     | 0.116477817    | 0.25903305     | 0.00000000              | 0.00000000                | 0.00000000           | 0.00000000           | 0.00000000  | 0.01        | 0.00000000  | 0.8605160           |          |
| TCGA-BR-A4I1 | 0.00100000          | 0.00000000           | 0.02969058   | 0.12503948  | 0                 | 0.09426738                 | 0.00000000                   | 0.04161475                | 0.17976003                | 0.00000000          | 0.09467492       | 0.01246581         | 0.10456901 | 0.00000000     | 0.01161944     | 0.00000000     | 0.00000000              | 0.00000000                | 0.14787392           | 0.00000000           | 0.00000000  | 0.02        | 0.04844165  | 1.0913880           |          |
| TCGA-BR-A4J5 | 0.00000000          | 0.00674224           | 0.00000000   | 0.04186479  | 0                 | 0.16831559                 | 0.00000000                   | 0.01462238                | 0.04822440                | 0.00000000          | 0.02706844       | 0.00000000         | 0.3691524  | 0.03496207     | 0.2126628      | 0.00000000     | 0.00000000              | 0.00000000                | 0.04373521           | 0.00000000           | 0.00000000  | 0.01        | 0.26530071  | 0.997268            |          |
| TCGA-BR-A4J2 | 0.04296745          | 0.00298960           | 0.00000000   | 0.00000000  | 0                 | 0.19194877                 | 0.00000000                   | 0.00631186                | 0.03623011                | 0.02817297          | 0.00391618       | 0.01073569         | 0.01024237 | 0.047191201    | 0.0842545      | 0.00000000     | 0.00000000              | 0.00000000                | 0.13218154           | 0.00000000           | 0.00000000  | 0.01        | 0.27754232  | 0.97669             |          |









































|      | gene      | feature       | p.value      | estimate   | adj.p.value  | COR.ID | gene         | feature       | p.value      | estimate   | adj.p.value  | COR.ID |
|------|-----------|---------------|--------------|------------|--------------|--------|--------------|---------------|--------------|------------|--------------|--------|
| 2401 | CEP85     | Stromal_score | 1.109502e-10 | -0.4199476 | 2.944507e-06 | NEG    | KRT8P41      | Stromal_score | 2.125912e-07 | -0.3433985 | 5.641693e-03 | NEG    |
| 2402 | STK10     | Stromal_score | 1.835758e-11 | 0.4356165  | 4.871919e-07 | POS    | PURG         | Stromal_score | 3.157162e-10 | 0.4104543  | 8.378791e-06 | POS    |
| 2403 | FKBP7     | Stromal_score | 1.602235e-17 | 0.5357778  | 4.252118e-13 | POS    | SULT6B1      | Stromal_score | 1.277998e-08 | -0.3742306 | 3.391413e-04 | NEG    |
| 2404 | FAM70A    | Stromal_score | 2.901560e-11 | 0.4317050  | 7.700450e-07 | POS    | SLC24A4      | Stromal_score | 4.165921e-09 | 0.3856727  | 1.105594e-04 | POS    |
| 2405 | TIGD5     | Stromal_score | 1.376277e-08 | -0.3734577 | 3.652501e-04 | NEG    | GALR1        | Stromal_score | 1.041670e-07 | 0.3515364  | 2.764512e-03 | POS    |
| 2406 | C14orf159 | Stromal_score | 1.397873e-06 | 0.3207211  | 3.709915e-02 | POS    | DBX2         | Stromal_score | 3.838457e-09 | 0.3864914  | 1.018889e-04 | POS    |
| 2407 | RIMKB     | Stromal_score | 6.264942e-07 | 0.3300084  | 1.662653e-02 | POS    | BCD4350      | Stromal_score | 4.145545e-07 | 0.3355632  | 1.100186e-02 | POS    |
| 2408 | C1orf31   | Stromal_score | 1.318669e-06 | -0.3214516 | 3.499616e-02 | NEG    | ORSK2        | Stromal_score | 2.005465e-07 | 0.3440720  | 5.322304e-03 | POS    |
| 2409 | ARL6P5    | Stromal_score | 1.542867e-13 | 0.4737222  | 4.094615e-09 | POS    | LOC643542    | Stromal_score | 3.807317e-07 | 0.3365738  | 1.010424e-02 | POS    |
| 2410 | BYSL      | Stromal_score | 4.304489e-11 | -0.4282944 | 1.142369e-06 | NEG    | BC033330     | Stromal_score | 1.780158e-07 | -0.3454446 | 4.724362e-03 | NEG    |
| 2411 | RUNX1T1   | Stromal_score | 6.096475e-28 | 0.6547059  | 1.615290e-23 | POS    | IMP2         | Stromal_score | 7.317803e-09 | 0.3790768  | 1.942073e-04 | POS    |
| 2412 | ZWILCH    | Stromal_score | 6.923645e-10 | -0.4031249 | 1.837466e-05 | NEG    | ANKRD30BP2   | Stromal_score | 7.934235e-07 | -0.3277344 | 2.105667e-02 | NEG    |
| 2413 | PTGR      | Stromal_score | 2.396229e-23 | 0.6082471  | 6.393352e-19 | POS    | TXNDC2       | Stromal_score | 4.029329e-08 | 0.3620296  | 1.069343e-03 | POS    |
| 2414 | HOCK3     | Stromal_score | 5.029577e-11 | 0.4269376  | 1.334799e-06 | POS    | OLFMD3       | Stromal_score | 5.633151e-07 | 0.3318922  | 1.494982e-02 | POS    |
| 2415 | BC019904  | Stromal_score | 2.732772e-07 | 0.3404579  | 7.264447e-03 | POS    | BLID         | Stromal_score | 2.276903e-09 | 0.3916624  | 6.042406e-05 | POS    |
| 2416 | MIR937    | Stromal_score | 2.628174e-07 | -0.3400331 | 6.974910e-03 | NEG    | LOC645434    | Stromal_score | 6.310232e-08 | 0.3571206  | 1.674673e-03 | POS    |
| 2417 | KIAA0895  | Stromal_score | 2.320301e-15 | -0.5039689 | 6.173769e-11 | NEG    | KIF4B        | Stromal_score | 4.641190e-09 | -0.3845888 | 1.231725e-04 | NEG    |
| 2418 | TNFSF14   | Stromal_score | 6.102871e-07 | 0.3300237  | 1.619877e-02 | POS    | MCF2         | Stromal_score | 4.087749e-07 | 0.3357302  | 1.084849e-02 | POS    |
| 2419 | SNORD22   | Stromal_score | 1.316257e-07 | -0.3488928 | 3.493214e-03 | NEG    | AKO55854     | Stromal_score | 1.596786e-06 | 0.3192969  | 4.158093e-02 | POS    |
| 2420 | MILR1     | Stromal_score | 2.301973e-09 | 0.3919545  | 6.109207e-05 | POS    | EXD1         | Stromal_score | 1.341832e-06 | -0.3212338 | 3.581089e-02 | NEG    |
| 2421 | TMEM41A   | Stromal_score | 8.819783e-09 | -0.3780650 | 2.340882e-04 | NEG    | BC038746     | Stromal_score | 6.473524e-07 | 0.3302117  | 1.718009e-02 | POS    |
| 2422 | TNK1      | Stromal_score | 2.743965e-12 | -0.4513423 | 7.282209e-08 | NEG    | AKO24141     | Stromal_score | 6.387079e-09 | 0.3813622  | 1.695067e-04 | POS    |
| 2423 | C3orf52   | Stromal_score | 8.098503e-10 | -0.4016404 | 2.140262e-05 | NEG    | TTY10        | Stromal_score | 1.452462e-08 | 0.3728949  | 3.854689e-04 | POS    |
| 2424 | NTN1      | Stromal_score | 1.057124e-10 | 0.4203795  | 2.935501e-06 | POS    | CTAGE1       | Stromal_score | 8.714336e-07 | -0.3265651 | 2.312698e-02 | NEG    |
| 2425 | RBL1      | Stromal_score | 1.731359e-10 | -0.4159442 | 4.594853e-06 | NEG    | AK127472     | Stromal_score | 1.539552e-08 | 0.3722955  | 4.085916e-04 | POS    |
| 2426 | SEC23A    | Stromal_score | 7.051184e-15 | 0.4960316  | 1.871314e-10 | POS    | BC046219     | Stromal_score | 3.475416e-07 | 0.3376528  | 9.223407e-03 | POS    |
| 2427 | UNG       | Stromal_score | 8.993615e-07 | -0.3261975 | 2.386816e-02 | NEG    | LOC254312    | Stromal_score | 1.856168e-08 | 0.3703195  | 4.926083e-04 | POS    |
| 2428 | HLX       | Stromal_score | 1.625891e-15 | 0.5060959  | 4.314952e-11 | POS    | GPR26        | Stromal_score | 9.191864e-08 | 0.3529402  | 2.439429e-03 | POS    |
| 2429 | TMEM59L   | Stromal_score | 1.397570e-11 | 0.4379232  | 3.709011e-07 | POS    | P2P          | Stromal_score | 1.986430e-11 | 0.4349461  | 5.271787e-07 | POS    |
| 2430 | CCDC50    | Stromal_score | 1.165828e-14 | 0.4925049  | 3.093991e-10 | POS    | GRM6         | Stromal_score | 2.943553e-07 | 0.3400122  | 5.546506e-03 | POS    |
| 2431 | HM13      | Stromal_score | 1.358866e-06 | -0.3210758 | 3.606294e-02 | NEG    | LOC100132987 | Stromal_score | 6.469962e-10 | 0.4037860  | 1.716798e-05 | POS    |
| 2432 | AKO55386  | Stromal_score | 7.533107e-11 | 0.4233985  | 1.999211e-06 | POS    | BC038181     | Stromal_score | 5.962200e-11 | 0.4254482  | 1.582309e-06 | POS    |
| 2433 | HCFC1R1   | Stromal_score | 2.772489e-10 | 0.4116501  | 7.357909e-06 | POS    | FAM48B1      | Stromal_score | 5.642314e-08 | 0.3583525  | 1.497414e-03 | POS    |
| 2434 | DC1P1     | Stromal_score | 2.358644e-07 | -0.3421932 | 6.259606e-03 | NEG    | FLJ34690     | Stromal_score | 5.211098e-07 | 0.3328291  | 1.362973e-02 | POS    |
| 2435 | RPL8      | Stromal_score | 6.048345e-10 | -0.4043992 | 1.605170e-05 | NEG    | AX746487     | Stromal_score | 8.357648e-07 | 0.3270979  | 2.218036e-02 | POS    |
| 2436 | SUN420K2  | Stromal_score | 2.679699e-07 | -0.3407052 | 7.112342e-03 | NEG    | SNORD112     | Stromal_score | 1.184062e-06 | 0.3227951  | 3.142382e-02 | POS    |
| 2437 | CCDC58    | Stromal_score | 6.69215e-09  | -0.3908983 | 1.774189e-04 | NEG    | PCDH11Y      | Stromal_score | 1.809609e-06 | 0.3174712  | 4.800090e-02 | POS    |
| 2438 | AFMD      | Stromal_score | 2.269774e-11 | -0.4338095 | 6.023754e-07 | NEG    | DKF2P434H108 | Stromal_score | 1.136240e-08 | 0.3754509  | 3.015468e-04 | POS    |
| 2439 | BIO       | Stromal_score | 1.958463e-08 | -0.3697531 | 5.197564e-04 | NEG    | LOC100507584 | Stromal_score | 1.865162e-06 | 0.3170808  | 4.940953e-02 | POS    |
| 2440 | ZNF362    | Stromal_score | 1.050683e-13 | 0.4765878  | 2.789205e-09 | POS    | MIR764       | Stromal_score | 1.783599e-06 | 0.3176484  | 4.733483e-02 | POS    |
| 2441 | FAM160A1  | Stromal_score | 4.490827e-09 | -0.3849197 | 1.191821e-04 | NEG    | MIR4272      | Stromal_score | 1.935149e-06 | 0.3195439  | 4.074133e-02 | POS    |
| 2442 | ADCY2     | Stromal_score | 1.662490e-08 | 0.3714795  | 4.412081e-04 | POS    | MIR3119-1    | Stromal_score | 1.942596e-06 | -0.3243745 | 2.766919e-02 | NEG    |
| 2443 | C14orf80  | Stromal_score | 7.112867e-10 | -0.4028701 | 1.887684e-05 | NEG    | MIR3119-2    | Stromal_score | 1.042596e-06 | -0.3243745 | 2.766919e-02 | NEG    |











|     | gene     | feature       | p.value       | estimate   | adj.p.value  | COR.ID | gene       | feature       | p.value      | estimate   | adj.p.value  | COR.ID |
|-----|----------|---------------|---------------|------------|--------------|--------|------------|---------------|--------------|------------|--------------|--------|
| 601 | ADAM19   | Stromal_score | 0.00000e+00   | 0.6044679  | 0.00000e+00  | POS    | BATF3      | Stromal_score | 9.096469e-07 | 0.4113647  | 2.080729e-02 | POS    |
| 602 | SCMP     | Stromal_score | 1.432891e-09  | 0.4963077  | 3.276879e-05 | POS    | MMP23B     | Stromal_score | 2.894617e-08 | 0.4601405  | 6.596831e-04 | POS    |
| 603 | DOCK8    | Stromal_score | 7.724057e-08  | 0.4469759  | 1.766415e-03 | POS    | SGIP1      | Stromal_score | 0.00000e+00  | 0.5919227  | 0.00000e+00  | POS    |
| 604 | TSPAN1   | Stromal_score | 6.894864e-07  | 0.4156692  | 1.576787e-02 | POS    | PIANP      | Stromal_score | 1.758552e-07 | 0.4355282  | 4.021633e-03 | POS    |
| 605 | LEF1     | Stromal_score | 2.738601e-08  | 0.4608185  | 6.262906e-04 | POS    | EIF2B5     | Stromal_score | 1.679279e-06 | -0.4018779 | 3.840342e-02 | NEG    |
| 606 | FAM107A  | Stromal_score | 2.898831e-07  | 0.4283680  | 6.629339e-03 | POS    | CLEC1A     | Stromal_score | 0.00000e+00  | 0.5566823  | 0.00000e+00  | POS    |
| 607 | CADM3    | Stromal_score | 3.564989e-07  | 0.4276071  | 6.986451e-03 | POS    | MMP16      | Stromal_score | 4.184124e-08 | 0.4552385  | 5.668673e-04 | POS    |
| 608 | DOK2     | Stromal_score | 2.837155e-10  | 0.5122573  | 6.485290e-06 | POS    | TNFRSF8    | Stromal_score | 1.768003e-06 | 0.4010682  | 4.043247e-02 | POS    |
| 609 | MFNG     | Stromal_score | 1.067635e-09  | 0.4994488  | 2.441573e-05 | POS    | ZNRF7      | Stromal_score | 6.068750e-07 | 0.4174861  | 1.387862e-02 | POS    |
| 610 | THEMIS2  | Stromal_score | 0.00000e+00   | 0.5596723  | 0.00000e+00  | POS    | RASGRP4    | Stromal_score | 3.405378e-07 | 0.4260267  | 7.787759e-03 | POS    |
| 611 | FOXP3    | Stromal_score | 1.678757e-06  | 0.4018827  | 3.839150e-02 | POS    | MSC-AS1    | Stromal_score | 0.00000e+00  | 0.6645010  | 0.00000e+00  | POS    |
| 612 | DOCK2    | Stromal_score | 8.970288e-09  | 0.4749781  | 2.051415e-04 | POS    | NR2F1-AS1  | Stromal_score | 7.020138e-10 | 0.5037557  | 1.605435e-05 | POS    |
| 613 | ROBO1    | Stromal_score | 1.836437e-07  | 0.4349137  | 4.199747e-03 | POS    | HTR2A      | Stromal_score | 1.933195e-09 | 0.4930202  | 4.421023e-05 | POS    |
| 614 | CMTM8    | Stromal_score | 5.319739e-08  | -0.4502091 | 1.216571e-03 | NEG    | ZNRF7      | Stromal_score | 6.08664e-07  | -0.4174422 | 1.391936e-02 | NEG    |
| 615 | IL8ST    | Stromal_score | 0.00000e+00   | 0.5343918  | 0.00000e+00  | POS    | MDGA1      | Stromal_score | 1.663046e-07 | 0.4303194  | 3.803206e-03 | POS    |
| 616 | HAVCR2   | Stromal_score | 1.804170e-10  | 0.5160082  | 4.125957e-08 | POS    | EVCI2      | Stromal_score | 4.568074e-10 | 0.5079358  | 1.044902e-05 | POS    |
| 617 | TSHZ2    | Stromal_score | 8.536763e-09  | 0.4755877  | 1.952272e-04 | POS    | TRPC9      | Stromal_score | 3.796489e-07 | 0.4244366  | 8.682191e-03 | POS    |
| 618 | ITGA7    | Stromal_score | 5.108720e-10  | 0.5068774  | 1.167856e-05 | POS    | LINC01638  | Stromal_score | 1.928180e-08 | 0.4653546  | 4.405955e-04 | POS    |
| 619 | COLEC12  | Stromal_score | 0.00000e+00   | 0.5731529  | 0.00000e+00  | POS    | TROJEN     | Stromal_score | 3.531654e-07 | 0.4254951  | 8.076546e-03 | POS    |
| 620 | ADGR4    | Stromal_score | 0.00000e+00   | 0.6096089  | 0.00000e+00  | POS    | CASS4      | Stromal_score | 7.536018e-08 | 0.4473125  | 1.723412e-03 | POS    |
| 621 | LAIR1    | Stromal_score | 0.00000e+00   | 0.5835528  | 0.00000e+00  | POS    | ZNF16      | Stromal_score | 0.471106e-07 | -0.4236075 | 9.186720e-03 | NEG    |
| 622 | GLTD     | Stromal_score | 0.00000e+00   | 0.6748805  | 0.00000e+00  | POS    | SEPTA      | Stromal_score | 0.00000e+00  | 0.5687933  | 0.00000e+00  | POS    |
| 623 | LINC0578 | Stromal_score | 1.863763e-07  | 0.4347039  | 4.262239e-03 | POS    | HSPB2      | Stromal_score | 1.703464e-10 | 0.5164569  | 3.896816e-06 | POS    |
| 624 | EVGA     | Stromal_score | 0.00000e+00   | 0.6175300  | 0.00000e+00  | POS    | SCX5       | Stromal_score | 1.796473e-07 | 0.4332258  | 4.108355e-03 | POS    |
| 625 | FBXL7    | Stromal_score | 0.00000e+00   | 0.6573066  | 0.00000e+00  | POS    | PCDHGB6    | Stromal_score | 1.206255e-06 | 0.4070335  | 2.758856e-02 | POS    |
| 626 | DOK3     | Stromal_score | 1.777337e-06  | 0.4009853  | 4.064593e-02 | POS    | PABPCAL    | Stromal_score | 1.014019e-07 | 0.4432348  | 2.318806e-03 | POS    |
| 627 | SYDE1    | Stromal_score | 0.00000e+00   | 0.6801385  | 0.00000e+00  | POS    | GLUCY1A2   | Stromal_score | 4.187080e-07 | 0.4229978  | 9.574326e-03 | POS    |
| 628 | PKNO3    | Stromal_score | 1.050107e-06  | 0.4091698  | 2.401489e-02 | POS    | MSA41      | Stromal_score | 1.163484e-07 | 0.4413277  | 2.660771e-03 | POS    |
| 629 | SIGLEC14 | Stromal_score | 3.563618e-07  | 0.4253634  | 8.148639e-03 | POS    | KCNK13     | Stromal_score | 1.707181e-08 | 0.4669105  | 3.954153e-04 | POS    |
| 630 | POE4B    | Stromal_score | 0.00000e+00   | 0.5346747  | 0.00000e+00  | POS    | GPR141     | Stromal_score | 3.543780e-08 | 0.4574383  | 8.104224e-04 | POS    |
| 631 | PK3P1    | Stromal_score | 1.303808e-07  | 0.4369337  | 2.591460e-03 | POS    | PTH1R      | Stromal_score | 3.334372e-07 | 0.4283340  | 7.623756e-03 | POS    |
| 632 | TGFB2    | Stromal_score | 1.280257e-06  | 0.4081116  | 2.827821e-02 | POS    | AP000473.1 | Stromal_score | 1.532444e-06 | 0.4033119  | 3.504547e-02 | POS    |
| 633 | MEF2C    | Stromal_score | 0.00000e+00   | 0.6583748  | 0.00000e+00  | POS    | AL157384.1 | Stromal_score | 2.006398e-07 | 0.4336601  | 4.586697e-03 | POS    |
| 634 | TNFSF12  | Stromal_score | 0.00000e+00   | 0.5896653  | 0.00000e+00  | POS    | LINC00924  | Stromal_score | 1.701310e-08 | 0.4669544  | 3.807256e-04 | POS    |
| 635 | DLC1     | Stromal_score | 2.089311e-09  | 0.4921130  | 4.795472e-05 | POS    | SPRYD4     | Stromal_score | 9.127599e-07 | -0.4113180 | 2.087391e-02 | NEG    |
| 636 | ITGAM    | Stromal_score | 4.139403e-09  | 0.4842991  | 9.466401e-05 | POS    | AL035409.1 | Stromal_score | 6.724511e-08 | 0.4488635  | 1.537629e-03 | POS    |
| 637 | EF3      | Stromal_score | 9.65368e-10   | 0.5050524  | 2.207629e-05 | POS    | CAMK4      | Stromal_score | 2.741051e-07 | 0.4291776  | 6.288511e-03 | POS    |
| 638 | PCDH18   | Stromal_score | 2.277173e-08  | 0.4632133  | 5.207866e-04 | POS    | TXLN8      | Stromal_score | 3.531748e-08 | 0.4575505  | 8.038589e-04 | POS    |
| 639 | DYSF     | Stromal_score | 1.072099e-09  | 0.4994049  | 2.451784e-05 | POS    | AC120049.1 | Stromal_score | 5.006833e-07 | 0.4203541  | 1.440131e-02 | POS    |
| 640 | MDPC1    | Stromal_score | 0.00000e+00   | 0.6407229  | 0.00000e+00  | POS    | NOVA2      | Stromal_score | 4.621203e-07 | 0.4227392  | 9.744956e-03 | POS    |
| 641 | CLEC2B   | Stromal_score | 0.00000e+00   | 0.6220710  | 0.00000e+00  | POS    | ABCA9      | Stromal_score | 5.081029e-11 | 0.5242903  | 1.061981e-06 | POS    |
| 642 | ARHGFB   | Stromal_score | 0.00000e+00   | 0.6038143  | 0.00000e+00  | POS    | NAV3       | Stromal_score | 0.00000e+00  | 0.5950255  | 0.00000e+00  | POS    |
| 643 | ARHGAP25 | Stromal_score | 2.427838e-08  | 0.4682842  | 5.552224e-04 | POS    | GIMAP5     | Stromal_score | 1.837172e-06 | 0.4004634  | 4.201429e-02 | POS    |
| 644 | LRRNCL   | Stromal_score | 1.4118609e-07 | 0.4354575  | 3.246505e-03 | POS    | AL356417.2 | Stromal_score | 2.245582e-08 | 0.4633938  | 5.135422e-04 | POS    |
| 645 | GAPT     | Stromal_score | 1.236136e-07  | 0.4404839  | 2.826919e-03 | POS    | ZNFR35     | Stromal_score | 1.719020e-07 | 0.4338502  | 3.931241e-03 | POS    |
| 646 | TCNZ     | Stromal_score | 2.780539e-07  | 0.4288801  | 6.398866e-03 | POS    | C14orf37   | Stromal_score | 4.721899e-09 | 0.4827431  | 0.079851e-04 | POS    |
| 647 | HOOK1    | Stromal_score | 8.640284e-10  | -0.5016486 | 1.975947e-05 | NEG    | INTS6      | Stromal_score | 1.700202e-06 | -0.4018828 | 3.888329e-02 | NEG    |
| 648 | BIN2     | Stromal_score | 2.935647e-08  | 0.4599112  | 6.713531e-04 | POS    | TLLI1      | Stromal_score | 6.423505e-09 | 0.4793557  | 1.468991e-04 | POS    |
| 649 | CD180    | Stromal_score | 2.517067e-08  | 0.4619159  | 5.756280e-04 | POS    | ZNFR35D    | Stromal_score | 5.156995e-07 | 0.4199151  | 1.179353e-02 | POS    |
| 650 | EVL      | Stromal_score | 1.626368e-08  | 0.4675300  | 3.718695e-04 | POS    | NUDT10     | Stromal_score | 3.639278e-07 | 0.4205051  | 8.322865e-03 | POS    |
| 651 | GLI3     | Stromal_score | 2.057300e-06  | 0.3986733  | 4.704840e-02 | POS    | TMCC2      | Stromal_score | 9.372828e-07 | 0.4109111  | 2.143472e-02 | POS    |
| 652 | ESPL1    | Stromal_score | 4.485238e-07  | -0.4219832 | 1.025729e-02 | NEG    | AL135818.1 | Stromal_score | 4.834170e-07 | 0.4215003  | 1.059788e-02 | POS    |
| 653 | CDR6     | Stromal_score | 0.00000e+00   | 0.5782753  | 0.00000e+00  | POS    | PRDM9      | Stromal_score | 0.00000e+00  | 0.5457711  | 0.00000e+00  | POS    |
| 654 | TMEM173  | Stromal_score | 2.083270e-09  | 0.4921861  | 4.764230e-05 | POS    | AC082964.1 | Stromal_score | 4.645915e-08 | 0.4538435  | 1.052474e-03 | POS    |
| 655 | RNF144B  | Stromal_score | 1.254642e-06  | 0.4063018  | 2.892109e-02 | POS    | AC106796.1 | Stromal_score | 1.578505e-07 | 0.4370549  | 3.608844e-03 | POS    |
| 656 | FGF2     | Stromal_score | 3.274637e-07  | 0.4285974  | 7.488786e-03 | POS    | AC092645.1 | Stromal_score | 5.145793e-10 | 0.5068042  | 1.176791e-05 | POS    |
| 657 | GNB4     | Stromal_score | 0.00000e+00   | 0.6739613  | 0.00000e+00  | POS    | AP005019.1 | Stromal_score | 3.323143e-09 | 0.4888847  | 7.596966e-05 | POS    |
| 658 | PKD2     | Stromal_score | 0.00000e+00   | 0.5762023  | 0.00000e+00  | POS    | RFTN2      | Stromal_score | 1.994002e-07 | 0.4337430  | 4.560082e-03 | POS    |
| 659 | RLG1     | Stromal_score | 3.792561e-10  | 0.5096673  | 8.673207e-06 | POS    | SENCR      | Stromal_score | 1.662309e-09 | 0.4946883  | 3.801534e-05 | POS    |
| 660 | CMKLR1   | Stromal_score | 0.00000e+00   | 0.5452346  | 0.00000e+00  | POS    | FBLN7      | Stromal_score | 8.611599e-09 | 0.4754804  | 1.963874e-04 | POS    |
| 661 | P2RY13   | Stromal_score | 2.323007e-09  | 0.4909619  | 5.312486e-05 | POS    | ANKDD1A    | Stromal_score | 1.325714e-08 | 0.4055702  | 3.031776e-02 | POS    |
| 662 | LAMP1    | Stromal_score | 4.510340e-10  | 0.5080578  | 1.031470e-05 | POS    | AL445426.1 | Stromal_score | 4.643346e-07 | 0.4214711  | 1.061887e-02 | POS    |
| 663 | DRAM1    | Stromal_score | 8.635540e-09  | 0.4754463  | 1.974862e-04 | POS    | ARHGAP22   | Stromal_score | 0.00000e+00  | 0.5477514  | 0.00000e+00  | POS    |
| 664 | EPHD1    | Stromal_score | 5.249146e-07  | 0.4196517  | 1.200427e-02 | POS    | SHC4       | Stromal_score | 5.798761e-08 | 0.4509682  | 1.326119e-03 | POS    |
| 665 | C1orf53  | Stromal_score | 1.648265e-06  | -0.4021705 | 3.769418e-02 | NEG    | PRPH2      | Stromal_score | 1.466442e-06 | 0.4039996  | 3.353605e-02 | POS    |
| 666 | KORR     | Stromal_score | 3.863997e-07  | 0.4241781  | 8.836575e-03 | POS    | NTNG2      | Stromal_score | 0.00000e+00  | 0.5399525  | 0.00000e+00  | POS    |
| 667 | BDH1     | Stromal_score | 9.881850e-08  | -0.4438738 | 2.214142e-03 | NEG    | TCCE3      | Stromal_score | 2.629471e-07 | -0.4297776 | 6.013327e-03 | NEG    |
| 668 | NCF1     | Stromal_score | 9.369837e-07  | 0.4109160  | 2.142789e-02 | POS    | GPR162     | Stromal_score | 3.616523e-08 | 0.4571700  | 8.270627e-04 | POS    |
| 669 | ITGA4    | Stromal_score | 1.979157e-10  | 0.5102717  | 4.528134e-06 | POS    | FGF1       | Stromal_score | 2.517969e-07 | 0.4304019  | 5.758343e-03 | POS    |
| 670 | CSF1     | Stromal_score | 1.407142e-10  | 0.5175934  | 3.355207e-06 | POS    | HNFP       | Stromal_score | 2.119546e-08 | -0.3982002 | 4.847189e-02 | NEG    |

Supporting Material 5E: M102 hub genes correlating to immune cell abundances

|    | gene       | cell type                    | estimate.rho         | p.value      | adj.p.value  | gene     | cell type                    | estimate.rho           | p.value      | adj.p.value  |
|----|------------|------------------------------|----------------------|--------------|--------------|----------|------------------------------|------------------------|--------------|--------------|
| 1  | CD8A       | T.cells.CD8                  | 0.75899282803757395  | 3.983590e-42 | 2.821975e-38 | NKG7     | T.cells.gamma.delta          | 0.41768344675271002    | 1.294624e-10 | 9.171115e-07 |
| 2  | KLRK1      | T.cells.CD8                  | 0.72465323573000295  | 8.772582e-37 | 6.214497e-33 | TCRA     | Macrophages.M1               | 0.41365537697683502    | 2.023130e-10 | 1.433185e-06 |
| 3  | GZMH       | T.cells.CD8                  | 0.70478666678532897  | 4.777558e-34 | 3.384422e-30 | TRIM22   | Macrophages.M1               | 0.411273738654925      | 2.626950e-10 | 1.860931e-06 |
| 4  | NKG7       | T.cells.CD8                  | 0.65087125767485798  | 1.184451e-27 | 8.390652e-24 | TRIM22   | T.cells.CD8                  | 0.406033563161175      | 4.633407e-10 | 3.282306e-06 |
| 5  | FASLG      | T.cells.CD8                  | 0.64025924250188104  | 1.522171e-26 | 1.078306e-22 | CD247    | Macrophages.M1               | 0.401062596254816      | 7.866259e-10 | 5.572458e-06 |
| 6  | FASLG      | Macrophages.M1               | 0.61589830548769098  | 3.718837e-24 | 2.634424e-20 | CD3E     | T.cells.CD4.memory.activated | 0.40000474318817197    | 8.794236e-10 | 6.229837e-06 |
| 7  | TBX21      | Macrophages.M1               | 0.58249601532516104  | 3.353293e-21 | 2.375473e-17 | PYHIN1   | Macrophages.M1               | 0.399606960607163      | 9.169910e-10 | 6.495964e-06 |
| 8  | SH2D1A     | T.cells.CD8                  | 0.57670170314467395  | 1.009539e-20 | 7.151571e-17 | TRIM22   | Macrophages.M0               | -0.38987798887693397   | 2.507728e-09 | 1.776475e-05 |
| 9  | GZMH       | Macrophages.M1               | 0.57570148266338395  | 1.218406e-20 | 8.631189e-17 | CD3E     | T.cells.gamma.delta          | 0.38349614631659701    | 4.767139e-09 | 3.377041e-05 |
| 10 | CD244      | T.cells.CD8                  | 0.57278567848837703  | 2.100327e-20 | 1.487871e-16 | CD3E     | Macrophages.M1               | 0.38024747714805301    | 6.576423e-09 | 4.658738e-05 |
| 11 | CD96       | T.cells.CD8                  | 0.57208453930540104  | 2.392243e-20 | 1.694665e-16 | TCRBV3S1 | T.cells.CD4.memory.activated | 0.37692472967076701    | 9.106129e-09 | 6.450782e-05 |
| 12 | CCR5       | T.cells.CD8                  | 0.56759448452436001  | 5.464762e-20 | 3.871237e-16 | CD3E     | Macrophages.M0               | -0.37646471842796803   | 9.523075e-09 | 6.746146e-05 |
| 13 | PYHIN1     | T.cells.CD8                  | 0.56237827930338802  | 1.404633e-19 | 9.950417e-16 | FASLG    | T.cells.CD4.memory.resting   | -0.37634048361287598   | 9.638802e-09 | 6.828127e-05 |
| 14 | TBX21      | T.cells.CD8                  | 0.55358729964050801  | 6.643918e-19 | 4.706552e-15 | GZMH     | T.cells.gamma.delta          | 0.37622921558320699    | 9.743602e-09 | 6.902368e-05 |
| 15 | TCRA       | T.cells.CD8                  | 0.54719089731836401  | 2.000348e-18 | 1.417046e-14 | SH2D1A   | T.cells.gamma.delta          | 0.37217732914151602    | 1.440604e-08 | 1.020524e-04 |
| 16 | SIRPG      | T.cells.CD8                  | 0.54705748644250396  | 2.046355e-18 | 1.449638e-14 | TCRBV3S1 | T.cells.gamma.delta          | 0.37159045293262       | 1.523874e-08 | 1.079512e-04 |
| 17 | CD3E       | T.cells.CD8                  | 0.54162350494315303  | 5.122835e-18 | 3.629017e-14 | CD2      | T.cells.gamma.delta          | 0.36825401616657699    | 2.093004e-08 | 1.482684e-04 |
| 18 | TBX21      | T.cells.CD4.memory.activated | 0.54097487108187803  | 5.709548e-18 | 4.044644e-14 | TCRBV3S1 | Macrophages.M0               | -0.36610882344086798   | 2.561888e-08 | 1.814841e-04 |
| 19 | CD2        | T.cells.CD8                  | 0.54094806778885496  | 5.735159e-18 | 4.062787e-14 | PYHIN1   | Macrophages.M0               | -0.3610717171333716898 | 4.094376e-08 | 2.900456e-04 |
| 20 | FASLG      | T.cells.CD4.memory.activated | 0.53712080706523402  | 1.082249e-17 | 7.666652e-14 | NKG7     | Macrophages.M0               | -0.35813324819559      | 5.362451e-08 | 3.798760e-04 |
| 21 | AV1S4A1N1T | T.cells.CD8                  | 0.53222971758203297  | 2.408301e-17 | 1.706041e-13 | CD2      | Macrophages.M0               | -0.357572219991567402  | 5.644191e-08 | 3.998345e-04 |
| 22 | CD244      | T.cells.CD4.memory.activated | 0.52866734971986995  | 4.277698e-17 | 3.030322e-13 | CD96     | Macrophages.M0               | -0.35630263167829301   | 6.335277e-08 | 4.487910e-04 |
| 23 | UBASH3A    | T.cells.CD8                  | 0.52073708591719903  | 1.500416e-16 | 1.062894e-12 | TCRBV3S1 | Macrophages.M1               | 0.348113340968701      | 1.318598e-07 | 9.340946e-04 |
| 24 | TCRBV3S1   | T.cells.CD8                  | 0.52043781156399704  | 1.572178e-16 | 1.113731e-12 | PYHIN1   | T.cells.gamma.delta          | 0.345313156479919      | 1.686190e-07 | 1.194497e-03 |
| 25 | GZMH       | T.cells.CD4.memory.activated | 0.51527043420120999  | 3.497120e-16 | 2.477360e-12 | KLRK1    | T.cells.gamma.delta          | 0.34501835458466801    | 1.730172e-07 | 1.225654e-03 |
| 26 | CCR5       | Macrophages.M1               | 0.51080250503240199  | 6.905780e-16 | 4.892056e-12 | SIRPG    | T.cells.follicular.helper    | 0.34175859228553201    | 2.296030e-07 | 1.626508e-03 |
| 27 | CD96       | T.cells.CD4.memory.activated | 0.51061136741437096  | 7.108174e-16 | 5.035431e-12 | CD8A     | T.cells.gamma.delta          | 0.34103923654592999    | 2.442913e-07 | 1.730560e-03 |
| 28 | NKG7       | Macrophages.M1               | 0.50785840987959496  | 1.075425e-15 | 7.618313e-12 | TRIM22   | T.cells.regulatory..Tregs.   | -0.33580648496911503   | 3.817439e-07 | 2.704274e-03 |
| 29 | CD247      | T.cells.CD8                  | 0.50333487887805595  | 2.106500e-15 | 1.492245e-11 | GZMH     | Macrophages.M0               | -0.333553555714654     | 4.614713e-07 | 3.269063e-03 |
| 30 | TCRA       | T.cells.CD4.memory.activated | 0.49304386624003399  | 9.374883e-15 | 6.641167e-11 | CD96     | T.cells.gamma.delta          | 0.33260232012449298    | 4.997212e-07 | 3.540025e-03 |
| 31 | SIRPG      | T.cells.CD4.memory.activated | 0.49182027797369099  | 1.115893e-14 | 7.904988e-11 | SH2D1A   | Macrophages.M0               | -0.33095685417387599   | 5.731597e-07 | 4.060264e-03 |
| 32 | CCR5       | T.cells.CD4.memory.activated | 0.49097243757921     | 1.258547e-14 | 8.915550e-11 | CCR5     | T.cells.regulatory..Tregs.   | -0.32820159374685298   | 7.197975e-07 | 5.099045e-03 |
| 33 | AV1S4A1N1T | T.cells.CD4.memory.activated | 0.48750997525619799  | 2.049968e-14 | 1.452198e-10 | SIRPG    | T.cells.gamma.delta          | 0.32644302714914603    | 8.314778e-07 | 5.890189e-03 |
| 34 | NKG7       | T.cells.CD4.memory.activated | 0.48703773298692699  | 2.190081e-14 | 1.551454e-10 | TCRA     | T.cells.follicular.helper    | 0.325532703189165      | 8.956171e-07 | 6.344552e-03 |
| 35 | CD8A       | T.cells.CD4.memory.activated | 0.48077585470497802  | 5.212532e-14 | 3.692557e-10 | TRIM22   | T.cells.CD4.memory.activated | 0.32307223334621599    | 1.093513e-06 | 7.746449e-03 |
| 36 | SIRPG      | Macrophages.M1               | 0.47753199468560797  | 8.112180e-14 | 5.746668e-10 | TCRA     | T.cells.gamma.delta          | 0.32060855968350199    | 1.333139e-06 | 9.443957e-03 |
| 37 | KLRK1      | T.cells.CD4.memory.activated | 0.470480554903832    | 2.088192e-13 | 1.479275e-09 | CD247    | T.cells.gamma.delta          | 0.32031591255939501    | 1.364729e-06 | 9.667742e-03 |
| 38 | SH2D1A     | T.cells.CD4.memory.activated | 0.47012672374854098  | 2.188408e-13 | 1.550268e-09 | TBX21    | T.cells.follicular.helper    | 0.31857110311741799    | 1.568433e-06 | 1.111078e-02 |
| 39 | CD244      | Macrophages.M1               | 0.46955763302671799  | 2.359512e-13 | 1.671478e-09 | CCR5     | T.cells.gamma.delta          | 0.31645926754868797    | 1.853905e-06 | 1.313306e-02 |
| 40 | CD8A       | Macrophages.M1               | 0.46635734241684201  | 3.593801e-13 | 2.545849e-09 | CD244    | T.cells.follicular.helper    | 0.31438848684192899    | 2.181526e-06 | 1.545393e-02 |
| 41 | UBASH3A    | T.cells.CD4.memory.activated | 0.46462749359594702  | 4.503361e-13 | 3.190181e-09 | CD8A     | T.cells.follicular.helper    | 0.31323070297612599    | 2.388047e-06 | 1.691693e-02 |
| 42 | KLRK1      | Macrophages.M1               | 0.46384214265961299  | 4.986999e-13 | 3.532790e-09 | FASLG    | T.cells.gamma.delta          | 0.31300207032384503    | 2.430976e-06 | 1.722104e-02 |
| 43 | CD247      | T.cells.CD4.memory.activated | 0.462122007232804    | 6.229878e-13 | 4.413246e-09 | UBASH3A  | T.cells.gamma.delta          | 0.312450703325028      | 2.537550e-06 | 1.797600e-02 |
| 44 | PYHIN1     | T.cells.CD4.memory.activated | 0.45972711656980098  | 8.474836e-13 | 6.003574e-09 | KLRK1    | T.cells.follicular.helper    | 0.31165465896517702    | 2.699303e-06 | 1.912186e-02 |
| 45 | UBASH3A    | Macrophages.M1               | 0.45487611791696603  | 1.569208e-12 | 1.111627e-08 | CD244    | T.cells.CD4.memory.resting   | -0.31105032291689599   | 2.828613e-06 | 2.003790e-02 |
| 46 | CD96       | Macrophages.M1               | 0.45183798179558199  | 2.296704e-12 | 1.626985e-08 | UBASH3A  | T.cells.follicular.helper    | 0.30974281948823001    | 3.128873e-06 | 2.216493e-02 |
| 47 | CD2        | T.cells.CD4.memory.activated | 0.44584663874682401  | 4.814718e-12 | 3.410746e-08 | GZMH     | T.cells.follicular.helper    | 0.309368662607928      | 3.220234e-06 | 2.281213e-02 |
| 48 | FASLG      | T.cells.follicular.helper    | 0.44337874480336997  | 6.503855e-12 | 4.607331e-08 | TRIM22   | Mast.cells.activated         | -0.30849420441623698   | 3.443767e-06 | 2.439565e-02 |
| 49 | SH2D1A     | Macrophages.M1               | 0.43374046662648003  | 2.057142e-11 | 1.457279e-07 | NKG7     | T.cells.follicular.helper    | 0.30816510533661401    | 3.531659e-06 | 2.501827e-02 |
| 50 | CD2        | Macrophages.M1               | 0.42924150358600599  | 3.478225e-11 | 2.463975e-07 | TCRA     | Macrophages.M0               | -0.3029557682197399    | 5.241835e-06 | 3.713316e-02 |
| 51 | AV1S4A1N1T | Macrophages.M1               | 0.42913224415433099  | 3.522535e-11 | 2.495364e-07 | KLRK1    | T.cells.regulatory..Tregs.   | -0.30195883007500901   | 5.648378e-06 | 4.001311e-02 |
| 52 | CD8A       | Macrophages.M0               | -0.42607659527269798 | 5.009720e-11 | 3.548885e-07 | NKG7     | NK.cells.activated           | 0.30152532589874098    | 5.834390e-06 | 4.133082e-02 |
| 53 | KLRK1      | Macrophages.M0               | -0.41958004932915199 | 1.047036e-10 | 7.417201e-07 | GZMH     | T.cells.CD4.memory.resting   | -0.300894817512743     | 6.115356e-06 | 4.332118e-02 |



















|     | Gene             | logFC       | AveExpr    | t         | P.Value      | adj.P.Val    | B        | Gene       | logFC       | AveExpr     | t         | P.Value      | adj.P.Val   | B          | Gene         | logFC        | AveExpr     | t         | P.Value     | adj.P.Val  | B         | Gene         | logFC        | AveExpr     | t         | P.Value     | adj.P.Val  | B         |
|-----|------------------|-------------|------------|-----------|--------------|--------------|----------|------------|-------------|-------------|-----------|--------------|-------------|------------|--------------|--------------|-------------|-----------|-------------|------------|-----------|--------------|--------------|-------------|-----------|-------------|------------|-----------|
| 901 | RAB43            | 0.39578561  | 2.28277954 | 4.286732  | 2.895280e-05 | 0.0008528004 | 2.133303 | MSH1       | -0.85153913 | 1.374980560 | -3.515569 | 0.000550459  | 0.007470659 | -0.5895422 | CHST6        | -0.304080970 | 0.529033953 | -3.058975 | 0.002545671 | 0.02246743 | -1.879577 | H1FX         | 0.301290158  | 6.307071619 | 2.722438  | 0.007090588 | 0.04634904 | -2.892160 |
| 902 | KCNJ15           | 0.90026129  | 1.27140979 | 4.282282  | 2.948509e-05 | 0.0008675221 | 2.116304 | FANCL      | 0.30987452  | 3.423014577 | 3.513969  | 0.000551625  | 0.007509145 | -0.5947106 | EXOC2        | 0.209276597  | 3.008220514 | 3.058780  | 0.002547247 | 0.02247386 | -1.980133 | JAK1         | 0.250285611  | 4.398561511 | 2.722054  | 0.007098512 | 0.04638941 | -2.893145 |
| 903 | TRBV5-4          | 0.46593090  | 0.67415505 | 4.281246  | 2.961047e-05 | 0.0008702461 | 2.112347 | CCT6B      | 0.22297177  | 0.621281314 | 3.512773  | 0.0005555013 | 0.007537040 | -0.5985700 | LOC100526771 | 0.077144043  | 0.118512406 | 3.058571  | 0.002548936 | 0.02248129 | -1.980729 | CBX5         | -0.367184621 | 3.540797714 | -2.721755 | 0.007104689 | 0.04641835 | -2.893912 |
| 904 | AB3              | 0.66171640  | 3.17029308 | 4.279620  | 2.980818e-05 | 0.0008750876 | 2.106141 | ACTR38     | 0.33123979  | 1.883384733 | 3.512401  | 0.000562324  | 0.007543103 | -0.5997731 | AF143871     | 0.157708678  | 0.377471256 | 3.058405  | 0.002550283 | 0.02248570 | -1.981203 | LOC100130557 | 0.144500399  | 0.985277091 | 2.721387  | 0.007112305 | 0.04645636 | -2.894858 |
| 905 | NUP50            | 0.37994992  | 3.07377553 | 4.278938  | 2.989146e-05 | 0.0008765629 | 2.103538 | PRAME      | -0.96885926 | 1.078032788 | -3.512164 | 0.000556965  | 0.007544125 | -0.6005359 | PIPSK1P1     | 0.023863909  | 0.044528796 | 3.058171  | 0.002552181 | 0.02249375 | -1.981872 | SPAT5        | 0.039274682  | 0.053993163 | 2.721305  | 0.007114007 | 0.04645636 | -2.895069 |
| 906 | CD68             | 0.60783116  | 2.18082144 | 4.278010  | 3.000507e-05 | 0.0008789235 | 2.100000 | SLC25A51P1 | 0.03580407  | 0.014200193 | 3.510733  | 0.0005568763 | 0.007574106 | -0.6008314 | DERL2        | 0.234124384  | 4.468273558 | 3.058063  | 0.002552981 | 0.02249375 | -1.982122 | ZNF827       | -0.320071828 | 2.283886669 | -2.720821 | 0.007112619 | 0.04653739 | -2.896823 |
| 907 | PRDM1            | 0.65870196  | 3.29314094 | 4.276647  | 3.017286e-05 | 0.0008828637 | 2.094800 | FAM18B1    | 0.35416845  | 3.611223853 | 3.511507  | 0.000557987  | 0.007555351 | -0.6026582 | HOUA2        | -0.326125842 | 0.850707223 | -3.057869 | 0.002554632 | 0.02250162 | -1.982734 | CCT7         | 0.216191204  | 6.632697013 | 2.720419  | 0.007132355 | 0.04655326 | -2.897341 |
| 908 | LRRN1            | -0.97236083 | 1.12120355 | -4.275527 | 3.031137e-05 | 0.0008859399 | 2.090529 | UMPS       | 0.28819541  | 2.366096822 | 3.510693  | 0.0005595952 | 0.007573226 | -0.6052861 | GGT7         | -0.514758732 | 2.191732182 | -3.057628 | 0.002556586 | 0.02251136 | -1.983421 | LILRB3       | 0.271745574  | 1.061724855 | 2.720174  | 0.007137437 | 0.04657498 | -2.897989 |
| 909 | FBA3             | -0.18418746 | 1.06518221 | -4.275242 | 3.034671e-05 | 0.0008859971 | 2.089442 | MYO1F      | 0.54495264  | 2.598083605 | 3.510546  | 0.0005598838 | 0.007573270 | -0.6057578 | AP1B1        | 0.251422272  | 4.808585687 | 3.056676  | 0.002564327 | 0.02257203 | -1.986137 | NME1-NME2    | 0.295803801  | 6.964733552 | 2.720035  | 0.007140317 | 0.04658232 | -2.898325 |
| 910 | PLCD1            | -0.48827156 | 2.42497494 | -4.274486 | 3.044062e-05 | 0.0008877622 | 2.088561 | MCF2L2     | 0.08142428  | 0.219162034 | 3.509947  | 0.0005610094 | 0.007583463 | -0.6076926 | FAM169B      | 0.167495135  | 0.149273166 | 3.058474  | 0.002565970 | 0.02257901 | -1.986713 | NIF3L1       | 0.215923296  | 3.307917364 | 2.718556  | 0.007171081 | 0.04677152 | -2.902118 |
| 911 | PPPIR14D         | -1.30208937 | 2.59455786 | -4.273282 | 3.059092e-05 | 0.0008911661 | 2.081968 | BCAM       | -0.82749434 | 4.750421992 | -3.509676 | 0.0005612089 | 0.007583463 | -0.6079198 | NFT2         | 0.239374613  | 3.528363466 | 3.055738  | 0.002571975 | 0.02262435 | -1.988813 | FAM63A       | -0.314320308 | 2.939167894 | -2.718422 | 0.007173869 | 0.04677821 | -2.902460 |
| 912 | CDC4122          | -0.45943855 | 1.27903906 | -4.272467 | 3.069289e-05 | 0.0008929357 | 2.078864 | COL16A1    | -0.58643705 | 2.893829809 | -3.509026 | 0.0005628940 | 0.007598521 | -0.6106620 | ELL2         | 0.408176348  | 2.895167940 | 3.055624  | 0.002572907 | 0.02262505 | -1.989138 | MIR3607      | 0.244351942  | 0.621689554 | 2.718249  | 0.007177483 | 0.04678213 | -2.902905 |
| 913 | TBC1D3P1-DHX40P1 | 0.14364683  | 0.12606870 | 4.272260  | 3.071895e-05 | 0.0008929357 | 2.078073 | TSPC2      | 0.31252135  | 0.504043007 | 3.509025  | 0.0005628958 | 0.007598521 | -0.6106650 | ARSI         | -0.371392741 | 0.978360952 | -3.055359 | 0.002575076 | 0.02263662 | -1.989895 | DQ593272     | 0.009472538  | 0.010162707 | 2.718224  | 0.007177996 | 0.04678213 | -2.902968 |
| 914 | TCRAVN1          | 0.37678935  | 0.46723687 | 4.270281  | 3.096837e-05 | 0.0008990817 | 2.070532 | PID1       | -0.74345724 | 2.057791334 | -3.508178 | 0.0005645805 | 0.007613381 | -0.6133981 | ATE1         | -0.396819819 | 3.005719392 | -3.054818 | 0.002579504 | 0.02266803 | -1.991439 | ABHD14A      | -0.328802703 | 3.293194191 | -2.717868 | 0.007185434 | 0.04681911 | -2.903881 |
| 915 | CDNF4            | 0.69601630  | 1.68463609 | 4.269931  | 3.101268e-05 | 0.0008990817 | 2.069199 | SLAMF6     | 0.65830307  | 1.488145890 | 3.507832  | 0.0005652697 | 0.007622811 | -0.6145138 | SCUBE2       | -0.432560913 | 1.067941740 | -3.054570 | 0.002581534 | 0.02267836 | -1.992145 | SERPINF4     | -0.639061153 | 5.701413886 | -2.717661 | 0.007189752 | 0.04683581 | -2.904412 |
| 916 | SNK5             | 0.39234115  | 4.63887246 | 4.269778  | 3.103020e-05 | 0.0008990817 | 2.068618 | KIF7       | -0.36282607 | 1.228284316 | -3.507158 | 0.0005666130 | 0.007637046 | -0.6166846 | TMEM30A      | 0.29671190   | 4.977122114 | 3.054302  | 0.002583725 | 0.02269010 | -1.997500 | ARHGEF10L    | -0.385157304 | 3.217411072 | -2.717047 | 0.007195160 | 0.04685400 | -2.905073 |
| 917 | RPSA             | 0.34933569  | 3.72335105 | 4.269363  | 3.108472e-05 | 0.0008993355 | 2.067036 | TAF1D      | 0.34496883  | 3.424262871 | 3.506779  | 0.0005673705 | 0.007640846 | -0.6179064 | LOXL2        | -0.521378692 | 4.137687115 | -3.053957 | 0.002586562 | 0.02270750 | -1.993693 | AKO57887     | -0.299737484 | 2.477020983 | -2.717358 | 0.007196085 | 0.04689400 | -2.905188 |
| 918 | RAP2C            | 0.31392343  | 3.14506526 | 4.269175  | 3.110856e-05 | 0.0008993355 | 2.066321 | CDV3       | 0.30429938  | 5.156749738 | 3.506865  | 0.0005675590 | 0.007640846 | -0.6182101 | C21orf88     | -0.298967309 | 0.338504353 | -3.053693 | 0.002588728 | 0.02271898 | -1.994644 | SGO2A        | -0.452376312 | 1.845921242 | -2.717121 | 0.007201053 | 0.04687485 | -2.905797 |
| 919 | MIR575           | 0.13196210  | 0.03971497 | 4.268187  | 3.123435e-05 | 0.0009019895 | 2.062558 | RAN        | 0.35645532  | 3.024642353 | 3.506585  | 0.0005677587 | 0.007640846 | -0.6182319 | TLX1         | -0.492560215 | 0.955175677 | -3.053558 | 0.002588634 | 0.02272119 | -1.995029 | SLC9B1       | 0.212466346  | 1.308439996 | 2.716340  | 0.007203368 | 0.04687659 | -2.906800 |
| 920 | TCRB             | 0.44393787  | 0.96448975 | 4.266807  | 3.141087e-05 | 0.0009061011 | 2.057303 | HECTD3     | -0.27064362 | 4.353027027 | -3.505878 | 0.0005691761 | 0.007656039 | -0.6208211 | PSME4        | 0.227568797  | 3.592593603 | 3.053358  | 0.002591478 | 0.02272810 | -1.995599 | KITLG        | 0.462726273  | 3.373445312 | 2.716932  | 0.007204998 | 0.04687659 | -2.906280 |
| 921 | CDC4160          | 0.19439300  | 0.16317363 | 4.262671  | 3.147967e-05 | 0.0009070998 | 2.055263 | E5Y1T1     | -0.36827488 | 4.805643214 | -3.505681 | 0.0005695708 | 0.007657464 | -0.6214457 | ULK1         | -0.317650179 | 4.971222114 | -3.052548 | 0.002597679 | 0.02277153 | -1.997748 | FCGR2C       | 0.255206768  | 0.736570195 | 2.716703  | 0.007209798 | 0.04687659 | -2.906867 |
| 922 | SCLT1            | 0.22079227  | 1.09971564 | 4.264391  | 3.172222e-05 | 0.0009117825 | 2.048107 | LY9        | 0.53402806  | 1.039505031 | 3.505441  | 0.0005700534 | 0.007660074 | -0.6222205 | RBM8A        | -0.192247682 | 3.937637619 | -3.052548 | 0.002598145 | 0.02277153 | -1.997707 | FBLN2        | -0.606234677 | 3.673191099 | -2.716820 | 0.007211534 | 0.04687659 | -2.907079 |
| 923 | UBE2N            | 0.28645680  | 5.56075468 | 4.264250  | 3.174045e-05 | 0.0009117825 | 2.047571 | BDKRB2     | -0.50194050 | 1.933610608 | -3.503887 | 0.0005731822 | 0.007697750 | -0.6272259 | PERP         | -0.585740195 | 8.803505728 | -3.052005 | 0.002602632 | 0.02280332 | -1.999457 | POGK         | -0.220640932 | 4.227801054 | -2.716458 | 0.007214934 | 0.04687659 | -2.907495 |
| 924 | RFC2             | 0.46599041  | 4.10578033 | 4.264213  | 3.174524e-05 | 0.0009117825 | 2.047431 | RPL6       | 0.33471585  | 6.562316665 | 3.503761  | 0.0005734373 | 0.007697750 | -0.6276328 | GZMK         | 0.853144445  | 2.304569257 | 3.051249  | 0.002608876 | 0.02285049 | -2.001609 | UBASH3B      | 0.338697874  | 1.963316615 | 2.716340  | 0.007222005 | 0.04687659 | -2.907787 |
| 925 | SKAP2            | -0.51760216 | 3.63702067 | -4.261735 | 3.206785e-05 | 0.0009193542 | 2.038004 | AKO56351   | 0.23044871  | 0.680056704 | 3.503459  | 0.0005740470 | 0.007702039 | -0.6286045 | SNORD24      | 0.311498943  | 0.988282073 | 3.050787  | 0.002612698 | 0.02287641 | -2.002924 | C5orf52      | -0.230994329 | 0.266333991 | -2.716303 | 0.007218182 | 0.04687659 | -2.907892 |
| 926 | NLR3             | 0.59490308  | 1.28138044 | 4.261656  | 3.207815e-05 | 0.0009193542 | 2.037704 | CNPPD1     | -0.27535846 | 4.856456017 | -3.502812 | 0.0005753581 | 0.007715729 | -0.6306906 | CDCD15       | 0.242810250  | 0.802393143 | 3.050402  | 0.002615890 | 0.02289860 | -2.004021 | OPN5         | 0.008956084  | 0.007433857 | 2.716223  | 0.007219847 | 0.04687659 | -2.908095 |
| 927 | TCRBV14.1--J2.1  | 0.85327774  | 1.76466688 | 4.259422  | 3.237174e-05 | 0.0009265777 | 2.029210 | PAFAH1B3   | 0.53420654  | 4.705060670 | 3.502266  | 0.0005760554 | 0.007721954 | -0.6324467 | TMEM33       | 0.293456707  | 3.884640909 | 3.050148  | 0.002620197 | 0.02307069 | -2.004744 | RB1CC1       | -0.260527889 | 3.345026126 | -2.715683 | 0.007226429 | 0.04687659 | -2.908203 |
| 928 | CHEK1            | 0.54423563  | 2.32940502 | 4.258179  | 3.253618e-05 | 0.0009294938 | 2.024487 | TOP1       | 0.32457553  | 5.118210236 | 3.502203  | 0.0005765934 | 0.007721954 | -0.6326518 | C2orf63      | 0.142285300  | 0.476180487 | 3.048915  | 0.002619931 | 0.02291706 | -2.005407 | FBLX14       | 0.317847213  | 3.787440796 | 2.716719  | 0.007222005 | 0.04687659 | -2.908481 |
| 929 | DNA2             | 0.55227200  | 1.57458660 | 4.258173  | 3.253701e-05 | 0.0009294938 | 2.024483 | TANC2      | -0.44404138 | 1.439172896 | -3.505662 | 0.0005784393 | 0.007721954 | -0.6327912 | VP33A3       | 0.192241567  | 0.401335956 | -3.048933 | 0.002628611 | 0.02307150 | -2.008203 | TBC1D30      | 0.334782204  | 1.336841291 | -2.716340 | 0.007223031 | 0.04687659 | -2.908843 |
| 930 | PHACTR14         | 0.29239227  | 3.61617448 | 4.257554  | 3.261927e-05 | 0.0009308418 | 2.022109 | PXMP4      | -0.33978616 | 2.283745263 | -3.501431 | 0.0005781632 | 0.007734320 | -0.6351378 | LINC00317    | 0.000832551  | 0.001228564 | 3.045630  | 0.002631461 | 0.02300275 | -2.009351 | PCLO         | -0.275308544 | 0.402141128 | -2.715897 | 0.007226687 | 0.04687659 | -2.908930 |

|      | Gene     | logFC       | AveExpr     | t         | P.Value      | adj.P.Val   | B        | Gene      | logFC       | AveExpr    | t         | P.Value      | adj.P.Val   | B          | Gene     | logFC        | AveExpr     | t         | P.Value     | adj.P.Val  | B         | Gene     | logFC        | AveExpr     | t         | P.Value     | adj.P.Val  | B         |
|------|----------|-------------|-------------|-----------|--------------|-------------|----------|-----------|-------------|------------|-----------|--------------|-------------|------------|----------|--------------|-------------|-----------|-------------|------------|-----------|----------|--------------|-------------|-----------|-------------|------------|-----------|
| 1001 | CMTM1    | 0.47205264  | 2.993496796 | 4.178169  | 4.498262e-05 | 0.001192601 | 1.722750 | GXYLT2    | -0.68054619 | 2.02345203 | -3.458166 | 0.0006728148 | 0.008693200 | -0.7736672 | POMT1    | -0.278306328 | 2.728611881 | -3.028092 | 0.002807085 | 0.02397722 | -2.067344 | UGT8     | 0.605764324  | 2.833292978 | 2.699152  | 0.007585951 | 0.04839509 | -2.951696 |
| 1002 | DQ574306 | 0.03305656  | 0.004695953 | 4.177893  | 4.503254e-05 | 0.001192733 | 1.721718 | GINS3     | 0.41003668  | 2.13048627 | 3.457889  | 0.0006734661 | 0.008697381 | -0.7745506 | ILKAP    | 0.197862805  | 3.277008378 | 3.027503  | 0.002812311 | 0.02401413 | -2.069012 | C10orf62 | 0.030204838  | 0.034458799 | 2.698942  | 0.007590561 | 0.04841286 | -2.952231 |
| 1003 | KCNH8    | -0.43936387 | 0.501768666 | -4.177471 | 4.510901e-05 | 0.001193165 | 1.720138 | FAM168B   | -0.34926311 | 4.20521773 | -3.457660 | 0.0006740020 | 0.008700067 | -0.7752768 | DQ583348 | 0.102343737  | 0.047168792 | 3.027372  | 0.002813466 | 0.02401627 | -2.069381 | ZC3HAV1  | 0.199317549  | 3.558731098 | 2.698771  | 0.007594312 | 0.04842514 | -2.952666 |
| 1004 | ZC4H2    | -0.37734362 | 1.379632709 | -4.177307 | 4.513878e-05 | 0.001193165 | 1.719524 | LAMP3     | 0.66657471  | 2.54610890 | 3.457457  | 0.0006744815 | 0.008702025 | -0.7759261 | FEM1B    | -0.283816698 | 3.216912996 | -3.027122 | 0.002815684 | 0.02402747 | -2.070088 | RTP4     | 0.442579708  | 3.384710090 | 2.698295  | 0.007604768 | 0.04848017 | -2.953878 |
| 1005 | FLOT1    | -0.39116673 | 6.118698673 | -4.176374 | 4.530835e-05 | 0.001196456 | 1.716034 | C3orf37   | 0.29786640  | 4.40970082 | 3.457291  | 0.0006748716 | 0.008702751 | -0.7764540 | XKR9     | 0.460940399  | 1.101934127 | 3.026271  | 0.002823247 | 0.02408426 | -2.072494 | TIPIN    | 0.317862605  | 2.490057105 | 2.698067  | 0.007609781 | 0.04850047 | -2.954459 |
| 1006 | TRMT112  | 0.39428083  | 6.818113798 | 4.175834  | 4.540686e-05 | 0.001196955 | 1.714013 | PROC      | -0.60959489 | 1.09115979 | -3.457154 | 0.0006751936 | 0.008702751 | -0.7768896 | CLDN23   | -0.873445598 | 3.633568194 | -3.024903 | 0.002835448 | 0.02418058 | -2.076363 | CCDC79   | 0.022867429  | 0.030692062 | 2.697958  | 0.007612175 | 0.04850408 | -2.954736 |
| 1007 | CLDN18   | 2.45668801  | 5.753129057 | 4.175776  | 4.541743e-05 | 0.001196955 | 1.713796 | TMEM181   | -0.36606625 | 3.51899580 | -3.456684 | 0.0006763002 | 0.008712782 | -0.7783847 | ZNF90    | 0.313422595  | 2.701213351 | 3.023414  | 0.002848779 | 0.02428646 | -2.080570 | BC105019 | 0.006644132  | 0.003016489 | 2.697820  | 0.007615208 | 0.04851176 | -2.955087 |
| 1008 | ACADM    | -0.47323655 | 3.852299780 | -4.174696 | 4.561493e-05 | 0.001200967 | 1.709758 | SAMD3     | 0.30811453  | 6.65088954 | 3.455973  | 0.0006779801 | 0.008730186 | -0.7806496 | MUC6     | -1.681418146 | 3.164712955 | -3.023140 | 0.002851239 | 0.02429842 | -2.081345 | SCN3B    | -0.168644313 | 0.327211005 | -2.697595 | 0.007620168 | 0.04853171 | -2.955661 |
| 1009 | CCDC97   | 0.33598889  | 3.893589258 | 4.173102  | 4.590789e-05 | 0.001207482 | 1.703800 | ARHGEF26  | -0.62467707 | 1.33022004 | -3.455375 | 0.0006793949 | 0.008739746 | -0.7825527 | TYMS     | 0.533944248  | 4.759379384 | 3.023053  | 0.002852013 | 0.02429842 | -2.081588 | AKO96314 | 0.274264369  | 0.530668375 | 2.697423  | 0.007623959 | 0.04854421 | -2.956099 |
| 1010 | ASS1     | -1.29605533 | 5.304164452 | -4.171689 | 4.616917e-05 | 0.001212231 | 1.698518 | C11orf68  | -0.28959176 | 4.63297322 | -3.455229 | 0.0006797392 | 0.008739746 | -0.7830153 | USP48    | 0.236638947  | 2.973443262 | 3.029228  | 0.002853141 | 0.02430023 | -2.081943 | KLHL29   | -0.234182602 | 0.990681844 | -2.696709 | 0.007639693 | 0.04863272 | -2.957915 |
| 1011 | OIP5-AS1 | -0.33704328 | 4.209571260 | -4.171632 | 4.617979e-05 | 0.001212231 | 1.698304 | ANKRD16   | -0.24950015 | 1.54389751 | -3.455176 | 0.0006798649 | 0.008739746 | -0.7831841 | HOKA4    | -0.547788819 | 1.934676732 | -3.022719 | 0.002855015 | 0.02430839 | -2.082532 | AFAP1L2  | -0.457323204 | 2.090198960 | -2.696579 | 0.007642571 | 0.04863937 | -2.958246 |
| 1012 | ZNF8     | 0.28044036  | 3.042608478 | 4.169805  | 4.651971e-05 | 0.001219947 | 1.691479 | PTP4A2    | -0.26580498 | 5.79675535 | -3.454871 | 0.0006805895 | 0.008739746 | -0.7841566 | HTT      | 0.268717383  | 3.186372576 | 3.022260  | 0.002859149 | 0.02433578 | -2.083829 | AGA      | 0.261390894  | 2.868170298 | 2.696244  | 0.007649961 | 0.04865520 | -2.959088 |
| 1013 | PSMD9    | 0.28317050  | 3.828570420 | 4.167753  | 4.690439e-05 | 0.001228821 | 1.683816 | COL1A2    | -0.77040171 | 8.15598170 | -3.454867 | 0.0006805990 | 0.008739746 | -0.7841694 | INPP5A   | -0.357867092 | 3.587693984 | -3.021870 | 0.002862660 | 0.02435725 | -2.084930 | DQ578778 | 0.022241120  | 0.004847025 | 2.696229  | 0.007650296 | 0.04865200 | -2.959136 |
| 1014 | CDX1     | -2.21492756 | 3.075595953 | -4.166426 | 4.715482e-05 | 0.001234163 | 1.678861 | CUL1      | 0.22582297  | 3.93483997 | 3.454825  | 0.0006806984 | 0.008739746 | -0.7843026 | CMIH4    | -0.263010430 | 3.173112105 | -3.021776 | 0.002863508 | 0.02435725 | -2.085196 | AKO21933 | 0.142338319  | 0.457243996 | 2.695841  | 0.007656878 | 0.04870811 | -2.960124 |
| 1015 | TMP0     | 0.49663526  | 4.37666714  | 4.164577  | 4.750592e-05 | 0.001242128 | 1.671958 | LOC149837 | -0.35348706 | 0.78140322 | -3.454614 | 0.0006811986 | 0.008741939 | -0.7849732 | RASSF10  | -0.668438113 | 1.260174221 | -3.021239 | 0.002868349 | 0.02439062 | -2.086711 | GNPTAB   | -0.202621555 | 2.990993171 | -2.695359 | 0.007669548 | 0.04876429 | -2.961350 |
| 1016 | BC070363 | -0.72330050 | 2.299498885 | -4.163653 | 4.768213e-05 | 0.001245008 | 1.668513 | GM2A      | 0.48279787  | 4.50946871 | 3.453208  | 0.0006845433 | 0.008780617 | -0.7894446 | CD33     | 0.728869149  | 4.506133287 | 3.020752  | 0.002872750 | 0.02441165 | -2.088086 | DKK3     | -0.502761660 | 4.643075415 | -2.694091 | 0.007697658 | 0.04892220 | -2.964572 |
| 1017 | HABP2    | 1.43221228  | 2.362811700 | 4.162768  | 4.785176e-05 | 0.001248710 | 1.665209 | LYSMO1    | -0.25768078 | 3.20107076 | -3.452824 | 0.0006854600 | 0.008787623 | -0.7906662 | LPCTA1   | -0.495300283 | 4.096388157 | -3.020735 | 0.002879209 | 0.02441165 | -2.088136 | NUDT22   | -0.230150442 | 4.110847165 | -2.694073 | 0.007698071 | 0.04892220 | -2.964619 |
| 1018 | ZNF550   | -0.40237828 | 1.251068090 | -4.162029 | 4.799367e-05 | 0.001251183 | 1.662454 | CCDC18    | 0.29215616  | 1.12147223 | 3.452549  | 0.0006861176 | 0.008787623 | -0.7915416 | TTC17    | -0.233496089 | 3.302540360 | -3.020660 | 0.002878582 | 0.02441165 | -2.088346 | CCDC138  | 0.275988477  | 1.392324260 | 2.693910  | 0.007701687 | 0.04893346 | -2.965033 |
| 1019 | AX148339 | 0.35565600  | 0.855649982 | 4.161699  | 4.805728e-05 | 0.001251335 | 1.661222 | PHI02     | 0.25498087  | 1.15471715 | 3.452521  | 0.0006861850 | 0.008787623 | -0.7916312 | OSTBETA  | -0.546765698 | 1.114090341 | -3.020346 | 0.002878629 | 0.02442801 | -2.089234 | RPS15    | 0.268241295  | 9.216911505 | 2.693807  | 0.007703973 | 0.04893627 | -2.965294 |
| 1020 | HQB3     | -0.72729840 | 2.455143205 | -4.161509 | 4.809380e-05 | 0.001251335 | 1.660514 | ZNF831    | 0.29779550  | 0.43253345 | 3.452425  | 0.0006864140 | 0.008787623 | -0.7919359 | PLEKHA7  | 0.395452648  | 2.747016013 | 3.019938  | 0.002880123 | 0.02444752 | -2.090385 | SEC14L4  | -0.467757221 | 0.726687219 | -2.693613 | 0.007708301 | 0.04895204 | -2.965789 |
| 1021 | SLC31A2  | 0.45342610  | 2.562875744 | 4.161242  | 4.814539e-05 | 0.001251450 | 1.659517 | ZNF740    | 0.25974051  | 2.72898635 | 3.451988  | 0.0006874589 | 0.008796755 | -0.7933243 | CHD3     | 0.396101607  | 4.029720244 | 3.019889  | 0.002880568 | 0.02444752 | -2.090523 | GNA15    | 0.452138278  | 2.311363999 | 2.692940  | 0.007732385 | 0.04903132 | -2.967499 |
| 1022 | JPH1     | -0.90794777 | 1.721127992 | -4.160961 | 4.819958e-05 | 0.001251633 | 1.658470 | ADCK3     | -0.41951930 | 3.38443169 | -3.451587 | 0.0006884201 | 0.008802338 | -0.7945997 | HIF1AN   | 0.242113502  | 2.856483487 | -3.018741 | 0.002890988 | 0.02452811 | -2.093762 | ZNF749   | 0.210753826  | 1.423443472 | 2.698286  | 0.007724807 | 0.04903132 | -2.967635 |
| 1023 | CNLY     | 0.92849886  | 2.845295878 | 4.160576  | 4.827400e-05 | 0.001252340 | 1.657035 | PRKAB2    | -0.40992122 | 2.62439040 | -3.451424 | 0.0006888114 | 0.008802338 | -0.7951185 | AF119915 | 0.060980616  | 1.198191490 | 3.018605  | 0.002893228 | 0.02453079 | -2.094146 | THOC3    | 0.323138419  | 2.696617364 | 2.695219  | 0.007732674 | 0.04907760 | -2.968569 |
| 1024 | KIF2A    | 0.42266301  | 3.102090947 | 4.159999  | 4.838578e-05 | 0.001254014 | 1.654883 | SRPK3     | -0.52611808 | 0.98394665 | -3.451156 | 0.0006894539 | 0.008802338 | -0.7959695 | PGD      | 0.383330902  | 5.802221038 | 3.018446  | 0.002893673 | 0.02453520 | -2.094594 | ZNF547   | 0.213348322  | 1.805348200 | 2.693272  | 0.007735944 | 0.04907744 | -2.968941 |
| 1025 | RNF208   | -0.70750070 | 2.723835257 | -4.157657 | 4.884182e-05 | 0.001264598 | 1.646155 | ORBD4     | 0.02304585  | 0.01022392 | 3.451047  | 0.0006897170 | 0.008802338 | -0.7963177 | HOXB-AS3 | -0.602001940 | 2.017168174 | -3.017806 | 0.002899500 | 0.02456732 | -2.096398 | LRP4     | -0.529366672 | 1.555998906 | -2.692312 | 0.007737293 | 0.04907744 | -2.969095 |
| 1026 | TNFSF18  | 0.41571813  | 0.467888557 | 4.157085  | 4.895396e-05 | 0.001265384 | 1.644022 | AKO92451  | 0.05593662  | 0.10727543 | 3.451026  | 0.0006897684 | 0.008802338 | -0.7963831 | SERPINB2 | 0.693632801  | 0.823977249 | 3.017772  | 0.002899812 | 0.02456732 | -2.096495 | TCF20    | 0.256947780  | 3.653129797 | 2.691149  | 0.007763295 | 0.04923060 | -2.972049 |
| 1027 | CLEC4A   | 0.44825199  | 1.432431415 | 4.157015  | 4.896756e-05 | 0.001265384 | 1.643763 | KRCC1     | -0.45702284 | 3.56372039 | -3.450902 | 0.0006896035 | 0.008802338 | -0.7967762 | ARTN     | -0.341519340 | 0.615963522 | -3.017725 | 0.002900238 | 0.02456732 | -2.096626 | MIR1470  | 0.058921420  | 0.045491888 | 2.690266  | 0.007783087 | 0.04934433 | -2.974291 |
| 1028 | ANP32AP1 | 0.06141706  | 0.070038581 | 4.155856  | 4.919550e-05 | 0.001270038 | 1.639442 | PCSK1N    | -1.58536299 | 3.02154629 | -3.450339 | 0.0006902168 | 0.008802338 | -0.7969790 | RNF186   | -0.916265987 | 2.018076249 | -3.017376 | 0.002903426 | 0.02456848 | -2.097611 | DEFB110  | 0.013463897  | 0.002560749 | 2.690161  | 0.007785451 | 0.04934752 | -2.974558 |
| 1029 | TRMT12   | -0.35856366 | 2.407685790 | -4.154643 | 4.943495e-05 | 0.001274980 | 1.634925 | MEGF8     | -0.46583078 | 1.96271970 | -3.450054 | 0.0006921053 | 0.008822162 | -0.7994730 | IGFL3    | 0.175305370  | 0.161735754 | 3.017216  | 0.002904888 | 0.02459101 | -2.099063 | QRFP     | 0.149923374  | 0.306071664 | 2.698986  | 0.007789373 | 0.04935225 | -2.975002 |
| 1030 | PRKAG2   | -0.37772868 | 1.934802822 | -4.154160 | 4.953055e-05 | 0.001276205 | 1.633128 | CGREF1    | -0.59303993 | 2.27103486 | -3.449605 | 0.0006931873 | 0.008831732 | -0.8008989 | HMMR     | 0.519046533  | 2.797419851 | 3.015785  | 0.002919784 | 0.02466939 | -2.102096 | ZNF498   | 0.181224302  | 1.527998356 | 2.689662  | 0.007789915 | 0.04935225 | -2.97506  |

Supporting Material 6B: EBV–HEMG signature

|    | EBV.HEMG                                                                                                                                                                                                      |
|----|---------------------------------------------------------------------------------------------------------------------------------------------------------------------------------------------------------------|
| 1  | MLYCD,C1orf115,ECHDC2,SLC6A8,SCNN1A,HSD17B12,DNAJA4,ACPL2,PPP1R1B,DUSP23,PPIC,MAP1LC3A,PHYH,ZNF480,NMNAT3,KCNK6,CAMK2N1,TP53I13,FAM71E1,WNK2,SARM1,ZNF32,CERK,GOLT1A,DSC2,LZTFL1,ZNF669,PPARA,NMB,TMEM117,    |
| 2  | HOXA10,CISD1,DAZAP2,FBXO44,PDE4A,SLC46A1,B3GALT4,TCEA3,PPIE,DBN1,BMP8B,ZNF416,NOL3,FUT6,TPD52L1,YBX2,HOXA6,RAB11FIP5,PODXL2,CDH17,FAM114A1,C10orf116,FUT3,A2LD1,NINL,NDRG1,RCOR2,UBXN10,CDX2,RIPK3,           |
| 3  | TTC22,PCYOX1,MAPRE3,FAM188A,C9orf129,F12,BAIAP2,RAB36,RHOD,KBTBD10,HYLS1,FARP1,C2orf70,ANXA5,LOC148189,MFSD6L,FAH,PKN3,B3GALNT1,LOC440335,IRS2,FN3K,FAM174A,PRKCDBP,TFF3,MAPK14,SLC22A3,MT1G,C1QTNF1,HOXB7,   |
| 4  | KRT7,AMIGO1,SCRN1,PLOD2,MATN2,LDLRAD3,ARL13B,CDKN1C,TMEM65,LTBP3,CHRM3,ADM2,SNTA1,C7orf41,SLC44A4,C2CD4B,HOXA5,NELF,PRMT6,EPPK1,PPP3CA,OSBP2,LYRM2,CIB2,ULK2,HSPB1,OBSL1,CCNI2,HOXB9,ZXDB,                    |
| 5  | ESPN,DSG2,GRIN2D,SULF2,GGT6,HES4,CHPF,MGA,HOXC11,HEPH,NKD2,MYO7B,C4orf48,IGSF8,KCNK15,CCDC149,FADS3,FBXO2,GPR162,LEPRE1,ProSAPIP1,TRPM2,RHOF,ZNF91,TTC14,SH3PXD2A,NR1I2,KHDRBS3,FAIM,C19orf43,                |
| 6  | ENTPD8,HES6,SEPN1,LOC388588,NHLRC1,ANKH,LONRF3,PINK1,ZNF718,SHF,PTGS2,SNX33,TMEM220,ESD,NEURL1B,HOXC10,TMEM168,LRRC8E,PLEKHG3,FLYWCH2,CDCA7L,RIMKLA,CXorf26,GLB1L2,ICA1,ABTB1,NUDT19,P4HA2,GPR153,PIGZ,       |
| 7  | HDAC11,FAM59B,DPP4,SLC25A4,FAM3B,GSTP1,TPBG,BAHCC1,MUC20,KBTBD11,FAM84A,PLA2R1,ARRDC4,CERCAM,PPP2R5B,SLC4A3,RNF144A,AIFM2,ABCD1,SLC36A4,ALG1L,SHISA4,ACAA2,EMP2,VWA2,TRAPPC9,ZNF514,ZNF185,C16orf5,MAPK15,    |
| 8  | FAM109B,ACHE,ACY1,PAOX,UNC45A,KLF7,MAGED1,LRRC6,FLJ90757,IL28RA,LAPTM4B,PLK1S1,TMEM52,SCMH1,LPCAT2,WFDC2,GUCY2C,LRRN1,PLCD1,PPP1R14D,SKAP2,SLC16A10,KIAA1383,TMEM9,CLRN3,COBL,ST6GALNAC4,HOXA11,LARP6,RIOK3,  |
| 9  | KLF11,ASAH2B,BMP4,MPZL1,FAM65A,CITED4,THEM4,CNTD2,ZNF37A,KCNH8,ZC4H2,FLOT1,ACADM,ASS1,CDX1,HOXB3,JPH1,RNF208,TRMT12,PRKAG2,C5orf42,FNDC4,PFN2,FZD1,FAM174B,BCAS4,PNPLA2,FAM50B,MID2,MYO1C,                    |
| 10 | SLC16A4,KLK1,TMEM120B,THNSL2,MXRA7,FOXO3,PRRX2,PDLIM4,C1orf88,CA9,PIGM,VANGL2,SERINC2,ZXDA,EPDR1,SLC25A29,TMEM171,ZBTB7B,PLIN2,ESYT3,MAGIX,SIGMAR1,MIR196A1,CRAPBP2,PTK6,SNX21,NGG12,MIR196B,GPC1,SEMA6A,     |
| 11 | ERN2,SLC6A20,FOXJ1,TBX3,NPW,WDR72,SLC20A2,OSBPL5,PDE9A,DTD1,C2orf65,ASCL2,LOC389332,SLC25A23,KLHL35,RAB6B,MLXIPL,MFAP3L,PROS1,TMEM192,RAB34,BMP7,SCARA3,MAPK8IP1,FABP1,TM4SF20,TPPP3,ARHGEF10,CACNG4,SELM,    |
| 12 | TMEM55A,ABHD11,ISYNA1,DUOX1,ADM,NSUN5,ANKRD9,TM6SF2,MEIS3P1,BAI2,QPRT,CTDSP1,ADAMTS17,KCTD11,SHC1,SPIN3,GFPT1,ADRA2C,B3GNT8,SLC7A4,JAG2,CCDC24,APCDD1,EPHX1,ZNF649,HOXA13,CTSF,CXorf61,TUBB6,PURA,            |
| 13 | TDRD5,GLOD5,SETD7,CUTA,SLC38A1,MFAP2,PRDM5,FAM3A,CD276,DNAJC4,TRIM68,BEGAIN,RANBP17,BCL2L10,HDAC5,ILVBL,SMAD5,ROCK1,BNIP3,TMEM61,KCNH2,FBXL2,VEGFB,EIF3L,SLC16A2,MIB2,DIP2C,ILDR1,UNC93B1,TEAD2,              |
| 14 | MT1L,PHGDH,ADIPOR1,SLC29A4,PAK6,RBP4,NPNT,SLC39A13,FOXD1,ANPEP,EGFR,RAB15,HSPA1L,LRRC58,SOBP,TIMP2,LTk,SHC2,NT5C3L,GNAI1,ST6GALNAC2,SNX19,TFAP2C,CAPN9,C5orf62,KRBA1,ACSS1,MARVELD1,KISS1,CTF1,               |
| 15 | KCNIP3,BRD3,EIF2C4,ABHD8,LRRC3,DACT1,DYM,ITM2C,SNED1,PTGR1,LRRN4,GBE1,CKB,MMP17,HLTF,LARP4,MAMSTR,KCNQ4,INF2,ZNF841,CILP2,SLC39A4,PHKA1,MGST3,MT1M,FAM20C,NOV,WNT7B,SYT7,PLCB1,                               |
| 16 | PLEKHG5,NPTXR,OSR1,NEK3,CYP2R1,HPS1,PDZRN3,ZNF844,KIAA1586,MSRA,PPP1R9A,STMN3,MIB1,PITRM1,GPRIN1,MMP2,OGDH,ARMCX3,PF4,TFR2,DST,TP53INP2,RTN4,WTIP,ABLIM2,SMOC1,TLCD1,F10,MSI1,BCAM,                           |
| 17 | COL16A1,PID1,KIF7,HECTD3,ESYT1,BDKRB2,PXMP4,PLD2,WISP3,FAM171A2,C8orf47,C16orf45,LPPR2,ABHD15,GPR158,PGM1,SH3PXD2B,REEP6,CDR2,HMGCS2,FBXO41,SCIN,RUSC2,GPSM1,GXYLT2,FAM168B,PROC,TMEM181,PTP4A2,COL1A2,       |
| 18 | LOC149837,SRPK3,PCSK1N,MEGF6,CGREF1,C16orf58,SPIRE1,CCDC48,HK1,RGN,PYROXD1,ALS2CL,ARPC1B,AFG3L2,RPL39L,PRPF40B,PPP1R11,HRH1,APLP1,ME1,GATA2,METRN,LPAR1,LOC645166,PPL,ENPP5,ASAP3,ENDOD1,TSPAN18,ABCC6P2,     |
| 19 | NMU,RALBP1,BCKDHB,PTP4A3,FMO5,WIP1,PRSS21,FGF18,TNNC1,NFATC4,ZNF530,TNFRSF10D,G0S2,VWA1,SULT1A2,IGFBP4,WWTR1,SLC34A2,C20orf195,RXFP4,OLFM1,BAG3,CCNE1,SLC25A27,COL1A1,MOCS1,COL5A1,MYOM3,LZTS2,TBCEL,         |
| 20 | CRABP1,C9orf24,FAM132A,SLC9A3R2,PBXIP1,ZNF702P,GNAL,OPN3,DCHS1,SATB1,PARM1,CHST5,SERP2,PLXNB3,WNK4,SPON1,SACS,MT1H,AGPAT1,PCDH20,PPP2R3A,BCORL1,IAH1,ETNK2,ANO7,ARHGEF4,HOMER2,RILPL1,FBLN1,NRSN2,            |
| 21 | IL17RD,KIF12,KIAA1598,ERO1LB,C4BPB,FADS1,RAB3IL1,WBSCR27,ST3GAL4,ITGA5,KBTBD7,TMEM151A,MYH10,DPYSL3,SNAPC2,ADRA2A,MGLL,SMO,FAM103A1,CYP2W1,CHP2,NR3C2,RASGEF1A,EGR4,C6orf123,NPM2,TNFRSF11B,OXT,ORAI3,CAV2,   |
| 22 | PLA2G4F,TM4SF4,YPEL3,SYT1,TRAF5,FAM131C,SLC25A34,HSPA12A,ARVCF,TGFB1,PRNP,ULBP3,MPP6,PDGFRL,BEX5,COL9A3,NACAD,SIX2,LIPE,VSTM2L,KLK10,MAPK3,RASA3,VWA5A,NEIL1,KCNK9,ARHGDIG,H2AFY2,TPM2,GRAMD4,                |
| 23 | MAGED2,HAPLN4,TRIM54,EFA1,TSPAN7,AATK,MESP2,CHRD,TMEM158,TMEM231,MXRA5,NT5DC3,SEMA4F,NR0B2,TTC28,AHNAK2,IGSF3,GABRB3,TNRC18,PHGR1,PCOLCE,SCARF2,FXYD4,WFS1,PKIG,PAQR5,MX2,XYL1,ERGIC1,PXDN,                   |
| 24 | ECE1,GALNT3,DNAL1,AKR1C4,EPHX4,SCG5,FKBP9,CAPS,TMEM2,C3orf70,STK32C,FAM171B,CLU,CNPY4,MEF2D,MYRIP,KCNMB4,RMND5A,KLHL24,GRINA,GGT1,NGFRAP1,ULBP2,NEU4,MEIS3,HOTAIR,UCHL1,LEFTY1,RGS11,FAM92A1,                 |
| 25 | TSPAN2,MARK1,KIF26B,MAP4K2,CCDC107,DGKD,ANGPTL4,CHST6,HOXA2,GGT7,ARSI,ATE1,SCUBE2,LOXL2,C21orf88,ULK1,SDC2,PLSCR4,NBEA,SULT4A1,PLEKHB1,CHN1,CCL28,CHST10,SH3RF3,KIF26A,CCNJL,DEPDC7,COL6A1,SLC3A1,            |
| 26 | RARRES1,HYI,PRLR,CELSR1,POMT1,FEM1B,CLDN23,MUC6,HOXA4,INPP5A,RASSF10,LPCAT1,OSTBETA,ARTN,RNF186,FBXO32,FAM126A,PITX2,NRTN,ADAMTS9,HOXA1,ZHX2,SEMA4C,ERLIN2,MSX1,MESP1,SLC7A9,GAL,PRKAB1,MAFK,                 |
| 27 | AKR7L,NANOS3,COL12A1,TGFB1I1,ARHGAP6,FRG1B,IGFBPL1,EPHB1,YES1,ZNF141,CCDC74A,PAQR7,SCARB1,DIRAS3,RHOBTB3,OLFM2,PLA2G16,ARHGEF17,FAM83F,FSCN1,KLHDC9,PON1,BACE1,CD109,FAM127C,DPEP1,RNASET2,TRAM2,MRI1,EEF1A2, |
| 28 | C11orf53,CAP2,PELI3,ALDOC,TPST1,PRKAA2,GJB5,KCNJ3,SRPX,PYCR2,PBX1,ZFP3,LIMCH1,ZIC5,ASB13,P2RY2,MXI1,FOXF2,MICAL2,HOXB13,MYEF2,CADPS,MUC12,ABLIM3,FGD1,SFRP4,SATB2,PTPRN2,TRIM47,RET,                          |
| 29 | TNNC2,MME,SDK2,MYO18A,CENPB,HOXB8,EHD2,MXRA8,BRSK2,PTRF,CCDC136,NUP62CL,H19,FJX1,PPP1R3G,SLC26A11,MCF2L,IER3,RORC,DCBLD2,C10orf125,FIBCD1,SV2A,PCBP3,FAM19A5,PALM,CYP2B6,ZNF467,SRMS,GMPR,                    |
| 30 | ZNF615,GALNTL2,DIRAS1,COL6A2,WNT5B,NAPG,B3GNT9,NQO2,FAM176A,RAB3B,SEMA6C,DACT2,FGFR1,SLC35B2,ACE,SELS,GCNT3,B4GALNT4,ANTXR2,DAPK3,STARD4,ALPI,AS3MT,NR4A1,TMX4,ADRA1D,CLGN,KIFAP3,ITGA7,CTBP2,                |
| 31 | ZNF577,KLHDC5,CCDC90A,ZNF274,MAPK8IP2,SSBP2,KRT17,SALL2,DSEL,DACH1,APOOL,C14orf132,SHISA2,NOTUM,ARMCX2,DFNB31,MEF2A,SMAD9,XPNPEP2,CACNA2D2,ATP2C2,MUC2,FKBP1B,GLIS2,ROCK2,FSTL3,TIGD5,TNFAIP8L1,L1CAM,TNNI3,  |
| 32 | KIAA1324L,COL6A3,MMP24,KDELRL3,EFCAB4B,KLC4,NT5E,KRT20,GNE,TFCP2L1,UAP1L1,ORM1,PTGER1,ZSWIM4,MRGPRF,NUAK2,COX6B2,RGMB,PFKFB2,GOLGA8B,LRRC10B,FAM110C,PTPN18,FAM3D,HIP1,SH3BP4,APBB1,RARRES2,VIPR1,CARD14,     |
| 33 | SLC16A9,ELN,CBX5,ZNF827,ABHD14A,SERPINF1,ARHGEF10L,FBLN2,PCLO,GALNS,EGFL7,KCNK3,GDPD5,CIDECD,TUBA4A,C1orf198,BGN,ADAMTSL4,CSDE1,PHF1,PTPRU,TSPAN9,ESPNL,TRIM2,AFAP1L2,DKK3,SEC14L4,LRP4,DPM3,BHLHE41,         |

Supporting Material 6C: EBV–HOMG signature

|    | EBV.HOMG                                                                                                                                                                                                      |
|----|---------------------------------------------------------------------------------------------------------------------------------------------------------------------------------------------------------------|
| 1  | ZNF683,FCRL6,IFNG,ATP2C1,FASLG,GZMH,ITGAE,CD244,ATP2A1,DDB2,SIGLEC8,JAKMIP1,CASP4,FAM115C,CD101,RTBDN,CR TAM,GBP5,IL18RAP,XCL2,TBX21,SYCE2,GZMB,DNAJC5B,PRKCQ,KLRK1,APOC1P1,SLC26A9,HAPLN3,BAX,               |
| 2  | LOC400043,SLA2,TIFAB,LAP3,C5orf20,XCR1,FAM26F,IDO1,CLEC12A,UBE2L6,CD8A,RCL1,KLRD1,ARHGEF3,OR56B1,THEMIS,DPY19L1,NGGT2,HAS3,LAG3,GBP4,CCR5,PRKCG,ACAD8,IRF1,GFI1B,CTSC,FDXR,LT A4H,RASGEF1B,                   |
| 3  | C19orf38,GPR25,ADAMDEC1,CCL5,IL18BP,JAK2,SUCNR1,FCGR1A,B2M,SIDT1,MDM2,NKG7,SES N2,PSMB10,IKZF2,ACER3,CD226,C4orf36,GBP1,IL21,C5orf56,C14orf105,CD40,UBASH3A,HPS5,APC2,SLC9A7,KDELC2,APOL4,CD274,              |
| 4  | AMH,SCML4,SLFN12L,VRK2,TRIM24,SUSD4,FHDC1,APOL6,UBE2Z,COL22A1,PSPC1,CD200R1,SFMBT2,PAPD4,POLQ,DUT,ANKRD24,ZNF793,ETV7,TRIM26,HNRPLL,GOLPH3,ALDH16A1,GRAP2,GZMA,CD8B,STAT1,ZNF434,SYNE2,TMEM86A,               |
| 5  | SMTNL1,PRF1,CD38,ADORA3,EI24,ZFYVE28,ACPP,CD3G,BBC3,CD74,APOL3,KLRC1,C1QA,C1QB,ZNF267,SLC35D2,CASS4,CX3CL1,ZNF222,BRIP1,IL12RB1,EED,GABBR1,PRPS2,HOXC4,ITGB7,LGMN,SIRPG,PCNA,PVRL1,                           |
| 6  | RAB33A,ZDHHC18,GFI1,MCM5,GTPBP8,KIAA0101,CACNG8,PLCH1,NRAP,CII TA,CHPT1,BCL2L11,PSMA1,TFEC,MTF2,C4orf21,STAT4,GABPB1,C11orf93,LSM12,TRIM10,KDM2B,SAMHD1,MEI1,GAB3,RASGRP1,NCR1,TMEM101,MLLT3,H2AFX,           |
| 7  | RQCD1,PTPN22,EIF4E,LACTB,PLCXD2,ADAM28,SCAND3,SPATS2,UBD,NUP35,PDCD1LG2,PRR22,APOBEC3F,BUD13,RRM2B,TAP1,AEN,SYTL3,SLAMF8,CPOX,HNRNPD,PYHIN1,ZNF226,MMP25,ALG9,RPS6KB2,PRAM1,HAT1,WDFY1,PIK3R6,                |
| 8  | SLC38A9,BTN2A2,PPP2R2B,ZCCHC8,TNFSF14,FAM110A,C12orf75,PSME2,CLEC7A,RPE,CBX2,HLA–DQB2,EIF4A1,AOAH,PSTK,ATR,C1QC,IRAK3,HPRT1,CD47,ACAD9,CCDC78,ALOX15B,IL2RA,VSIG8,UNC5CL,KCTD5,NUDC,IL2RB,SNRPA,              |
| 9  | PLA2G2D,FCGR3A,IL15RA,MS4A6A,ZNF286A,GAD1,ATIC,TMEM218,C8A,RPS19,TTC12,NECAP2,CTLA4,TAP2,NMI,CD2,HDAC1,HLA–DPA1,RARRES3,NFAM1,HLA–DOA,TMIGD2,ARHGAP19,ARPC3,TNFSF13B,MRPL44,ATP11C,PLA2G7,IL29,EIF3M,         |
| 10 | PLA1A,UTF2B,IL18,LIG1,CD3D,MPHOSPH6,PANK2,QSER1,CLUAP1,CLP1,GCA,ICOS,RCN1,C6orf211,HLA–DRA,HIST2H2AB,SNRPF,IL21R,FAM122C,MOV10,BIRC3,CD80,ASCC3,AGFG2,DOK2,HAVCR2,MCM3,ANKMY1,ZNRF1,AMICA1,                   |
| 11 | E2F7,HLA–DPB1,FAM117B,EXOC6,AMOT,DEPDC1B,HLA–DMB,RFFL,MTAP,CABIN1,SCO1,ARPC5L,MANEAL,HLA–DQB1,M6PR,FANCM,SH2D1A,ZNHIT3,REC8,MED17,MRPL28,RAB43,KCNJ15,ABI3,NUP50,CD86,PRDM1,CD247,RPSA,RAP2C,                 |
| 12 | UBE2N,RFC2,NLRC3,CHEK1,DNA2,PHACTR4,TBC1D12,AQP11,AK2,RNF19B,ITK,ART3,THYN1,HLA–DMA,CCR8,CHAF1B,AIF1,USP28,NLRC5,TRAT1,TALDO1,LILRB4,NFKB1,STRADB,SOCS1,MS4A7,HLA–DRB5,CMTM1,CLDN18,CCDC97,                   |
| 13 | ZNF8,PSMD9,TMPO,HABP2,GNLY,KIF2A,CLEC4A,CDC25A,HELLS,ARL6IP6,CD3E,ZAP70,SIGLEC10,CENPM,ARF3,TMEM194B,PASK,CD6,SPN,CCDC134,PBX4,ZNF227,CD300A,CMKLR1,CD33,C6orf130,EZH2,RFX7,HOMER1,CASP1,                     |
| 14 | DAZAP1,PCDP1,CHORDC1,BTF3,NPM1,C4orf32,MCM2,ICAM1,PAQR4,GPRC5B,MRPL11,ZNF689,ITGAL,CXCL17,MAP3K5,ALDH3A1,GDPD1,C12orf5,ACOT7,TNFAIP8L2,C6orf141,RANBP6,SSFA2,TFAM,CXorf65,GRWD1,RAPGEF2,TTC26,FOXP3,C10orf81, |
| 15 | CEACAM21,PPA1,NPL,IRF2,SLBP,SNX20,CLCN5,CDKN2AIPNL,SYPL1,CNPY2,EBI3,ZNF155,SYCP3,ZNF195,RHEBL1,PTGES3,TIGIT,TMED5,CCR2,PKP4,KIAA0753,ZW10,CCDC153,GPR65,CBFB,CCL17,PRKY,UTP18,FYB,TRAFD1,                     |
| 16 | HMGN2,PRMT1,TP53,NCK1,FUT8,C8orf80,IL12RB2,CASP2,SLC44A1,IFT57,RCC2,ZNF616,PTAFR,LAX1,ZNF655,NEK4,LRIG3,EOMES,LIPA,ALPK1,MTHFD1L,ZNF202,TBC1D10C,GSDMC,CCR6,SIGLEC7,FIGNL1,BST2,GYS1,SLC35B1,                 |
| 17 | POLE,TBK1,RNF166,IL6R,MPND,HEATR3,TPK1,BCL11B,NOL11,ST8SIA4,UTF2H3,SOX21,MSX2,CCDC109B,TBXAS1,NOB1,LMNB1,FAM133B,TMEM106A,LCP2,EPHA4,BCAT2,CALCOCO2,MS4A4A,MAP4K1,MDK,MTG1,RRM1,KHSRPLGALS9,                  |
| 18 | ARHGAP9,IKZF3,OASL,RRM2,SLC10A5,TRIM21,RPA3,TUBA1B,TEX10,SHPK,RPL24,PSMB9,AKAP5,PSMB6,ZMYND8,RABGAP1L,ZBP1,PCGF6,GEMIN7,PATL2,RB1,RGS10,FAM78A,ANKMY2,IL10,BATF,CD209,CD84,GSTO1,LILRB1,                      |
| 19 | TNIP3,SNRPC,CYTIP,GAR1,PLAC1,PDCD1,WDR76,FAR1,BIN2,BATF2,APOBEC3D,SCO2,CCNG1,EPSTI1,MANEA,SIRPB2,RASAL3,PIK3R2,E2F2,LARP1,THG1L,CAPRIN1,RDM1,TOBPB1,CDK5,TLE6,MINPP1,PIK3C2G,BTN3A3,RGS1,                     |
| 20 | TMEM161B,WDR77,XKRX,ODF3B,STT3A,CYTH1,SLC6A14,ZNF618,TRIM5,CD4,DDX47,ZNF280C,GLS2,PSTPIP1,SLC25A17,RIPK2,KEL,RPS27L,FOXRED2,RPS13,PRIM1,SNX4,CDCA4,XRN1,ZBTB32,TSFM,PPP2R4,FAM135A,CLEC4E,NACAP1,             |
| 21 | SIGLEC12,HIST1H2AL,SAMD10,DEF6,MATK,LYSMD2,DEAF1,43160,FRAT2,RPL23AP53,SIGLEC1,DOCK10,VPS13C,DMXL2,DDO,TMEM109,LSM6,FBXO5,DENND2D,PI4K2B,PRKD2,MR1,XRCC1,TNFRSF1B,ARNTL2,NR1H3,FBL,ATAD5,PCNXL3,ADAP2,        |
| 22 | ZNF543,PATL1,HK3,RELL1,ENC1,CLEC2D,SAMSN1,C11orf35,FCER1G,C12orf45,KCNA3,BIN3,POLD1,FIGN,SLC47A1,LST1,IKBKE,NOC3L,NEU3,ZWINT,PHF5A,NEK6,LCK,KCNJ10,ALAS1,FRMD5,NAA25,PARP14,FANCL,ACTR3B,                     |
| 23 | UMPS,MYO1F,TSPO2,SLAMF6,TAF1D,CDV3,RAN,LY9,RPL6,TOP1,PHACTR2,TIFA,SGMS1,PLK4,ACP5,CA13,CDT1,FMNL2,PRODH,RAPH1,LAIR1,TRIM16L,SGK1,FCHSD2,TRIM25,RNF213,MSH6,ASB9,PTPRCAP,APOL2,                                |
| 24 | SPTY2D1,GINS3,LAMP3,C3orf37,SAMD3,GM2A,ZNF831,CACHD1,CCDC125,PSMB8,ZNF223,HAUS5,KCNH3,USP43,NT5DC1,PION,RFC4,TRAF3IP3,CRISP3,STAT2,SLC35F2,DMKN,NCAPD3,ZNF259,NUB1,DTX2,FAM173A,ADCK2,IL7,PHC1,               |
| 25 | IL4I1,PRPF19,ZNF431,CNE2,DTX4,NCKAP1L,ATP13A4,ARSG,ALDH3B2,SAMD9L,STMN1,SCLY,LILRB5,SMC4,SELPLG,EIF3F,ACAP1,MBOAT1,OVOL2,MICB,TYROBP,DBR1,MEX3D,PIK3R3,DUS2L,HNRNPH1,OSBPL7,FANCA,HCST,UBA2,                  |
| 26 | PDE6G,TRNP1,IFI30,COMMD8,HMGB2,APOE,FMO3,MAT1A,MYO7A,C7orf31,PSME1,BRI3BP,SLAMF1,MLKL,HIST1H3B,COTL1,ZBTB39,CCDC104,PTMA,XRCC2,CHAF1A,C3AR1,RWDD2B,TGM2,MTHFD1,EIF2S2,ZNF581,MNX1,RGS19,P2RY10,               |
| 27 | PIK3R5,ZDHHC14,ZNF304,IL10RA,PARVG,FPR3,RFC5,RPS11,CYTH4,RFX3,LPXN,SEMA4D,ABCA12,MPZL2,RIF1,TFDP1,DHX58, CDC14B,TNFRSF17,AGPAT5,ZMYND15,GNPDA1,DIAPH1,RPS7,PDE12,MND1,TRAF3IP2,SIT1,LILRB2,SF3B5,             |
| 28 | RAD54L,TNFRSF4,NAA16,UBXN11,ZNF92,TOR3A,PSMA5,DDX6,PRKAR1B,CCR1,NAA50,DHX33,TMEM62,IFFO2,PML,FGD2,BTN3A1,SAT1,MPHOSPH9,PRKX,GAL3ST4,PILRA,TRAK1,FAM81A,FBXL19,XCL1,AKR1B1,APOL1,JAK3,DTNB,                    |
| 29 | PAQR6,DKK1,GPC4,CCDC34,CEP78,NCAPH2,RPL35,HLA–E,HEXIM2,SIGLEC9,CTSS,RAVER2,CDC7,GSTK1,MCM4,TNFSF8,DAG1,DDX26B,U2AF1,RBX1,43344,PHF15,CHIT1,RPL28,TAPBP,WDR90,PTK2B,BAAT,GMFG,LETMD1,                          |
| 30 | ARHGAP30,ESCO2,CCNO,IL27RA,PTPN7,MORC4,RALGPS1,ZNF485,MPDU1,LIMK2,C1QBP,GIMAP4,IRF4,CCL20,CISH,ZNF860,RAB11FIP3,CENPV,AVIL,SPI1,ZNF232,CASP7,PGAM5,HLA–G,MYO1G,ZNF239,SENP2,LRRC20,TNFRSF9,PRMT3,             |
| 31 | NACA,FERMT1,DOCK2,SEC14L1,FAM40B,ZBTB46,KLHL6,RPL41,NCOA3,PCDH7,TOR2A,FAM160A1,NAT10,TYMP,RASGRP3,TPRG1,AHCY,CSTF2,CD52,MAST4,SNRPD2,OSBPL10,ECT2,HCK,PIGL,OAS2,GBP2,DRAM1,C9orf64,TNS4,                      |
| 32 | C5orf58,FXYD5,SLC25A22,C20orf72,TMEM41A,FZD5,NMUR1,FAM57A,MTHFD2,ARHGAP25,PPIF,RPL27A,LMBR1,IL15,MAP3K1,CD300C,ELL2,TMEM30A,GZMK,TMEM33,CYLD,MIR155HG,CLEC2B,TTC19,PVT1,CDK12,ATP11B,TRAP1,RELT,LMNB2,        |
| 33 | SCGB1A1,ZNF90,HTT,CD53,PLEKHA7,CHD3,PGD,STON2,MYO19,DNMT1,SS18L2,MAZ,TMPRSS4,KIAA0020,ITGA4,MCCC2,LYN,RAB11FIP4,CCNC,ARHGAP15,RPS3A,ABCC4,POU2F3,ACSM3,TRAPPC4,NXT2,PAK1,DNASE1L3,FCRL5,PKMYT1,               |
| 34 | FAM113B,LYPD6,ANKRD22,CCT2,MEIS2,PIK3CG,ALKBH2,LYZ,SHMT2,MYBBP1A,TSC22D4,ADA,PIM2,RFX5,SH2D4A,TRAM1,APOBEC3C,ASF1B,IGFL2,ECHDC1,NCAPG2,HS3ST1,SDCCAG3,TNFAIP8,HMGN1,CCT8,TM7SF3,HIPK2,STEAP1,NEB,             |
| 35 | RAB8B,HNRNPF,GINS2,IKZF1,CD72,UCP2,DDAH1,NDOR1,LRRC61,C20orf118,GPR39,LTA,SSX2IP,CALM3,TNFSF10,P2RX3,C17orf58,FAM46C,BZW2,ERAP1,FAM49B,A4GNT,HIP1R,RNASEH2A,GALM,ATP2A2,MRPL23,HAUS6,CD48,PELI2,              |
| 36 | MCM6,UHRF1,PPP3CC,SAMD1,RAD51,ZNF69,LAPTM5,GLCCI1,COASY,DTL,OSBPL3,CD40LG,HDAC9,ARAP2,HSPH1,FMO2,CERKL,HEXDC,NEURL3,WDR45L,MLF1IP,RARG,CCDC28B,UTF3C6,MPEG1,IGSF9B,CD7,TMEM48,TREM2,SASH3,                    |
| 37 | NPC2,AP1S1,MGST2,ZMAT3,SMAGP,SPINK5,KRT13,B9D2,POLB,HCLS1,TEAD4,HIST1H1E,MARS2,IRF8,PA2G4,NUP205,NDUFB6,GSDMD,BCYRN1,SERPINB1,PSMC4,MSR1,STEAP2,C14orf80,ZNF518A,RBL1,CXorf21,FGFR1OP,RP L26L1,DLGAP5,        |
| 38 | OTX1,BRCA2,WAS,POLA1,GRHL1,NSA2,PTPRC,PPP1R16B,C17orf53,NUDT12,ITGB2,HLA–F,PLLP,SNORA76,SAAL1,KALRN,HLA–C,CST7,PLD3,PRRG4,MSH2,IGF2BP2,LILRB3,KITLG,UBASH3B,FBXL14,KIF18B,HCP5,TIMELESS,UGCG,                 |
| 39 | FLVCR1,KIF11,UGT8, RTP4,TIPIN,CCDC138,RPS15,GNA15,IQGAP3,SPATA20,GIMAP7,FRMD4B,                                                                                                                               |

## Supporting Material 7A:methylation correlated genes (meSCGs)

**Page 1**

**Page 2**

**Page 3**

**Page 4**

**Page 5**

**Page 6**

**Page 7**

**Page 8**

**Page 9**

**Page 10**

**Page 11**

**Page 12**

**Page 13**

**Page 14**

**Page 15**

**Page 16**

**Page 17**

**Page 18**

**Page 19**

**Page 20**

**Page 21**

**Page 22**

**Page 23**

**Page 24**

**Page 25**

**Page 26**

**Page 27**

**Page 28**

**Page 29**

**Page 30**

**Page 31**

**Page 32**

**Page 33**

**Page 34**

**Page 35**

**Page 36**

**Page 37**

**Page 38**

**Page 39**

**Page 40**

**Page 41**

**Page 42**

**Page 43**

**Page 44**

**Page 45**

**Page 46**

**Page 47**

**Page 48**

**Page 49**

**Page 50**

**Page 51**

**Page 52**

**Page 53**

**Page 54**

**Page 55**

**Page 56**

**Page 57**

**Page 58**

**Page 59**

**Page 60**

**Page 61**

**Page 62**

**Page 63**

**Page 64**

**Page 65**

**Page 66**

**Page 67**

**Page 68**

**Page 69**

**Page 70**

**Page 71**

**Page 72**

**Page 73**

**Page 74**

**Page 75**

**Page 76**

**Page 77**

**Page 78**

**Page 79**

**Page 80**

**Page 81**

**Page 82**

**Page 83**

**Page 84**

**Page 85**

**Page 86**

**Page 87**

**Page 88**

**Page 89**

**Page 90**

**Page 91**

**Page 92**

**Page 93**

**Page 94**

**Page 95**

**Page 96**

**Page 97**

**Page 98**

**Page 99**

**Page 100**

**Page 101**

**Page 102**

**Page 103**

**Page 104**

**Page 105**

**Page 106**

**Page 107**

**Page 108**

**Page 109**

**Page 110**

**Page 111**

**Page 112**

**Page 113**

**Page 114**

**Page 115**

**Page 116**

**Page 117**

**Page 118**

**Page 119**

**Page 120**

**Page 121**

**Page 122**

**Page 123**

**Page 124**

**Page 125**

**Page 126**

**Page 127**

**Page 128**

**Page 129**

**Page 130**

**Page 131**

**Page 132**

**Page 133**

**Page 134**

**Page 135**

**Page 136**

**Page 137**

**Page 138**

**Page 139**

**Page 140**

**Page 141**

**Page 142**

**Page 143**

**Page 144**

**Page 145**

**Page 146**

**Page 147**

**Page 148**

**Page 149**

**Page 150**

**Page 151**

**Page 152**

**Page 153**

**Page 154**

**Page 155**

**Page 156**

**Page 157**

**Page 158**

**Page 159**

**Page 160**

**Page 161**

**Page 162**

**Page 163**

**Page 164**

**Page 165**

**Page 166**

**Page 167**

**Page 168**

**Page 169**

**Page 170**

**Page 171**

**Page 172**

**Page 173**

**Page 174**

**Page 175**

**Page 176**

**Page 177**

**Page 178**

**Page 179**

**Page 180**

**Page 181**

**Page 182**

**Page 183**

**Page 184**

**Page 185**

**Page 186**

**Page 187**

**Page 188**

**Page 189**

**Page 190**

**Page 191**

**Page 192**

**Page 193**

**Page 194**

**Page 195**

**Page 196**

**Page 197**

**Page 198**

**Page 199**

**Page 200**

**Page 201**

**Page 202**

**Page 203**

**Page 204**

**Page 205**

**Page 206**

**Page 207**

**Page 208**

**Page 209**

**Page 210**

**Page 211**

**Page 212**

**Page 213**

**Page 214**

**Page 215**

**Page 216**

**Page 217**

**Page 218**

**Page 219**

**Page 220**

**Page 221**

**Page 222**

**Page 223**

**Page 224**

**Page 225**

**Page 226**

**Page 227**

**Page 228**

**Page 229**

**Page 230**

**Page 231**

**Page 232**

**Page 233**

**Page 234**

**Page 235**

**Page 236**

**Page 237**

**Page 238**

**Page 239**

**Page 240**

**Page 241**

**Page 242**

**Page 243**

**Page 244**

**Page 245**

**Page 246**

**Page 247**

**Page 248**

**Page 249**

**Page 250**

**Page 251**

**Page 252**

**Page 253**

**Page 254**

**Page 255**

**Page 256**

**Page 257**

**Page 258**

**Page 259**

**Page 260**

**Page 261**

**Page 262**

**Page 263**

**Page 264**

**Page 265**

**Page 266**

**Page 267**

**Page 268**

**Page 269**

**Page 270**

**Page 271**

**Page 272**

**Page 273**

**Page 274**

**Page 275**

**Page 276**

**Page 277**

**Page 278**

**Page 279**

**Page 280**

**Page 281**

**Page 282**

**Page 283**

**Page 284**

**Page 285**

**Page 286**

**Page 287**

**Page 288**

**Page 289**

**Page 290**

**Page 291**

**Page 292**

**Page 293**

**Page 294**

**Page 295**

**Page 296**

**Page 297**

**Page 298**

**Page 299**

Supporting Material 7B: MSigDB signatures enriched in meSCGs

|    | set1_Name | set2_Name                                                                         | Background | set1_size | set2_size | expected.overlap | actual.overlap | enrichment.foldchange | odds_ratio          | FET_pvalue   | corrected.FET.pvalue |
|----|-----------|-----------------------------------------------------------------------------------|------------|-----------|-----------|------------------|----------------|-----------------------|---------------------|--------------|----------------------|
| 1  | cls_NEG   | SIGNAL_TRANSDUCTION                                                               | 26538      | 4004      | 1612      | 243.21531        | 452            | 1.858436              | 2.344592535341699   | 2.092710e-43 | 6.905943e-40         |
| 2  | cls_NEG   | MEMBRANE                                                                          | 26538      | 4004      | 1947      | 293.75944        | 512            | 1.742923              | 2.1557128575142999  | 9.264462e-41 | 8.634478e-38         |
| 3  | cls_NEG   | PLASMA_MEMBRANE                                                                   | 26538      | 4004      | 1389      | 209.56952        | 396            | 1.889588              | 2.3808186883784801  | 1.033535e-39 | 9.632547e-37         |
| 4  | trans_NEG | HALLMARK_E2F_TARGETS                                                              | 26538      | 8266      | 198       | 61.67262         | 147            | 2.383554              | 6.4679994705948802  | 8.533025e-36 | 1.706605e-33         |
| 5  | trans_POS | HALLMARK_E2F_TARGETS                                                              | 26538      | 7352      | 198       | 84.85327         | 139            | 2.534033              | 6.2480032285349001  | 1.440063e-35 | 2.880126e-33         |
| 6  | cls_NEG   | HALLMARK_ALLOGRAFT_REJECTION                                                      | 26538      | 4004      | 196       | 29.57209         | 103            | 3.483014              | 6.37049006676334    | 1.475272e-34 | 2.805544e-32         |
| 7  | cls_NEG   | PLASMA_MEMBRANE_PART                                                              | 26538      | 4004      | 1127      | 170.03849        | 325            | 1.911321              | 2.3936416370505098  | 1.394435e-33 | 1.299613e-30         |
| 8  | cls_NEG   | MEMBRANE_PART                                                                     | 26538      | 4004      | 1630      | 245.93112        | 426            | 1.732192              | 2.1082139904171399  | 4.496690e-33 | 4.190915e-30         |
| 9  | trans_NEG | PLASMA_MEMBRANE                                                                   | 26538      | 8266      | 1389      | 432.84278        | 631            | 1.458478              | 1.9096001439513199  | 1.497114e-30 | 1.395310e-27         |
| 10 | trans_NEG | MEMBRANE                                                                          | 26538      | 8266      | 1947      | 606.44743        | 837            | 1.380169              | 1.7418487092003201  | 2.005608e-30 | 1.869227e-27         |
| 11 | trans_NEG | SIGNAL_TRANSDUCTION                                                               | 26538      | 8266      | 1612      | 502.10234        | 706            | 1.408088              | 1.7898671449213901  | 2.214695e-28 | 7.308408e-25         |
| 12 | trans_NEG | RB_P107_DN.V1_UP                                                                  | 26538      | 8266      | 138       | 42.98395         | 106            | 2.469537              | 7.4036982171184897  | 2.447140e-28 | 1.850038e-25         |
| 13 | cls_NEG   | HALLMARK_INTERFERON_GAMMA_RESPONSE                                                | 26538      | 4004      | 197       | 29.72296         | 95             | 3.198182              | 5.3442926977870302  | 3.510299e-28 | 7.020599e-26         |
| 14 | trans_POS | HALLMARK_ALLOGRAFT_REJECTION                                                      | 26538      | 7352      | 196       | 54.29919         | 128            | 2.357309              | 4.9812340428831101  | 4.621172e-28 | 9.242344e-26         |
| 15 | trans_NEG | HALLMARK_EPITHELIAL_MESENCHYMAL_TRANSITION                                        | 26538      | 8266      | 199       | 61.98410         | 137            | 2.210244              | 4.948647844888899   | 6.775337e-28 | 1.355067e-25         |
| 16 | cls_POS   | MEMBRANE                                                                          | 26538      | 1529      | 1947      | 112.17737        | 231            | 2.059239              | 2.4156028668402301  | 6.093737e-27 | 5.625900e-24         |
| 17 | cls_NEG   | PS3_DN.V1_UP                                                                      | 26538      | 4004      | 191       | 28.81770         | 91             | 3.157782              | 5.21681262950534    | 1.456378e-26 | 1.101022e-23         |
| 18 | cls_POS   | PLASMA_MEMBRANE                                                                   | 26538      | 1529      | 1389      | 80.02792         | 183            | 2.288702              | 2.6831504643794801  | 1.512530e-26 | 1.409678e-23         |
| 19 | cls_NEG   | INTEGRAL_TO_MEMBRANE                                                              | 26538      | 4004      | 1294      | 195.23611        | 338            | 1.731237              | 2.0809729484170498  | 3.475253e-26 | 3.288036e-23         |
| 20 | trans_NEG | HALLMARK_ALLOGRAFT_REJECTION                                                      | 26538      | 8266      | 196       | 61.04966         | 133            | 2.178554              | 4.78268681869607    | 3.590731e-26 | 7.183461e-24         |
| 21 | cls_NEG   | IMMUNE_SYSTEM_PROCESS                                                             | 26538      | 4004      | 321       | 48.43183         | 125            | 2.580947              | 3.67242015602445    | 1.044248e-25 | 3.446138e-22         |
| 22 | trans_NEG | IMMUNE_SYSTEM_PROCESS                                                             | 26538      | 8266      | 321       | 99.98400         | 190            | 1.900296              | 3.25784844538781    | 1.923727e-25 | 6.348301e-22         |
| 23 | trans_POS | REACTOME_CELL_CYCLE                                                               | 26538      | 7352      | 393       | 108.87542        | 206            | 1.892071              | 2.92868571730925    | 2.087282e-25 | 5.627313e-22         |
| 24 | cls_NEG   | INTRINSIC_TO_MEMBRANE                                                             | 26538      | 4004      | 1312      | 197.95192        | 339            | 1.712537              | 2.04961730583979    | 2.269534e-25 | 2.112409e-22         |
| 25 | trans_POS | RB_P107_DN.V1_UP                                                                  | 26538      | 7352      | 138       | 38.23106         | 97             | 2.537204              | 6.2415994464597804  | 2.611354e-25 | 1.974184e-22         |
| 26 | trans_POS | IMMUNE_SYSTEM_PROCESS                                                             | 26538      | 7352      | 321       | 88.92878         | 176            | 1.979112              | 3.2205343707150198  | 8.660881e-25 | 2.858124e-21         |
| 27 | trans_NEG | PLASMA_MEMBRANE_PART                                                              | 26538      | 8266      | 1127      | 351.03557        | 510            | 1.452844              | 1.88158216866407    | 2.512184e-24 | 2.341355e-21         |
| 28 | cls_POS   | ANATOMICAL_STRUCTURE_DEVELOPMENT                                                  | 26538      | 1529      | 993       | 57.21219         | 142            | 2.481989              | 2.9061336466287702  | 4.496449e-24 | 1.483828e-20         |
| 29 | cls_POS   | MULTICELLULAR_ORGANISMAL_DEVELOPMENT                                              | 26538      | 1529      | 1029      | 59.28634         | 145            | 2.445757              | 2.8593090022510101  | 6.218746e-24 | 2.052186e-20         |
| 30 | cls_NEG   | LEFT_UP.V1_DN                                                                     | 26538      | 4004      | 184       | 27.76155         | 85             | 3.061789              | 4.9148213882871502  | 9.308673e-24 | 7.037357e-21         |
| 31 | cls_NEG   | ANATOMICAL_STRUCTURE_DEVELOPMENT                                                  | 26538      | 4004      | 993       | 149.82184        | 270            | 1.802140              | 2.1812805868965     | 9.645281e-24 | 3.183933e-20         |
| 32 | cls_NEG   | INTEGRAL_TO_PLASMA_MEMBRANE                                                       | 26538      | 4004      | 946       | 142.73058        | 260            | 1.821614              | 2.21161291785464    | 1.306556e-23 | 1.212127e-20         |
| 33 | cls_NEG   | HALLMARK_ESTROGEN_RESPONSE_LATE                                                   | 26538      | 4004      | 199       | 30.02472         | 89             | 2.964224              | 4.6340523863645204  | 1.395820e-23 | 2.791658e-21         |
| 34 | cls_NEG   | REACTOME_IMMUNE_SYSTEM                                                            | 26538      | 4004      | 876       | 132.18912        | 245            | 1.853686              | 2.26230454545472401 | 2.021012e-23 | 5.448648e-20         |
| 35 | trans_POS | HALLMARK_G2M_CHECKPOINT                                                           | 26538      | 7352      | 199       | 55.13000         | 122            | 2.212399              | 4.1873283213445296  | 3.280139e-23 | 6.560278e-21         |
| 36 | trans_NEG | MEMBRANE_PART                                                                     | 26538      | 8266      | 1630      | 507.70985        | 691            | 1.361016              | 1.68362930981122    | 3.551244e-23 | 3.309760e-20         |
| 37 | cls_POS   | MEMBRANE_PART                                                                     | 26538      | 1529      | 1630      | 93.91326         | 195            | 2.076384              | 2.40128621142698    | 4.110168e-23 | 3.830676e-20         |
| 38 | cls_NEG   | INTRINSIC_TO_PLASMA_MEMBRANE                                                      | 26538      | 4004      | 960       | 144.84287        | 281            | 1.801953              | 2.1781191183092199  | 5.703422e-23 | 5.310589e-20         |
| 39 | cls_POS   | SYSTEM_DEVELOPMENT                                                                | 26538      | 1529      | 843       | 48.59986         | 125            | 2.573612              | 3.01185692758306    | 1.196136e-22 | 3.947248e-19         |
| 40 | cls_NEG   | HALLMARK_ESTROGEN_RESPONSE_EARLY                                                  | 26538      | 4004      | 198       | 29.87384         | 87             | 2.912247              | 4.4866656200402602  | 1.922477e-22 | 3.844943e-20         |
| 41 | trans_NEG | INTEGRAL_TO_MEMBRANE                                                              | 26538      | 8266      | 1294      | 403.05238        | 565            | 1.401803              | 1.76541585047981    | 2.004582e-22 | 1.868271e-19         |
| 42 | cls_NEG   | IMMUNE_RESPONSE                                                                   | 26538      | 4004      | 227       | 34.24930         | 94             | 2.744581              | 4.0480045845801301  | 6.916444e-22 | 2.282427e-18         |
| 43 | cls_NEG   | MULTICELLULAR_ORGANISMAL_DEVELOPMENT                                              | 26538      | 4004      | 1029      | 155.25345        | 271            | 1.745533              | 2.08549552508088    | 1.163371e-21 | 3.839126e-18         |
| 44 | cls_NEG   | BIOPOLYMER_METABOLIC_PROCESS                                                      | 26538      | 4004      | 1660      | 250.45746        | 393            | 1.569129              | 1.8267030628711101  | 1.245150e-21 | 4.108996e-18         |
| 45 | trans_NEG | INTRINSIC_TO_MEMBRANE                                                             | 26538      | 8266      | 1312      | 408.65898        | 568            | 1.389912              | 1.7382088031310099  | 1.557172e-21 | 1.451243e-18         |
| 46 | cls_NEG   | PS3_DN.V1_DN                                                                      | 26538      | 4004      | 189       | 28.51594         | 83             | 2.910653              | 4.4787160217004702  | 1.855134e-21 | 1.402482e-18         |
| 47 | trans_NEG | IMMUNE_RESPONSE                                                                   | 26538      | 8266      | 227       | 70.70548         | 140            | 1.980045              | 3.6008970891399388  | 1.962308e-21 | 6.475618e-18         |
| 48 | cls_POS   | PLASMA_MEMBRANE_PART                                                              | 26538      | 1529      | 1127      | 64.93266         | 147            | 2.263884              | 2.6578738907482202  | 5.756293e-21 | 5.364856e-18         |
| 49 | trans_NEG | HALLMARK_G2M_CHECKPOINT                                                           | 26538      | 8266      | 199       | 61.98410         | 126            | 2.032779              | 3.8585959325326002  | 7.636373e-21 | 1.527675e-18         |
| 50 | trans_POS | REACTOME_DNA_REPLICATION                                                          | 26538      | 7352      | 185       | 51.25179         | 112            | 2.185290              | 4.0500045498808199  | 8.320941e-21 | 2.249433e-17         |
| 51 | trans_NEG | HALLMARK_INTERFERON_GAMMA_RESPONSE                                                | 26538      | 8266      | 197       | 61.36114         | 125            | 2.037120              | 3.88084013170677    | 8.333130e-21 | 1.666626e-18         |
| 52 | trans_POS | REACTOME_CELL_CYCLE_MITOTIC                                                       | 26538      | 7352      | 304       | 84.21916         | 161            | 1.911679              | 2.9813637808380502  | 9.528498e-21 | 2.568882e-17         |
| 53 | cls_NEG   | REACTOME_HEMOSTASIS                                                               | 26538      | 4004      | 446       | 67.29156         | 145            | 2.154801              | 2.77533447777834    | 1.219997e-20 | 3.289111e-17         |
| 54 | cls_NEG   | MEK_UP.V1_UP                                                                      | 26538      | 4004      | 194       | 29.27033         | 83             | 2.835636              | 4.2760454175732399  | 1.424844e-20 | 1.077182e-17         |
| 55 | cls_NEG   | SYSTEM_DEVELOPMENT                                                                | 26538      | 4004      | 843       | 127.19014        | 230            | 1.808316              | 2.1782696600536202  | 1.466609e-20 | 4.839810e-17         |
| 56 | trans_POS | PLASMA_MEMBRANE                                                                   | 26538      | 7352      | 1389      | 384.80398        | 539            | 1.400713              | 1.708550083252525   | 2.307452e-20 | 2.150545e-17         |
| 57 | trans_NEG | INTEGRAL_TO_PLASMA_MEMBRANE                                                       | 26538      | 8266      | 946       | 294.65806        | 427            | 1.449137              | 1.8632940033220001  | 2.900490e-20 | 2.703257e-17         |
| 58 | trans_NEG | KEGG_CELL_ADHESION_MOLECULES_CAMS                                                 | 26538      | 8266      | 128       | 39.86917         | 90             | 2.257383              | 5.2813178527809903  | 8.700721e-20 | 6.473337e-17         |
| 59 | cls_NEG   | KEGG_CELL_ADHESION_MOLECULES_CAMS                                                 | 26538      | 4004      | 128       | 19.31238         | 63             | 3.262156              | 5.5254300675491804  | 8.415016e-20 | 7.004772e-17         |
| 60 | trans_NEG | INTRINSIC_TO_PLASMA_MEMBRANE                                                      | 26538      | 8266      | 960       | 299.01877        | 430            | 1.438037              | 1.83701339444533    | 1.181203e-19 | 1.100881e-16         |
| 61 | trans_NEG | REACTOME_CELL_CYCLE_MITOTIC                                                       | 26538      | 8266      | 304       | 94.68928         | 170            | 1.795346              | 2.8421314106753801  | 2.408017e-19 | 6.492013e-16         |
| 62 | trans_POS | IMMUNE_RESPONSE                                                                   | 26538      | 7352      | 227       | 62.88733         | 127            | 2.019485              | 3.3545827400929902  | 2.880662e-19 | 9.506185e-16         |
| 63 | trans_NEG | REACTOME_CELL_CYCLE                                                               | 26538      | 8266      | 393       | 122.41081        | 207            | 1.691027              | 2.49749223374618    | 4.017154e-19 | 1.083025e-15         |
| 64 | trans_POS | SIGNAL_TRANSDUCTION                                                               | 26538      | 7352      | 1612      | 446.58316        | 605            | 1.354731              | 1.61873776318075    | 5.893130e-19 | 1.844733e-15         |
| 65 | trans_NEG | REACTOME_DNA_REPLICATION                                                          | 26538      | 8266      | 185       | 57.62341         | 116            | 2.013071              | 3.75459583919845    | 8.096624e-19 | 2.182850e-15         |
| 66 | cls_NEG   | POSITIVE_REGULATION_OF_BIOLOGICAL_PROCESS                                         | 26538      | 4004      | 693       | 104.55844        | 194            | 1.855422              | 2.24839471760454    | 8.198120e-19 | 2.705379e-15         |
| 67 | cls_POS   | INTRINSIC_TO_MEMBRANE                                                             | 26538      | 1529      | 1312      | 75.59153         | 157            | 2.078952              | 2.363225260858302   | 1.118260e-18 | 1.039605e-15         |
| 68 | cls_POS   | NERVOUS_SYSTEM_DEVELOPMENT                                                        | 26538      | 1529      | 372       | 21.43296         | 70             | 3.265997              | 3.9251038301655701  | 1.177733e-18 | 3.886518e-15         |
| 69 | cls_POS   | LEFT_UP.V1_UP                                                                     | 26538      | 1529      | 189       | 10.88933         | 48             | 4.407985              | 5.7154195496853496  | 1.213478e-18 | 9.173896e-16         |
| 70 | cls_NEG   | INTRACELLULAR_SIGNALING_CASCADE                                                   | 26538      | 4004      | 657       | 99.12684         | 186            | 1.878384              | 2.2819357324991199  | 1.214953e-18 | 4.009344e-15         |
| 71 | cls_POS   | INTEGRAL_TO_MEMBRANE                                                              | 26538      | 1529      | 1284      | 74.55445         | 155            | 2.078017              | 2.3640354691724101  | 1.728313e-18 | 1.610788e-15         |
| 72 | cls_POS   | ERB2_UP.V1_UP                                                                     | 26538      | 4004      | 188       | 28.36506         | 78             | 2.749862              | 4.0499118767744999  | 1.821540e-18 | 1.377085e-15         |
| 73 | trans_NEG | CELL_PROLIFERATION_G0_008283                                                      | 26538      | 8266      | 504       | 156.98485        | 250            | 1.582510              | 2.2123186927633398  | 2.379812e-18 | 7.853378e-15         |
| 74 | cls_NEG   | REGULATION_OF_DEVELOPMENTAL_PROCESS                                               | 26538      | 4004      | 431       | 65.02841         | 136            | 2.091394              | 2.6503740749553399  | 3.440860e-18 | 1.135484e-14         |
| 75 | trans_NEG | REACTOME_IMMUNOREGULATORY_INTERACTIONS_BETWEEN_A_LYMPHOID_AND_A_NON_LYMPHOID_CELL | 26538      | 8266      | 58        | 18.06572         | 50             | 2.767673              | 13.894532498007999  | 4.473293e-18 | 1.290000e-14         |
| 76 | cls_NEG   | NEGATIVE_REGULATION_OF_BIOLOGICAL_PROCESS                                         | 26538      | 4004      | 685       | 100.33386        | 196            | 1.853811              | 2.2430138991184401  | 4.816713e-18 | 1.589515e-14         |
| 77 | cls_NEG   | RAF_UP.V1_DN                                                                      | 26538      | 4004      | 191       | 28.81770         | 78             | 2.708670              | 3.94183679475986    | 5.520071e-18 | 4.179978e-15         |
| 78 | cls_NEG   | ORGAN_DEVELOPMENT                                                                 | 26538      | 4004      | 567       | 85.54782         | 165            | 1.928748              | 2.3659852088603799  | 6.493073e-18 | 2.142714e-14         |
| 79 | cls_NEG   | POSITIVE_REGULATION_OF_CELLULAR_PROCESS                                           | 26538      | 4004      | 654       | 98.67420         | 183            | 1.854588              | 2.24337008777705    | 8.596986e-18 | 2.833705e-14         |
| 80 | trans_POS | REACTOME_MITOTIC_M_M_G1_PHASES                                                    | 26538      | 7352      | 165       | 45.71106         | 98             | 2.143901              | 3.8548835302790598  | 1.395761e-17 | 3.762970e-14         |
| 81 | trans_POS | HALLMARK_EPITHELIAL_MESENCHYMAL_TRANSITION                                        | 26538      | 7352      | 199       | 55.13030         | 112            | 2.031551              | 3.3956258441544298  | 2.002771e-17 | 4.005041e-15         |
| 82 | trans_NEG | REACTOME_IMMUNE_SYSTEM                                                            | 26538      | 8266      | 876       | 272.85462        | 390            | 1.429333              | 1.8120341715586401  | 2.095790e-17 | 5.650250e-14         |
| 83 | cls_NEG   | STK33_NOMO_DN                                                                     | 26538      | 400       |           |                  |                |                       |                     |              |                      |

|    | set1_Name | set2_Name                                                                         | Background | set1_size | set2_size | expected_overlap | actual_overlap | enrichment_foldchange | odds_ratio         | FET_pvalue   | corrected_FET_pvalue |
|----|-----------|-----------------------------------------------------------------------------------|------------|-----------|-----------|------------------|----------------|-----------------------|--------------------|--------------|----------------------|
| 1  | trans_NEG | REACTOME_ADAPTIVE_IMMUNE_SYSTEM                                                   | 26538      | 8266      | 503       | 156.67337        | 243            | 1.550997              | 2.0682400351426902 | 3.960473e-16 | 1.067744e-12         |
| 2  | trans_NEG | REACTOME_MITOTIC_M_M_G1_PHASES                                                    | 26538      | 8266      | 165       | 51.39385         | 102            | 1.984673              | 3.610776958680101  | 4.110326e-16 | 1.108144e-12         |
| 3  | cis_NEG   | TRANSCRIPTION                                                                     | 26538      | 4004      | 743       | 112.10234        | 196            | 1.748402              | 2.068484045277301  | 4.863946e-16 | 1.611703e-12         |
| 4  | trans_POS | PLASMA_MEMBRANE_PART                                                              | 26538      | 7352      | 1127      | 312.22036        | 434            | 1.380344              | 1.6740712803968201 | 6.349125e-16 | 5.917364e-13         |
| 5  | trans_POS | KEGG_CELL_ADHESION_MOLECULES_CAMS                                                 | 26538      | 7352      | 128       | 35.46070         | 79             | 2.227919              | 4.241889525296701  | 8.816687e-16 | 6.559615e-13         |
| 6  | trans_NEG | CELL_CYCLE_PROCESS                                                                | 26538      | 8266      | 193       | 60.11523         | 114            | 1.896308              | 3.22030053614175   | 9.495322e-16 | 3.105076e-12         |
| 7  | cis_NEG   | HALLMARK_EPITHELIAL_MESENCHYMAL_TRANSITION                                        | 26538      | 4004      | 199       | 30.02472         | 78             | 2.531248              | 3.52590474569385   | 1.211830e-15 | 2.423660e-13         |
| 8  | cis_NEG   | REACTOME_GENERIC_TRANSCRIPTION_PATHWAY                                            | 26538      | 4004      | 338       | 50.99676         | 109            | 2.137391              | 2.725832737808699  | 1.393169e-15 | 3.755984e-12         |
| 9  | trans_POS | CELL_CYCLE_PROCESS                                                                | 26538      | 7352      | 193       | 53.46808         | 106            | 1.982491              | 3.2112668564770801 | 1.419074e-15 | 4.682943e-12         |
| 10 | cis_NEG   | UTE2_UP_V1_UP                                                                     | 26538      | 4004      | 184       | 27.79155         | 72             | 2.593515              | 3.6656294715276698 | 1.525199e-15 | 1.153050e-12         |
| 11 | cis_POS   | INTRINSIC_TO_PLASMA_MEMBRANE                                                      | 26538      | 1529      | 960       | 55.31087         | 119            | 2.151476              | 2.4251446123306901 | 1.814467e-15 | 1.691082e-12         |
| 12 | cis_NEG   | STK33_DN                                                                          | 26538      | 4004      | 271       | 40.88793         | 93             | 2.274510              | 2.9863754568861    | 2.339654e-15 | 1.768778e-12         |
| 13 | cis_NEG   | APOPTOSIS_GO                                                                      | 26538      | 4004      | 422       | 63.67051         | 127            | 1.994644              | 2.4694883663282998 | 2.662489e-15 | 8.786213e-12         |
| 14 | trans_POS | AKT_UP_V1_DN                                                                      | 26538      | 7352      | 187       | 51.80566         | 103            | 1.988192              | 3.2308893973385901 | 2.748921e-15 | 2.078184e-12         |
| 15 | cis_NEG   | EGFR_UP_V1_UP                                                                     | 26538      | 4004      | 190       | 28.66682         | 73             | 2.546498              | 3.55762085705667   | 3.036436e-15 | 2.295546e-12         |
| 16 | cis_NEG   | PROGRAMMED_CELL_DEATH                                                             | 26538      | 4004      | 423       | 63.82139         | 127            | 1.989929              | 2.4607273052180898 | 3.247326e-15 | 1.076196e-11         |
| 17 | trans_NEG | CELL_CYCLE_GO_0007049                                                             | 26538      | 8266      | 313       | 97.49256         | 164            | 1.682179              | 2.4619630199870701 | 3.523366e-15 | 1.162710e-11         |
| 18 | cis_POS   | INTEGRAL_TO_PLASMA_MEMBRANE                                                       | 26538      | 1529      | 946       | 54.50426         | 117            | 2.148621              | 2.4166445412262698 | 3.734880e-15 | 3.480930e-12         |
| 19 | cis_NEG   | KEGG_PATHWAYS_H_CANCER                                                            | 26538      | 4004      | 325       | 49.03535         | 105            | 2.141313              | 2.7315086996120699 | 4.014414e-15 | 2.986724e-12         |
| 20 | trans_NEG | DEFENSE_RESPONSE                                                                  | 26538      | 8266      | 256       | 79.73834         | 140            | 1.755743              | 2.6964726338817702 | 4.092977e-15 | 1.300682e-11         |
| 21 | cis_NEG   | HALLMARK_MYOGENESIS                                                               | 26538      | 4004      | 199       | 30.02472         | 75             | 2.497942              | 3.4462650385449501 | 4.271743e-15 | 8.543486e-13         |
| 22 | trans_NEG | RECEPTOR_ACTIVITY                                                                 | 26538      | 8266      | 569       | 177.23091        | 265            | 1.495224              | 1.95763681911309   | 5.324251e-15 | 8.433614e-12         |
| 23 | cis_NEG   | HALLMARK_INFLAMMATORY_RESPONSE                                                    | 26538      | 4004      | 200       | 30.17560         | 75             | 2.485462              | 3.4218765357289798 | 5.833822e-15 | 1.166764e-12         |
| 24 | trans_NEG | HALLMARK_RAS_SIGNALING_UP                                                         | 26538      | 8266      | 199       | 61.98410         | 115            | 1.855315              | 3.0547251813377101 | 6.326978e-15 | 1.265396e-12         |
| 25 | cis_NEG   | PROTEIN_KINASE_CASCADE                                                            | 26538      | 4004      | 289       | 43.60374         | 96             | 2.201646              | 2.8343036055148    | 8.628606e-15 | 2.847458e-11         |
| 26 | cis_NEG   | RNA_BIOSYNTHETIC_PROCESS                                                          | 26538      | 4004      | 629       | 94.90225         | 169            | 1.793780              | 2.11462077520281   | 9.101695e-15 | 3.003560e-11         |
| 27 | trans_POS | HALLMARK_INTERFERON_GAMMA_RESPONSE                                                | 26538      | 7352      | 197       | 54.57623         | 106            | 1.942237              | 3.0682363437330998 | 9.108956e-15 | 1.821791e-12         |
| 28 | trans_POS | LYMPHOCYTE_ACTIVATION                                                             | 26538      | 7352      | 59        | 18.34517         | 45             | 2.753108              | 8.4324654612013603 | 1.218575e-14 | 4.021297e-11         |
| 29 | cis_NEG   | TRANSCRIPTION_DNA_DEPENDENT                                                       | 26538      | 4004      | 627       | 94.00050         | 168            | 1.775889              | 2.1062366312715999 | 1.424890e-14 | 4.702335e-11         |
| 30 | trans_NEG | INTRACELLULAR_SIGNALING_CASCADE                                                   | 26538      | 8266      | 657       | 204.64067        | 297            | 1.451322              | 1.8544071150016199 | 1.445040e-14 | 4.769649e-11         |
| 31 | trans_NEG | RPS14_DN_V1_UP                                                                    | 26538      | 8266      | 188       | 58.55784         | 109            | 1.861407              | 3.0771782540463999 | 2.342930e-14 | 1.771028e-11         |
| 32 | cis_NEG   | PROTEIN_METABOLIC_PROCESS                                                         | 26538      | 4004      | 1206      | 181.95685        | 279            | 1.533314              | 1.7457468576609501 | 2.945641e-14 | 9.720617e-11         |
| 33 | trans_POS | REACTOME_IMMUNOREGULATORY_INTERACTIONS_BETWEEN_A_LYMPHOID_AND_A_NON_LYMPHOID_CELL | 26538      | 7352      | 58        | 16.06813         | 44             | 2.738340              | 8.243915235050103  | 3.377316e-14 | 9.105245e-11         |
| 34 | cis_NEG   | KEGG_CHEMOKINE_SIGNALING_PATHWAY                                                  | 26538      | 4004      | 186       | 28.06331         | 70             | 2.494360              | 3.4385475057288698 | 3.799398e-14 | 2.797394e-11         |
| 35 | cis_NEG   | NUCLEOBASENUCLEOSIDENUCLEOTIDE_AND_NUCLEIC_ACID_METABOLIC_PROCESS                 | 26538      | 4004      | 1228      | 184.97641        | 282            | 1.524519              | 1.7327747327145    | 4.427661e-14 | 1.461128e-10         |
| 36 | cis_NEG   | CYTOSOLASM                                                                        | 26538      | 4004      | 2087      | 314.88236        | 437            | 1.387820              | 1.5059980758715101 | 5.250732e-14 | 4.893682e-11         |
| 37 | trans_NEG | SNF5_DN_V1_UP                                                                     | 26538      | 8266      | 174       | 54.19715         | 102            | 1.882018              | 3.15892549817913   | 9.932733e-14 | 4.485146e-11         |
| 38 | cis_NEG   | ESC_V6.5_UP_EARLY_V1_DN                                                           | 26538      | 4004      | 169       | 25.49638         | 65             | 2.549182              | 3.5587369322920002 | 9.258786e-14 | 6.999642e-11         |
| 39 | cis_POS   | SIGNAL_TRANSDUCTION                                                               | 26538      | 1529      | 1612      | 92.87616         | 166            | 1.797326              | 1.9845465866069999 | 1.201603e-13 | 3.965289e-10         |
| 40 | trans_NEG | POSITIVE_REGULATION_OF_BIOLOGICAL_PROCESS                                         | 26538      | 8266      | 693       | 215.85417        | 307            | 1.422257              | 1.78720364398675   | 1.224335e-13 | 4.040307e-10         |
| 41 | cis_NEG   | BM1_DN_V1_UP                                                                      | 26538      | 4004      | 143       | 21.57555         | 58             | 2.688228              | 3.881727005601001  | 1.350767e-13 | 1.021180e-10         |
| 42 | trans_POS | E2F3_UP_V1_UP                                                                     | 26538      | 7352      | 183       | 50.69772         | 98             | 1.933208              | 3.03691794788397   | 1.355150e-13 | 1.024493e-10         |
| 43 | cis_NEG   | REGULATION_OF_APOPTOSIS                                                           | 26538      | 4004      | 332       | 50.09140         | 103            | 2.056237              | 2.57159593406094   | 1.358116e-13 | 4.481790e-10         |
| 44 | cis_NEG   | REGULATION_OF_CELLULAR_METABOLIC_PROCESS                                          | 26538      | 4004      | 779       | 117.53396        | 195            | 1.659095              | 1.93421721363075   | 1.448070e-13 | 4.774275e-10         |
| 45 | cis_NEG   | REGULATION_OF_PROGRAMMED_CELL_DEATH                                               | 26538      | 4004      | 333       | 50.24237         | 103            | 2.050063              | 2.5603065238843099 | 1.678138e-13 | 5.537854e-10         |
| 46 | cis_NEG   | ESC_J1_UP_LATE_V1_UP                                                              | 26538      | 4004      | 187       | 28.21418         | 69             | 2.445578              | 3.3308396502093039 | 1.947295e-13 | 1.322792e-10         |
| 47 | cis_NEG   | REACTOME_AXON_GUIDANCE                                                            | 26538      | 4004      | 242       | 36.51247         | 82             | 2.245408              | 2.923517209222599  | 2.862543e-13 | 6.098616e-10         |
| 48 | trans_POS | CELL_CYCLE_GO_0007049                                                             | 26538      | 7352      | 313       | 86.71249         | 147            | 1.695258              | 2.3376181270088301 | 2.614531e-13 | 7.674223e-10         |
| 49 | trans_POS | CELL_PROLIFERATION_GO_0008283                                                     | 26538      | 7352      | 504       | 139.62650        | 215            | 1.538822              | 1.9689081192299699 | 2.553611e-13 | 8.426917e-10         |
| 50 | cis_NEG   | CELL_PROLIFERATION_GO_0008283                                                     | 26538      | 4004      | 504       | 76.04251         | 139            | 1.827925              | 2.1842558548645501 | 2.626997e-13 | 8.668989e-10         |
| 51 | trans_NEG | LEUKOCYTE_ACTIVATION                                                              | 26538      | 8266      | 67        | 20.86992         | 50             | 2.395896              | 6.534289968976599  | 3.032804e-13 | 1.000825e-09         |
| 52 | cis_NEG   | REGULATION_OF_METABOLIC_PROCESS                                                   | 26538      | 4004      | 790       | 119.19361        | 196            | 1.644383              | 1.90095968385789   | 3.071836e-13 | 1.013706e-09         |
| 53 | cis_NEG   | PROTEIN_MODIFICATION_PROCESS                                                      | 26538      | 4004      | 623       | 93.99699         | 163            | 1.734098              | 2.03838786206712   | 3.137103e-13 | 1.035244e-09         |
| 54 | trans_NEG | AKT_UP_V1_DN                                                                      | 26538      | 8266      | 187       | 58.24636         | 106            | 1.918856              | 2.917210759415001  | 3.989728e-13 | 3.016235e-10         |
| 55 | cis_NEG   | BIOPOLYMER_MODIFICATION                                                           | 26538      | 4004      | 641       | 96.71279         | 166            | 1.716422              | 2.0089947251683098 | 4.919522e-13 | 1.590442e-09         |
| 56 | cis_POS   | REACTOME_DEVELOPMENTAL_BIOLOGY                                                    | 26538      | 1529      | 384       | 22.12435         | 61             | 2.757143              | 3.1765510058548002 | 5.679627e-13 | 1.531200e-09         |
| 57 | trans_POS | LEUKOCYTE_ACTIVATION                                                              | 26538      | 7352      | 67        | 18.56146         | 47             | 2.532129              | 6.1641144756373996 | 6.119552e-13 | 2.019452e-09         |
| 58 | cis_NEG   | TRANSCRIPTION_FROM_RNA_POLYMERASE_II_PROMOTER                                     | 26538      | 4004      | 452       | 68.19685         | 127            | 1.862256              | 2.238396767660901  | 6.771950e-13 | 2.234744e-09         |
| 59 | cis_POS   | REACTOME_AXON_GUIDANCE                                                            | 26538      | 1529      | 242       | 13.94295         | 46             | 3.299158              | 3.9267914050264099 | 6.832196e-13 | 1.841960e-09         |
| 60 | cis_NEG   | BM1_DN_MEL18_DN_V1_DN                                                             | 26538      | 4004      | 140       | 21.12292         | 56             | 2.651149              | 3.790728886637698  | 7.024223e-13 | 5.310313e-10         |
| 61 | trans_NEG | CELL_CYCLE_PHASE                                                                  | 26538      | 8266      | 170       | 52.95124         | 98             | 1.850759              | 3.026963899097699  | 7.562511e-13 | 2.495629e-09         |
| 62 | cis_NEG   | DEFENSE_RESPONSE                                                                  | 26538      | 4004      | 256       | 38.62476         | 84             | 2.174771              | 2.7859104433281598 | 8.513678e-13 | 2.895154e-09         |
| 63 | cis_NEG   | STK33_BKM_DN                                                                      | 26538      | 4004      | 265       | 39.98267         | 86             | 2.150932              | 2.74135559527878   | 9.069867e-13 | 6.856819e-10         |
| 64 | trans_NEG | LEFT1_UP_V1_UP                                                                    | 26538      | 8266      | 189       | 58.86932         | 106            | 1.800598              | 2.8466073840375299 | 1.005104e-12 | 7.595884e-10         |
| 65 | trans_POS | CELL_CYCLE_PHASE                                                                  | 26538      | 7352      | 170       | 47.09624         | 91             | 1.932214              | 3.0316771015255    | 1.024686e-12 | 3.387345e-09         |
| 66 | cis_POS   | TRANSMEMBRANE_TRANSPORTER_ACTIVITY                                                | 26538      | 1529      | 370       | 21.31773         | 59             | 2.767649              | 3.1871535485654001 | 1.156725e-12 | 1.832252e-09         |
| 67 | cis_NEG   | RNA_METABOLIC_PROCESS                                                             | 26538      | 4004      | 827       | 124.77609        | 201            | 1.610885              | 1.849590532613299  | 1.214893e-12 | 4.098443e-09         |
| 68 | trans_NEG | LYMPHOCYTE_ACTIVATION                                                             | 26538      | 8266      | 59        | 18.37719         | 45             | 2.448687              | 17.919155232224099 | 1.246438e-12 | 4.113345e-09         |
| 69 | trans_POS | REACTOME_MITOTIC_PROMETAPHASE                                                     | 26538      | 7352      | 83        | 22.99405         | 54             | 2.348434              | 4.88754912988475   | 1.430403e-12 | 3.856365e-09         |
| 70 | trans_POS | MEMBRANE_PART                                                                     | 26538      | 7352      | 1630      | 451.56982        | 577            | 1.277765              | 1.46895936021918   | 1.508620e-12 | 1.404170e-09         |
| 71 | cis_NEG   | TBK1_DF_UP                                                                        | 26538      | 4004      | 285       | 43.00023         | 90             | 2.093012              | 2.6340083621961099 | 1.537517e-12 | 1.162363e-09         |
| 72 | cis_NEG   | KEGG_LEUKOCYTE_TRANSDOETHELIAL_MIGRATION                                          | 26538      | 4004      | 116       | 17.50185         | 49             | 2.799705              | 4.15435107823573   | 1.707094e-12 | 1.270078e-09         |
| 73 | cis_NEG   | REACTOME_CELL_SURFACE_INTERACTIONS_AT_THE_VASCULAR_WALL                           | 26538      | 4004      | 84        | 12.67375         | 40             | 3.156130              | 5.1574106995434299 | 1.769471e-12 | 4.770493e-09         |
| 74 | cis_NEG   | REGULATION_OF_GENE_EXPRESSION                                                     | 26538      | 4004      | 666       | 100.48474        | 169            | 1.681847              | 1.9539877953745199 | 1.874096e-12 | 6.184517e-09         |
| 75 | trans_NEG | ORGANELLE_ORGANIZATION_AND_BIOGENESIS                                             | 26538      | 8266      | 467       | 145.46017        | 217            | 1.491817              | 1.9435071866557001 | 2.037476e-12 | 6.729696e-09         |
| 76 | trans_NEG | PS3_DN_V1_UP                                                                      | 26538      | 8266      | 191       | 59.49228         | 106            | 1.781744              | 2.7783267993176201 | 2.465334e-12 | 1.863793e-09         |
| 77 | trans_NEG | CSR_LATE_UP_V1_UP                                                                 | 26538      | 8266      | 168       | 52.32628         | 96             | 1.834572              | 2.97009044914352   | 2.632635e-12 | 1.990272e-09         |
| 78 | cis_NEG   | REACTOME_DEVELOPMENTAL_BIOLOGY                                                    | 26538      | 4004      | 384       | 57.93715         | 111            | 1.915869              | 2.3248914521972699 | 2.685372e-12 | 7.239764e-09         |
| 79 | cis_NEG   | POST_TRANSLATIONAL_PROTEIN_MODIFICATION                                           | 26538      | 4004      | 470       | 70.91265         | 129            | 1.819139              | 2.16653265375937   | 2.730451e-12 | 9.010487e-09         |
| 80 | cis_NEG   | REACTOME_CYTOKINE_SIGNALING_IN_IMMUNE_SYSTEM                                      | 26538      | 4004      | 261       | 39.37915         | 84             | 2.133108              | 2.7063414118999901 | 2.738834e-12 | 7.383897e-09         |
| 81 | trans_NEG | HALLMARK_COMPLEMENT                                                               | 26538      | 8266      | 196       | 61.04966         | 108            | 1.769051              | 2.7354514769931599 | 2.834147e-12 | 5.668294e-10         |
| 82 | cis_NEG   | POSITIVE_REGULATION_OF_CELLULAR_PROCESS                                           | 26538      | 8266      | 654       | 203.70653        | 287            | 1.408890              | 1.75474208677953   | 2.914750e-12 | 9.618676e-09         |
| 83 | cis_POS   | SUBSTRATE_SPECIFIC_TRANSMEMBRANE_TRANSPORTER_ACTIVITY                             | 26538      | 1529      | 339       | 19.53165         | 55             | 2.815942              |                    |              |                      |

|    | set1_Name | set2_Name                                                                       | Background | set1_size | set2_size | expected_overlap | actual_overlap | enrichment_foldchange | odds_ratio          | FET_pvalue   | corrected_FET_pvalue |
|----|-----------|---------------------------------------------------------------------------------|------------|-----------|-----------|------------------|----------------|-----------------------|---------------------|--------------|----------------------|
| 1  | trans_POS | RPS14_DN.V1.UP                                                                  | 26538      | 7352      | 188       | 52.082900        | 96             | 1.843215              | 2.7457680872961602  | 9.463075e-12 | 7.154085e-09         |
| 2  | trans_NEG | HALLMARK_APICAL_JUNCTION                                                        | 26538      | 8266      | 199       | 61.984098        | 108            | 1.742382              | 2.6448418101059201  | 1.011858e-11 | 2.023716e-09         |
| 3  | ch_NEG    | KEGG_B_CELL_RECEPTOR_SIGNALING_PATHWAY                                          | 26538      | 4004      | 74        | 11.164871        | 36             | 3.224370              | 5.3705274692790002  | 1.022742e-11 | 7.608204e-09         |
| 4  | trans_NEG | CSR_LATE_UP.V1.DN                                                               | 26538      | 8266      | 164       | 51.082372        | 93             | 1.820589              | 2.9168823014321301  | 1.038649e-11 | 7.852189e-09         |
| 5  | ch_NEG    | PROTEIN_AMINO_ACID_PHOSPHORYLATION                                              | 26538      | 4004      | 276       | 41.842324        | 86             | 2.065207              | 2.5811622934113001  | 1.059588e-11 | 3.496642e-08         |
| 6  | trans_NEG | REACTOME_MITOTIC_PROMETAPHASE                                                   | 26538      | 8266      | 83        | 25.852664        | 56             | 2.166121              | 4.6089207217461903  | 1.075801e-11 | 2.900359e-08         |
| 7  | trans_NEG | REACTOME_INTEGRIN_CELL_SURFACE_INTERACTIONS                                     | 26538      | 8266      | 79        | 24.606753        | 54             | 2.194520              | 4.7991624528526509  | 1.138929e-11 | 3.070553e-08         |
| 8  | ch_NEG    | CELLULAR_PROTEIN_METABOLIC_PROCESS                                              | 26538      | 4004      | 1098      | 165.664029       | 248            | 1.497006              | 1.6843626481666401  | 1.193238e-11 | 3.937687e-08         |
| 9  | trans_POS | INTRINSIC_TO_PLASMA_MEMBRANE                                                    | 26538      | 7352      | 960       | 265.955234       | 360            | 1.353611              | 1.5948774871072     | 1.211776e-11 | 1.129376e-08         |
| 10 | ch_NEG    | HALLMARK_IL2_STATS_SIGNALING                                                    | 26538      | 4004      | 198       | 29.873841        | 68             | 2.276239              | 2.977222531699999   | 1.220126e-11 | 2.440252e-09         |
| 11 | ch_POS    | HALLMARK_ESTROGEN_RESPONSE_EARLY                                                | 26538      | 1529      | 198       | 11.407868        | 39             | 3.418893              | 4.090632698232101   | 1.223367e-11 | 2.446174e-09         |
| 12 | trans_NEG | ESC_V6.5_UP_EARLY.V1.DN                                                         | 26538      | 8266      | 169       | 52.639762        | 95             | 1.804719              | 2.8590474862041999  | 1.239850e-11 | 9.364193e-09         |
| 13 | trans_NEG | NUCLEOBASENUCLEOSIDENUCLEOTIDE_AND_NUCLEIC_ACID_METABOLIC_PROCESS               | 26538      | 8266      | 1226      | 381.871882       | 490            | 1.283153              | 1.5013728726060701  | 1.368926e-11 | 4.517456e-08         |
| 14 | trans_POS | P53_DN.V1.DN                                                                    | 26538      | 7352      | 189       | 52.359937        | 96             | 1.833463              | 2.7161042650912299  | 1.401944e-11 | 1.058690e-08         |
| 15 | trans_POS | KEGG_SYSTEMIC_LUPUS_ERYTHEMATOSUS                                               | 26538      | 7352      | 124       | 34.352551        | 70             | 2.037694              | 3.4053787588950909  | 1.591008e-11 | 1.183755e-08         |
| 16 | ch_NEG    | KEGG_T_CELL_RECEPTOR_SIGNALING_PATHWAY                                          | 26538      | 4004      | 107       | 16.143945        | 45             | 2.787423              | 4.1196373118463896  | 1.629930e-11 | 1.212698e-08         |
| 17 | trans_POS | HALLMARK_INFLAMMATORY_RESPONSE                                                  | 26538      | 7352      | 200       | 55.407340        | 100            | 1.804815              | 2.6317176304468598  | 1.756709e-11 | 3.513419e-09         |
| 18 | trans_POS | CSR_LATE_UP.V1.DN                                                               | 26538      | 7352      | 164       | 45.434019        | 86             | 1.892855              | 2.89938807296698    | 1.821942e-11 | 1.377389e-08         |
| 19 | ch_POS    | RECEPTOR_ACTIVITY                                                               | 26538      | 1529      | 569       | 32.73217         | 75             | 2.287756              | 2.55960812085668    | 1.876869e-11 | 2.972961e-08         |
| 20 | ch_NEG    | MTOR_UP.V1.DN                                                                   | 26538      | 4004      | 183       | 27.610671        | 64             | 2.317944              | 3.05949686175235    | 1.982293e-11 | 1.488484e-08         |
| 21 | ch_NEG    | REACTOME_COSTIMULATION_BY_THE_CD28_FAMILY                                       | 26538      | 4004      | 59        | 8.901801         | 31             | 3.482441              | 6.2709889577734104  | 2.155503e-11 | 5.811235e-08         |
| 22 | ch_NEG    | LYMPHOCYTE_ACTIVATION                                                           | 26538      | 4004      | 59        | 8.901801         | 31             | 3.482441              | 6.2709889577734104  | 2.155503e-11 | 7.113159e-08         |
| 23 | trans_POS | INTEGRAL_TO_MEMBRANE                                                            | 26538      | 7352      | 1294      | 358.485493       | 465            | 1.297124              | 1.4950746227445699  | 2.202590e-11 | 2.052814e-08         |
| 24 | ch_POS    | KRAS_KIDNEY_UP.V1.UP                                                            | 26538      | 1529      | 143       | 8.239016         | 32             | 3.883959              | 4.7937864284517504  | 2.580022e-11 | 1.850481e-08         |
| 25 | ch_NEG    | REGULATION_OF_NUCLEOBASENUCLEOSIDENUCLEOTIDE_AND_NUCLEIC_ACID_METABOLIC_PROCESS | 26538      | 4004      | 610       | 92.035572        | 154            | 1.673266              | 1.9367008801761699  | 2.742077e-11 | 9.048855e-08         |
| 26 | ch_NEG    | REACTOME_PLATELET_ACTIVATION_SIGNALING_AND_AGGREGATION                          | 26538      | 4004      | 197       | 29.722963        | 67             | 2.254149              | 2.93269725280606401 | 2.823724e-11 | 7.612754e-08         |
| 27 | trans_POS | REACTOME_IMMUNE_SYSTEM                                                          | 26538      | 7352      | 876       | 242.684151       | 331            | 1.363913              | 1.6124753073145499  | 2.937756e-11 | 7.919163e-08         |
| 28 | trans_NEG | TRANSMEMBRANE_RECEPTOR_ACTIVITY                                                 | 26538      | 8266      | 410       | 127.705931       | 191            | 1.495624              | 1.949849850823301   | 3.206542e-11 | 5.079162e-08         |
| 29 | trans_POS | T_CELL_ACTIVATION                                                               | 26538      | 7352      | 43        | 11.912578        | 33             | 2.770181              | 8.6449845717813201  | 3.243348e-11 | 1.070305e-07         |
| 30 | trans_NEG | CAMP_UP.V1.DN                                                                   | 26538      | 8266      | 195       | 60.738187        | 105            | 1.728731              | 2.5991367266022002  | 3.648163e-11 | 2.758769e-08         |
| 31 | trans_POS | M_PHASE                                                                         | 26538      | 7352      | 114       | 31.582184        | 65             | 2.058122              | 3.4038859074986299  | 4.616829e-11 | 1.523554e-07         |
| 32 | trans_NEG | HALLMARK_IL2_STATS_SIGNALING                                                    | 26538      | 8266      | 198       | 61.672620        | 106            | 1.718753              | 2.56688330740295    | 4.675426e-11 | 9.350852e-09         |
| 33 | trans_POS | RECEPTOR_ACTIVITY                                                               | 26538      | 7352      | 569       | 157.633883       | 229            | 1.452733              | 1.7819225454891101  | 4.679827e-11 | 7.412846e-08         |
| 34 | trans_POS | SNF5_DN.V1.UP                                                                   | 26538      | 7352      | 174       | 48.204386        | 89             | 1.846305              | 2.7535460724458801  | 4.731774e-11 | 3.577221e-08         |
| 35 | ch_POS    | ION_TRANSMEMBRANE_TRANSPORTER_ACTIVITY                                          | 26538      | 1529      | 273       | 15.729030        | 46             | 2.924529              | 3.38602913460854    | 5.289014e-11 | 8.377798e-08         |
| 36 | ch_NEG    | CELL_ACTIVATION                                                                 | 26538      | 4004      | 74        | 11.164871        | 35             | 3.134804              | 5.08025838268101    | 5.415153e-11 | 1.787000e-07         |
| 37 | ch_POS    | SUBSTRATE_SPECIFIC_TRANSPORTER_ACTIVITY                                         | 26538      | 1529      | 385       | 22.181965        | 57             | 2.569605              | 2.91358074859646    | 5.797295e-11 | 9.182915e-08         |
| 38 | trans_NEG | PRC2_EDZG_UP.V1.UP                                                              | 26538      | 8266      | 189       | 58.869319        | 102            | 1.732651              | 2.6114093424411702  | 5.797384e-11 | 4.362830e-08         |
| 39 | ch_POS    | REACTOME_NEURONAL_SYSTEM                                                        | 26538      | 1529      | 274       | 15.786646        | 46             | 2.913855              | 3.371042775942      | 6.007787e-11 | 1.618699e-07         |
| 40 | ch_NEG    | KEGG_NATURAL_KILLER_CELL_MEDIATED_CYTOTOXICITY                                  | 26538      | 4004      | 126       | 19.010626        | 49             | 2.577506              | 3.6131274840708998  | 6.202418e-11 | 4.614599e-08         |
| 41 | trans_POS | INTRINSIC_TO_MEMBRANE                                                           | 26538      | 7352      | 1312      | 363.472153       | 468            | 1.287581              | 1.4774142529990099  | 6.434986e-11 | 5.897407e-08         |
| 42 | ch_NEG    | MEL18_DN.V1.DN                                                                  | 26538      | 4004      | 142       | 21.424674        | 53             | 2.473783              | 3.38275811304355    | 6.496022e-11 | 4.916736e-08         |
| 43 | ch_NEG    | TRANSCRIPTION_FACTOR_ACTIVITY                                                   | 26538      | 4004      | 350       | 52.807295        | 100            | 1.893678              | 2.2831056164856698  | 6.628409e-11 | 1.049940e-07         |
| 44 | ch_NEG    | GONP_SHH_UP_LATE.V1.DN                                                          | 26538      | 4004      | 175       | 26.403648        | 61             | 2.310287              | 3.0423449103062001  | 6.790864e-11 | 5.133893e-08         |
| 45 | trans_POS | RPS14_DN.V1.DN                                                                  | 26538      | 7352      | 183       | 50.697716        | 92             | 1.814677              | 2.6589572531397101  | 7.609555e-11 | 5.752824e-08         |
| 46 | trans_POS | HALLMARK_KRAS_SIGNALING_UP                                                      | 26538      | 7352      | 199       | 55.130304        | 98             | 1.777607              | 2.5527166209060002  | 8.375638e-11 | 1.675128e-08         |
| 47 | ch_NEG    | KEGG_TYPE_1_DIABETES_MELLITUS                                                   | 26538      | 4004      | 37        | 5.582485         | 23             | 4.120029              | 9.2921043731868896  | 8.474758e-11 | 6.305220e-08         |
| 48 | ch_NEG    | CELL_JUNCTION                                                                   | 26538      | 4004      | 82        | 12.371995        | 37             | 2.960625              | 4.6609868717195999  | 8.640177e-11 | 8.052645e-08         |
| 49 | ch_NEG    | REGULATION_OF_SIGNAL_TRANSDUCTION                                               | 26538      | 4004      | 219       | 33.042279        | 71             | 2.148752              | 2.7301787398400001  | 8.939757e-11 | 2.950120e-07         |
| 50 | trans_POS | CSR_LATE_UP.V1.UP                                                               | 26538      | 7352      | 168       | 46.542166        | 86             | 1.847787              | 2.7573657122812598  | 9.432462e-11 | 7.130957e-08         |
| 51 | ch_NEG    | KEGG_VIRAL_MYOCARDITIS                                                          | 26538      | 4004      | 65        | 9.807069         | 32             | 3.262952              | 5.4927642364012099  | 9.608907e-11 | 7.149027e-08         |
| 52 | trans_NEG | KEGG_ECM_RECEPTOR_INTERACTION                                                   | 26538      | 8266      | 84        | 26.164142        | 55             | 2.102114              | 4.2193265623528704  | 9.780743e-11 | 7.284313e-08         |
| 53 | trans_NEG | REACTOME_G2_M_CHECKPOINTS                                                       | 26538      | 8266      | 41        | 12.770593        | 33             | 2.084062              | 9.1500211034146304  | 9.987576e-11 | 2.692650e-07         |
| 54 | ch_NEG    | KEGG_INTESTINAL_IMMUNE_NETWORK_FOR_IIGA_PRODUCTION                              | 26538      | 4004      | 43        | 6.487753         | 25             | 3.853414              | 7.8582512687105401  | 1.014823e-10 | 7.551029e-08         |
| 55 | ch_POS    | ORGAN_DEVELOPMENT                                                               | 26538      | 1529      | 567       | 32.667986        | 73             | 2.224604              | 2.4879563346846001  | 1.044056e-10 | 3.445386e-07         |
| 56 | trans_NEG | MITOTIC_CELL_CYCLE                                                              | 26538      | 8266      | 153       | 47.656116        | 86             | 1.804595              | 2.8566516882378001  | 1.143250e-10 | 3.772726e-07         |
| 57 | ch_NEG    | NEGATIVE_REGULATION_OF_DEVELOPMENTAL_PROCESS                                    | 26538      | 4004      | 194       | 29.270329        | 65             | 2.220679              | 2.86588582213597    | 1.146703e-10 | 3.784121e-07         |
| 58 | ch_NEG    | EGFR_UP.V1.DN                                                                   | 26538      | 4004      | 194       | 29.270329        | 65             | 2.220679              | 2.86588582213597    | 1.146703e-10 | 8.668007e-08         |
| 59 | trans_NEG | CORDONNLS_YAP_CONSERVED_SIGNATURE                                               | 26538      | 8266      | 56        | 17.442761        | 41             | 2.350545              | 6.0665144520977101  | 1.160450e-10 | 8.773003e-08         |
| 60 | ch_NEG    | KEGG_ALLOGRAFT_REJECTION                                                        | 26538      | 4004      | 32        | 4.828096         | 21             | 4.349541              | 10.793951701707501  | 1.271797e-10 | 9.462169e-08         |
| 61 | trans_POS | REACTOME_CHROMOSOME_MAINTENANCE                                                 | 26538      | 7352      | 116       | 32.136257        | 65             | 2.022638              | 3.3464765070517601  | 1.286940e-10 | 3.468959e-07         |
| 62 | ch_NEG    | ANATOMICAL_STRUCTURE_MORPHOGENESIS                                              | 26538      | 4004      | 373       | 56.277489        | 104            | 1.847896              | 2.2071074111722302  | 1.311615e-10 | 4.328329e-07         |
| 63 | ch_NEG    | KEGG_FOCAL_ADHESION                                                             | 26538      | 4004      | 199       | 30.024719        | 66             | 2.198189              | 2.8226737967693299  | 1.359645e-10 | 1.011576e-07         |
| 64 | trans_NEG | P53_DN.V1.DN                                                                    | 26538      | 8266      | 189       | 58.869319        | 101            | 1.715684              | 2.5595742719316598  | 1.515843e-10 | 1.145977e-07         |
| 65 | trans_NEG | KEGG_CYTOKINE_CYTOKINE_RECEPTOR_INTERACTION                                     | 26538      | 8266      | 260       | 80.984249        | 130            | 1.605250              | 2.22808261294629    | 1.579967e-10 | 1.175198e-07         |
| 66 | ch_POS    | KEGG_CELL_ADHESION_MOLECULES_CAMS                                               | 26538      | 1529      | 128       | 7.374783         | 29             | 3.932319              | 4.8639823247419501  | 1.591442e-10 | 1.184033e-07         |
| 67 | ch_NEG    | IDENTICAL_PROTEIN_BINDING                                                       | 26538      | 4004      | 299       | 45.112518        | 88             | 1.950678              | 2.377175958336702   | 1.732448e-10 | 2.744198e-07         |
| 68 | ch_NEG    | CELL_SURFACE_RECEPTOR_LINKED_SIGNAL_TRANSDUCTION_GO_0007166                     | 26538      | 4004      | 635       | 95.807521        | 156            | 1.628265              | 1.8665237012696999  | 1.803612e-10 | 5.951821e-07         |
| 69 | trans_NEG | GONP_SHH_UP_LATE.V1.UP                                                          | 26538      | 8266      | 180       | 56.066019        | 97             | 1.730103              | 2.6020607403453799  | 1.885467e-10 | 1.425413e-07         |
| 70 | trans_POS | RESPONSE_TO_STRESS                                                              | 26538      | 7352      | 496       | 137.410204       | 202            | 1.470051              | 1.8152977429592299  | 1.946507e-10 | 8.423472e-07         |
| 71 | ch_POS    | KRAS_600_UP.V1.UP                                                               | 26538      | 1529      | 274       | 15.786646        | 45             | 2.805511              | 3.2810271380049101  | 2.036902e-10 | 1.533895e-07         |
| 72 | ch_NEG    | REGULATION_OF_RNA_METABOLIC_PROCESS                                             | 26538      | 4004      | 464       | 70.007386        | 122            | 1.742873              | 2.0382400503138     | 2.139653e-10 | 7.060856e-07         |
| 73 | trans_NEG | REGULATION_OF_DEVELOPMENTAL_PROCESS                                             | 26538      | 8266      | 431       | 134.248967       | 196            | 1.459996              | 1.86418720056027    | 2.332638e-10 | 7.697705e-07         |
| 74 | trans_NEG | PHOSPHORYLATION                                                                 | 26538      | 4004      | 310       | 46.772176        | 90             | 1.924221              | 2.3321603529094102  | 2.367999e-10 | 7.814396e-07         |
| 75 | ch_NEG    | MTOR_UP.V1.DN                                                                   | 26538      | 8266      | 183       | 57.000452        | 98             | 1.719285              | 2.5670649819962401  | 2.417450e-10 | 1.827592e-07         |
| 76 | trans_NEG | EPF3_UP.V1.UP                                                                   | 26538      | 8266      | 183       | 57.000452        | 98             | 1.719285              | 2.5670649819962401  | 2.417450e-10 | 1.827592e-07         |
| 77 | trans_POS | REACTOME_ADAPTIVE_IMMUNE_SYSTEM                                                 | 26538      | 7352      | 503       | 139.349461       | 204            | 1.463945              | 1.80264808787135    | 2.427304e-10 | 6.544012e-07         |
| 78 | ch_NEG    | BIOPARTA_CTL_PATHWAY                                                            | 26538      | 4004      | 14        | 2.112292         | 13             | 6.154453              | 73.384249265328506  | 2.487222e-10 | 2.158909e-07         |
| 79 | trans_POS | REACTOME_G2_M_CHECKPOINTS                                                       | 26538      | 7352      | 41        | 11.358505        | 31             | 2.729232              | 8.1187388039223306  | 2.503601e-10 | 6.748708e-07         |
| 80 | trans_POS | KEGG_HEMATOPOIETIC_CELL_LINEAGE                                                 | 26538      | 7352      | 84        | 23.271083        | 51             | 2.191561              | 4.053975959038849   | 2.507128e-10 | 1.865304e-07         |
| 81 | ch_NEG    | LEUKOCYTE_ACTIVATION                                                            | 26538      | 4004      | 67        | 10.108825        | 32             | 3.165551              | 5.17850148603375    | 2.812721e-10 | 8.621981e-07         |
| 82 | trans_POS | PRC2_EDZG_UP.V1.UP                                                              | 26538      | 7352      | 189       | 52.359937        | 93             | 1.776167              | 2.5475588462715399  | 2.847966e-10 | 2.001                |

|    | set1_Name | set2_Name                                                                         | Background | set1_size | set2_size | expected_overlap | actual_overlap | enrichment_foldchange | odds_ratio          | FET_pvalue   | corrected_FET_pvalue |
|----|-----------|-----------------------------------------------------------------------------------|------------|-----------|-----------|------------------|----------------|-----------------------|---------------------|--------------|----------------------|
| 1  | cis_NEG   | CAHOY_ASTROGLIAL                                                                  | 26538      | 4004      | 98        | 14.786043        | 40             | 2.705254              | 3.91015120974772    | 6.320253e-10 | 4.778111e-07         |
| 2  | cis_POS   | KEGG_AXON_GUIDANCE                                                                | 26538      | 1529      | 127       | 7.317168         | 28             | 3.828617              | 4.6931724337303402  | 6.398267e-10 | 4.760310e-07         |
| 3  | cis_NEG   | ATF2_S_UP.V1_DN                                                                   | 26538      | 4004      | 184       | 27.761549        | 61             | 2.197284              | 2.818624972177      | 6.806421e-10 | 5.145654e-07         |
| 4  | cis_POS   | STK33_NOMO_DN                                                                     | 26538      | 1529      | 275       | 15.844261        | 44             | 2.777031              | 3.1779516281293101  | 7.568177e-10 | 5.721541e-07         |
| 5  | cis_NEG   | HOKA9_DN.V1_UP                                                                    | 26538      | 4004      | 189       | 28.515939        | 62             | 2.174223              | 2.7749408954695398  | 7.985996e-10 | 6.037413e-07         |
| 6  | cis_NEG   | ESC_V6.5_UP_LATE.V1_UP                                                            | 26538      | 4004      | 185       | 27.912427        | 61             | 2.185406              | 2.7958425189646499  | 8.672191e-10 | 6.566176e-07         |
| 7  | trans_NEG | HALLMARK_MYC_TARGETS.V1                                                           | 26538      | 8266      | 196       | 61.049665        | 102            | 1.670771              | 2.41803130951875    | 8.773064e-10 | 1.754813e-07         |
| 8  | trans_NEG | REGULATION_OF_CELL_PROLIFERATION                                                  | 26538      | 8266      | 301       | 83.754842        | 144            | 1.535921              | 2.04568161479869    | 8.846832e-10 | 2.919454e-06         |
| 9  | cis_POS   | HALLMARK_EPITHELIAL_MESENCHYMAL_TRANSITION                                        | 26538      | 1529      | 199       | 11.465483        | 36             | 3.139899              | 3.67504735740413    | 8.847237e-10 | 1.769447e-07         |
| 10 | cis_NEG   | NOTCH_DN.V1_UP                                                                    | 26538      | 4004      | 181       | 27.308916        | 60             | 2.197085              | 2.8177836247752799  | 9.304161e-10 | 7.101986e-07         |
| 11 | trans_NEG | NUCLEUS                                                                           | 26538      | 8266      | 1404      | 437.314945       | 541            | 1.237095              | 1.41274375148512    | 9.499176e-10 | 8.853232e-07         |
| 12 | trans_NEG | REACTOME_G1_S_TRANSITION                                                          | 26538      | 8266      | 105       | 32.705177        | 63             | 1.926301              | 3.3335404302978999  | 9.612405e-10 | 2.591504e-06         |
| 13 | trans_NEG | T_CELL_ACTIVATION                                                                 | 26538      | 8266      | 43        | 13.393549        | 33             | 2.463873              | 7.3191925050819101  | 9.805584e-10 | 3.235643e-06         |
| 14 | trans_NEG | M_PHASE                                                                           | 26538      | 8266      | 114       | 35.508478        | 67             | 1.888873              | 3.16856354623989    | 9.879071e-10 | 3.260093e-06         |
| 15 | cis_NEG   | MEL18_DN.V1_UP                                                                    | 26538      | 4004      | 139       | 20.972040        | 50             | 2.384127              | 3.1888670354108899  | 9.934230e-10 | 7.510278e-07         |
| 16 | trans_NEG | MEK_UP.V1_DN                                                                      | 26538      | 4004      | 190       | 28.666817        | 62             | 2.162779              | 2.7531931947867299  | 1.012333e-09 | 7.653238e-07         |
| 17 | cis_NEG   | L_KAPPA8_KINASE_NF_KAPPA8_CASCADE                                                 | 26538      | 4004      | 111       | 16.747456        | 43             | 2.567954              | 3.5863054263036499  | 1.035952e-09 | 3.419640e-06         |
| 18 | cis_NEG   | KRAS_E60_UP.V1_DN                                                                 | 26538      | 4004      | 276       | 41.642324        | 81             | 1.945136              | 2.3653078658080899  | 1.050170e-09 | 7.939252e-07         |
| 19 | cis_POS   | REACTOME_TRANSMEMBRANE_TRANSPORT_OF_SMALL_MOLECULES                               | 26538      | 1529      | 404       | 23.276660        | 56             | 2.405843              | 2.6937693679372199  | 1.064412e-09 | 2.869655e-06         |
| 20 | trans_NEG | CELL_SURFACE_RECEPTOR_LINKED_SIGNAL_TRANSDUCTION_GO_0007166                       | 26538      | 8266      | 635       | 197.788454       | 269            | 1.360039              | 1.64564113833526    | 1.107941e-09 | 3.656204e-06         |
| 21 | cis_NEG   | AKT_UP_MTOR_DN.V1_DN                                                              | 26538      | 4004      | 182       | 27.459794        | 60             | 2.185013              | 2.7946361473040602  | 1.196874e-09 | 9.048367e-07         |
| 22 | cis_POS   | ANATOMICAL_STRUCTURE_MORPHOGENESIS                                                | 26538      | 1529      | 373       | 21.490580        | 53             | 2.466197              | 2.7702526474622502  | 1.223404e-09 | 4.037233e-06         |
| 23 | cis_NEG   | RESPONSE_TO_EXTERNAL_STIMULUS                                                     | 26538      | 4004      | 305       | 46.017786        | 87             | 1.809573              | 2.27357018980004    | 1.226756e-09 | 4.048294e-06         |
| 24 | cis_NEG   | KRAS_DF.V1_UP                                                                     | 26538      | 4004      | 191       | 28.817695        | 62             | 2.151456              | 2.7313189051732302  | 1.280036e-09 | 9.677071e-07         |
| 25 | cis_POS   | CAHOY_NEURONAL                                                                    | 26538      | 1529      | 99        | 5.703934         | 24             | 4.207622              | 5.3005534151321303  | 1.383199e-09 | 1.045698e-06         |
| 26 | cis_NEG   | KEGG_PRIMARY_IMMUNODEFICIENCY                                                     | 26538      | 4004      | 35        | 5.280730         | 21             | 3.978723              | 8.4798703853423198  | 1.440383e-09 | 1.071645e-06         |
| 27 | trans_NEG | HALLMARK_IL6_JAK_STAT3_SIGNALING                                                  | 26538      | 8266      | 86        | 26.787098        | 54             | 2.015896              | 3.7479317730207899  | 1.450028e-09 | 2.900057e-07         |
| 28 | trans_POS | STK33_SKM_UP                                                                      | 26538      | 7352      | 268       | 74.245836        | 120            | 1.616252              | 2.1344128403889301  | 1.466693e-09 | 1.108999e-06         |
| 29 | trans_POS | NUCLEOBASENUCLEOSIDENUCLEOTIDE_AND_NUCLEIC_ACID_METABOLIC_PROCESS                 | 26538      | 7352      | 1226      | 339.646997       | 433            | 1.274893              | 1.4515009819048501  | 1.502143e-09 | 4.957073e-06         |
| 30 | cis_NEG   | IL2_UP.V1_UP                                                                      | 26538      | 4004      | 183       | 27.610671        | 60             | 2.173073              | 2.7718056271540602  | 1.520821e-09 | 1.148740e-06         |
| 31 | trans_NEG | REACTOME_CELL_SURFACE_INTERACTIONS_AT_THE_VASCULAR_WALL                           | 26538      | 8266      | 84        | 26.164142        | 53             | 2.025673              | 3.7989029216412     | 1.583700e-09 | 4.296615e-06         |
| 32 | trans_NEG | HALLMARK_ESTROGEN_RESPONSE_EARLY                                                  | 26538      | 8266      | 198       | 61.672620        | 102            | 1.653894              | 2.3654434343756301  | 1.812721e-09 | 3.625443e-07         |
| 33 | trans_POS | POSITIVE_REGULATION_OF_BIOLOGICAL_PROCESS                                         | 26538      | 7352      | 693       | 191.986435       | 263            | 1.369888              | 1.61820601062008    | 1.966904e-09 | 6.490782e-06         |
| 34 | trans_NEG | RESPONSE_TO_WOUNDING                                                              | 26538      | 8266      | 184       | 57.311930        | 96             | 1.675044              | 2.427867206746702   | 2.274181e-09 | 7.504796e-06         |
| 35 | cis_NEG   | REACTOME_INTEGRIN_CELL_SURFACE_INTERACTIONS                                       | 26538      | 4004      | 79        | 11.919381        | 34             | 2.852502              | 4.2799002043031607  | 2.296070e-09 | 6.190204e-06         |
| 36 | cis_POS   | REACTOME_HEMOSTASIS                                                               | 26538      | 1529      | 446       | 25.695111        | 59             | 2.296032              | 2.55340108010168    | 2.332307e-09 | 6.287899e-06         |
| 37 | cis_NEG   | REACTOME_IMMUNOREGULATORY_INTERACTIONS_BETWEEN_A_LYMPHOID_AND_A_NON_LYMPHOID_CELL | 26538      | 4004      | 58        | 8.750923         | 28             | 3.199962              | 5.262116859469806   | 2.499641e-09 | 6.739033e-06         |
| 38 | trans_POS | DEFENSE_RESPONSE                                                                  | 26538      | 7352      | 256       | 70.921396        | 115            | 1.621513              | 2.1463301534074799  | 2.530238e-09 | 8.349786e-06         |
| 39 | cis_NEG   | KRAS_DF.V1_DN                                                                     | 26538      | 4004      | 190       | 28.666817        | 61             | 2.127896              | 2.6866691253391499  | 2.801183e-09 | 2.117694e-06         |
| 40 | cis_NEG   | WNT_UP.V1_DN                                                                      | 26538      | 4004      | 164       | 24.743960        | 55             | 2.222762              | 2.865218672706801   | 2.876220e-09 | 2.174423e-06         |
| 41 | cis_NEG   | SNF3_DN.V1_DN                                                                     | 26538      | 4004      | 160       | 24.140478        | 54             | 2.236907              | 2.8923932859181488  | 3.089117e-09 | 2.335373e-06         |
| 42 | trans_POS | HALLMARK_MYOGENESIS                                                               | 26538      | 7352      | 199       | 55.130304        | 94             | 1.709501              | 2.3534782038610701  | 3.190067e-09 | 6.381351e-07         |
| 43 | cis_NEG   | REACTOME_GENERATION_OF_SECOND_MESSENGER_MOLECULES                                 | 26538      | 4004      | 25        | 3.771950         | 17             | 4.508993              | 12.005476684712     | 3.306011e-09 | 9.074766e-06         |
| 44 | trans_NEG | REACTOME_MITOTIC_G1_S_PHASES                                                      | 26538      | 8266      | 128       | 39.869169        | 72             | 1.805907              | 2.85813997724763    | 3.464295e-09 | 9.339739e-06         |
| 45 | trans_NEG | APOPTOSIS_GO                                                                      | 26538      | 8266      | 422       | 131.443666       | 188            | 1.430271              | 1.7938847700610501  | 3.958483e-09 | 1.306300e-05         |
| 46 | trans_NEG | HALLMARK_APOPTOSIS                                                                | 26538      | 8266      | 159       | 49.524983        | 85             | 1.716305              | 2.5549891036378201  | 4.064863e-09 | 8.129726e-07         |
| 47 | cis_POS   | TRANSMEMBRANE_RECEPTOR_ACTIVITY                                                   | 26538      | 1529      | 410       | 23.622353        | 55             | 2.328303              | 2.5911467756227502  | 4.920847e-09 | 7.794621e-06         |
| 48 | trans_NEG | PROGRAMMED_CELL_DEATH                                                             | 26538      | 8266      | 423       | 131.755144       | 188            | 1.426889              | 1.78615535649526    | 4.946819e-09 | 1.632450e-05         |
| 49 | trans_NEG | REACTOME_ACTIVATION_OF_THE_PRE_REPLICATIVE_COMPLEX                                | 26538      | 8266      | 30        | 9.344336         | 25             | 2.675417              | 11.0785676346882    | 5.114053e-09 | 1.376749e-05         |
| 50 | trans_NEG | HALLMARK_INTERFERON_ALPHA_RESPONSE                                                | 26538      | 8266      | 97        | 30.213354        | 58             | 1.919681              | 3.303447572972999   | 5.270823e-09 | 1.054181e-06         |
| 51 | cis_NEG   | CYCLIN_D1_UP.V1_UP                                                                | 26538      | 4004      | 184       | 27.761549        | 59             | 2.125242              | 2.6808648642003999  | 5.326771e-09 | 4.027039e-06         |
| 52 | trans_NEG | REACTOME_S_PHASE                                                                  | 26538      | 8266      | 106       | 33.016655        | 62             | 1.877840              | 3.13062786081856    | 5.337890e-09 | 1.439095e-05         |
| 53 | cis_NEG   | NFE2L3.V2                                                                         | 26538      | 4004      | 442       | 66.688070        | 113            | 1.694456              | 1.96009373849746    | 5.522984e-09 | 4.176132e-06         |
| 54 | trans_NEG | REACTOME_GENERATION_OF_SECOND_MESSENGER_MOLECULES                                 | 26538      | 8266      | 25        | 7.786947         | 22             | 2.825241              | 16.250675488808799  | 5.614778e-09 | 1.513744e-05         |
| 55 | cis_NEG   | KRAS_E60_LUNG_BREAST_UP.V1_DN                                                     | 26538      | 4004      | 281       | 42.396714        | 80             | 1.886939              | 2.26513960819051    | 6.145075e-09 | 4.645677e-06         |
| 56 | cis_POS   | ESTABLISHMENT_OF_LOCALIZATION                                                     | 26538      | 1529      | 857       | 49.376479        | 92             | 1.983235              | 2.0288911952775299  | 6.303924e-09 | 2.109956e-05         |
| 57 | trans_POS | REGULATION_OF_IMMUNE_SYSTEM_PROCESS                                               | 26538      | 7352      | 64        | 17.730349        | 40             | 2.256019              | 4.3673734177284702  | 6.420768e-09 | 2.118656e-05         |
| 58 | trans_NEG | TBKF_DF_UP                                                                        | 26538      | 8266      | 285       | 88.771196        | 135            | 1.520764              | 2.005888036365801   | 6.437776e-09 | 4.866958e-06         |
| 59 | trans_POS | MITOTIC_CELL_CYCLE                                                                | 26538      | 7352      | 153       | 42.366615        | 76             | 1.793019              | 2.592094746508008   | 6.447816e-09 | 2.127778e-05         |
| 60 | trans_NEG | KEGG_INTESTINAL_IMMUNE_NETWORK_FOR_IGA_PRODUCTION                                 | 26538      | 8266      | 43        | 13.303549        | 32             | 2.389210              | 6.4500971476272101  | 6.655637e-09 | 4.951794e-06         |
| 61 | trans_POS | REACTOME_GENERATION_OF_SECOND_MESSENGER_MOLECULES                                 | 26538      | 7352      | 25        | 6.925918         | 21             | 3.032089              | 13.7300220922316    | 7.158485e-09 | 1.629627e-05         |
| 62 | cis_POS   | STK33_SKM_DN                                                                      | 26538      | 1529      | 265       | 15.268106        | 41             | 2.685336              | 3.0485304277816301  | 7.477555e-09 | 5.857152e-06         |
| 63 | trans_NEG | EXTRACELLULAR_MATRIX_PART                                                         | 26538      | 8266      | 57        | 17.754239        | 39             | 2.196658              | 4.8070412527719002  | 7.904163e-09 | 7.386680e-06         |
| 64 | trans_NEG | EGFR_UP.V1_UP                                                                     | 26538      | 8266      | 190       | 59.180797        | 97             | 1.639045              | 2.32102252303071    | 8.167998e-09 | 6.175007e-06         |
| 65 | trans_NEG | KEGG_LEUKOCYTE_TRANSENDOTHELIAL_MIGRATION                                         | 26538      | 8266      | 116       | 36.131434        | 66             | 1.826964              | 2.9331654617770302  | 8.222871e-09 | 6.117816e-06         |
| 66 | cis_POS   | AKT_UP.V1_DN                                                                      | 26538      | 1529      | 187       | 10.774098        | 33             | 3.062902              | 3.5589891165669001  | 8.360613e-09 | 6.320623e-06         |
| 67 | trans_POS | REACTOME_G1_S_TRANSITION                                                          | 26538      | 7352      | 105       | 29.088654        | 57             | 1.959513              | 3.11503510522639    | 8.419203e-09 | 2.698817e-05         |
| 68 | trans_NEG | CAHOY_ASTROGLIAL                                                                  | 26538      | 8266      | 98        | 30.524832        | 58             | 1.900092              | 3.2206496353634502  | 8.999207e-09 | 6.803476e-06         |
| 69 | cis_NEG   | REACTOME_CELL_CELL_COMMUNICATION                                                  | 26538      | 4004      | 118       | 17.802602        | 43             | 2.415242              | 3.2506711520274301  | 9.172123e-09 | 2.478289e-05         |
| 70 | trans_NEG | CELL_DEVELOPMENT                                                                  | 26538      | 8266      | 987       | 176.607958       | 240            | 1.358942              | 1.6406827088508     | 9.389723e-09 | 3.098609e-05         |
| 71 | trans_POS | STK33_NOMO_DN                                                                     | 26538      | 7352      | 275       | 76.185093        | 120            | 1.575111              | 2.037297974287      | 9.424630e-09 | 7.125020e-06         |
| 72 | cis_POS   | REACTOME_SIGNALING_BY_IL5                                                         | 26538      | 4004      | 106       | 15.903067        | 40             | 2.591084              | 3.4349400351716599  | 9.469838e-09 | 2.553688e-05         |
| 73 | cis_NEG   | HALLMARK_GLYCOLYSIS                                                               | 26538      | 4004      | 200       | 30.175597        | 62             | 2.054640              | 2.5523678896667001  | 9.490146e-09 | 1.896029e-06         |
| 74 | cis_NEG   | KRAS_E60_UP.V1_DN                                                                 | 26538      | 4004      | 139       | 20.972040        | 48             | 2.288762              | 2.9522613802798401  | 9.939831e-09 | 7.348912e-06         |
| 75 | trans_NEG | M_PHASE_OF_MITOTIC_CELL_CYCLE                                                     | 26538      | 8266      | 85        | 26.475600        | 52             | 1.964071              | 3.498653459083802   | 1.071519e-08 | 3.539013e-05         |
| 76 | trans_NEG | KEGG_CHEMOKINE_SIGNALING_PATHWAY                                                  | 26538      | 8266      | 186       | 57.934886        | 95             | 1.639772              | 2.3228127417725902  | 1.125295e-08 | 8.372194e-06         |
| 77 | cis_NEG   | REGULATION_OF_BIOLOGICAL_QUALITY                                                  | 26538      | 4004      | 412       | 62.161730        | 106            | 1.705229              | 1.9753565056109099  | 1.131247e-08 | 3.733115e-05         |
| 78 | trans_NEG | ATF2_UP.V1_DN                                                                     | 26538      | 4004      | 183       | 27.610671        | 58             | 2.100537              | 2.6348173590746802  | 1.151695e-08 | 8.706817e-06         |
| 79 | cis_NEG   | KEGG_REGULATION_OF_ACTIN_CYTOSKELETON                                             | 26538      | 4004      | 210       | 31.684377        | 64             | 2.019923              | 2.4907760915872399  | 1.156679e-08 | 8.605602e-06         |
| 80 | cis_NEG   | ERB2_UP.V1_DN                                                                     | 26538      | 4004      | 192       | 28.968573        | 60             | 2.071210              | 2.58167469080826401 | 1.171146e-08 | 8.853866e-06         |
| 81 | cis_POS   | VOLTAGE_GATED_CHANNEL_ACTIVITY                                                    | 26538      | 1529      | 71        | 4.090700         | 19             | 4.644682              | 6.038133556956      | 1.231085e-08 | 1.950038e-05         |
| 82 | trans_POS | CORDENONBIL_YAP_CONSERVED_SIGNATURE                                               | 26538      | 7352      | 56        | 15.514055        | 36             | 2.320476              | 4.7152313337620102  | 1.232528e-08 | 9.317915e-06         |
| 83 | cis_POS   | METAL_ION_TRANSMEMBRANE_TRAN                                                      |            |           |           |                  |                |                       |                     |              |                      |

|    | set1_Name | set2_Name                                                      | Background | set1_size | set2_size | expected_overlap | actual_overlap | enrichment.foldchange | odds_ratio         | FET_pvalue   | corrected.FET.pvalue |
|----|-----------|----------------------------------------------------------------|------------|-----------|-----------|------------------|----------------|-----------------------|--------------------|--------------|----------------------|
| 1  | cis_POS   | MTOR_UP.V1_DN                                                  | 26538      | 1529      | 183       | 10.543636        | 32             | 3.035006              | 3.5186805674107098 | 1.757487e-08 | 1.328667e-05         |
| 2  | cis_NEG   | PHOSPHOTRANSFERASE_ACTIVITY_ALCOHOL_GROUP_AS_ACCEPTOR          | 26538      | 4004      | 331       | 49.940613        | 89             | 1.782117              | 2.0940244583795802 | 1.838228e-08 | 2.911775e-05         |
| 3  | trans_NEG | DNA_METABOLIC_PROCESS                                          | 26538      | 8266      | 253       | 78.803904        | 121            | 1.535457              | 2.04153955969816   | 1.923615e-08 | 6.347929e-05         |
| 4  | cis_NEG   | KEGG_TIGHT_JUNCTION                                            | 26538      | 4004      | 129       | 19.463260        | 45             | 2.312048              | 3.037656906633601  | 1.977933e-08 | 1.471582e-05         |
| 5  | cis_NEG   | HALLMARK_MTORC1_SIGNALING                                      | 26538      | 4004      | 199       | 30.024719        | 61             | 2.031659              | 2.5105769944459402 | 1.984557e-08 | 3.969113e-08         |
| 6  | cis_NEG   | REGULATION_OF_MULTICELLULAR_ORGANISMAL_PROCESS                 | 26538      | 4004      | 146       | 22.028186        | 49             | 2.224423              | 2.8656219630516402 | 1.993481e-08 | 6.578422e-05         |
| 7  | trans_NEG | EXTRACELLULAR_REGION                                           | 26538      | 8266      | 435       | 135.482878       | 190            | 1.402288              | 1.7310447458148699 | 2.061718e-08 | 1.921521e-05         |
| 8  | trans_NEG | POSITIVE_REGULATION_OF_CELL_PROLIFERATION                      | 26538      | 8266      | 144       | 44.852815        | 77             | 1.716726              | 2.5548201081924802 | 2.110985e-08 | 6.866285e-05         |
| 9  | cis_NEG   | KEGG_GRAFT_VERSUS_HOST_DISEASE                                 | 26538      | 4004      | 33        | 4.978974         | 19             | 3.816048              | 7.6684459822492    | 2.277391e-08 | 1.694379e-05         |
| 10 | cis_NEG   | RELA_DN.V1_DN                                                  | 26538      | 4004      | 138       | 20.821162        | 47             | 2.257319              | 2.9291860862472988 | 2.288329e-08 | 1.730732e-05         |
| 11 | trans_POS | ANATOMICAL_STRUCTURE_DEVELOPMENT                               | 26538      | 7352      | 993       | 275.097445       | 353            | 1.263182              | 1.4615115023046801 | 2.313882e-08 | 7.638943e-05         |
| 12 | trans_POS | M_PHASE_OF_MITOTIC_CELL_CYCLE                                  | 26538      | 7352      | 85        | 23.548120        | 48             | 2.038379              | 3.4007904263027699 | 2.329652e-08 | 7.687853e-05         |
| 13 | trans_NEG | KEGG_GRAFT_VERSUS_HOST_DISEASE                                 | 26538      | 8266      | 33        | 10.278770        | 26             | 2.529486              | 8.2324296587048806 | 2.338777e-08 | 1.740050e-05         |
| 14 | cis_NEG   | KEGG_GLUTATHIONE_METABOLISM                                    | 26538      | 4004      | 49        | 7.393021         | 24             | 3.246305              | 5.4288496537491602 | 2.360774e-08 | 1.778736e-05         |
| 15 | trans_POS | MULTICELLULAR_ORGANISMAL_DEVELOPMENT                           | 26538      | 7352      | 1029      | 285.070766       | 364            | 1.276876              | 1.45072354974471   | 2.571122e-08 | 8.484704e-05         |
| 16 | trans_POS | CHROMOSOMAL_PART                                               | 26538      | 7352      | 95        | 26.318487        | 52             | 1.975797              | 3.17099166419638   | 2.581109e-08 | 2.405594e-05         |
| 17 | trans_POS | REACTOME_MITOTIC_G1_S_PHASES                                   | 26538      | 7352      | 128       | 35.460698        | 65             | 1.833015              | 2.7074561085009988 | 2.629466e-08 | 7.08041e-05          |
| 18 | trans_NEG | ORGANELLE_PART                                                 | 26538      | 8266      | 1177      | 366.609466       | 453            | 1.235647              | 1.40353076746999   | 2.723758e-08 | 2.538542e-05         |
| 19 | cis_NEG   | ESC_J1_UP_EARLY.V1_UP                                          | 26538      | 4004      | 178       | 26.86282         | 56             | 2.085173              | 2.80557314873814   | 2.726566e-08 | 2.061276e-05         |
| 20 | cis_POS   | REACTOME_INTEGRATION_OF_ENERGY_METABOLISM                      | 26538      | 1529      | 114       | 6.568166         | 24             | 3.653988              | 4.4148851055314502 | 2.730786e-08 | 7.362199e-05         |
| 21 | trans_NEG | KEGG_PRIMARY_IMMUNODEFICIENCY                                  | 26538      | 8266      | 35        | 10.901726        | 27             | 2.476672              | 7.4809127008335299 | 2.797381e-08 | 2.081251e-05         |
| 22 | trans_NEG | STK33_NOMO_DN                                                  | 26538      | 8266      | 275       | 85.66417         | 129            | 1.506017              | 1.9882428260528    | 2.848943e-08 | 2.153801e-05         |
| 23 | cis_NEG   | TRANSFERASE_ACTIVITY_TRANSFERRING_PHOSPHORUS_CONTAINING_GROUPS | 26538      | 4004      | 419       | 63.217876        | 106            | 1.676741              | 1.9300472815539    | 2.925751e-08 | 4.634390e-05         |
| 24 | cis_NEG   | KINASE_ACTIVITY                                                | 26538      | 4004      | 364       | 54.919587        | 95             | 1.729802              | 2.0115382455528198 | 3.038769e-08 | 4.813398e-05         |
| 25 | cis_NEG   | KRAS_600.LUNG.BREAST_UP.V1_UP                                  | 26538      | 4004      | 276       | 41.642324        | 77             | 1.849080              | 2.200631193673308  | 3.044157e-08 | 2.391383e-05         |
| 26 | cis_NEG   | CELL_CELL_ADHESION                                             | 26538      | 4004      | 86        | 12.975507        | 34             | 2.620322              | 3.7024837020819601 | 3.091919e-08 | 1.020333e-04         |
| 27 | cis_NEG   | HALLMARK_IL6_JAK_STAT3_SIGNALING                               | 26538      | 4004      | 86        | 12.975507        | 34             | 2.620322              | 3.7024837020819601 | 3.091919e-08 | 6.183338e-06         |
| 28 | cis_NEG   | T_CELL_ACTIVATION                                              | 26538      | 4004      | 43        | 6.487753         | 22             | 3.391004              | 5.922323063375797  | 3.318687e-08 | 1.095167e-04         |
| 29 | cis_POS   | ESC_V6_5_UP_EARLY.V1_UP                                        | 26538      | 1529      | 169       | 9.737019         | 30             | 3.081025              | 3.5804910083037198 | 3.418316e-08 | 2.584247e-05         |
| 30 | trans_POS | REACTOME_ACTIVATION_OF_THE_PRE_REPLICATIVE_COMPLEX             | 26538      | 7352      | 30        | 8.311101         | 23             | 2.787383              | 8.5871606742282305 | 3.489516e-08 | 9.407736e-05         |
| 31 | cis_POS   | GENERATION_OF_NEURONS                                          | 26538      | 1529      | 83        | 4.782088         | 20             | 4.182275              | 5.2471983490715801 | 3.574592e-08 | 1.179615e-04         |
| 32 | trans_POS | REACTOME_E2F_MEDIATED_REGULATION_OF_DNA_REPLICATION            | 26538      | 7352      | 32        | 8.865174         | 24             | 2.707223              | 7.8501054683096401 | 3.650138e-08 | 9.840771e-05         |
| 33 | trans_NEG | REACTOME_INTERFERON_GAMMA_SIGNALING                            | 26538      | 8266      | 57        | 17.754239        | 38             | 2.140334              | 4.436492949614396  | 3.673667e-08 | 9.904206e-05         |
| 34 | trans_POS | REGULATION_OF_LYMPHOCYTE_ACTIVATION                            | 26538      | 7352      | 34        | 9.419248         | 25             | 2.654140              | 7.2690705805089304 | 3.682095e-08 | 1.215091e-04         |
| 35 | trans_POS | ORGAN_DEVELOPMENT                                              | 26538      | 7352      | 567       | 157.079810       | 216            | 1.375097              | 1.6242340416671199 | 3.778184e-08 | 1.246801e-04         |
| 36 | cis_NEG   | REGULATION_OF_IMMUNE_SYSTEM_PROCESS                            | 26538      | 4004      | 64        | 9.856191         | 28             | 2.898694              | 4.490323610001199  | 3.789388e-08 | 1.250491e-04         |
| 37 | trans_NEG | RESPONSE_TO_EXTERNAL_STIMULUS                                  | 26538      | 8266      | 305       | 95.000754        | 140            | 1.473673              | 1.8907050505516    | 4.052158e-08 | 1.337123e-04         |
| 38 | cis_NEG   | REACTOME_INTERFERON_GAMMA_SIGNALING                            | 26538      | 4004      | 57        | 8.60045          | 26             | 3.023240              | 4.7442398352217801 | 4.055340e-08 | 1.093320e-04         |
| 39 | trans_POS | ORGANELLE_ORGANIZATION_AND_BIOGENESIS                          | 26538      | 7352      | 467       | 129.376140       | 183            | 1.414480              | 1.69891731613351   | 4.082704e-08 | 1.347292e-04         |
| 40 | cis_POS   | NEURON_DIFFERENTIATION                                         | 26538      | 1529      | 76        | 4.378778         | 19             | 4.339111              | 5.5080932233093103 | 4.121582e-08 | 1.360122e-04         |
| 41 | trans_POS | KEGG_CELL_CYCLE                                                | 26538      | 7352      | 124       | 34.32551         | 63             | 1.833925              | 2.709727060524098  | 4.175985e-08 | 3.106873e-05         |
| 42 | trans_NEG | CELL_CYCLE_CHECKPOINT_G0_0000075                               | 26538      | 8266      | 47        | 14.639460        | 33             | 2.254181              | 5.2266704628048197 | 4.191803e-08 | 1.383205e-04         |
| 43 | cis_POS   | KRAS_600.LUNG.BREAST_UP.V1_DN                                  | 26538      | 1529      | 281       | 16.189954        | 41             | 2.532435              | 2.8434827343201499 | 4.239453e-08 | 3.205026e-05         |
| 44 | cis_NEG   | REACTOME_SIGNALING_BY_RHO_GTPASES                              | 26538      | 4004      | 111       | 16.747456        | 40             | 2.388422              | 3.1823402791333002 | 4.260514e-08 | 1.148635e-04         |
| 45 | cis_NEG   | POSITIVE_REGULATION_OF_DEVELOPMENTAL_PROCESS                   | 26538      | 4004      | 212       | 31.968133        | 63             | 1.968604              | 2.4014762484254102 | 4.294559e-08 | 1.417205e-04         |
| 46 | cis_POS   | KRAS.DEV1_DN                                                   | 26538      | 1529      | 190       | 10.946944        | 32             | 2.923190              | 3.3618489402260002 | 4.418303e-08 | 3.402374e-05         |
| 47 | trans_NEG | REGULATION_OF_APOPTOSIS                                        | 26538      | 8266      | 332       | 103.410656       | 150            | 1.450527              | 1.837083958665701  | 4.785814e-08 | 1.579319e-04         |
| 48 | cis_NEG   | PROTEIN_DOMAIN_SPECIFIC_BINDING                                | 26538      | 4004      | 72        | 10.863215        | 30             | 2.761613              | 4.04251113247463   | 4.850192e-08 | 7.688704e-05         |
| 49 | trans_NEG | HMOX1_DN.V1_DN                                                 | 26538      | 8266      | 188       | 58.557842        | 94             | 1.605250              | 2.22438626405678   | 5.107513e-08 | 3.861280e-05         |
| 50 | trans_POS | CELL_CYCLE_CHECKPOINT_G0_0000075                               | 26538      | 7352      | 47        | 13.020725        | 31             | 2.389820              | 5.0729924027979301 | 5.235856e-08 | 1.727786e-04         |
| 51 | trans_POS | CHROMOSOME                                                     | 26538      | 7352      | 122       | 33.798478        | 62             | 1.834402              | 2.710930538882558  | 5.263015e-08 | 4.905130e-05         |
| 52 | cis_NEG   | BIOCARTA_TCYTOTXIC_PATHWAY                                     | 26538      | 4004      | 13        | 1.961414         | 11             | 5.608199              | 31.028218199725501 | 5.284656e-08 | 4.587081e-05         |
| 53 | cis_NEG   | BIOCARTA_THIELPER_PATHWAY                                      | 26538      | 4004      | 13        | 1.961414         | 11             | 5.608199              | 31.028218199725501 | 5.284656e-08 | 4.587081e-05         |
| 54 | cis_NEG   | HALLMARK_APOPTOSIS                                             | 26538      | 4004      | 159       | 23.989600        | 51             | 2.125921              | 2.6787350309022302 | 5.558981e-08 | 1.111792e-05         |
| 55 | trans_POS | BIOCARTA_TCYTOTXIC_PATHWAY                                     | 26538      | 7352      | 13        | 3.601477         | 13             | 3.609630              | inf                | 5.618902e-08 | 4.877207e-05         |
| 56 | trans_POS | BIOCARTA_THIELPER_PATHWAY                                      | 26538      | 7352      | 13        | 3.601477         | 13             | 3.609630              | inf                | 5.618902e-08 | 4.877207e-05         |
| 57 | cis_NEG   | INTERCELLULAR_JUNCTION                                         | 26538      | 4004      | 65        | 9.807069         | 28             | 2.855083              | 4.28175548824108   | 5.703032e-08 | 5.312682e-05         |
| 58 | cis_NEG   | BIOCARTA_TGFR_PATHWAY                                          | 26538      | 4004      | 11        | 1.659568         | 10             | 6.025338              | 56.41348067557578  | 5.748824e-08 | 4.989979e-05         |
| 59 | trans_NEG | KEGG_ALLOGRAFT_REJECTION                                       | 26538      | 8266      | 32        | 9.967292         | 25             | 2.508204              | 7.9148331992689904 | 5.955541e-08 | 4.430922e-05         |
| 60 | trans_NEG | REACTOME_E2F_MEDIATED_REGULATION_OF_DNA_REPLICATION            | 26538      | 8266      | 32        | 9.967292         | 25             | 2.508204              | 7.9148331992689904 | 5.955541e-08 | 1.606614e-04         |
| 61 | trans_NEG | INTRACELLULAR_ORGANELLE_PART                                   | 26538      | 8266      | 1172      | 365.05076        | 449            | 1.229962              | 1.394139820205993  | 5.975326e-08 | 5.569004e-05         |
| 62 | trans_POS | MITOSIS                                                        | 26538      | 7352      | 82        | 22.717070        | 46             | 2.024914              | 3.3498628435036001 | 5.976665e-08 | 1.972299e-04         |
| 63 | trans_NEG | REGULATION_OF_PROGRAMMED_CELL_DEATH                            | 26538      | 8266      | 333       | 103.722134       | 150            | 1.446172              | 1.8269472589937    | 6.049123e-08 | 1.996211e-04         |
| 64 | cis_NEG   | HALLMARK_TNFA_SIGNALING_VIA_NFKB                               | 26538      | 4004      | 200       | 30.175997        | 60             | 1.988362              | 2.4333100253283901 | 6.125372e-08 | 1.225074e-05         |
| 65 | cis_NEG   | NUCLEUS                                                        | 26538      | 4004      | 1404      | 211.832693       | 284            | 1.340881              | 1.4595488029911099 | 6.140436e-08 | 5.722886e-05         |
| 66 | cis_POS   | ION_TRANSPORT                                                  | 26538      | 1529      | 183       | 10.543636        | 31             | 2.940162              | 3.3839053867347801 | 6.227725e-08 | 2.055149e-04         |
| 67 | cis_NEG   | ESTABLISHMENT_OF_LOCALIZATION                                  | 26538      | 4004      | 857       | 129.302434       | 187            | 1.446222              | 1.59868794534171   | 6.244191e-08 | 2.060583e-04         |
| 68 | cis_NEG   | REACTOME_TCR_SIGNALING                                         | 26538      | 4004      | 51        | 7.694777         | 24             | 3.118999              | 5.0263616519903968 | 6.377114e-08 | 1.719270e-04         |
| 69 | trans_POS | KEGG_CYTOKINE_CYTOKINE_RECEPTOR_INTERACTION                    | 26538      | 7352      | 260       | 72.025543        | 112            | 1.554918              | 1.989597406267999  | 6.661485e-08 | 4.956145e-05         |
| 70 | trans_NEG | KEGG_FOCAL_ADHESION                                            | 26538      | 8266      | 199       | 61.984098        | 98             | 1.581051              | 2.1588529461725601 | 7.006534e-08 | 5.215093e-05         |
| 71 | cis_NEG   | KEGG_ADHERENS_JUNCTION                                         | 26538      | 4004      | 73        | 11.014093        | 30             | 2.723783              | 3.94830271860075   | 7.048733e-08 | 5.244257e-05         |
| 72 | cis_NEG   | KEGG_ENDOCYTOSIS                                               | 26538      | 4004      | 178       | 26.856282        | 55             | 2.047938              | 2.5375203236685    | 7.154149e-08 | 5.322887e-05         |
| 73 | cis_NEG   | NEGATIVE_REGULATION_OF_APOPTOSIS                               | 26538      | 4004      | 147       | 22.179064        | 48             | 2.164203              | 2.7497007700132499 | 7.286789e-08 | 2.404640e-04         |
| 74 | trans_NEG | NEGATIVE_REGULATION_OF_BIOLOGICAL_PROCESS                      | 26538      | 8266      | 665       | 207.132791       | 271            | 1.308339              | 1.5380401558082699 | 7.305071e-08 | 2.410881e-04         |
| 75 | cis_POS   | LTE2_UP.V1_DN                                                  | 26538      | 1529      | 194       | 11.177406        | 32             | 2.862918              | 3.2783273330761298 | 7.308303e-08 | 5.520077e-05         |
| 76 | trans_POS | POSITIVE_REGULATION_OF_CELL_PROLIFERATION                      | 26538      | 7352      | 144       | 39.893285        | 70             | 1.754681              | 2.4822974938216899 | 7.551126e-08 | 2.491872e-04         |
| 77 | trans_POS | REGULATION_OF_CELL_PROLIFERATION                               | 26538      | 7352      | 301       | 83.368047        | 126            | 1.511008              | 1.8943166233676201 | 7.708773e-08 | 2.543895e-04         |
| 78 | trans_POS | AKT_UP_MTOR_DN.V1_DN                                           | 26538      | 7352      | 182       | 50.420680        | 84             | 1.665983              | 2.25107302480406   | 7.830846e-08 | 5.920120e-05         |
| 79 | cis_NEG   | E2F3_UP.V1_UP                                                  | 26538      | 4004      | 183       | 27.610671        | 56             | 2.028201              | 2.5024781770493698 | 7.901123e-08 | 5.973249e-05         |
| 80 | cis_NEG   | BM11_DN_MEL18_DN.V1_UP                                         | 26538      | 4004      | 143       | 21.575552        | 47             | 2.178392              | 2.77615845765731   | 7.931839e-08 | 5.996470e-05         |
| 81 | trans_NEG | MITOSIS                                                        | 26538      | 8266      | 82        | 25.541186        | 49             | 1.918470              | 3.2957021839988401 | 8.185899e-08 | 2.707347e-04         |
| 82 | trans_POS | REACTOME_TELOMERE_MAINTENANCE                                  | 26538      | 7352      | 73        | 20.223679        | 42             | 2.076773              | 3.550226566628499  | 8.412059e-08 | 2.267891e-04         |
| 83 | cis_POS   | CELL_CELL_SIGNALING                                            | 26538      | 1529      | 399       | 22.988582        | 51             | 2.218493              |                    |              |                      |

|    | set1_Name | set2_Name                                                                 | Background | set1_size | set2_size | expected_overlap | actual_overlap | enrichment.foldchange | odds.ratio          | FET_pvalue   | corrected.FET.pvalue |
|----|-----------|---------------------------------------------------------------------------|------------|-----------|-----------|------------------|----------------|-----------------------|---------------------|--------------|----------------------|
| 1  | cis_NEG   | REGULATION_OF_I_KAPPA_B_KINASE_NF_KAPPA_B_CASCADE                         | 26538      | 4004      | 90        | 13.579019        | 34             | 2.503863              | 3.4374022285321502  | 1.152824e-07 | 3.804319e-04         |
| 2  | cis_POS   | ERB2_UP_V1_UP                                                             | 26538      | 1529      | 188       | 10.831713        | 31             | 2.861967              | 3.27549381525023    | 1.171983e-07 | 8.857166e-05         |
| 3  | cis_NEG   | PTEN_DN_V1_DN                                                             | 26538      | 4004      | 176       | 26.554526        | 54             | 2.033552              | 2.5112882114856301  | 1.213071e-07 | 9.170820e-05         |
| 4  | trans_NEG | STK33_SKM_DN                                                              | 26538      | 8266      | 265       | 82.541638        | 123            | 1.490157              | 1.9265798256204899  | 1.231030e-07 | 9.306585e-05         |
| 5  | trans_POS | HALLMARK_IL6_AK_STAT3_SIGNALING                                           | 26538      | 7352      | 86        | 23.829156        | 47             | 1.972705              | 3.1585223672731799  | 1.268677e-07 | 2.537354e-05         |
| 6  | cis_NEG   | KRAS_PROSTATE_UP_V1_UP                                                    | 26538      | 4004      | 132       | 19.915894        | 44             | 2.295291              | 2.8339379239291498  | 1.286632e-07 | 9.726940e-05         |
| 7  | cis_NEG   | JNK_DN_V1_DN                                                              | 26538      | 4004      | 181       | 27.308916        | 55             | 2.013994              | 2.4769622399312099  | 1.332537e-07 | 1.007398e-04         |
| 8  | cis_NEG   | REACTOME_PDI_SIGNALING                                                    | 26538      | 4004      | 16        | 2.414048         | 12             | 4.970904              | 16.828360365289501  | 1.374264e-07 | 3.705017e-04         |
| 9  | trans_NEG | EXTRACELLULAR_MATRIX                                                      | 26538      | 8266      | 99        | 30.836310        | 56             | 1.816041              | 2.8914789936368699  | 1.420919e-07 | 1.323457e-04         |
| 10 | cis_POS   | METAL_ION_TRANSPORT                                                       | 26538      | 1529      | 115       | 6.625782         | 23             | 3.471288              | 4.1360409709108499  | 1.429747e-07 | 4.718164e-04         |
| 11 | cis_POS   | KEGG_ARRHYTHMOGENIC_RIGHT_VENTRICULAR_CARDIOMYOPATHY_ARVC                 | 26538      | 1529      | 74        | 4.262547         | 18             | 4.221837              | 5.3071098095398996  | 1.464671e-07 | 1.089715e-04         |
| 12 | cis_NEG   | HALLMARK_HYPOXIA                                                          | 26538      | 4004      | 200       | 30.175597        | 59             | 1.955222              | 2.37520867614245    | 1.503000e-07 | 3.006000e-05         |
| 13 | trans_NEG | STK33_DN                                                                  | 26538      | 8266      | 271       | 84.410506        | 125            | 1.480858              | 1.9062917621734099  | 1.505127e-07 | 1.137876e-04         |
| 14 | cis_POS   | KEGG_DILATED_CARDIOMYOPATHY                                               | 26538      | 1529      | 90        | 5.185395         | 20             | 3.856987              | 4.7214123338957004  | 1.513080e-07 | 1.125732e-04         |
| 15 | trans_NEG | NEGATIVE_REGULATION_OF_CELLULAR_PROCESS                                   | 26538      | 8266      | 636       | 198.099932       | 259            | 1.307421              | 1.53537514004047    | 1.513782e-07 | 4.995482e-04         |
| 16 | trans_NEG | HALLMARK_MTORC1_SIGNALING                                                 | 26538      | 8266      | 199       | 61.984098        | 97             | 1.564917              | 2.1152140457786202  | 1.522872e-07 | 3.045744e-05         |
| 17 | trans_NEG | MEK_UP_V1_UP                                                              | 26538      | 8266      | 194       | 60.426709        | 95             | 1.572152              | 2.1342030717335301  | 1.546979e-07 | 1.169513e-04         |
| 18 | cis_NEG   | NOTCH_DN_V1_DN                                                            | 26538      | 4004      | 182       | 27.459794        | 55             | 2.002928              | 2.4570968754937499  | 1.631677e-07 | 1.233548e-04         |
| 19 | trans_POS | REACTOME_DEPOSITION_OF_NEW_CENPA_CONTAINING_NUCLEOSOMES_AT_THE_CENTROMERE | 26538      | 7352      | 60        | 16.622252        | 36             | 2.169778              | 3.92653216263233    | 1.633676e-07 | 4.404389e-04         |
| 20 | cis_POS   | PTEN_DN_V1_UP                                                             | 26538      | 1529      | 181       | 10.428405        | 30             | 2.876758              | 3.2943808303697302  | 1.659010e-07 | 1.254212e-04         |
| 21 | trans_POS | NON_MEMBRANE_BOUND_ORGANELLE                                              | 26538      | 7352      | 623       | 172.593865       | 231            | 1.338402              | 1.5552355765214601  | 1.663779e-07 | 1.550639e-04         |
| 22 | trans_POS | INTRACELLULAR_NON_MEMBRANE_BOUND_ORGANELLE                                | 26538      | 7352      | 623       | 172.593865       | 231            | 1.338402              | 1.5552355765214601  | 1.663779e-07 | 1.550639e-04         |
| 23 | trans_NEG | E2F1_UP_V1_UP                                                             | 26538      | 8266      | 187       | 58.246364        | 92             | 1.579498              | 2.1535101295051199  | 1.837883e-07 | 1.389440e-04         |
| 24 | trans_NEG | ESC_I1_UP_LATE_V1_UP                                                      | 26538      | 8266      | 187       | 58.246364        | 92             | 1.579498              | 2.1535101295051199  | 1.837883e-07 | 1.389440e-04         |
| 25 | cis_NEG   | RESPONSE_TO_STRESS                                                        | 26538      | 4004      | 496       | 74.835481        | 118            | 1.578792              | 1.7797820899023001  | 1.854154e-07 | 6.118709e-04         |
| 26 | cis_POS   | KEGG_HYPERTROPHIC_CARDIOMYOPATHY_HCM                                      | 26538      | 1529      | 83        | 4.782086         | 19             | 3.973161              | 4.90372849304695    | 1.872353e-07 | 1.393031e-04         |
| 27 | trans_NEG | REACTOME_TCR_SIGNALING                                                    | 26538      | 8266      | 51        | 15.885372        | 34             | 2.140334              | 4.4348232512881696  | 1.920104e-07 | 5.176600e-04         |
| 28 | cis_NEG   | STK33_SKM_UP                                                              | 26538      | 4004      | 268       | 40.435300        | 73             | 1.805353              | 2.1273390666012388  | 1.938873e-07 | 1.465637e-04         |
| 29 | cis_NEG   | HALLMARK_CHOLESTEROL_HOMEOSTASIS                                          | 26538      | 4004      | 72        | 10.863215        | 29             | 2.669560              | 3.81571153585828    | 1.948833e-07 | 3.897695e-05         |
| 30 | cis_POS   | CATION_CHANNEL_ACTIVITY                                                   | 26538      | 1529      | 117       | 6.741013         | 23             | 3.411950              | 4.04769046663715436 | 1.986495e-07 | 3.146609e-04         |
| 31 | trans_NEG | CYTOSKELETON_ORGANIZATION_AND_BIOGENESIS                                  | 26538      | 8266      | 205       | 63.652966        | 99             | 1.550437              | 2.0774210983808999  | 2.008957e-07 | 6.629229e-04         |
| 32 | cis_NEG   | HEMOPOIETIC_OR_LYMPHOID_ORGAN_DEVELOPMENT                                 | 26538      | 4004      | 76        | 11.466727        | 30             | 2.616265              | 3.6902806221951598  | 2.048311e-07 | 6.759427e-04         |
| 33 | cis_POS   | KRAS_600_UP_V1_DN                                                         | 26538      | 1529      | 276       | 15.901877        | 39             | 2.452541              | 2.73581642623828    | 2.119116e-07 | 1.602052e-04         |
| 34 | trans_NEG | REACTOME_G_ALPHA_I_SIGNALING_EVENTS                                       | 26538      | 8266      | 180       | 59.180797        | 93             | 1.571456              | 2.1203635447199501  | 2.132645e-07 | 5.749611e-04         |
| 35 | trans_NEG | REGULATION_OF_CELL_CYCLE                                                  | 26538      | 8266      | 180       | 56.066019        | 89             | 1.587414              | 2.174536398947202   | 2.174586e-07 | 7.178132e-04         |
| 36 | trans_POS | STK33_SKM_DN                                                              | 26538      | 7352      | 265       | 73.414726        | 112            | 1.525579              | 1.9244621893663     | 2.201833e-07 | 1.664586e-04         |
| 37 | cis_NEG   | KRAS_KIDNEY_UP_V1_UP                                                      | 26538      | 4004      | 143       | 21.575552        | 46             | 2.130043              | 2.68801284808448    | 2.215817e-07 | 1.675009e-04         |
| 38 | trans_POS | TRANSMEMBRANE_RECEPTOR_ACTIVITY                                           | 26538      | 7352      | 410       | 113.585048       | 161            | 1.417440              | 1.70270216281622    | 2.218384e-07 | 3.513920e-04         |
| 39 | cis_POS   | CSR_LATE_UP_V1_DN                                                         | 26538      | 1529      | 164       | 9.448941         | 28             | 2.963295              | 3.4113760021277999  | 2.253135e-07 | 1.703370e-04         |
| 40 | trans_NEG | IDENTICAL_PROTEIN_BINDING                                                 | 26538      | 8266      | 299       | 93.131886        | 135            | 1.446557              | 1.83328237849871    | 2.289239e-07 | 3.626155e-04         |
| 41 | trans_NEG | REGULATION_OF_IMMUNE_SYSTEM_PROCESS                                       | 26538      | 8266      | 64        | 19.934584        | 40             | 2.006563              | 3.6970067082743698  | 2.29873e-07  | 7.582322e-04         |
| 42 | trans_POS | STK33_DN                                                                  | 26538      | 7352      | 271       | 75.076946        | 114            | 1.518442              | 1.9090373318642599  | 2.310782e-07 | 1.748951e-04         |
| 43 | cis_NEG   | KRAS_600_UP_V1_UP                                                         | 26538      | 4004      | 274       | 41.340568        | 74             | 1.790009              | 2.1026405322396799  | 2.317584e-07 | 1.752093e-04         |
| 44 | trans_POS | SYSTEM_DEVELOPMENT                                                        | 26538      | 7352      | 843       | 233.541940       | 300            | 1.284566              | 1.48055598158844    | 2.337754e-07 | 7.714589e-04         |
| 45 | cis_POS   | LEFT1_UP_V1_DN                                                            | 26538      | 1529      | 184       | 10.601251        | 30             | 2.828655              | 3.22682121262629    | 2.400834e-07 | 1.814879e-04         |
| 46 | cis_POS   | MEK_UP_V1_UP                                                              | 26538      | 1529      | 194       | 11.177406        | 31             | 2.773452              | 3.1541742152449102  | 2.416832e-07 | 1.827125e-04         |
| 47 | trans_POS | REACTOME_SYNTHESIS_OF_DNA                                                 | 26538      | 7352      | 90        | 24.933303        | 48             | 1.925136              | 2.9953173505636299  | 2.544766e-07 | 6.806769e-04         |
| 48 | trans_NEG | BIOCARTA_TCYTOTOXIC_PATHWAY                                               | 26538      | 8266      | 13        | 4.049212         | 13             | 3.210501              | Inf                 | 2.580657e-07 | 2.240010e-04         |
| 49 | trans_NEG | BIOCARTA_THELPER_PATHWAY                                                  | 26538      | 8266      | 13        | 4.049212         | 13             | 3.210501              | Inf                 | 2.580657e-07 | 2.240010e-04         |
| 50 | cis_POS   | NEUROGENESIS                                                              | 26538      | 1529      | 93        | 5.358241         | 20             | 3.732568              | 4.5268701514399104  | 2.674889e-07 | 8.827103e-04         |
| 51 | trans_POS | REGULATION_OF_T_CELL_ACTIVATION                                           | 26538      | 7352      | 28        | 7.757028         | 21             | 2.707723              | 7.847304313891602   | 2.683282e-07 | 8.854829e-04         |
| 52 | trans_NEG | REACTOME_PDI_SIGNALING                                                    | 26538      | 8266      | 16        | 4.983646         | 15             | 3.009845              | 33.212444025407102  | 2.831246e-07 | 7.633038e-04         |
| 53 | cis_NEG   | REACTOME_CELL_JUNCTION_ORGANIZATION                                       | 26538      | 4004      | 77        | 11.617605        | 30             | 2.582288              | 3.6115993497796999  | 2.873158e-07 | 7.746033e-04         |
| 54 | cis_POS   | PTEN_DN_V1_DN                                                             | 26538      | 1529      | 176       | 10.140327        | 29             | 2.859868              | 3.2695706020772599  | 3.012514e-07 | 2.277461e-04         |
| 55 | cis_NEG   | APICAL_CELL_COMPLEX                                                       | 26538      | 4004      | 34        | 5.129852         | 18             | 3.508873              | 6.3547393348463297  | 3.026652e-07 | 2.820849e-04         |
| 56 | cis_NEG   | APICOLATERAL_PLASMA_MEMBRANE                                              | 26538      | 4004      | 34        | 5.129852         | 18             | 3.508873              | 6.3547393348463297  | 3.026652e-07 | 2.820849e-04         |
| 57 | cis_POS   | KEGG_CHEMOKINE_SIGNALING_PATHWAY                                          | 26538      | 1529      | 186       | 10.716482        | 30             | 2.799426              | 3.1881610252252399  | 3.055098e-07 | 2.272933e-04         |
| 58 | cis_NEG   | AKT_UP_MTOR_DN_V1_UP                                                      | 26538      | 4004      | 176       | 26.554526        | 53             | 1.995893              | 2.4439971881186101  | 3.071591e-07 | 2.322123e-04         |
| 59 | trans_POS | REACTOME_G1_S_SPECIFIC_TRANSCRIPTION                                      | 26538      | 7352      | 17        | 4.709624         | 15             | 3.184968              | 19.610096949006801  | 3.210356e-07 | 8.655126e-04         |
| 60 | cis_NEG   | PROTEIN_TYROSINE_KINASE_ACTIVITY                                          | 26538      | 4004      | 62        | 9.354435         | 26             | 2.779430              | 4.084417158908798   | 3.211965e-07 | 5.087753e-04         |
| 61 | cis_POS   | CELL_SURFACE_RECEPTOR_LINKED_SIGNAL_TRANSDUCTION_GQ_0007166               | 26538      | 1529      | 635       | 36.585639        | 69             | 1.885976              | 2.0408617895963     | 3.235920e-07 | 1.067854e-03         |
| 62 | trans_NEG | CYTOSKELETON                                                              | 26538      | 8266      | 362       | 112.754993       | 158            | 1.401268              | 1.72590436758708    | 3.244550e-07 | 3.023920e-04         |
| 63 | trans_NEG | REACTOME_CYTOKINE_SIGNALING_IN_IMMUNE_SYSTEM                              | 26538      | 8266      | 261       | 81.295727        | 120            | 1.476092              | 1.8942978937189601  | 3.260770e-07 | 8.791036e-04         |
| 64 | cis_NEG   | ALK_DN_V1_DN                                                              | 26538      | 4004      | 136       | 20.519406        | 44             | 2.144312              | 2.7100759280337101  | 3.354694e-07 | 2.536148e-04         |
| 65 | cis_NEG   | BIOCARTA_TCAPOPTOSIS_PATHWAY                                              | 26538      | 4004      | 10        | 1.508780         | 9              | 5.965085              | 50.76415676117308   | 3.475874e-07 | 3.017059e-04         |
| 66 | trans_POS | KEGG_INTESTINAL_IMMUNE_NETWORK_FOR_IDGA_PRODUCTION                        | 26538      | 7352      | 43        | 11.912578        | 28             | 2.350457              | 4.8857919402851202  | 3.479758e-07 | 2.588940e-04         |
| 67 | cis_NEG   | IL2_UP_V1_DN                                                              | 26538      | 4004      | 186       | 28.063305        | 55             | 1.959855              | 3.28155579803631    | 3.584227e-07 | 2.709675e-04         |
| 68 | cis_NEG   | REACTOME_CLASS_II_RHODOPSIN_LIKE_RECEPTORS                                | 26538      | 8266      | 293       | 91.263019        | 132            | 1.446369              | 1.8253720653940999  | 3.603809e-07 | 9.715899e-04         |
| 69 | trans_POS | REGULATION_OF_MULTICELLULAR_ORGANISMAL_PROCESS                            | 26538      | 7352      | 146       | 40.447359        | 69             | 1.705921              | 2.35111363442764    | 3.634149e-07 | 1.199269e-03         |
| 70 | trans_NEG | PTEN_DN_V2_UP                                                             | 26538      | 8266      | 137       | 42.672470        | 71             | 1.663836              | 2.3898342123114502  | 3.685320e-07 | 2.768598e-04         |
| 71 | cis_NEG   | HALLMARK_ANDROGEN_RESPONSE                                                | 26538      | 4004      | 98        | 14.786043        | 35             | 2.367097              | 3.14515860267417    | 3.737046e-07 | 7.747493e-05         |
| 72 | cis_NEG   | REGULATION_OF_TRANSCRIPTION_FROM_RNA_POLYMERASE_II_PROMOTER               | 26538      | 4004      | 287       | 43.301982        | 76             | 1.755116              | 2.0469455155502101  | 3.767188e-07 | 1.243172e-03         |
| 73 | cis_NEG   | HEMOPOIESIS                                                               | 26538      | 4004      | 74        | 11.164971        | 29             | 2.597409              | 3.64578603860652    | 3.868978e-07 | 1.286663e-03         |
| 74 | trans_POS | BIOPOLYMER_METABOLIC_PROCESS                                              | 26538      | 7352      | 1660      | 459.880925       | 549            | 1.193787              | 1.3129170011020099  | 3.913881e-07 | 1.291581e-03         |
| 75 | trans_POS | HALLMARK_COMPLEMENT                                                       | 26538      | 7352      | 196       | 54.299194        | 87             | 1.602234              | 2.095675589437301   | 3.941879e-07 | 7.883755e-05         |
| 76 | trans_NEG | JNK_DN_V1_UP                                                              | 26538      | 8266      | 187       | 58.246364        | 91             | 1.562329              | 2.1075495574126499  | 3.985332e-07 | 3.012911e-04         |
| 77 | cis_NEG   | BIOCARTA_NG2L12_PATHWAY                                                   | 26538      | 4004      | 17        | 2.564926         | 12             | 4.678498              | 13.541932217516299  | 4.025886e-07 | 3.494469e-04         |
| 78 | trans_POS | HALLMARK_MTORC1_SIGNALING                                                 | 26538      | 7352      | 199       | 55.130304        | 88             | 1.596218              | 2.08184083552359    | 4.144036e-07 | 8.288072e-05         |
| 79 | trans_NEG | KEGG_VIRAL_MYOCARDITIS                                                    | 26538      | 8266      | 65        | 20.246062        | 40             | 1.975693              | 3.5489070319753799  | 4.177460e-07 | 3.108030e-04         |
| 80 | cis_POS   | HALLMARK_ESTROGEN_RESPONSE_LATE                                           | 26538      | 1529      | 199       | 11.465483        | 31             | 2.703767              | 3.0596943758442201  | 4.301933e-07 | 8.603866e-05         |
| 81 | cis_NEG   | MTOR_UP_V1_UP                                                             | 26538      | 4004      | 164       | 24.743990        | 50             | 2.020693              | 2.4869293336417401  | 4.330314e-07 | 3.273717e-04         |
| 82 | trans_NEG | REACTOME_CELL_CYCLE_CHECKPOINTS                                           | 26538      | 8266      | 111       | 34.574045        | 60             | 1.736408              | 2.6121946207375499  | 4.480757e-07 | 1.208012e-03         |
| 83 | trans_NEG | REACTOME_SYNTHESIS_OF_DNA                                                 | 26538      | 8266      | 90        | 28.033009        |                |                       |                     |              |                      |

|    | set1_Name | set2_Name                                                                             | Background | set1_size | set2_size | expected_overlap | actual_overlap | enrichment_foldchange | odds_ratio         | FET_pvalue   | corrected_FET_pvalue |
|----|-----------|---------------------------------------------------------------------------------------|------------|-----------|-----------|------------------|----------------|-----------------------|--------------------|--------------|----------------------|
| 1  | chr_NEG   | TGFB_UP_V1_DN                                                                         | 26538      | 4004      | 189       | 28.51939         | 55             | 1.928746              | 2.326063794711801  | 6.317161e-07 | 0.0004775774         |
| 2  | trans_POS | KEGG_GRAFT_VERSUS_HOST_DISEASE                                                        | 26538      | 7362      | 33        | 9.142211         | 23             | 2.515803              | 6.016300595008496  | 6.338180e-07 | 0.0004716606         |
| 3  | chr_NEG   | ANTI_APOPTOSIS                                                                        | 26538      | 4004      | 117       | 17.652724        | 39             | 2.209291              | 2.83162530420651   | 6.502990e-07 | 0.0021468548         |
| 4  | trans_POS | CELL_DEVELOPMENT                                                                      | 26538      | 7362      | 567       | 157.078810       | 210            | 1.336900              | 1.55078136478997   | 6.531279e-07 | 0.0021553219         |
| 5  | trans_NEG | KEGG_LEISHMANIA_INFECTION                                                             | 26538      | 8266      | 68        | 21.180498        | 41             | 1.935743              | 3.385537854935399  | 6.573543e-07 | 0.0004890716         |
| 6  | chr_NEG   | REACTOME_ANTIGEN_ACTIVATES_B_CELL_RECEPTOR_LEADING_TO_GENERATION_OF_SECOND_MESSENGERS | 26538      | 4004      | 29        | 4.375462         | 16             | 3.656757              | 6.9495723182187801 | 6.611076e-07 | 0.0017823460         |
| 7  | trans_POS | POSITIVE_REGULATION_OF_LYMPHOCYTE_ACTIVATION                                          | 26538      | 7362      | 23        | 6.371844         | 18             | 2.624928              | 9.4140819798165207 | 6.728614e-07 | 0.0022204425         |
| 8  | trans_NEG | REACTOME_GPCR_LIGAND_BINDING                                                          | 26538      | 8266      | 393       | 122.418007       | 168            | 1.372428              | 1.8638736862853699 | 7.062099e-07 | 0.0019309419         |
| 9  | chr_NEG   | MUSCLE_DEVELOPMENT                                                                    | 26538      | 4004      | 92        | 13.880775        | 33             | 2.377389              | 3.1654491540904202 | 7.104719e-07 | 0.0023445571         |
| 10 | trans_POS | REACTOME_EXTENSION_OF_TELOMERES                                                       | 26538      | 7362      | 27        | 7.478991         | 20             | 2.673800              | 7.4725087271975701 | 7.322283e-07 | 0.0018740874         |
| 11 | trans_POS | BIOCARTA_TORA_PATHWAY                                                                 | 26538      | 7362      | 11        | 3.047404         | 11             | 3.609630              | inf                | 7.337703e-07 | 0.0006399126         |
| 12 | trans_POS | REACTOME_UNWINDING_OF_DNA                                                             | 26538      | 7362      | 11        | 3.047404         | 11             | 3.609630              | inf                | 7.337703e-07 | 0.0019782446         |
| 13 | chr_NEG   | KEGG_SMALL_CELL_LUNG_CANCER                                                           | 26538      | 4004      | 84        | 12.673751        | 31             | 2.446000              | 3.3094482550576698 | 7.485910e-07 | 0.0005569517         |
| 14 | chr_NEG   | REGULATION_OF_MOLECULAR_FUNCTION                                                      | 26538      | 4004      | 317       | 47.826322        | 81             | 1.693557              | 1.9508671552734    | 7.756131e-07 | 0.0025595231         |
| 15 | chr_NEG   | PROTEIN_KINASE_ACTIVITY                                                               | 26538      | 4004      | 282       | 42.547592        | 74             | 1.739229              | 2.02108096278433   | 7.760946e-07 | 0.0012203339         |
| 16 | chr_NEG   | CELL_FRACTION                                                                         | 26538      | 4004      | 488       | 73.628457        | 114            | 1.548314              | 1.7363680880930601 | 7.845678e-07 | 0.0007312172         |
| 17 | chr_NEG   | LEADING_EDGE                                                                          | 26538      | 4004      | 46        | 6.940387         | 21             | 3.025768              | 4.746387465420303  | 7.956222e-07 | 0.0007415198         |
| 18 | chr_NEG   | RNA_POLYMERASE_II_TRANSCRIPTION_FACTOR_ACTIVITY                                       | 26538      | 4004      | 181       | 27.308916        | 53             | 1.940758              | 2.3480370361641598 | 8.104201e-07 | 0.0012837449         |
| 19 | chr_POS   | CATION_TRANSPORT                                                                      | 26538      | 1529      | 145       | 8.354247         | 25             | 2.962490              | 3.4473160153455198 | 8.147790e-07 | 0.0026887709         |
| 20 | chr_POS   | ION_CHANNEL_ACTIVITY                                                                  | 26538      | 1529      | 145       | 8.354247         | 25             | 2.962490              | 3.4473160153455198 | 8.147790e-07 | 0.0012961000         |
| 21 | trans_NEG | REACTOME_TRANSLLOCATION_OF_ZAP_70_TO_IMMUNOLOGICAL_SYNAPSE                            | 26538      | 8266      | 12        | 3.737735         | 12             | 3.210501              | inf                | 8.293494e-07 | 0.0022359260         |
| 22 | trans_NEG | CAHOY_OXIDOREDUCTIC                                                                   | 26538      | 8266      | 96        | 29.901877        | 53             | 1.772464              | 2.7355880087033699 | 8.608631e-07 | 0.0006508125         |
| 23 | chr_NEG   | TRANSCRIPTION_FACTOR_BINDING                                                          | 26538      | 4004      | 303       | 45.716030        | 78             | 1.706185              | 1.9699076847771699 | 9.003448e-07 | 0.0014261462         |
| 24 | trans_NEG | CYTOKINE_BINDING                                                                      | 26538      | 8266      | 47        | 14.638460        | 31             | 2.177654              | 4.2949073788694499 | 9.511334e-07 | 0.0015065853         |
| 25 | chr_NEG   | REACTOME_METABOLISM_OF_VITAMINS_AND_COFACTORS                                         | 26538      | 4004      | 50        | 7.543899         | 22             | 2.916264              | 4.4049606267353899 | 9.545302e-07 | 0.0025734135         |
| 26 | chr_NEG   | REACTOME_SEMAPHORIN_INTERACTIONS                                                      | 26538      | 4004      | 65        | 9.807069         | 26             | 2.651149              | 3.7696730387403101 | 9.658156e-07 | 0.0026038387         |
| 27 | chr_NEG   | POSITIVE_REGULATION_OF_SIGNAL_TRANSDUCTION                                            | 26538      | 4004      | 123       | 18.557992        | 40             | 2.155406              | 2.7291562321500698 | 9.688749e-07 | 0.0031976171         |
| 28 | trans_POS | REACTOME_PD1_SIGNALING                                                                | 26538      | 7362      | 16        | 4.432587         | 14             | 3.158426              | 18.30026184763901  | 1.027080e-06 | 0.0027690069         |
| 29 | trans_POS | REGULATION_OF_DEVELOPMENTAL_PROCESS                                                   | 26538      | 7362      | 431       | 119.402819       | 165            | 1.381877              | 1.63262759348218   | 1.029322e-06 | 0.0033967640         |
| 30 | chr_NEG   | JNK_DN_V1_UP                                                                          | 26538      | 4004      | 187       | 28.214183        | 54             | 1.913931              | 2.3024742280919099 | 1.035740e-06 | 0.0007830196         |
| 31 | trans_NEG | ORGAN_DEVELOPMENT                                                                     | 26538      | 8266      | 567       | 176.607958       | 230            | 1.302320              | 1.5231897904980701 | 1.038840e-06 | 0.0034281707         |
| 32 | chr_POS   | GATED_CHANNEL_ACTIVITY                                                                | 26538      | 1529      | 119       | 6.856244         | 22             | 3.208754              | 3.7487112481672902 | 1.091232e-06 | 0.0017285120         |
| 33 | chr_POS   | JNK_DN_V1_UP                                                                          | 26538      | 1529      | 187       | 10.740098        | 29             | 2.691641              | 3.0406201580990202 | 1.101151e-06 | 0.0008324700         |
| 34 | trans_POS | ESC_J1_UP_LATE_V1_DN                                                                  | 26538      | 7362      | 183       | 50.687716        | 81             | 1.597705              | 2.084294653342759  | 1.118317e-06 | 0.0008454475         |
| 35 | trans_NEG | KEGG_TYPE_1_DIABETES_MELLITUS                                                         | 26538      | 8266      | 37        | 11.524682        | 26             | 2.256028              | 5.2374827730446498 | 1.138593e-06 | 0.0008471135         |
| 36 | trans_NEG | BASEMENT_MEMBRANE                                                                     | 26538      | 8266      | 37        | 11.524682        | 26             | 2.256028              | 5.2374827730446498 | 1.138593e-06 | 0.0010611660         |
| 37 | chr_NEG   | BMI1_DN_V1_UP                                                                         | 26538      | 4004      | 137       | 20.676284        | 43             | 2.080321              | 2.5913862929638198 | 1.141559e-06 | 0.0008630175         |
| 38 | trans_NEG | IL2_UP_V1_UP                                                                          | 26538      | 8266      | 183       | 57.000452        | 88             | 1.543847              | 2.0588918314483101 | 1.165279e-06 | 0.0008809507         |
| 39 | trans_NEG | REACTOME_SIGNALING_BY_RHO_GTPASES                                                     | 26538      | 8266      | 111       | 34.574045        | 59             | 1.706482              | 2.5186239549236902 | 1.172340e-06 | 0.0031606286         |
| 40 | chr_NEG   | KEGG_AUTOIMMUNE_THYROID_DISEASE                                                       | 26538      | 4004      | 47        | 7.091285         | 21             | 2.961390              | 4.5641260747185903 | 1.233961e-06 | 0.0009180673         |
| 41 | chr_NEG   | HALLMARK_BILE_ACID_METABOLISM                                                         | 26538      | 4004      | 111       | 16.747456        | 37             | 2.209291              | 2.8307018886361099 | 1.244912e-06 | 0.0002489824         |
| 42 | chr_NEG   | CRX_DN_V1_UP                                                                          | 26538      | 4004      | 133       | 20.068772        | 42             | 2.093012              | 2.6142376732592001 | 1.264165e-06 | 0.0009557084         |
| 43 | trans_POS | MTOR_UP_V1_UP                                                                         | 26538      | 7362      | 164       | 45.434019        | 74             | 1.628736              | 2.1573200428996199 | 1.319779e-06 | 0.0009975933         |
| 44 | chr_POS   | HALLMARK_KRAS_SIGNALING_DN                                                            | 26538      | 1529      | 199       | 11.465483        | 30             | 2.616549              | 2.94140483839635   | 1.330474e-06 | 0.0002660947         |
| 45 | trans_POS | MEL18_DN_V1_DN                                                                        | 26538      | 7362      | 142       | 39.339212        | 66             | 1.677715              | 2.2776782828722399 | 1.354111e-06 | 0.0010237081         |
| 46 | chr_NEG   | ACTIN_BINDING                                                                         | 26538      | 4004      | 74        | 11.164971        | 28             | 2.507844              | 3.442235974078401  | 1.418333e-06 | 0.0002466398         |
| 47 | trans_POS | RB1_DN_V1_UP                                                                          | 26538      | 7362      | 134       | 37.122918        | 63             | 1.697065              | 2.3288955322194    | 1.433263e-06 | 0.0010835468         |
| 48 | trans_NEG | KEGG_ANTIGEN_PROCESSING_AND_PRESENTATION                                              | 26538      | 8266      | 74        | 23.048363        | 43             | 1.865561              | 3.0768373315001488 | 1.458651e-06 | 0.0010833019         |
| 49 | trans_POS | RESPONSE_TO_WOUNDING                                                                  | 26538      | 7362      | 184       | 50.974753        | 81             | 1.589022              | 2.0639566201352499 | 1.458821e-06 | 0.0004814105         |
| 50 | trans_POS | E2F3_UP_V1_DN                                                                         | 26538      | 7362      | 184       | 50.974753        | 81             | 1.589022              | 2.0639566201352499 | 1.458821e-06 | 0.0011028889         |
| 51 | trans_POS | DNA_REPLICATION                                                                       | 26538      | 7362      | 102       | 28.257744        | 51             | 1.804815              | 2.6207676318246502 | 1.495233e-06 | 0.0048154681         |
| 52 | chr_POS   | CENTRAL_NERVOUS_SYSTEM_DEVELOPMENT                                                    | 26538      | 1529      | 121       | 6.971475         | 22             | 3.155717              | 3.6726511449251302 | 1.462078e-06 | 0.0004824859         |
| 53 | trans_NEG | DNA_REPLICATION                                                                       | 26538      | 8266      | 102       | 31.770744        | 55             | 1.731352              | 2.597289106723338  | 1.473455e-06 | 0.0048624012         |
| 54 | chr_POS   | KRAS_BREAST_UP_V1_DN                                                                  | 26538      | 1529      | 140       | 8.066189         | 24             | 2.975390              | 3.421817464628     | 1.482774e-06 | 0.0011285370         |
| 55 | chr_POS   | SKELETAL_DEVELOPMENT                                                                  | 26538      | 1529      | 103       | 5.934396         | 20             | 3.370183              | 3.9802308404849701 | 1.494275e-06 | 0.0049311067         |
| 56 | trans_NEG | KOIAS_DN_V1_UP                                                                        | 26538      | 8266      | 189       | 58.869319        | 90             | 1.538810              | 2.020663856160401  | 1.501657e-06 | 0.0011352528         |
| 57 | trans_NEG | TRANSFERASE_ACTIVITY_TRANSFERRING_PHOSPHORUS_CONTAINING_GROUPS                        | 26538      | 8266      | 419       | 130.509232       | 176            | 1.348564              | 1.6140684627862001 | 1.506751e-06 | 0.0023886936         |
| 58 | trans_NEG | REGULATION_OF_MULTICELLULAR_ORGANISMAL_PROCESS                                        | 26538      | 8266      | 146       | 45.475771        | 73             | 1.605250              | 2.2212487134956    | 1.507592e-06 | 0.0049750552         |
| 59 | trans_POS | JNK_DN_V1_UP                                                                          | 26538      | 7362      | 187       | 51.805863        | 82             | 1.582832              | 2.040710717006301  | 1.526232e-06 | 0.0011538311         |
| 60 | chr_NEG   | CAHOY_ASTROCYTIC                                                                      | 26538      | 4004      | 99        | 14.936821        | 34             | 2.276239              | 2.9602891011189398 | 1.537429e-06 | 0.0011622691         |
| 61 | trans_POS | HALLMARK_APOPTOSIS                                                                    | 26538      | 7362      | 159       | 44.048836        | 72             | 1.634549              | 2.17113504723687   | 1.549373e-06 | 0.0003008746         |
| 62 | trans_POS | REACTOME_INTEGRIN_CELL_SURFACE_INTERACTIONS                                           | 26538      | 7362      | 79        | 21.885899        | 42             | 1.919044              | 2.8734142485639699 | 1.555099e-06 | 0.0041925212         |
| 63 | trans_NEG | PROTEIN_OLIGOMERIZATION_ACTIVITY                                                      | 26538      | 8266      | 179       | 55.754541        | 86             | 1.542475              | 2.0550943961384001 | 1.604372e-06 | 0.0025413253         |
| 64 | trans_POS | KEGG_ALLOGRAFT_REJECTION                                                              | 26538      | 7362      | 32        | 8.865174         | 22             | 2.481621              | 5.7549897149627602 | 1.609890e-06 | 0.0011977581         |
| 65 | chr_NEG   | REACTOME_CD28_DEPENDENT_VAV1_PATHWAY                                                  | 26538      | 4004      | 11        | 1.659658         | 9              | 5.422804              | 25.37256948631102  | 1.653034e-06 | 0.0045655791         |
| 66 | trans_NEG | ERB2_UP_V1_DN                                                                         | 26538      | 8266      | 192       | 59.803753        | 91             | 1.521644              | 2.0026884864608099 | 1.694640e-06 | 0.0012811481         |
| 67 | trans_NEG | INTERLEUKIN_BINDING                                                                   | 26538      | 8266      | 24        | 7.475489         | 19             | 2.541647              | 8.4161844794729905 | 1.733314e-06 | 0.0027455666         |
| 68 | chr_NEG   | KRAS_LUNG_BREAST_UP_V1_DN                                                             | 26538      | 4004      | 139       | 20.972040        | 43             | 2.050349              | 2.5371986410714299 | 1.758159e-06 | 0.0013276542         |
| 69 | chr_POS   | BIOPOLYMER_MODIFICATION                                                               | 26538      | 1529      | 641       | 36.931532        | 67             | 1.814168              | 1.95082210260795   | 1.885191e-06 | 0.0062711292         |
| 70 | trans_NEG | STK33_UP                                                                              | 26538      | 8266      | 279       | 86.302329        | 124            | 1.426889              | 1.7799787152012001 | 1.888350e-06 | 0.0014275924         |
| 71 | trans_POS | CHROMOSOME                                                                            | 26538      | 8266      | 122       | 38.000301        | 63             | 1.657882              | 2.37074893522691   | 1.915001e-06 | 0.0017853398         |
| 72 | trans_POS | KEGG_LEUKOCYTE_TRANSENDOHELIAL_MIGRATION                                              | 26538      | 7362      | 116       | 32.136257        | 56             | 1.742580              | 2.4465910456272001 | 1.916735e-06 | 0.0014260507         |
| 73 | chr_NEG   | KEGG_NEUROTROPHIN_SIGNALING_PATHWAY                                                   | 26538      | 4004      | 126       | 19.010626        | 40             | 2.104066              | 2.6337428584686    | 1.929188e-06 | 0.0014353155         |
| 74 | chr_POS   | SUBSTRATE_SPECIFIC_CHANNEL_ACTIVITY                                                   | 26538      | 1529      | 152       | 8.757555         | 25             | 2.854678              | 3.25641012451627   | 1.998283e-06 | 0.0031652804         |
| 75 | chr_POS   | ACTIN_FILAMENT_BASED_PROCESS                                                          | 26538      | 4004      | 113       | 17.049212        | 37             | 2.170168              | 2.75616453076035   | 2.023909e-06 | 0.0066769884         |
| 76 | chr_NEG   | STK33_NOMO_UP                                                                         | 26538      | 4004      | 284       | 42.849348        | 73             | 1.703643              | 1.96469372359848   | 2.100151e-06 | 0.0015877142         |
| 77 | chr_NEG   | REACTOME_CD28_CO_STIMULATION                                                          | 26538      | 4004      | 31        | 4.677218         | 16             | 3.420837              | 6.0225207356274097 | 2.163493e-06 | 0.0058327779         |
| 78 | chr_NEG   | TIGHT_JUNCTION                                                                        | 26538      | 4004      | 31        | 4.677218         | 16             | 3.420837              | 6.0225207356274097 | 2.163493e-06 | 0.0020163758         |
| 79 | chr_NEG   | MEMBRANE_FRACTION                                                                     | 26538      | 4004      | 335       | 50.544125        | 83             | 1.642130              | 1.87188185264348   | 2.171490e-06 | 0.0020238285         |
| 80 | chr_NEG   | TRANSPORT                                                                             | 26538      | 4004      | 783       | 118.137463       | 166            | 1.405143              | 1.53634928728929   | 2.185929e-06 | 0.0072135668         |
| 81 | chr_POS   | E2F3_UP_V1_UP                                                                         | 26538      | 1529      | 183       | 10.543636        | 28             | 2.655630              | 2.99096532563077   | 2.199356e-06 | 0.0016627132         |
| 82 | chr_POS   | REACTOME_REGULATION_OF_INSULIN_SECRETION                                              | 26538      | 1529      | 88        | 5.070164         | 18             | 3.550181              | 4.243765058091497  | 2.258867e-06 | 0.0006095868         |
| 83 | trans_NEG | REGULATION_OF_T_CELL_ACTIVATION                                                       | 26538      | 8266      | 28        | 8.721381         | 21             | 2.407876              | 6.6451889864618703 | 2.294959e-06 | 0.0075721634         |
| 84 | chr_POS   | EGFR_UP_V1_DN                                                                         | 26538      | 1529      |           |                  |                |                       |                    |              |                      |

|    | set1_Name | set2_Name                                                                                       | Background | set1_size | set2_size | expected_overlap | actual_overlap | enrichment_foldchange | odds_ratio          | FET_pvalue   | corrected_FET_pvalue |
|----|-----------|-------------------------------------------------------------------------------------------------|------------|-----------|-----------|------------------|----------------|-----------------------|---------------------|--------------|----------------------|
| 1  | trans_NEG | BIOCARTA_TCR_A_PATHWAY                                                                          | 26538      | 8266      | 11        | 3.426257         | 11             | 3.210501              | Inf                 | 2.665070e-06 | 0.0023132807         |
| 2  | trans_NEG | REACTOME_UNWINDING_OF_DNA                                                                       | 26538      | 8266      | 11        | 3.426257         | 11             | 3.210501              | Inf                 | 2.665070e-06 | 0.0071850284         |
| 3  | trans_NEG | INTERLEUKIN_RECEPTOR_ACTIVITY                                                                   | 26538      | 8266      | 19        | 5.918080         | 16             | 2.703580              | 11.8125672626044    | 2.668534e-06 | 0.0042269584         |
| 4  | cis_POS   | PROTEIN_MODIFICATION_PROCESS                                                                    | 26538      | 1529      | 623       | 35.884453        | 65             | 1.810865              | 1.84547260819449    | 2.843482e-06 | 0.0093634920         |
| 5  | trans_NEG | HALLMARK_UV_RESPONSE_DN                                                                         | 26538      | 8266      | 143       | 44.541337        | 71             | 1.594025              | 2.18989590531602    | 2.883804e-06 | 0.005767608          |
| 6  | trans_POS | REACTOME_M_G1_TRANSITION                                                                        | 26538      | 7352      | 78        | 21.608863        | 41             | 1.897370              | 2.8022251488530802  | 3.025068e-06 | 0.0081555832         |
| 7  | cis_NEG   | REACTOME_METABOLISM_OF_LIPIDS_AND_LIPOPROTEINS                                                  | 26538      | 4004      | 469       | 70.761776        | 108            | 1.526248              | 1.70259234519109    | 3.067512e-06 | 0.0082430527         |
| 8  | trans_POS | KEGG_PS3_SIGNALING_PATHWAY                                                                      | 26538      | 7352      | 68        | 18.838486        | 37             | 1.964063              | 3.1251233468886002  | 3.104702e-06 | 0.0023098886         |
| 9  | trans_POS | REACTOME_TCR_SIGNALING                                                                          | 26538      | 7352      | 51        | 14.128872        | 30             | 2.123312              | 3.789944791917999   | 3.110953e-06 | 0.003871295          |
| 10 | cis_POS   | REACTOME_G_ALPHA_S_SIGNALING_EVENTS                                                             | 26538      | 1529      | 117       | 6.741013         | 21             | 3.115259              | 3.6135522368389501  | 3.116724e-06 | 0.0084026877         |
| 11 | trans_NEG | KEGG_NATURAL_KILLER_CELL_MEDIATED_CYTOTOXICITY                                                  | 26538      | 8266      | 126       | 39.246213        | 64             | 1.630731              | 2.2917584413409502  | 3.302442e-06 | 0.0024570166         |
| 12 | cis_NEG   | REACTOME_PHOSPHORYLATION_OF_CD3_AND_TCR_ZETA_CHAINS                                             | 26538      | 4004      | 14        | 2.112292         | 10             | 4.734194              | 14.09806748488201   | 3.368120e-06 | 0.0060804525         |
| 13 | cis_POS   | HALLMARK_HEDGEHOG_SIGNALING                                                                     | 26538      | 1529      | 36        | 2.074158         | 11             | 5.303357              | 7.2396719377282502  | 3.528582e-06 | 0.0007057164         |
| 14 | trans_NEG | MTOR_UP_V1_UP                                                                                   | 26538      | 8266      | 164       | 51.082372        | 79             | 1.546522              | 2.0646363399458298  | 3.677844e-06 | 0.0027802988         |
| 15 | cis_NEG   | KEGG_MAPK_SIGNALING_PATHWAY                                                                     | 26538      | 4004      | 263       | 39.680910        | 88             | 1.713670              | 1.9791818437311099  | 3.707005e-06 | 0.0027580120         |
| 16 | trans_POS | RESPONSE_TO_EXTERNAL_STIMULUS                                                                   | 26538      | 7352      | 305       | 84.496194        | 121            | 1.432017              | 1.7280354912990199  | 3.715777e-06 | 0.0122620651         |
| 17 | trans_POS | HEMOPOIETIC_OR_LYMPHOID_ORGAN_DEVELOPMENT                                                       | 26538      | 7352      | 76        | 21.054789        | 40             | 1.899605              | 2.80984363451138    | 3.814019e-06 | 0.0125862314         |
| 18 | cis_POS   | REACTOME_PLATELET_HOMEOSTASIS                                                                   | 26538      | 1529      | 74        | 4.263547         | 16             | 3.752744              | 4.5487888415699736  | 3.815893e-06 | 0.0102876486         |
| 19 | trans_POS | POSITIVE_REGULATION_OF_IMMUNE_SYSTEM_PROCESS                                                    | 26538      | 7352      | 49        | 13.574798        | 29             | 2.136312              | 3.7947547363546001  | 3.821289e-06 | 0.0126102546         |
| 20 | cis_POS   | SYSTEM_PROCESS                                                                                  | 26538      | 1529      | 552       | 31.803753        | 59             | 1.855127              | 1.9958303496082199  | 3.834809e-06 | 0.0126537624         |
| 21 | cis_NEG   | REACTOME_APOPTOSIS                                                                              | 26538      | 4004      | 143       | 21.575552        | 43             | 1.992997              | 2.4352856529298101  | 4.002963e-06 | 0.0107919890         |
| 22 | cis_NEG   | ORGAN_MORPHOGENESIS                                                                             | 26538      | 4004      | 143       | 21.575552        | 43             | 1.992997              | 2.4352856529298101  | 4.002963e-06 | 0.0132997788         |
| 23 | cis_NEG   | CAMP_UP_V1_UP                                                                                   | 26538      | 4004      | 195       | 29.421207        | 54             | 1.835411              | 2.1710783318151199  | 4.177889e-06 | 0.0031585591         |
| 24 | trans_POS | BIOCARTA_IL7_PATHWAY                                                                            | 26538      | 7352      | 17        | 4.709624         | 14             | 2.972638              | 12.1974787800778    | 4.321951e-06 | 0.0037514536         |
| 25 | trans_POS | BIOCARTA_NQ2L12_PATHWAY                                                                         | 26538      | 7352      | 17        | 4.709624         | 14             | 2.972638              | 12.1974787800778    | 4.321951e-06 | 0.0037514536         |
| 26 | trans_POS | REACTOME_CELL_SURFACE_INTERACTIONS_AT_THE_VASCULAR_WALL                                         | 26538      | 7352      | 84        | 23.271083        | 43             | 1.847787              | 2.4702073511738399  | 4.346465e-06 | 0.0117180702         |
| 27 | cis_POS   | REACTOME_TRANSPORT_OF_INORGANIC_CATIONS_ANIONS_AND_AMINO_ACIDS_Oligopeptides                    | 26538      | 1529      | 92        | 5.300626         | 18             | 3.395826              | 4.0139705325762396  | 4.404905e-06 | 0.0118756233         |
| 28 | trans_POS | STK33_UP                                                                                        | 26538      | 7352      | 279       | 77.283240        | 112            | 1.449027              | 1.76169351712348    | 4.405997e-06 | 0.0033309339         |
| 29 | trans_NEG | ADHERENS_JUNCTION                                                                               | 26538      | 8266      | 23        | 7.163991         | 18             | 2.512566              | 7.9722560349125802  | 4.439057e-06 | 0.0041372009         |
| 30 | cis_POS   | KRAS_300_UP_V1_DN                                                                               | 26538      | 1529      | 139       | 8.008554         | 23             | 2.871929              | 3.277080662467238   | 4.556529e-06 | 0.0034447363         |
| 31 | cis_POS   | KRAS_300_UP_V1_UP                                                                               | 26538      | 1529      | 139       | 8.008554         | 23             | 2.871929              | 3.277080662467238   | 4.556529e-06 | 0.0034447363         |
| 32 | trans_POS | HALLMARK_TNF_SIGNALING_VIA_NFKB                                                                 | 26538      | 7352      | 200       | 55.407340        | 85             | 1.534093              | 1.33976345519556    | 4.551084e-06 | 0.0009182168         |
| 33 | trans_POS | DNA_BINDING                                                                                     | 26538      | 7352      | 597       | 165.390911       | 215            | 1.299591              | 1.4828683398083499  | 4.650460e-06 | 0.0073663282         |
| 34 | trans_POS | REGULATION_OF_CELL_CYCLE                                                                        | 26538      | 7352      | 180       | 49.866606        | 78             | 1.564173              | 2.0062948392734201  | 4.669089e-06 | 0.0154077249         |
| 35 | trans_NEG | REACTOME_IL_3_5_AND_GM-CSF_SIGNALING                                                            | 26538      | 8266      | 43        | 13.303549        | 28             | 2.005959              | 4.1362040892731402  | 4.671532e-06 | 0.0125944505         |
| 36 | trans_POS | APOPTOSIS_GO                                                                                    | 26538      | 7352      | 422       | 116.904888       | 159            | 1.360326              | 1.5904239055789999  | 4.680814e-06 | 0.0154466860         |
| 37 | trans_NEG | HALLMARK_MYC_TARGETS_V2                                                                         | 26538      | 8266      | 56        | 17.442761        | 34             | 1.949233              | 3.4257716530381499  | 4.701042e-06 | 0.0098402385         |
| 38 | trans_POS | REACTOME_COSTIMULATION_BY_THE_CD28_FAMILY                                                       | 26538      | 7352      | 59        | 16.345165        | 33             | 2.018946              | 3.3224248460695902  | 4.714865e-06 | 0.0127112771         |
| 39 | cis_NEG   | KEGG_FC_EPBILON_R1_SIGNALING_PATHWAY                                                            | 26538      | 4004      | 78        | 11.768483        | 28             | 2.378236              | 3.1685679394280599  | 4.733523e-06 | 0.0030217479         |
| 40 | trans_POS | HEMOPOIESIS                                                                                     | 26538      | 7352      | 74        | 20.500716        | 39             | 1.902373              | 2.9179105939406299  | 4.809089e-06 | 0.0158689900         |
| 41 | trans_NEG | CELL_SUBSTRATE_ADHERENS_JUNCTION                                                                | 26538      | 8266      | 16        | 4.983646         | 14             | 2.809188              | 15.4980004292853    | 4.855635e-06 | 0.0045254516         |
| 42 | trans_NEG | KEGG_ANTIEN_PROCESSING_AND_PRESENTATION                                                         | 26538      | 4004      | 74        | 11.164971        | 27             | 2.418278              | 3.2479913921453608  | 4.882769e-06 | 0.0086327799         |
| 43 | cis_NEG   | KEGG_ARRHYTHMOGENIC_RIGHT_VENTRICULAR_CARDIOMYOPATHY_ARRVC                                      | 26538      | 4004      | 74        | 11.164971        | 27             | 2.418278              | 3.2479913921453608  | 4.882769e-06 | 0.0086327799         |
| 44 | trans_NEG | ATF2_UP_V1_DN                                                                                   | 26538      | 8266      | 183       | 57.000452        | 86             | 1.508760              | 1.9693955753924199  | 4.921085e-06 | 0.0037203406         |
| 45 | cis_NEG   | LYMPHOCYTE_DIFFERENTIATION                                                                      | 26538      | 4004      | 26        | 3.922828         | 14             | 3.568854              | 6.5846383627095202  | 4.923299e-06 | 0.0162468760         |
| 46 | cis_POS   | KEGG_PANCREATIC_CANCER                                                                          | 26538      | 4004      | 70        | 10.561459        | 26             | 2.461781              | 3.34054943777774    | 4.977500e-06 | 0.0037032635         |
| 47 | cis_POS   | REACTOME_L1CAM_INTERACTIONS                                                                     | 26538      | 1529      | 84        | 4.839702         | 17             | 3.512613              | 4.1852705482423804  | 4.984295e-06 | 0.0134646198         |
| 48 | trans_POS | B_CELL_ACTIVATION                                                                               | 26538      | 7352      | 19        | 5.263697         | 15             | 2.849708              | 9.802884468442296   | 5.031354e-06 | 0.0166034668         |
| 49 | cis_NEG   | ESC_I1_UP_EARLYV1_DN                                                                            | 26538      | 4004      | 177       | 26.705404        | 50             | 1.872280              | 2.2308714889626     | 5.072565e-06 | 0.0038348592         |
| 50 | cis_POS   | INORGANIC_ANION_TRANSMEMBRANE_TRANSPORTER_ACTIVITY                                              | 26538      | 1529      | 19        | 1.094694         | 8              | 7.307976              | 11.349904589911601  | 5.083807e-06 | 0.0080527506         |
| 51 | cis_NEG   | SINGH_KRAS_DEPENDENCY_SIGNATURE_E                                                               | 26538      | 4004      | 20        | 3.017569         | 12             | 3.978723              | 8.4630116030445102  | 5.247379e-06 | 0.0039670184         |
| 52 | trans_NEG | REACTOME_CHEMOKINE_RECEPTORS_BIND_CHEMOKINES                                                    | 26538      | 8266      | 54        | 16.818866        | 33             | 1.961973              | 3.4832402170885399  | 5.293354e-06 | 0.0142708825         |
| 53 | trans_NEG | POSITIVE_REGULATION_OF_DEVELOPMENTAL_PROCESS                                                    | 26538      | 8266      | 212       | 66.033311        | 97             | 1.468956              | 1.8748186002494949  | 5.382447e-06 | 0.0177620767         |
| 54 | trans_POS | REACTOME_FANCON_ANEMIA_PATHWAY                                                                  | 26538      | 7352      | 21        | 5.817771         | 16             | 2.750194              | 8.3657381806797233  | 5.383820e-06 | 0.0145144482         |
| 55 | cis_POS   | PROGRAMMED_CELL_DEATH                                                                           | 26538      | 7352      | 423       | 117.186555       | 159            | 1.356811              | 1.5843161157163499  | 5.466903e-06 | 0.0180407797         |
| 56 | cis_POS   | KRAS_PROSTATE_UP_V1_DN                                                                          | 26538      | 4004      | 140       | 21.122918        | 42             | 1.988362              | 2.4268956291922502  | 5.498309e-06 | 0.0041565629         |
| 57 | trans_POS | RESPONSE_TO_ENDOGENOUS_STIMULUS                                                                 | 26538      | 7352      | 195       | 54.022157        | 83             | 1.536407              | 1.84462639252520801 | 5.504111e-06 | 0.0181635669         |
| 58 | trans_POS | CAMP_UP_V1_DN                                                                                   | 26538      | 7352      | 195       | 54.022157        | 83             | 1.536407              | 1.84462639252520801 | 5.504111e-06 | 0.0041611081         |
| 59 | trans_NEG | REACTOME_EXTENSION_OF_TELOMERES                                                                 | 26538      | 8266      | 27        | 8.409903         | 20             | 2.378149              | 6.3279602915659598  | 5.574393e-06 | 0.0150285637         |
| 60 | cis_NEG   | REGULATION_OF_CATALYTIC_ACTIVITY                                                                | 26538      | 4004      | 271       | 40.887934        | 69             | 1.687539              | 1.93860895150971    | 5.594454e-06 | 0.0184619996         |
| 61 | trans_POS | DNA_REPAIR                                                                                      | 26538      | 7352      | 122       | 33.798478        | 57             | 1.686466              | 2.29845530240339    | 5.651612e-06 | 0.0186503192         |
| 62 | cis_NEG   | REACTOME_TRANSLLOCATION_OF_ZAP_70_TO_IMMUNOLOGICAL_SYNAPSE                                      | 26538      | 4004      | 12        | 1.810536         | 9              | 4.970904              | 16.917476198800401  | 5.718797e-06 | 0.0154178705         |
| 63 | cis_NEG   | KRAS_LLUNG_UP_V1_DN                                                                             | 26538      | 4004      | 136       | 20.519496        | 41             | 1.998109              | 2.4432334757617     | 6.184435e-06 | 0.0046754325         |
| 64 | cis_NEG   | RPS14_DN_V1_DN                                                                                  | 26538      | 4004      | 183       | 27.610671        | 51             | 1.847112              | 2.1894811940702898  | 6.257570e-06 | 0.0047307231         |
| 65 | trans_POS | KEGG_DNA_REPLICATION                                                                            | 26538      | 7352      | 36        | 9.973321         | 23             | 2.306153              | 4.62810361322079    | 6.336873e-06 | 0.0047146334         |
| 66 | trans_POS | EF1_UP_V1_UP                                                                                    | 26538      | 7352      | 187       | 51.805883        | 80             | 1.544227              | 1.9616231052534601  | 6.401019e-06 | 0.0048391704         |
| 67 | cis_POS   | KRAS_PROSTATE_UP_V1_UP                                                                          | 26538      | 1529      | 132       | 7.605245         | 22             | 2.892740              | 3.30417771107288    | 6.462261e-06 | 0.0048854690         |
| 68 | cis_POS   | ATF2_S_UP_V1_UP                                                                                 | 26538      | 4004      | 188       | 28.365061        | 52             | 1.833241              | 2.1669187400414498  | 6.465213e-06 | 0.0048877012         |
| 69 | cis_NEG   | PRC2_EDHD_UP_V1_DN                                                                              | 26538      | 4004      | 188       | 28.365061        | 52             | 1.833241              | 2.1669187400414498  | 6.465213e-06 | 0.0048877012         |
| 70 | cis_NEG   | REACTOME_SIGNALING_BY_SCF_XIT                                                                   | 26538      | 4004      | 75        | 11.315849        | 27             | 2.388034              | 3.1801867537373908  | 6.538657e-06 | 0.0176282189         |
| 71 | trans_POS | REACTOME_TRANSLLOCATION_OF_ZAP_70_TO_IMMUNOLOGICAL_SYNAPSE                                      | 26538      | 7352      | 12        | 3.324440         | 11             | 3.308828              | 28.744603988008802  | 6.571569e-06 | 0.0177169490         |
| 72 | trans_NEG | KEGG_PS3_SIGNALING_PATHWAY                                                                      | 26538      | 8266      | 68        | 21.180496        | 39             | 1.841317              | 2.9819575440370398  | 6.867880e-06 | 0.0051096979         |
| 73 | trans_NEG | CELL_MATRIX_JUNCTION                                                                            | 26538      | 8266      | 18        | 5.606602         | 15             | 2.675417              | 11.0663278118487    | 7.259525e-06 | 0.0067658777         |
| 74 | cis_POS   | REACTOME_NEUROTRANSMITTER_RECEPTOR_BINDING_AND_DOWNSTREAM_TRANSMISSION_IN_THE_POSTSYNAPTIC_CELL | 26538      | 1529      | 133       | 7.662861         | 22             | 2.870990              | 3.27428121171249    | 7.327104e-06 | 0.0197538732         |
| 75 | cis_POS   | KRAS_KIDNEY_UP_V1_DN                                                                            | 26538      | 1529      | 133       | 7.662861         | 22             | 2.870990              | 3.27428121171249    | 7.327104e-06 | 0.0055392008         |
| 76 | trans_POS | PROTEIN_DIMERIZATION_ACTIVITY                                                                   | 26538      | 7352      | 179       | 49.589570        | 77             | 1.552746              | 1.9803097816794439  | 7.416114e-06 | 0.0117471240         |
| 77 | cis_POS   | ORGAN_MORPHOGENESIS                                                                             | 26538      | 1529      | 143       | 8.239016         | 23             | 2.791596              | 3.1673470757019002  | 7.425436e-06 | 0.0245039386         |
| 78 | trans_NEG | REACTOME_CHROMOSOME_MAINTENANCE                                                                 | 26538      | 8266      | 116       | 36.131434        | 59             | 1.632927              | 2.2972704211580801  | 7.426831e-06 | 0.0200227351         |
| 79 | cis_NEG   | REGULATION_OF_PROTEIN_AMINO_ACID_PHOSPHORYLATION                                                | 26538      | 4004      | 30        | 4.526340         | 15             | 3.313906              | 5.6447565045616903  | 7.502585e-06 | 0.0247585313         |
| 80 | cis_POS   | EXTRACELLULAR_REGION                                                                            | 26538      | 4004      | 435       | 65.631924        | 100            | 1.523649              | 1.69723445049758    | 7.518308e-06 | 0.0070709634         |
| 81 | trans_NEG | FOCAL_ADHESION                                                                                  | 26538      | 8266      | 13        | 4.049212         | 12             | 2.963539              | 26.50541526698401   | 7.684754e-06 | 0.0071621010         |
| 82 | trans_POS | KEGG_VIRAL_MYOCARDITIS                                                                          | 26538      | 7352      | 65        | 18.007386        | 35             | 1.943647              | 3.0543775678898699  | 7.780859e-06 | 0.0057889584         |
| 83 | trans_POS | NUCLEUS                                                                                         | 26538      | 7352      | 1404      | 388.95953        |                |                       |                     |              |                      |

|    | set1_Name | set2_Name                                                             | Background | set1_size | set2_size | expected_overlap | actual_overlap | enrichment_foldchange | odds_ratio          | FET_pvalue   | corrected_FET_pvalue |
|----|-----------|-----------------------------------------------------------------------|------------|-----------|-----------|------------------|----------------|-----------------------|---------------------|--------------|----------------------|
| 1  | cis_NEG   | REACTOME_THE_ROLE_OF_NEF_IN_HIV1_REPLICATION_AND_DISEASE_PATHOGENESIS | 26538      | 4004      | 27        | 4.073706         | 14             | 3.436074              | 6.0779140049189602  | 8.802850e-06 | 0.023732753          |
| 2  | cis_POS   | IL2_UP_V1_DN                                                          | 26538      | 1529      | 186       | 10.716482        | 27             | 2.519484              | 2.8002870368843101  | 9.050248e-06 | 0.006841987          |
| 3  | trans_NEG | RECEPTOR_BINDING                                                      | 26538      | 8266      | 374       | 116.492727       | 156            | 1.339139              | 1.5829911037043101  | 9.138623e-06 | 0.014477479          |
| 4  | cis_NEG   | CORDENONIS_YAP_CONSERVED_SIGNATURE                                    | 26538      | 4004      | 56        | 8.449167         | 22             | 2.603007              | 3.655268852303688   | 9.187632e-06 | 0.006945850          |
| 5  | cis_NEG   | PHOSPHORIC_ESTER_HYDROLASE_ACTIVITY                                   | 26538      | 4004      | 152       | 22.933454        | 44             | 1.918595              | 2.3071074800034789  | 9.242630e-06 | 0.014640326          |
| 6  | cis_NEG   | POSITIVE_REGULATION_OF_MULTICELLULAR_ORGANISMAL_PROCESS               | 26538      | 4004      | 64        | 9.656191         | 24             | 2.485452              | 3.390639529689502   | 9.408543e-06 | 0.031048191          |
| 7  | trans_NEG | REACTOME_M_G1_TRANSITION                                              | 26538      | 8266      | 78        | 24.295275        | 43             | 1.769891              | 2.7246197652639199  | 9.402686e-06 | 0.025592281          |
| 8  | cis_NEG   | HOMEOSTATIC_PROCESS                                                   | 26538      | 4004      | 205       | 30.929987        | 55             | 1.778210              | 2.078324058657499   | 9.533809e-06 | 0.031461565          |
| 9  | cis_POS   | KEGG_PROSTATE_CANCER                                                  | 26538      | 1529      | 88        | 5.070164         | 17             | 3.362949              | 3.9491030541048402  | 9.632638e-06 | 0.007166682          |
| 10 | trans_NEG | PHOSPHORIC_ESTER_HYDROLASE_ACTIVITY                                   | 26538      | 8266      | 152       | 47.344638        | 73             | 1.541985              | 2.0519033768022998  | 9.632946e-06 | 0.015258587          |
| 11 | trans_POS | KEGG_LEISHMANIA_INFECTION                                             | 26538      | 7352      | 68        | 18.839496        | 36             | 1.910981              | 2.9452193377609499  | 9.645286e-06 | 0.007176003          |
| 12 | cis_NEG   | PHOSPHORIC_MONOESTER_HYDROLASE_ACTIVITY                               | 26538      | 4004      | 111       | 16.747456        | 35             | 2.089670              | 2.8056521861037499  | 9.722009e-06 | 0.015399662          |
| 13 | cis_NEG   | BIOCARTA_BCR_PATHWAY                                                  | 26538      | 4004      | 34        | 5.129852         | 16             | 3.118999              | 5.0182874999715903  | 1.008689e-05 | 0.008755423          |
| 14 | cis_NEG   | REGULATION_OF_LYMPHOCYTE_ACTIVATION                                   | 26538      | 4004      | 34        | 5.129852         | 16             | 3.118999              | 5.0182874999715903  | 1.008689e-05 | 0.033286748          |
| 15 | trans_NEG | MEL18_DN_V1_DN                                                        | 26538      | 8266      | 142       | 44.228959        | 69             | 1.560032              | 2.0865357310506401  | 1.014971e-05 | 0.007673180          |
| 16 | trans_NEG | VGF_A_UP_V1_DN                                                        | 26538      | 8266      | 191       | 59.492275        | 88             | 1.479184              | 1.89818265735501    | 1.024965e-05 | 0.007748738          |
| 17 | cis_POS   | RAPA_EARLY_UP_V1_UP                                                   | 26538      | 1529      | 177       | 10.187943        | 26             | 2.549534              | 2.8475790801252199  | 1.061205e-05 | 0.006022710          |
| 18 | cis_POS   | CALCIUM_CHANNEL_ACTIVITY                                              | 26538      | 1529      | 33        | 1.901311         | 10             | 5.259528              | 7.149858336917712   | 1.067761e-05 | 0.016913332          |
| 19 | cis_NEG   | KEGG_FC_GAMMA_R_MEDIATED_PHAGOCYTOSIS                                 | 26538      | 4004      | 94        | 14.182531        | 31             | 2.185788              | 2.7830634167536301  | 1.123710e-05 | 0.008360405          |
| 20 | trans_NEG | NUCLEAR_RPRT                                                          | 26538      | 8266      | 572       | 178.165348       | 226            | 1.268485              | 1.45632302712503    | 1.124906e-05 | 0.010484120          |
| 21 | cis_POS   | HALLMARK_APICAL_JUNCTION                                              | 26538      | 1529      | 199       | 11.465483        | 28             | 2.442112              | 2.7096004703857002  | 1.134497e-05 | 0.002268994          |
| 22 | cis_POS   | HALLMARK_KRAS_SIGNALING_UP                                            | 26538      | 1529      | 199       | 11.465483        | 28             | 2.442112              | 2.7096004703857002  | 1.134497e-05 | 0.002268994          |
| 23 | trans_NEG | JNK_DN_V1_DN                                                          | 26538      | 8266      | 181       | 56.377496        | 84             | 1.489566              | 1.9236652734391699  | 1.146022e-05 | 0.008653929          |
| 24 | trans_NEG | KRAS_600_UP_V1_UP                                                     | 26538      | 8266      | 274       | 85.344939        | 119            | 1.394342              | 1.7072489101013599  | 1.146383e-05 | 0.008666658          |
| 25 | cis_NEG   | PROTEIN_COMPLEX                                                       | 26538      | 4004      | 805       | 121.456779       | 166            | 1.365741              | 1.481984513448099   | 1.160903e-05 | 0.010819620          |
| 26 | cis_NEG   | POSITIVE_REGULATION_OF_IMMUNE_SYSTEM_PROCESS                          | 26538      | 4004      | 49        | 7.393021         | 20             | 2.705254              | 3.8955354436881402  | 1.163975e-05 | 0.039071181          |
| 27 | cis_NEG   | MOLECULAR_ADAPTOR_ACTIVITY                                            | 26538      | 4004      | 49        | 7.393021         | 20             | 2.705254              | 3.8955354436881402  | 1.163975e-05 | 0.018754167          |
| 28 | cis_NEG   | ACTIN_CYTOSKELETON_ORGANIZATION_AND_BIOGENESIS                        | 26538      | 4004      | 103       | 15.540433        | 33             | 2.123493              | 2.66664327431076    | 1.186563e-05 | 0.039156571          |
| 29 | cis_NEG   | KEGG_CHRONIC_MYELOID_LEUKEMIA                                         | 26538      | 4004      | 73        | 11.014953        | 26             | 2.360612              | 3.1269152467862802  | 1.202825e-05 | 0.008948015          |
| 30 | trans_POS | JNK_DN_V1_DN                                                          | 26538      | 7352      | 181       | 50.143643        | 77             | 1.535598              | 1.94203710091375    | 1.204315e-05 | 0.009104618          |
| 31 | trans_NEG | KEGG_CALCIIUM_SIGNALING_PATHWAY                                       | 26538      | 8266      | 178       | 54.820107        | 82             | 1.455802              | 1.9376378982921401  | 1.207809e-05 | 0.008986478          |
| 32 | trans_POS | DNA_DEPENDENT_DNA_REPLICATION                                         | 26538      | 7352      | 56        | 15.514055        | 31             | 1.998188              | 3.24523864019935    | 1.208816e-05 | 0.039239339          |
| 33 | trans_POS | ORGANELLE_PART                                                        | 26538      | 7352      | 1177      | 306.072198       | 391            | 1.199121              | 1.3149323753021101  | 1.210387e-05 | 0.011289808          |
| 34 | cis_POS   | PRC2_EDD_UP_V1_DN                                                     | 26538      | 1529      | 189       | 10.889329        | 27             | 2.479492              | 2.756988546442501   | 1.218005e-05 | 0.009221726          |
| 35 | trans_POS | KEGG_TYPE1DIABETES_MELLITUS                                           | 26538      | 7352      | 37        | 10.250358        | 23             | 2.243824              | 4.2072481405751601  | 1.235178e-05 | 0.009189727          |
| 36 | cis_POS   | KEGG_PATHWAYS_IN_CANCER                                               | 26538      | 1529      | 325       | 18.725036        | 39             | 2.082773              | 2.2632692056321502  | 1.239443e-05 | 0.009221455          |
| 37 | cis_NEG   | REACTOME_NETRIXIN_SIGNALING                                           | 26538      | 4004      | 38        | 5.733363         | 17             | 2.965101              | 4.5708993284839103  | 1.243547e-05 | 0.033526026          |
| 38 | trans_NEG | REGULATION_OF_BIOLOGICAL_QUALITY                                      | 26538      | 8266      | 412       | 128.328887       | 169            | 1.316929              | 1.5485370780412     | 1.260019e-05 | 0.041580638          |
| 39 | trans_NEG | IEF1_UP_V1_DN                                                         | 26538      | 8266      | 184       | 57.311930        | 85             | 1.483112              | 1.907269289551201   | 1.268357e-05 | 0.009588779          |
| 40 | trans_NEG | ATF2_S_UP_V1_DN                                                       | 26538      | 8266      | 184       | 57.311930        | 85             | 1.483112              | 1.907269289551201   | 1.268357e-05 | 0.009588779          |
| 41 | trans_NEG | KEGG_ARRHYTHMOGENIC_RIGHT_VENTRICULAR_CARDIOMYOPATHY_ARVC             | 26538      | 8266      | 74        | 23.049363        | 41             | 1.778791              | 2.7549713891925198  | 1.289775e-05 | 0.009595927          |
| 42 | trans_POS | MITOTIC_SISTER_CHROMATID_SEGREGATION                                  | 26538      | 7352      | 16        | 4.432587         | 13             | 2.932824              | 11.3253869435121    | 1.293423e-05 | 0.042682962          |
| 43 | cis_NEG   | REACTOME_INNATE_IMMUNE_SYSTEM                                         | 26538      | 4004      | 257       | 38.775642        | 65             | 1.676310              | 1.92004146300940    | 1.294715e-05 | 0.034095509          |
| 44 | cis_POS   | PRC1_BMI_UP_V1_DN                                                     | 26538      | 1529      | 179       | 10.313174        | 26             | 2.521047              | 2.81013488346498    | 1.301216e-05 | 0.009837191          |
| 45 | trans_POS | REACTOME_G_ALPHA_I_SIGNALING_EVENTS                                   | 26538      | 7352      | 190       | 52.636973        | 80             | 1.519844              | 1.90788442451875    | 1.301288e-05 | 0.035082720          |
| 46 | cis_POS   | KEGG_GAP_JUNCTION                                                     | 26538      | 1529      | 90        | 5.185395         | 17             | 3.278439              | 3.8386683508662801  | 1.316101e-05 | 0.009791793          |
| 47 | cis_NEG   | POSITIVE_REGULATION_OF_CELLULAR_METABOLIC_PROCESS                     | 26538      | 4004      | 227       | 34.249303        | 59             | 1.722683              | 1.99106401827266    | 1.326039e-05 | 0.043756297          |
| 48 | cis_NEG   | KEGG_JAK_STAT_SIGNALING_PATHWAY                                       | 26538      | 4004      | 154       | 23.252510        | 44             | 1.893078              | 2.2849617543687901  | 1.329082e-05 | 0.009888371          |
| 49 | cis_NEG   | ENZYME_LINKED_RECEPTOR_PROTEIN_SIGNALING_PATHWAY                      | 26538      | 4004      | 140       | 21.122918        | 41             | 1.941020              | 2.3444039131657601  | 1.349677e-05 | 0.044539330          |
| 50 | cis_NEG   | IL21_UP_V1_UP                                                         | 26538      | 4004      | 178       | 26.856282        | 49             | 1.824527              | 2.1517481083094299  | 1.352464e-05 | 0.010224630          |
| 51 | trans_NEG | HYDROLASE_ACTIVITY_ACTING_ON_ETHER_BONDS                              | 26538      | 8266      | 264       | 82.230161        | 115            | 1.389514              | 1.71602640730334    | 1.352570e-05 | 0.021424708          |
| 52 | trans_POS | HALLMARK_MYC_TARGETS_V1                                               | 26538      | 7352      | 198       | 54.299194        | 82             | 1.510151              | 1.886839029696268   | 1.358871e-05 | 0.002719741          |
| 53 | trans_NEG | CHROMOSOMEPERICENTRIC_REGION                                          | 26538      | 8266      | 30        | 9.344336         | 21             | 2.247351              | 5.1677562829333404  | 1.379222e-05 | 0.012854549          |
| 54 | trans_POS | INTERLEUKIN_BINDING                                                   | 26538      | 7352      | 24        | 6.648881         | 17             | 2.556821              | 6.3486203097313698  | 1.379738e-05 | 0.021855060          |
| 55 | trans_POS | HALLMARK_ESTROGEN_RESPONSE_LATE                                       | 26538      | 7352      | 199       | 55.130304        | 83             | 1.505524              | 1.8769872364970701  | 1.387258e-05 | 0.002774516          |
| 56 | trans_POS | HALLMARK_APICAL_JUNCTION                                              | 26538      | 7352      | 199       | 55.130304        | 83             | 1.505524              | 1.8769872364970701  | 1.387258e-05 | 0.002774516          |
| 57 | trans_POS | INTRACELLULAR_ORGANELLE_PART                                          | 26538      | 7352      | 1172      | 324.687015       | 389            | 1.198077              | 1.3130472196557901  | 1.390787e-05 | 0.012962132          |
| 58 | trans_POS | KEGG_ANTIGEN_PROCESSING_AND_PRESENTATION                              | 26538      | 7352      | 74        | 20.500716        | 38             | 1.853594              | 2.783053266375099   | 1.400241e-05 | 0.010417797          |
| 59 | cis_NEG   | HOK9_DN_V1_DN                                                         | 26538      | 4004      | 188       | 28.365061        | 51             | 1.797987              | 2.1091220818168009  | 1.419773e-05 | 0.010733487          |
| 60 | cis_NEG   | TRANSMEMBRANE_RECEPTOR_PROTEIN_TYROSINE_KINASE_ACTIVITY               | 26538      | 4004      | 42        | 6.336875         | 18             | 2.840517              | 4.2303019335191597  | 1.438844e-05 | 0.022807133          |
| 61 | trans_NEG | IMMUNE_SYSTEM_DEVELOPMENT                                             | 26538      | 8266      | 79        | 24.606753        | 43             | 1.747488              | 2.6950875352035598  | 1.457631e-05 | 0.048101816          |
| 62 | trans_NEG | REACTOME_SIGNALING_BY_PDGF                                            | 26538      | 8266      | 118       | 36.754390        | 59             | 1.605250              | 2.21916593540630    | 1.458958e-05 | 0.039360468          |
| 63 | trans_POS | CELL_SURFACE_RECEPTOR_LINKED_SIGNAL_TRANSDUCTION_GO_0007186           | 26538      | 7352      | 635       | 175.918306       | 224            | 1.273318              | 1.43550291800724299 | 1.462139e-05 | 0.048910591          |
| 64 | cis_POS   | KEGG_MELANOGENESIS                                                    | 26538      | 1529      | 100       | 5.761549         | 18             | 3.124160              | 3.6209763280130088  | 1.484384e-05 | 0.011039948          |
| 65 | trans_NEG | KEGG_AUTIMMUNE_THYROID_DISEASE                                        | 26538      | 8266      | 47        | 14.639460        | 29             | 1.890947              | 3.5701622456336302  | 1.502651e-05 | 0.011179727          |
| 66 | cis_POS   | KRAS_LUNG_BREAST_UP_V1_DN                                             | 26538      | 1529      | 139       | 8.008554         | 22             | 2.747063              | 3.1056382688122302  | 1.510896e-05 | 0.011420864          |
| 67 | cis_NEG   | CRX_NRL_DN_V1_UP                                                      | 26538      | 4004      | 136       | 20.519406        | 40             | 1.949374              | 2.30841842834503    | 1.525933e-05 | 0.011556161          |
| 68 | cis_NEG   | TRANSMEMBRANE_RECEPTOR_ACTIVITY                                       | 26538      | 4004      | 410       | 61.859974        | 94             | 1.519561              | 1.69027605094293    | 1.554037e-05 | 0.024815944          |
| 69 | cis_POS   | JNK_DN_V1_DN                                                          | 26538      | 1529      | 181       | 10.428405        | 26             | 2.493191              | 2.7736560995959699  | 1.589542e-05 | 0.012016937          |
| 70 | cis_NEG   | BCAT_GDST48_UP                                                        | 26538      | 4004      | 46        | 6.940287         | 19             | 2.737599              | 3.97425894900362    | 1.590537e-05 | 0.010204457          |
| 71 | cis_NEG   | PRC1_BMI_UP_V1_DN                                                     | 26538      | 4004      | 179       | 27.007160        | 49             | 1.814334              | 2.1351052052489798  | 1.592533e-05 | 0.010209551          |
| 72 | cis_NEG   | HYDROLASE_ACTIVITY_ACTING_ON_ETHER_BONDS                              | 26538      | 4004      | 264       | 39.831788        | 66             | 1.656968              | 1.890568265027259   | 1.666676e-05 | 0.026400155          |
| 73 | trans_NEG | REACTOME_SIGNALING_BY_IL5                                             | 26538      | 8266      | 108       | 33.016655        | 54             | 1.635538              | 2.3039862689589898  | 1.673789e-05 | 0.045125343          |
| 74 | cis_NEG   | TRANSMEMBRANE_RECEPTOR_PROTEIN_KINASE_ACTIVITY                        | 26538      | 4004      | 50        | 7.543899         | 20             | 2.651149              | 3.7650065266480301  | 1.684481e-05 | 0.026400587          |
| 75 | cis_POS   | BMI1_DN_MEL18_DN_V1_DN                                                | 26538      | 1529      | 140       | 8.066169         | 22             | 2.727441              | 3.07919853574808    | 1.696170e-05 | 0.012823949          |
| 76 | cis_NEG   | GCMF_SHH_UP_EARLY_V1_DN                                               | 26538      | 4004      | 165       | 24.894888        | 46             | 1.847770              | 2.18906595972923    | 1.718946e-05 | 0.012995234          |
| 77 | cis_NEG   | REACTOME_CHEMOKINE_RECEPTORS_BIND_CHEMOKINES                          | 26538      | 4004      | 54        | 8.147411         | 21             | 2.577506              | 3.5947545366692002  | 1.754421e-05 | 0.047299193          |
| 78 | trans_POS | PTEN_DN_V2_UP                                                         | 26538      | 7352      | 137       | 37.954028        | 61             | 1.607208              | 2.1037192638616902  | 1.784992e-05 | 0.013494537          |
| 79 | trans_NEG | PRC2_EZH2_UP_V1_DN                                                    | 26538      | 8266      | 188       | 58.557842        | 86             | 1.468633              | 1.8728812022085     | 1.796525e-05 | 0.013581727          |
| 80 | cis_NEG   | REACTOME_INTERFERON_SIGNALING                                         | 26538      | 4004      | 151       | 22.782576        | 43             | 1.887407              | 2.25410882419704    | 1.810454e-05 | 0.048808832          |
| 81 | trans_NEG | PHOSPHOTRANSFERASE_ACTIVITY_ALCOHOL_GROUP_AS_ACCEPTOR                 | 26538      | 8266      | 331       | 103.099179       | 139            | 1.348216              | 1.61054986256535    | 1.825293e-05 | 0.028912639          |
| 82 | cis_NEG   | KEGG_HYPERTROPHIC_CARDIOMYOPATHY_HCM                                  | 26538      | 4004      | 83        | 12.522873        | 28             | 2.235899              | 2.8780746571578     | 1.826088e-05 | 0.013368607          |
| 83 | cis_NEG   | IL21_UP_V1_DN                                                         | 26538      | 4004      | 180       |                  |                |                       |                     |              |                      |

|    | set1_Name | set2_Name                                  | Background | set1_size | set2_size | expected_overlap | actual_overlap | enrichment_foldchange | odds_ratio          | FET_pvalue   | corrected_FET_pvalue |
|----|-----------|--------------------------------------------|------------|-----------|-----------|------------------|----------------|-----------------------|---------------------|--------------|----------------------|
| 1  | trans_POS | BIOCARTA_NKT_PATHWAY                       | 26538      | 7352      | 29        | 8.034064         | 19             | 2.364930              | 4.968225059190803   | 2.429786e-05 | 0.021090547          |
| 2  | trans_NEG | BIOCARTA_CTLA4_PATHWAY                     | 26538      | 8266      | 19        | 5.918080         | 15             | 2.534606              | 8.3018730436071563  | 2.447574e-05 | 0.021244944          |
| 3  | trans_POS | KRAS_DF.V1_DN                              | 26538      | 7352      | 190       | 52.636973        | 79             | 1.500846              | 1.86647226737511    | 2.514086e-05 | 0.019006468          |
| 4  | cis_NEG   | EGF1_UP.V1_UP                              | 26538      | 4004      | 187       | 28.214183        | 50             | 1.772158              | 2.06725968480273    | 2.607966e-05 | 0.019716218          |
| 5  | trans_NEG | PRC2_EDD_UP.V1_UP                          | 26538      | 8266      | 187       | 58.246364        | 85             | 1.459319              | 1.8508837026015099  | 2.678974e-05 | 0.020253047          |
| 6  | cis_NEG   | ACTIN_CYTOSKELETON                         | 26538      | 4004      | 125       | 18.869748        | 37             | 1.961850              | 2.3790336944156999  | 2.683305e-05 | 0.020508406          |
| 7  | cis_NEG   | RB_DN.V1_DN                                | 26538      | 4004      | 125       | 18.859748        | 37             | 1.961850              | 2.3790336944156999  | 2.683305e-05 | 0.020285789          |
| 8  | cis_NEG   | KEGG_PHOSPHATIDYLINOSITOL_SIGNALING_SYSTEM | 26538      | 4004      | 76        | 11.466727        | 26             | 2.267430              | 2.9389192822094001  | 2.719923e-05 | 0.020233252          |
| 9  | trans_NEG | BASAL_LAMNA                                | 26538      | 8266      | 21        | 6.511035         | 16             | 2.446096              | 7.0847076022810098  | 2.815009e-05 | 0.026235603          |
| 10 | cis_NEG   | BIOCARTA_ASBCELL_PATHWAY                   | 26538      | 4004      | 11        | 1.659658         | 8              | 4.820271              | 15.032992481510499  | 2.864315e-05 | 0.024862253          |
| 11 | cis_NEG   | IMMUNOLOGICAL_SYNAPSE                      | 26538      | 4004      | 11        | 1.659658         | 8              | 4.820271              | 15.032992481510499  | 2.864315e-05 | 0.026895414          |
| 12 | trans_POS | KRAS_600_UP.V1_UP                          | 26538      | 7352      | 274       | 75.908056        | 107            | 1.409600              | 1.6819268109133301  | 2.885246e-05 | 0.021812458          |
| 13 | trans_NEG | PROTEIN_COMPLEX                            | 26538      | 8266      | 805       | 250.739694       | 304            | 1.212413              | 1.3543519320617099  | 2.967106e-05 | 0.027653431          |
| 14 | cis_NEG   | CYCLIN_D1_KE_V1_UP                         | 26538      | 4004      | 188       | 28.365061        | 50             | 1.762732              | 2.0521947703272199  | 3.038470e-05 | 0.022970831          |
| 15 | cis_NEG   | KEGG_LEISHMANIA_INFECTION                  | 26538      | 4004      | 68        | 10.259703        | 24             | 2.339249              | 3.0620464978899502  | 3.050891e-05 | 0.022735629          |
| 16 | cis_POS   | PRC2_EDH2_UP.V1_DN                         | 26538      | 1529      | 188       | 10.631713        | 26             | 2.400359              | 2.8529457955267302  | 3.113424e-05 | 0.023537484          |
| 17 | cis_POS   | HALLMARK_MYOGENESIS                        | 26538      | 1529      | 199       | 11.465483        | 27             | 2.354884              | 2.5955600719760001  | 3.122156e-05 | 0.006244313          |
| 18 | trans_POS | PS3_UP.V1_UP                               | 26538      | 7352      | 191       | 52.914010        | 79             | 1.492988              | 1.84971923895437    | 3.133405e-05 | 0.023688539          |
| 19 | trans_NEG | BIOCARTA_NKT_PATHWAY                       | 26538      | 8266      | 29        | 9.032859         | 20             | 2.214139              | 4.9213621010904296  | 3.134862e-05 | 0.027210606          |
| 20 | trans_POS | MEK_3UP.V1_UP                              | 26538      | 7352      | 194       | 53.745120        | 80             | 1.488507              | 1.84033864254399499 | 3.181053e-05 | 0.024048764          |
| 21 | cis_POS   | RECEPTOR_COMPLEX                           | 26538      | 4004      | 56        | 8.481617         | 21             | 2.485452              | 3.38903865358431    | 3.347156e-05 | 0.031195496          |
| 22 | trans_POS | ADHERENS_JUNCTION                          | 26538      | 7352      | 23        | 6.371844         | 16             | 2.511947              | 5.9741489144226803  | 3.586300e-05 | 0.033279718          |
| 23 | cis_NEG   | KEGG_INSULIN_SIGNALING_PATHWAY             | 26538      | 4004      | 136       | 20.519406        | 39             | 1.900640              | 2.27505030666940799 | 3.652531e-05 | 0.027174628          |
| 24 | trans_NEG | KRAS_DF.V1_UP                              | 26538      | 8266      | 191       | 59.482275        | 86             | 1.445566              | 1.81888374864367    | 3.705168e-05 | 0.028011074          |
| 25 | trans_POS | ATF2_UP.V1_DN                              | 26538      | 7352      | 183       | 50.697716        | 76             | 1.490981              | 1.86234334501836    | 3.715127e-05 | 0.02808363           |
| 26 | trans_POS | PROTEINACEOUS_EXTRACELLULAR_MATRIX         | 26538      | 7352      | 98        | 27.149597        | 46             | 1.694316              | 2.31669726862290201 | 3.755545e-05 | 0.030001681          |
| 27 | cis_NEG   | KEGG_APOPTOSIS                             | 26538      | 4004      | 86        | 12.975507        | 28             | 2.157912              | 2.72865152387753    | 3.814499e-05 | 0.028379875          |
| 28 | cis_POS   | BM1_DN.V1_DN                               | 26538      | 1529      | 137       | 7.883323         | 21             | 2.660477              | 2.9881788868947     | 3.822203e-05 | 0.028895857          |
| 29 | trans_POS | BIOCARTA_ATRRCA_PATHWAY                    | 26538      | 7352      | 21        | 5.817771         | 15             | 2.578307              | 6.5340071724083004  | 3.881552e-05 | 0.033691874          |
| 30 | trans_NEG | IL21_UP.V1_UP                              | 26538      | 8266      | 178       | 55.443063        | 81             | 1.460568              | 1.854302723159498   | 3.891639e-05 | 0.029420789          |
| 31 | cis_NEG   | WNT1_UP.V1_UP                              | 26538      | 4004      | 175       | 26.403648        | 47             | 1.780057              | 2.0791104868741801  | 3.968199e-05 | 0.029999588          |
| 32 | cis_NEG   | PRC1_BMI_UP.V1_UP                          | 26538      | 4004      | 180       | 27.158038        | 48             | 1.767433              | 2.0591643718676602  | 4.024440e-05 | 0.030424765          |
| 33 | cis_NEG   | ESC_V6.5_UP.LATE.V1_DN                     | 26538      | 4004      | 180       | 27.158038        | 48             | 1.767433              | 2.0591643718676602  | 4.024440e-05 | 0.030424765          |
| 34 | cis_NEG   | IL15_UP.V1_UP                              | 26538      | 4004      | 180       | 27.158038        | 48             | 1.767433              | 2.0591643718676602  | 4.024440e-05 | 0.030424765          |
| 35 | trans_NEG | NFE2L2_V2                                  | 26538      | 8266      | 442       | 137.673223       | 177            | 1.285633              | 1.4688602382020099  | 4.046432e-05 | 0.030591024          |
| 36 | cis_NEG   | BIOCARTA_T081_PATHWAY                      | 26538      | 4004      | 20        | 3.017560         | 11             | 3.645330              | 6.8938988078174387  | 4.050812e-05 | 0.035159314          |
| 37 | cis_NEG   | RUFFLE                                     | 26538      | 4004      | 30        | 4.526340         | 14             | 3.093007              | 4.9378624023065099  | 4.075650e-05 | 0.037985055          |
| 38 | trans_POS | BIOCARTA_CTLA4_PATHWAY                     | 26538      | 7352      | 19        | 5.263697         | 14             | 2.659727              | 7.31778418961949    | 4.082471e-05 | 0.035435852          |
| 39 | cis_POS   | RAF_UP.V1_UP                               | 26538      | 1529      | 191       | 11.004559        | 26             | 2.362657              | 2.6044565552619199  | 4.100121e-05 | 0.030986915          |
| 40 | trans_POS | SPINDLE                                    | 26538      | 7352      | 39        | 10.804431        | 23             | 2.128756              | 3.75974883077887201 | 4.152734e-05 | 0.038703478          |
| 41 | cis_NEG   | EXTRACELLULAR_REGION_PART                  | 26538      | 4004      | 329       | 49.638857        | 77             | 1.551204              | 1.7336913942769101  | 4.212241e-05 | 0.039258000          |
| 42 | trans_NEG | SNF5_DN.V1_DN                              | 26538      | 8266      | 180       | 49.636461        | 74             | 1.484857              | 1.9102420724905701  | 4.247873e-05 | 0.032114675          |
| 43 | trans_NEG | CYCLIN_D1_KE_V1_DN                         | 26538      | 8266      | 189       | 58.869319        | 85             | 1.443876              | 1.8148995359162901  | 4.314919e-05 | 0.032620784          |
| 44 | trans_POS | KRAS_PROSTATE_UP.V1_UP                     | 26538      | 7352      | 132       | 36.568845        | 58             | 1.586050              | 2.05370327828959    | 4.522043e-05 | 0.034186649          |
| 45 | cis_NEG   | KEGG_ACUTE_MYELOID_LEUKEMIA                | 26538      | 4004      | 57        | 8.600045         | 21             | 2.441848              | 3.2847552277494001  | 4.550662e-05 | 0.033856026          |
| 46 | trans_NEG | CYCLIN_D1_UP.V1_UP                         | 26538      | 8266      | 184       | 57.311930        | 83             | 1.448215              | 1.8246867244026701  | 4.627054e-05 | 0.034890525          |
| 47 | trans_POS | PRC2_EDD_UP.V1_UP                          | 26538      | 7352      | 187       | 51.805863        | 77             | 1.486318              | 1.8353661725031101  | 4.694729e-05 | 0.035492148          |
| 48 | trans_POS | ESC_J1_UP.LATE.V1_UP                       | 26538      | 7352      | 187       | 51.805863        | 77             | 1.486318              | 1.8353661725031101  | 4.694729e-05 | 0.035492148          |
| 49 | trans_POS | CAHOY_OUGOENDENDROCYTIC                    | 26538      | 7352      | 96        | 26.595523        | 45             | 1.692014              | 2.3105777775231999  | 4.730707e-05 | 0.035764149          |
| 50 | trans_NEG | CELL_JUNCTION                              | 26538      | 8266      | 82        | 25.541186        | 43             | 1.683555              | 2.44465915449427    | 4.844889e-05 | 0.045154364          |
| 51 | trans_POS | HALLMARK_MITOTIC_SPINDLE                   | 26538      | 7352      | 199       | 55.130304        | 81             | 1.469246              | 1.8000678703213699  | 4.916895e-05 | 0.008833789          |
| 52 | trans_POS | EXTRACELLULAR_MATRIX                       | 26538      | 7352      | 99        | 27.428634        | 46             | 1.677202              | 2.2728749652652298  | 5.143925e-05 | 0.047941381          |
| 53 | cis_NEG   | RB_P107_DN.V1_UP                           | 26538      | 4004      | 138       | 20.821162        | 39             | 1.873094              | 2.2289282854388102  | 5.215595e-05 | 0.039429681          |
| 54 | cis_NEG   | KRAS_LUNG_BREAST_UP.V1_UP                  | 26538      | 4004      | 138       | 20.821162        | 39             | 1.873094              | 2.2289282854388102  | 5.215595e-05 | 0.039429681          |
| 55 | cis_POS   | KRAS_PROSTATE_UP.V1_DN                     | 26538      | 1529      | 140       | 8.066169         | 21             | 2.803468              | 2.9125041392447302  | 5.297853e-05 | 0.040051768          |
| 56 | trans_NEG | KRAS_KIDNEY_UP.V1_UP                       | 26538      | 8266      | 143       | 44.541337        | 67             | 1.504221              | 1.95650064875117899 | 5.826720e-05 | 0.040500007          |
| 57 | cis_NEG   | KEGG_PROSTATE_CANCER                       | 26538      | 4004      | 88        | 13.277263        | 28             | 2.108868              | 2.6375961169508302  | 6.063282e-05 | 0.045110821          |
| 58 | trans_NEG | RELA_DN.V1_DN                              | 26538      | 8266      | 138       | 42.983948        | 65             | 1.512192              | 1.97594617759636    | 6.107170e-05 | 0.046170206          |
| 59 | cis_NEG   | PKC4_DN.V1_UP                              | 26538      | 4004      | 168       | 25.347502        | 45             | 1.775323              | 2.0709769576492199  | 6.132978e-05 | 0.046365314          |
| 60 | trans_NEG | KEGG_DILATED_CARDIOMYOPATHY                | 26538      | 8266      | 90        | 28.033009        | 46             | 1.649923              | 2.3162592879980701  | 6.177265e-05 | 0.046598651          |
| 61 | cis_NEG   | PTEN_DN.V2_DN                              | 26538      | 4004      | 139       | 20.972040        | 39             | 1.859619              | 2.20654392531481    | 6.206216e-05 | 0.046918990          |
| 62 | cis_NEG   | KEGG_DORSO_VENTRAL_AXIS_FORMATION          | 26538      | 4004      | 24        | 3.621072         | 12             | 3.313936              | 5.64126674824261    | 6.231310e-05 | 0.046360945          |
| 63 | trans_NEG | ESC_V6.5_UP.LATE.V1_DN                     | 26538      | 8266      | 180       | 56.066019        | 81             | 1.444725              | 1.8164518960573801  | 6.280445e-05 | 0.047480167          |
| 64 | cis_NEG   | PRC2_SUZ12_UP.V1_DN                        | 26538      | 4004      | 183       | 27.610871        | 48             | 1.738458              | 2.0131595042178398  | 6.311785e-05 | 0.047716945          |
| 65 | cis_POS   | ESC_V6.5_UP.LATE.V1_UP                     | 26538      | 1529      | 185       | 10.668867        | 25             | 2.345465              | 2.5813668653087002  | 6.450207e-05 | 0.048763664          |
| 66 | trans_NEG | HALLMARK_GLYCOLYSIS                        | 26538      | 8266      | 200       | 62.295576        | 88             | 1.412620              | 1.74472633867596    | 6.478075e-05 | 0.016921150          |
| 67 | trans_NEG | HALLMARK_TNFA_SIGNALING_VIA_NFKB           | 26538      | 8266      | 200       | 62.295576        | 87             | 1.386568              | 1.7093286210145799  | 1.502414e-04 | 0.030048278          |
| 68 | cis_NEG   | HALLMARK_PEROXISOME                        | 26538      | 4004      | 102       | 15.389555        | 30             | 1.949374              | 2.3550002240229402  | 1.683351e-04 | 0.033667018          |
| 69 | trans_NEG | HALLMARK_PS3_PATHWAY                       | 26538      | 8266      | 199       | 61.984098        | 86             | 1.387463              | 1.6894732074443899  | 2.134498e-04 | 0.042689963          |
| 70 | trans_POS | HALLMARK_ESTROGEN_RESPONSE_EARLY           | 26538      | 7352      | 198       | 54.883267        | 78             | 1.421975              | 1.70368732922322    | 2.349156e-04 | 0.046983117          |

Supporting Material 7C: Modules enriched with meSCGs

|    | module | methylation_signature | Background | set1_size | set2_size | expected_overlap | actual_overlap | enrichment_foldchange | odds_ratio   | FET_pvalue    | corrected_FET_pvalue |
|----|--------|-----------------------|------------|-----------|-----------|------------------|----------------|-----------------------|--------------|---------------|----------------------|
| 1  | M6     | trans_NEG             | 26538      | 2273      | 8266      | 707.86922        | 1375           | 1.942120              | 3.860248     | 5.635937e-201 | 1.433306e-197        |
| 2  | M6     | trans_POS             | 26538      | 2273      | 7352      | 629.70442        | 1214           | 1.927889              | 3.385273     | 7.160354e-162 | 1.758583e-158        |
| 3  | M6     | cis_NEG               | 26538      | 2273      | 4004      | 342.94566        | 695            | 2.026560              | 2.789121     | 2.565090e-96  | 6.298837e-83         |
| 4  | M106   | trans_NEG             | 26538      | 547       | 8266      | 170.37840        | 387            | 2.271415              | 5.559260     | 2.685184e-82  | 6.554813e-79         |
| 5  | M378   | trans_NEG             | 26538      | 462       | 8266      | 143.30278        | 342            | 2.376805              | 6.527684     | 2.525700e-81  | 6.203119e-78         |
| 6  | M106   | trans_POS             | 26538      | 547       | 7352      | 151.53908        | 362            | 2.388823              | 5.318698     | 8.532897e-80  | 2.095679e-76         |
| 7  | M378   | trans_POS             | 26538      | 462       | 7352      | 127.99096        | 320            | 2.500177              | 6.102490     | 3.513064e-78  | 8.628985e-75         |
| 8  | M102   | trans_POS             | 26538      | 322       | 7352      | 89.20582         | 249            | 2.791298              | 9.176935     | 3.018654e-77  | 7.413813e-74         |
| 9  | M102   | trans_NEG             | 26538      | 322       | 8266      | 100.29588        | 257            | 2.562418              | 8.987490     | 2.882464e-73  | 7.079331e-70         |
| 10 | M111   | trans_NEG             | 26538      | 787       | 8266      | 245.13309        | 479            | 1.954041              | 3.587430     | 4.586695e-68  | 1.126482e-64         |
| 11 | M109   | trans_NEG             | 26538      | 865       | 8266      | 269.42837        | 509            | 1.889185              | 3.302026     | 1.850560e-65  | 4.544970e-62         |
| 12 | M111   | trans_POS             | 26538      | 787       | 7352      | 218.02788        | 430            | 1.972225              | 3.275970     | 1.424693e-58  | 3.489454e-55         |
| 13 | M109   | trans_POS             | 26538      | 865       | 7352      | 239.83675        | 460            | 1.919572              | 3.094955     | 4.902986e-58  | 1.204173e-54         |
| 14 | M378   | cis_NEG               | 26538      | 462       | 4004      | 69.70563         | 212            | 3.041361              | 4.983012     | 7.177865e-57  | 1.762835e-53         |
| 15 | M399   | trans_NEG             | 26538      | 644       | 8266      | 200.59176        | 390            | 1.944247              | 3.512429     | 1.254216e-54  | 3.080354e-51         |
| 16 | M633   | trans_NEG             | 26538      | 387       | 8266      | 120.54194        | 268            | 2.223293              | 5.111245     | 3.645395e-54  | 8.953091e-51         |
| 17 | M357   | trans_POS             | 26538      | 138       | 7352      | 38.23106         | 123            | 3.217279              | 21.745322    | 4.841170e-52  | 1.188991e-48         |
| 18 | M384   | trans_NEG             | 26538      | 442       | 8266      | 137.67322        | 291            | 2.113701              | 4.378678     | 1.497771e-51  | 3.678525e-48         |
| 19 | M635   | trans_NEG             | 26538      | 499       | 8266      | 155.42746        | 317            | 2.036537              | 3.964012     | 6.068380e-51  | 1.490394e-47         |
| 20 | M26    | trans_NEG             | 26538      | 820       | 8266      | 255.41186        | 460            | 1.801013              | 2.931913     | 6.288655e-51  | 1.546850e-47         |
| 21 | M106   | cis_NEG               | 26538      | 547       | 4004      | 82.53026         | 226            | 2.738390              | 4.139428     | 8.810243e-51  | 2.163796e-47         |
| 22 | M105   | trans_NEG             | 26538      | 328       | 8266      | 102.16474        | 230            | 2.251286              | 5.306983     | 4.135910e-48  | 1.015779e-44         |
| 23 | M357   | trans_NEG             | 26538      | 138       | 8266      | 42.98395         | 124            | 2.884788              | 19.850441    | 2.569197e-47  | 6.309460e-44         |
| 24 | M399   | trans_POS             | 26538      | 644       | 7352      | 178.41164        | 350            | 1.961755              | 3.211779     | 5.038952e-47  | 1.237567e-43         |
| 25 | M633   | trans_POS             | 26538      | 387       | 7352      | 107.21320        | 239            | 2.229203              | 4.321848     | 5.488866e-45  | 1.350522e-41         |
| 26 | M635   | trans_POS             | 26538      | 499       | 7352      | 138.24131        | 286            | 2.068846              | 3.605148     | 1.719481e-44  | 4.223046e-41         |
| 27 | M112   | trans_POS             | 26538      | 603       | 7352      | 167.05313        | 323            | 1.933517              | 3.102613     | 1.032415e-41  | 2.535611e-38         |
| 28 | M384   | trans_POS             | 26538      | 442       | 7352      | 122.45022        | 257            | 2.088812              | 3.720134     | 1.388996e-41  | 3.362254e-38         |
| 29 | M116   | trans_NEG             | 26538      | 454       | 8266      | 141.41096        | 278            | 1.955901              | 3.578094     | 1.994543e-40  | 4.888585e-37         |
| 30 | M112   | trans_NEG             | 26538      | 603       | 8266      | 187.82116        | 339            | 1.804908              | 2.916976     | 6.026384e-38  | 1.480080e-34         |
| 31 | M403   | trans_POS             | 26538      | 285       | 7352      | 78.95546         | 181            | 2.252432              | 4.630743     | 1.083560e-36  | 2.661224e-33         |
| 32 | M403   | trans_NEG             | 26538      | 285       | 8266      | 88.77120         | 192            | 2.162864              | 4.648080     | 1.698827e-36  | 4.174776e-33         |
| 33 | M26    | trans_POS             | 26538      | 820       | 7352      | 227.17010        | 391            | 1.721177              | 2.455616     | 3.969468e-35  | 9.749041e-32         |
| 34 | M105   | trans_POS             | 26538      | 328       | 7352      | 90.86804         | 197            | 2.167979              | 4.004646     | 7.442228e-35  | 1.827811e-31         |
| 35 | M729   | trans_NEG             | 26538      | 339       | 8266      | 105.59100        | 215            | 2.036158              | 3.907842     | 9.731584e-35  | 2.390077e-31         |
| 36 | M112   | cis_POS               | 26538      | 603       | 1529      | 34.74214         | 121            | 3.482902              | 2.860373e-34 | 7.025076e-31  |                      |
| 37 | M209   | trans_NEG             | 26538      | 243       | 8266      | 75.68913         | 187            | 2.206394              | 4.036510     | 1.482835e-33  | 3.641842e-30         |
| 38 | M367   | trans_POS             | 26538      | 134       | 7352      | 37.12292         | 104            | 2.801504              | 9.160920     | 3.374124e-33  | 8.288484e-30         |
| 39 | M116   | trans_POS             | 26538      | 454       | 7352      | 125.77466        | 246            | 1.955879              | 3.158359     | 4.764666e-33  | 1.170202e-29         |
| 40 | M367   | trans_NEG             | 26538      | 134       | 8266      | 41.73804         | 106            | 2.539650              | 8.683255     | 2.619496e-30  | 6.433482e-27         |
| 41 | M113   | trans_NEG             | 26538      | 318       | 8266      | 99.04997         | 196            | 1.978759              | 3.613055     | 2.153803e-29  | 5.289961e-26         |
| 42 | M729   | trans_POS             | 26538      | 339       | 7352      | 93.91544         | 192            | 2.044392              | 3.473096     | 2.494311e-29  | 6.126028e-26         |
| 43 | M101   | cis_POS               | 26538      | 787       | 1529      | 45.34339         | 132            | 2.811119              | 3.512941     | 4.387994e-29  | 1.080147e-25         |
| 44 | M627   | trans_NEG             | 26538      | 134       | 8266      | 41.73804         | 104            | 2.491732              | 7.747237     | 1.694951e-28  | 4.162891e-25         |
| 45 | M104   | trans_POS             | 26538      | 244       | 7352      | 67.59696         | 150            | 2.219035              | 4.229890     | 2.142344e-28  | 5.261597e-25         |
| 46 | M534   | trans_NEG             | 26538      | 186       | 8266      | 57.93489         | 131            | 2.261159              | 5.332969     | 2.907022e-28  | 7.138646e-25         |
| 47 | M399   | cis_POS               | 26538      | 644       | 1529      | 37.10438         | 114            | 3.072414              | 3.720405     | 2.803031e-27  | 6.884245e-24         |
| 48 | M355   | cis_NEG               | 26538      | 183       | 4004      | 27.61067         | 87             | 3.150956              | 5.190941     | 2.250174e-25  | 5.526427e-22         |
| 49 | M121   | cis_NEG               | 26538      | 194       | 4004      | 29.27033         | 90             | 3.074786              | 4.998959     | 3.091542e-25  | 7.552826e-22         |
| 50 | M101   | cis_NEG               | 26538      | 236       | 4004      | 35.60720         | 100            | 2.808420              | 4.218413     | 4.173652e-24  | 1.025049e-20         |
| 51 | M209   | trans_POS             | 26538      | 243       | 7352      | 67.31992         | 142            | 2.109331              | 3.721323     | 7.476159e-24  | 1.836145e-20         |
| 52 | M104   | trans_NEG             | 26538      | 244       | 8266      | 76.00060         | 152            | 1.999984              | 3.701571     | 8.712165e-24  | 2.139708e-20         |
| 53 | M355   | trans_NEG             | 26538      | 183       | 8266      | 57.00045         | 123            | 2.157878              | 4.584600     | 9.663006e-24  | 2.373248e-20         |
| 54 | M627   | trans_POS             | 26538      | 134       | 7352      | 37.12292         | 93             | 2.505191              | 5.981974     | 1.045920e-23  | 2.712878e-20         |
| 55 | M137   | cis_NEG               | 26538      | 243       | 4004      | 36.66335         | 101            | 2.754795              | 4.080470     | 1.471329e-23  | 3.613584e-20         |
| 56 | M403   | cis_POS               | 26538      | 285       | 1529      | 16.42042         | 67             | 4.080286              | 5.210655     | 1.947934e-23  | 4.784126e-20         |
| 57 | M534   | trans_POS             | 26538      | 186       | 7352      | 51.52883         | 116            | 2.251167              | 4.377481     | 4.900300e-23  | 1.203514e-19         |
| 58 | M635   | cis_POS               | 26538      | 499       | 1529      | 26.75013         | 90             | 3.130420              | 3.761086     | 2.673637e-22  | 6.320852e-19         |
| 59 | M113   | trans_POS             | 26538      | 318       | 7352      | 88.09767         | 169            | 1.918325              | 3.006013     | 6.434410e-22  | 1.580129e-18         |
| 60 | M139   | cis_NEG               | 26538      | 86        | 4004      | 12.97551         | 52             | 4.007551              | 8.706200     | 6.874186e-22  | 1.668300e-18         |
| 61 | M475   | cis_NEG               | 26538      | 154       | 4004      | 23.23521         | 73             | 3.141784              | 5.147279     | 1.987480e-21  | 4.881251e-18         |
| 62 | M126   | cis_NEG               | 26538      | 246       | 4004      | 37.11598         | 98             | 2.640372              | 3.794756     | 2.718895e-21  | 6.677606e-18         |
| 63 | M211   | trans_NEG             | 26538      | 172       | 8266      | 53.57420         | 113            | 2.109224              | 4.278254     | 1.030670e-20  | 2.531320e-17         |
| 64 | M367   | cis_NEG               | 26538      | 134       | 4004      | 20.21765         | 66             | 3.264474              | 5.536643     | 1.205350e-20  | 2.960339e-17         |
| 65 | M627   | cis_NEG               | 26538      | 134       | 4004      | 20.21765         | 66             | 3.264474              | 5.536643     | 1.205350e-20  | 2.960339e-17         |
| 66 | M400   | trans_POS             | 26538      | 112       | 7352      | 31.02811         | 78             | 2.513849              | 6.038809     | 3.068886e-20  | 7.538640e-17         |
| 67 | M109   | cis_NEG               | 26538      | 865       | 4004      | 130.50946        | 233            | 1.785311              | 2.141176     | 4.667011e-20  | 1.146218e-16         |
| 68 | M388   | trans_NEG             | 26538      | 130       | 8266      | 40.49212         | 91             | 2.247351              | 5.203411     | 8.818287e-20  | 2.165771e-16         |
| 69 | M102   | cis_NEG               | 26538      | 322       | 4004      | 46.58271         | 114            | 2.348514              | 3.145408     | 1.077022e-19  | 2.645165e-16         |
| 70 | M409   | trans_NEG             | 26538      | 117       | 8266      | 36.44291         | 84             | 2.304975              | 5.673549     | 1.722225e-19  | 4.229784e-16         |
| 71 | M373   | trans_NEG             | 26538      | 71        | 8266      | 22.11493         | 59             | 2.667881              | 10.95538     | 1.836729e-19  | 4.511007e-16         |
| 72 | M109   | cis_POS               | 26538      | 865       | 1529      | 49.83740         | 120            | 2.407830              | 2.773700     | 2.229772e-19  | 5.476321e-16         |
| 73 | M423   | trans_POS             | 26538      | 153       | 7352      | 42.38662         | 95             | 2.241274              | 4.316929     | 6.127212e-19  | 1.504843e-15         |
| 74 | M423   | trans_NEG             | 26538      | 153       | 8266      | 47.65612         | 101            | 2.118350              | 4.333971     | 6.816761e-19  | 1.674198e-15         |
| 75 | M185   | trans_POS             | 26538      | 225       | 7352      | 62.53326         | 125            | 2.005350              | 3.309023     | 1.199186e-18  | 2.945200e-15         |
| 76 | M386   | trans_POS             | 26538      | 130       | 7352      | 36.01477         | 84             | 2.332376              | 4.808622     | 1.772026e-18  | 4.352095e-15         |
| 77 | M478   | cis_NEG               | 26538      | 68        | 4004      | 10.25970         | 42             | 4.093686              | 9.175639     | 1.916497e-18  | 4.708917e-15         |
| 78 | M101   | trans_NEG             | 26538      | 236       | 8266      | 73.50878         | 137            | 1.863723              | 3.093529     | 9.922599e-18  | 2.436990e-14         |
| 79 | M400   | trans_NEG             | 26538      | 112       | 8266      | 34.88502         | 79             | 2.264550              | 5.332526     | 1.127441e-17  | 2.768995e-14         |
| 80 | M28    | cis_NEG               | 26538      | 244       | 4004      | 36.81423         | 91             | 2.471870              | 3.401670     | 1.160482e-17  | 2.850143e-14         |
| 81 | M700   | trans_POS             | 26538      | 180       | 7352      | 49.86661         | 104            | 2.085564              | 3.607754     | 2.245046e-17  | 5.513833e-14         |
| 82 | M226   | cis_NEG               | 26538      | 223       | 4004      | 33.64579         | 85             | 2.526319              | 3.519716     | 2.914954e-17  | 7.159128e-14         |
| 83 | M373   | trans_POS             | 26538      | 71        | 7352      | 19.66961         | 54             | 2.745352              | 8.342207     | 3.341593e-17  | 8.206952e-14         |
| 84 | M640   | trans_POS             | 26538      | 85        | 7352      | 23.54812         | 61             | 2.590440              | 6.678535     | 3.779805e-17  | 9.283201e-14         |
| 85 | M409   | trans_POS             | 26538      | 117       | 7352      | 32.41329         | 76             | 2.344717              | 4.877128     | 4.747028e-17  | 1.165870e-13         |
| 86 | M727   | trans_NEG             | 26538      | 110       | 8266      | 34.26257         | 77             | 2.247351              | 5.196232     | 5.854297e-17  | 1.437815e-13         |
| 87 | M9     | cis_NEG               | 26538      | 91        | 4004      | 13.72990         | 48             | 3.496020              | 6.345677     | 5.952784e-17  | 1.462004e-13         |
| 88 | M104   | cis_NEG               | 26538      | 244       | 4004      | 36.81423         | 89             | 2.417544              | 3.282012     | 1.320718e-16  | 3.243684e-13         |
| 89 | M727   | trans_POS             | 26538      | 110       | 7352      | 30.47404         | 72             | 2.362867              | 4.983244     | 1.698838e-16  | 4.171850e-13         |
| 90 | M620   | cis_NEG               | 26538      | 117       | 4004      | 17.65272         | 55             | 3.115686              | 5.047735     | 2.853620e-16  | 6.517290e-13         |
| 91 | M513   | trans_POS             | 26538      | 188       | 7352      | 52.08290         | 105            | 2.016017              | 3.334407     | 4.084872e-16  | 1.005701e-12         |
| 92 | M358   | trans_NEG             | 26538      | 65        |           |                  |                |                       |              |               |                      |

|    | module | methylation_signature | Background | set1_size | set2_size | expected_overlap | actual_overlap | enrichment.foldchange | odds_ratio | FET_pvalue   | corrected_FET_pvalue |
|----|--------|-----------------------|------------|-----------|-----------|------------------|----------------|-----------------------|------------|--------------|----------------------|
| 1  | M427   | trans_NEG             | 26538      | 499       | 8266      | 155.427463       | 238            | 1.531261              | 2.045816   | 4.958807e-15 | 1.217883e-11         |
| 2  | M410   | trans_NEG             | 26538      | 172       | 8266      | 53.574195        | 103            | 1.922567              | 3.328793   | 6.300024e-15 | 1.547286e-11         |
| 3  | M729   | cis_POS               | 26538      | 339       | 1529      | 19.531653        | 60             | 3.071937              | 3.620006   | 6.505241e-15 | 1.597687e-11         |
| 4  | M469   | trans_POS             | 26538      | 316       | 7352      | 87.543598        | 151            | 1.724855              | 2.417237   | 1.925239e-14 | 4.728384e-11         |
| 5  | M437   | cis_NEG               | 26538      | 76        | 4004      | 11.466727        | 40             | 3.488354              | 6.305518   | 2.530019e-14 | 6.213727e-11         |
| 6  | M700   | trans_NEG             | 26538      | 180       | 8266      | 56.066019        | 105            | 1.872792              | 3.121502   | 3.988555e-14 | 9.820450e-11         |
| 7  | M458   | cis_NEG               | 26538      | 101       | 4004      | 15.238677        | 47             | 3.084257              | 4.944336   | 6.171925e-14 | 1.515825e-10         |
| 8  | M438   | cis_NEG               | 26538      | 112       | 4004      | 16.898334        | 50             | 2.958871              | 4.583188   | 7.538053e-14 | 1.851591e-10         |
| 9  | M633   | cis_POS               | 26538      | 387       | 1529      | 22.297196        | 63             | 2.825467              | 3.273863   | 7.573376e-14 | 1.860012e-10         |
| 10 | M357   | cis_NEG               | 26538      | 138       | 4004      | 20.821162        | 57             | 2.737589              | 4.002911   | 8.545940e-14 | 2.123433e-10         |
| 11 | M384   | cis_NEG               | 26538      | 442       | 4004      | 66.688070        | 127            | 1.904389              | 2.310490   | 1.172811e-13 | 2.880423e-10         |
| 12 | M301   | trans_POS             | 26538      | 113       | 7352      | 31.305147        | 69             | 2.204110              | 4.121363   | 1.222538e-13 | 3.002554e-10         |
| 13 | M212   | trans_NEG             | 26538      | 127       | 8266      | 39.557691        | 80             | 2.022363              | 3.785271   | 1.368165e-13 | 3.360213e-10         |
| 14 | M119   | cis_NEG               | 26538      | 181       | 4004      | 27.308916        | 67             | 2.453411              | 3.346669   | 3.274929e-13 | 8.043226e-10         |
| 15 | M469   | trans_NEG             | 26538      | 316       | 8266      | 98.427010        | 160            | 1.625570              | 2.292141   | 3.391989e-13 | 8.330724e-10         |
| 16 | M212   | trans_POS             | 26538      | 127       | 7352      | 35.183661        | 74             | 2.103249              | 3.670296   | 4.823872e-13 | 1.184743e-09         |
| 17 | M249   | trans_POS             | 26538      | 113       | 7352      | 31.305147        | 68             | 2.172167              | 3.970857   | 4.963805e-13 | 1.224022e-09         |
| 18 | M659   | trans_NEG             | 26538      | 478       | 8266      | 148.886427       | 223            | 1.497786              | 1.958996   | 6.148699e-13 | 1.510121e-09         |
| 19 | M513   | trans_NEG             | 26538      | 188       | 8266      | 58.557842        | 106            | 1.810176              | 2.881479   | 6.354082e-13 | 1.561562e-09         |
| 20 | M170   | trans_NEG             | 26538      | 72        | 8266      | 22.426407        | 52             | 2.318895              | 5.776893   | 9.077849e-13 | 2.229471e-09         |
| 21 | M384   | cis_POS               | 26538      | 442       | 1529      | 25.466049        | 66             | 2.591686              | 2.955287   | 1.192988e-12 | 2.929878e-09         |
| 22 | M400   | cis_NEG               | 26538      | 112       | 4004      | 16.898334        | 48             | 2.840517              | 4.259862   | 1.508528e-12 | 3.704944e-09         |
| 23 | M170   | trans_POS             | 26538      | 72        | 7352      | 19.946643        | 48             | 2.406420              | 5.246825   | 6.579693e-12 | 1.615973e-08         |
| 24 | M210   | trans_NEG             | 26538      | 59        | 8266      | 16.377195        | 44             | 2.394272              | 6.512823   | 8.429101e-12 | 2.069942e-08         |
| 25 | M116   | cis_POS               | 26538      | 454       | 1529      | 26.157435        | 65             | 2.484953              | 2.809856   | 1.180039e-11 | 2.898175e-08         |
| 26 | M633   | cis_NEG               | 26538      | 387       | 4004      | 58.389781        | 109            | 1.866765              | 2.240293   | 2.437298e-11 | 5.988005e-08         |
| 27 | M634   | trans_NEG             | 26538      | 100       | 8266      | 31.147788        | 63             | 2.022616              | 3.764782   | 5.175504e-11 | 1.271104e-07         |
| 28 | M139   | cis_POS               | 26538      | 86        | 1529      | 4.954933         | 24             | 4.843658              | 6.415806   | 5.843481e-11 | 1.435159e-07         |
| 29 | M784   | trans_NEG             | 26538      | 67        | 8266      | 20.869018        | 47             | 2.252142              | 5.217983   | 5.971586e-11 | 1.466621e-07         |
| 30 | M10    | cis_NEG               | 26538      | 142       | 4004      | 21.424674        | 53             | 2.473763              | 3.382758   | 6.496922e-11 | 1.596444e-07         |
| 31 | M387   | trans_POS             | 26538      | 50        | 7352      | 13.851835        | 36             | 2.598934              | 6.737230   | 9.515023e-11 | 2.338890e-07         |
| 32 | M20    | trans_NEG             | 26538      | 496       | 8266      | 154.493029       | 222            | 1.436958              | 1.812678   | 9.953522e-11 | 2.348345e-07         |
| 33 | M600   | trans_POS             | 26538      | 48        | 7352      | 13.297762        | 35             | 2.632022              | 7.053476   | 9.716887e-11 | 2.388460e-07         |
| 34 | M121   | cis_POS               | 26538      | 194       | 1529      | 11.177406        | 37             | 3.310249              | 3.925480   | 1.083890e-10 | 2.662033e-07         |
| 35 | M372   | trans_NEG             | 26538      | 28        | 8266      | 8.721381         | 25             | 2.866519              | 18.472725  | 2.387155e-10 | 5.862853e-07         |
| 36 | M535   | trans_NEG             | 26538      | 25        | 8266      | 7.786947         | 23             | 2.953661              | 25.486483  | 3.233355e-10 | 7.941563e-07         |
| 37 | M784   | trans_POS             | 26538      | 67        | 7352      | 18.561459        | 43             | 2.316828              | 4.696917   | 5.152408e-10 | 1.265432e-06         |
| 38 | M355   | trans_POS             | 26538      | 183       | 7352      | 50.697716        | 90             | 1.775228              | 2.544257   | 5.283420e-10 | 1.297608e-06         |
| 39 | M103   | trans_NEG             | 26538      | 312       | 8266      | 97.181099        | 149            | 1.533220              | 2.039378   | 5.319064e-10 | 1.306362e-06         |
| 40 | M387   | trans_NEG             | 26538      | 50        | 8266      | 15.573894        | 37             | 2.375771              | 6.314562   | 5.679299e-10 | 1.394836e-06         |
| 41 | M435   | cis_NEG               | 26538      | 76        | 4004      | 11.466727        | 34             | 2.965101              | 4.586184   | 6.584150e-10 | 1.617067e-06         |
| 42 | M424   | trans_NEG             | 26538      | 111       | 8266      | 34.574045        | 66             | 1.908946              | 3.259951   | 6.636855e-10 | 1.630012e-06         |
| 43 | M114   | trans_POS             | 26538      | 112       | 7352      | 31.028111        | 62             | 1.988188              | 3.254780   | 6.657705e-10 | 1.635133e-06         |
| 44 | M622   | trans_NEG             | 26538      | 56        | 8266      | 17.442761        | 40             | 2.23215               | 5.547599   | 6.715642e-10 | 1.649362e-06         |
| 45 | M14    | trans_NEG             | 26538      | 280       | 8266      | 87.213807        | 136            | 1.559386              | 2.105676   | 7.353974e-10 | 1.808139e-06         |
| 46 | M131   | trans_POS             | 26538      | 384       | 7352      | 106.382084       | 161            | 1.513413              | 1.903929   | 1.133771e-09 | 2.784541e-06         |
| 47 | M656   | trans_NEG             | 26538      | 55        | 8266      | 17.131283        | 39             | 2.276537              | 5.408320   | 1.552078e-09 | 3.811898e-06         |
| 48 | M131   | trans_NEG             | 26538      | 384       | 8266      | 119.607506       | 175            | 1.463119              | 1.869346   | 1.721446e-09 | 4.227872e-06         |
| 49 | M651   | trans_NEG             | 26538      | 78        | 8266      | 24.295275        | 50             | 2.058013              | 3.964807   | 2.072536e-09 | 5.090148e-06         |
| 50 | M403   | cis_NEG               | 26538      | 285       | 4004      | 43.000226        | 82             | 1.908967              | 2.299857   | 2.329493e-09 | 5.721235e-06         |
| 51 | M622   | trans_POS             | 26538      | 56        | 7352      | 15.514055        | 37             | 2.384934              | 5.102213   | 2.496085e-09 | 6.130318e-06         |
| 52 | M642   | trans_POS             | 26538      | 52        | 7352      | 14.405909        | 35             | 2.429559              | 5.393303   | 3.185640e-09 | 7.823832e-06         |
| 53 | M378   | cis_POS               | 26538      | 482       | 1529      | 26.618359        | 60             | 2.254083              | 2.499987   | 3.469086e-09 | 8.520076e-06         |
| 54 | M155   | cis_NEG               | 26538      | 99        | 4004      | 14.936921        | 39             | 2.610980              | 3.684034   | 3.474429e-09 | 8.533188e-06         |
| 55 | M422   | trans_POS             | 26538      | 30        | 7352      | 8.311101         | 24             | 2.887704              | 10.468213  | 3.807179e-09 | 9.350431e-06         |
| 56 | M424   | trans_POS             | 26538      | 111       | 7352      | 30.751074        | 60             | 1.951151              | 3.088605   | 4.288699e-09 | 1.053304e-05         |
| 57 | M210   | trans_POS             | 26538      | 59        | 7352      | 16.345165        | 38             | 2.324846              | 4.741227   | 4.493842e-09 | 1.103889e-05         |
| 58 | M440   | cis_NEG               | 26538      | 46        | 4004      | 6.940387         | 24             | 3.458020              | 6.169838   | 4.745018e-09 | 1.165379e-05         |
| 59 | M388   | trans_POS             | 26538      | 34        | 7352      | 9.419248         | 26             | 2.780305              | 8.506736   | 4.768346e-09 | 1.171106e-05         |
| 60 | M6     | cis_POS               | 26538      | 2273      | 1529      | 130.960020       | 196            | 1.496640              | 1.623380   | 4.916790e-09 | 1.207564e-05         |
| 61 | M478   | cis_POS               | 26538      | 68        | 1529      | 3.917854         | 19             | 4.649594              | 6.408572   | 5.618313e-09 | 1.379858e-05         |
| 62 | M249   | trans_NEG             | 26538      | 113       | 8266      | 35.197001        | 65             | 1.846748              | 3.009046   | 5.849913e-09 | 1.438739e-05         |
| 63 | M399   | cis_NEG               | 26538      | 644       | 4004      | 97.165423        | 152            | 1.564342              | 1.767793   | 5.900955e-09 | 1.449282e-05         |
| 64 | M121   | trans_NEG             | 26538      | 194       | 8266      | 60.426709        | 99             | 1.638348              | 2.319520   | 5.929529e-09 | 1.450169e-05         |
| 65 | M20    | trans_POS             | 26538      | 496       | 7352      | 137.410204       | 196            | 1.426386              | 1.724203   | 6.389962e-09 | 1.569375e-05         |
| 66 | M667   | cis_NEG               | 26538      | 60        | 4004      | 9.052679         | 28             | 3.093007              | 4.951723   | 6.537347e-09 | 1.605572e-05         |
| 67 | M410   | trans_POS             | 26538      | 172       | 7352      | 47.650313        | 83             | 1.741856              | 2.449887   | 7.551370e-09 | 1.854617e-05         |
| 68 | M373   | cis_NEG               | 26538      | 71        | 4004      | 10.712337        | 31             | 2.893860              | 4.387741   | 7.600178e-09 | 1.866604e-05         |
| 69 | M371   | trans_NEG             | 26538      | 59        | 8266      | 18.377195        | 40             | 2.176611              | 4.671124   | 7.679017e-09 | 1.885955e-05         |
| 70 | M634   | trans_POS             | 26538      | 100       | 7352      | 27.703670        | 55             | 1.985297              | 3.205882   | 8.217439e-09 | 2.018202e-05         |
| 71 | M421   | trans_NEG             | 26538      | 98        | 8266      | 29.801877        | 57             | 1.906235              | 3.246060   | 1.022311e-08 | 2.510786e-05         |
| 72 | M114   | trans_NEG             | 26538      | 112       | 8266      | 34.885523        | 64             | 1.834572              | 2.962395   | 1.091967e-08 | 2.681870e-05         |
| 73 | M50    | cis_NEG               | 26538      | 38        | 4004      | 5.733363         | 21             | 3.682771              | 6.982635   | 1.126172e-08 | 2.765878e-05         |
| 74 | M727   | cis_POS               | 26538      | 110       | 1529      | 6.337704         | 24             | 3.786860              | 4.620818   | 1.306372e-08 | 3.208469e-05         |
| 75 | M168   | trans_NEG             | 26538      | 90        | 8266      | 28.033009        | 54             | 1.505301              | 3.330960   | 1.485639e-08 | 3.648727e-05         |
| 76 | M404   | trans_POS             | 26538      | 61        | 7352      | 16.899239        | 38             | 2.248822              | 4.328443   | 1.744373e-08 | 4.284180e-05         |
| 77 | M642   | trans_NEG             | 26538      | 52        | 8266      | 16.196850        | 36             | 2.222654              | 4.990320   | 1.833796e-08 | 4.503804e-05         |
| 78 | M417   | trans_NEG             | 26538      | 86        | 8266      | 26.787098        | 52             | 1.941233              | 3.395344   | 1.890248e-08 | 4.642448e-05         |
| 79 | M137   | trans_NEG             | 26538      | 243       | 8266      | 75.689125        | 117            | 1.545797              | 2.067715   | 2.043079e-08 | 5.017801e-05         |
| 80 | M104   | cis_POS               | 26538      | 244       | 1529      | 14.098181        | 38             | 2.703052              | 3.068395   | 2.258567e-08 | 5.547041e-05         |
| 81 | M301   | cis_POS               | 26538      | 113       | 1529      | 6.510551         | 24             | 3.686324              | 4.464653   | 2.279233e-08 | 5.997797e-05         |
| 82 | M372   | trans_POS             | 26538      | 28        | 7352      | 7.757028         | 22             | 2.836138              | 9.593169   | 3.186704e-08 | 7.828545e-05         |
| 83 | M14    | trans_POS             | 26538      | 280       | 7352      | 77.570277        | 120            | 1.546984              | 1.973135   | 3.271788e-08 | 8.035461e-05         |
| 84 | M437   | trans_NEG             | 26538      | 76        | 8266      | 23.672319        | 47             | 1.985441              | 3.597104   | 3.326099e-08 | 8.168900e-05         |
| 85 | M60    | trans_POS             | 26538      | 147       | 7352      | 40.724395        | 72             | 1.767982              | 2.520038   | 3.348565e-08 | 8.224076e-05         |
| 86 | M388   | cis_NEG               | 26538      | 34        | 4004      | 5.128652         | 19             | 3.703811              | 7.156999   | 4.429541e-08 | 1.087895e-04         |
| 87 | M684   | cis_NEG               | 26538      | 47        | 4004      | 7.091265         | 23             | 3.243427              | 5.418306   | 4.775602e-08 | 1.172889e-04         |
| 88 | M103   | trans_POS             | 26538      | 312       | 7352      | 86.435451        | 130            | 1.504013              | 1.879421   | 6.674623e-08 | 1.638287e-04         |
| 89 | M414   | trans_POS             | 26538      | 43        | 7352      | 11.912578        | 29             | 2.434402              | 5.422724   | 6.720899e-08 | 1.659529e-04         |
| 90 | M388   | trans_NEG             | 26538      | 34        | 8266      | 10.590246        | 26             | 2.455089              | 7.202958   | 6.974746e-08 | 1.713668e-04         |
| 91 | M168   | trans_POS             | 26538      | 90        | 7352      | 24.933303        | 49             | 1.965243              | 3.132778   | 8.093979e-08 | 1.987881e-04         |
| 92 | M371   | trans_POS             | 26538      | 59        | 7352      | 16.345165        | 36             | 2.202486              | 4.099534   | 8.912022e-   |                      |

|    | module | methylation_signature | Background | set1_size | set2_size | expected_overlap | actual_overlap | enrichment.foldchange | odds_ratio | FET_pvalue   | corrected_FET_pvalue |
|----|--------|-----------------------|------------|-----------|-----------|------------------|----------------|-----------------------|------------|--------------|----------------------|
| 1  | M685   | cis_NEG               | 26538      | 54        | 4004      | 8.147411         | 24             | 2.945721              | 4.523276   | 2.452621e-07 | 0.0006023637         |
| 2  | M153   | cis_NEG               | 26538      | 37        | 4004      | 5.562485         | 19             | 3.403502              | 5.963486   | 2.666241e-07 | 0.0006548289         |
| 3  | M715   | trans_POS             | 26538      | 30        | 7352      | 8.311101         | 22             | 2.647062              | 7.193788   | 2.687533e-07 | 0.0006600580         |
| 4  | M640   | cis_NEG               | 26538      | 85        | 4004      | 12.824629        | 32             | 2.495199              | 3.417062   | 2.951251e-07 | 0.0007249272         |
| 5  | M116   | cis_NEG               | 26538      | 454       | 4004      | 68.498006        | 109            | 1.591273              | 1.799805   | 3.321740e-07 | 0.0008158193         |
| 6  | M456   | cis_NEG               | 26538      | 106       | 4004      | 15.930367        | 37             | 2.313503              | 3.036488   | 3.412852e-07 | 0.0008361915         |
| 7  | M438   | cis_POS               | 26538      | 112       | 1529      | 6.452935         | 22             | 3.409301              | 4.041867   | 3.686885e-07 | 0.0009054990         |
| 8  | M386   | cis_POS               | 26538      | 130       | 1529      | 7.490014         | 24             | 3.204266              | 3.745903   | 3.697673e-07 | 0.0009081466         |
| 9  | M442   | trans_NEG             | 26538      | 30        | 8266      | 9.344336         | 23             | 2.481384              | 7.279863   | 3.766537e-07 | 0.0009250616         |
| 10 | M715   | trans_NEG             | 26538      | 30        | 8266      | 9.344336         | 23             | 2.481384              | 7.279863   | 3.766537e-07 | 0.0009250616         |
| 11 | M156   | cis_NEG               | 26538      | 17        | 4004      | 2.564926         | 12             | 4.678498              | 13.541932  | 4.025886e-07 | 0.0009887575         |
| 12 | M226   | trans_NEG             | 26538      | 223       | 8266      | 69.459567        | 105            | 1.511671              | 1.979429   | 4.218778e-07 | 0.0010361319         |
| 13 | M414   | cis_POS               | 26538      | 43        | 1529      | 2.477466         | 13             | 5.247296              | 7.138140   | 5.268278e-07 | 0.0012938891         |
| 14 | M624   | trans_POS             | 26538      | 14        | 7352      | 3.878514         | 13             | 3.351799              | 33.979694  | 5.845417e-07 | 0.0014396343         |
| 15 | M442   | cis_NEG               | 26538      | 60        | 4004      | 9.052679         | 25             | 2.761613              | 4.038685   | 6.241998e-07 | 0.0015330351         |
| 16 | M139   | trans_NEG             | 26538      | 86        | 8266      | 26.787098        | 49             | 1.829239              | 2.938781   | 6.252048e-07 | 0.0015355031         |
| 17 | M117   | trans_NEG             | 26538      | 637       | 8266      | 198.411410       | 256            | 1.290248              | 1.500765   | 6.405917e-07 | 0.0015732933         |
| 18 | M535   | trans_POS             | 26538      | 25        | 7352      | 6.825918         | 19             | 2.743319              | 8.281533   | 7.195871e-07 | 0.0017673000         |
| 19 | M36    | trans_POS             | 26538      | 225       | 7352      | 62.332558        | 96             | 1.540109              | 1.954050   | 9.362255e-07 | 0.0022993698         |
| 20 | M427   | trans_POS             | 26538      | 499       | 7352      | 138.241314       | 187            | 1.352707              | 1.578798   | 1.083446e-06 | 0.0026690438         |
| 21 | M640   | cis_POS               | 26538      | 85        | 1529      | 4.897317         | 18             | 3.675482              | 4.434253   | 1.328487e-06 | 0.0032627638         |
| 22 | M740   | trans_NEG             | 26538      | 24        | 8266      | 7.475469         | 19             | 2.541647              | 8.616184   | 1.733314e-06 | 0.0042570180         |
| 23 | M600   | trans_NEG             | 26538      | 48        | 8266      | 14.950938        | 31             | 2.073448              | 4.041780   | 1.883449e-06 | 0.0046257505         |
| 24 | M724   | trans_POS             | 26538      | 41        | 7352      | 11.588505        | 26             | 2.289034              | 4.535499   | 1.938966e-06 | 0.0047621012         |
| 25 | M600   | cis_POS               | 26538      | 48        | 1529      | 2.765544         | 13             | 4.700703              | 6.117876   | 2.121000e-06 | 0.0052093226         |
| 26 | M666   | cis_NEG               | 26538      | 52        | 4004      | 7.845555         | 22             | 2.804190              | 4.144210   | 2.140903e-06 | 0.0052580589         |
| 27 | M565   | trans_NEG             | 26538      | 44        | 8266      | 13.705027        | 29             | 2.118012              | 4.284865   | 2.183195e-06 | 0.0053619281         |
| 28 | M423   | cis_POS               | 26538      | 193       | 1529      | 8.815171         | 25             | 2.836020              | 3.230842   | 2.259579e-06 | 0.005495252          |
| 29 | M626   | trans_NEG             | 26538      | 14        | 8266      | 4.360690         | 13             | 2.981179              | 28.777289  | 2.569089e-06 | 0.0063096820         |
| 30 | M728   | trans_NEG             | 26538      | 14        | 8266      | 4.360690         | 13             | 2.981179              | 28.777289  | 2.569089e-06 | 0.0063096820         |
| 31 | M60    | cis_POS               | 26538      | 147       | 1529      | 8.469478         | 24             | 2.833705              | 3.226194   | 3.629444e-06 | 0.0089139143         |
| 32 | M41    | cis_NEG               | 26538      | 120       | 4004      | 18.105358        | 38             | 2.098826              | 2.623262   | 3.882303e-06 | 0.0090434912         |
| 33 | M634   | cis_POS               | 26538      | 100       | 1529      | 5.761549         | 19             | 3.297724              | 3.872496   | 3.802924e-06 | 0.0093399812         |
| 34 | M243   | trans_NEG             | 26538      | 76        | 8266      | 23.672319        | 43             | 1.816468              | 2.890055   | 3.843427e-06 | 0.0094394556         |
| 35 | M764   | cis_POS               | 26538      | 67        | 1529      | 3.860238         | 15             | 3.885771              | 4.754667   | 4.824757e-06 | 0.0118496029         |
| 36 | M361   | trans_NEG             | 26538      | 27        | 8266      | 8.409603         | 20             | 2.378149              | 6.327960   | 5.574303e-06 | 0.0136807094         |
| 37 | M642   | cis_POS               | 26538      | 52        | 1529      | 2.996006         | 13             | 4.339111              | 5.490376   | 5.626503e-06 | 0.0138186924         |
| 38 | M364   | trans_NEG             | 26538      | 29        | 8266      | 9.032859         | 21             | 2.324845              | 5.814149   | 5.865257e-06 | 0.0144050714         |
| 39 | M30    | cis_NEG               | 26538      | 59        | 4004      | 8.901801         | 23             | 2.583747              | 3.610352   | 6.747877e-06 | 0.0165727856         |
| 40 | M478   | trans_NEG             | 26538      | 68        | 8266      | 21.180496        | 39             | 1.841317              | 2.981958   | 6.867860e-06 | 0.0168674644         |
| 41 | M656   | trans_POS             | 26538      | 55        | 7352      | 15.237019        | 31             | 2.034519              | 3.380508   | 7.346371e-06 | 0.0180426880         |
| 42 | M77    | trans_POS             | 26538      | 60        | 7352      | 16.822202        | 33             | 1.985297              | 3.189243   | 7.697101e-06 | 0.0188904803         |
| 43 | M421   | trans_POS             | 26538      | 96        | 7352      | 26.595523        | 47             | 1.767215              | 2.512693   | 7.719226e-06 | 0.0189584191         |
| 44 | M361   | cis_NEG               | 26538      | 27        | 4004      | 4.073706         | 14             | 3.436674              | 6.077914   | 8.802990e-06 | 0.0216200454         |
| 45 | M673   | cis_NEG               | 26538      | 10        | 4004      | 1.508780         | 8              | 5.302298              | 22.545680  | 9.013974e-06 | 0.0221363205         |
| 46 | M759   | trans_NEG             | 26538      | 20        | 8266      | 6.229558         | 16             | 2.568401              | 8.856407   | 9.453529e-06 | 0.0232179869         |
| 47 | M489   | cis_NEG               | 26538      | 41        | 4004      | 6.185997         | 18             | 2.909796              | 4.419695   | 9.574967e-06 | 0.0235161199         |
| 48 | M668   | cis_NEG               | 26538      | 34        | 4004      | 5.129852         | 16             | 3.118999              | 5.018287   | 1.008699e-05 | 0.0247734098         |
| 49 | M539   | trans_POS             | 26538      | 14        | 7352      | 3.878514         | 12             | 3.093969              | 15.684163  | 1.025145e-05 | 0.0251775649         |
| 50 | M28    | trans_NEG             | 26538      | 244       | 8266      | 76.000603        | 108            | 1.421041              | 1.765281   | 1.047084e-05 | 0.0257163732         |
| 51 | M101   | trans_POS             | 26538      | 236       | 7352      | 65.380662        | 96             | 1.468324              | 1.799801   | 1.081845e-05 | 0.0265701086         |
| 52 | M740   | trans_POS             | 26538      | 24        | 7352      | 6.648881         | 17             | 2.556821              | 6.348820   | 1.379738e-05 | 0.0288863880         |
| 53 | M388   | cis_POS               | 26538      | 34        | 1529      | 1.959927         | 10             | 5.104836              | 6.850263   | 1.434762e-05 | 0.0352377498         |
| 54 | M703   | trans_POS             | 26538      | 20        | 7352      | 5.540734         | 15             | 2.707223              | 7.841709   | 1.493564e-05 | 0.0366819233         |
| 55 | M716   | trans_POS             | 26538      | 20        | 7352      | 5.540734         | 15             | 2.707223              | 7.841709   | 1.493564e-05 | 0.0366819233         |
| 56 | M759   | trans_POS             | 26538      | 20        | 7352      | 5.540734         | 15             | 2.707223              | 7.841709   | 1.493564e-05 | 0.0366819233         |
| 57 | M620   | trans_POS             | 26538      | 117       | 7352      | 32.413294        | 54             | 1.665983              | 2.245932   | 1.525816e-05 | 0.0374740370         |
| 58 | M127   | cis_NEG               | 26538      | 185       | 4004      | 27.912427        | 90             | 1.781317              | 2.098061   | 1.910203e-05 | 0.0469190512         |
| 59 | M150   | cis_NEG               | 26538      | 16        | 4004      | 2.414048         | 10             | 4.142420              | 9.399957   | 2.011218e-05 | 0.0493955123         |
